# Supplementary material for: A genomic portrait of the genetic architecture and regulatory impact of microRNA expression in response to infection
Source: HighWire-hosted journal article supplement (doi:10.1101/gr.161471.113), 2014-01-30
Supplement: Supplemental_Tables.xlsx [file Supplemental_Tables.xlsx]

## Sheet: Table S1
Table S1. List of expressed miRNAs, ranked by statistical support for their differential expression upon MTB infection
miRNA	log2FC	P-value	FDR-corrected p-value	Bonferroni p-value
hsa-miR-155	1.71882755522192	2.97306910529587e-29	1.10300863806477e-26	1.10300863806477e-26
hsa-miR-29a	1.47187873269796	9.62969638516523e-26	1.78630867944815e-23	3.5726173588963e-23
hsa-miR-212	1.60475752074132	1.56210731460501e-25	1.9318060457282e-23	5.79541813718459e-23
hsa-miR-132	1.63688481675793	4.61681965273106e-25	4.28210022790806e-23	1.71284009116322e-22
hsa-miR-630	1.36095099566936	4.47356339442214e-24	3.31938403866123e-22	1.65969201933061e-21
hsa-miR-146a	1.19539865263242	7.02026765720709e-24	4.34086550137305e-22	2.60451930082383e-21
hsa-miR-132*	1.2795005782152	1.83738235644848e-23	9.73812648917692e-22	6.81668854242385e-21
hsa-miR-449a	1.4123615720089	5.75641369242078e-23	2.66953684986013e-21	2.13562947988811e-20
hsa-miR-29b-1*	1.35598565501909	1.64834745388226e-22	6.79485450433689e-21	6.1153690539032e-20
hsa-miR-1268	1.06895904470096	3.39827964303637e-22	1.26076174756649e-20	1.26076174756649e-19
hsa-miR-34a	0.998397675802768	6.97229496593834e-22	2.35156493851193e-20	2.58672143236312e-19
hsa-miR-378	-0.995109862394064	8.66003824325942e-22	2.67739515687437e-20	3.21287418824925e-19
hsa-miR-671-5p	1.49158854966753	1.15939217704852e-19	3.30872690526922e-18	4.30134497684999e-17
hsa-miR-7	0.854070227181762	1.63568544505423e-19	4.3345664293937e-18	6.06839300115118e-17
hsa-miR-361-5p	-1.2288500796977	2.80899391857304e-19	6.62555893973169e-18	1.0421367437906e-16
hsa-miR-222	1.25211630133888	2.85738390931825e-19	6.62555893973169e-18	1.06008943035707e-16
hsa-miR-1290	1.2544268380634	6.60816740077189e-19	1.4421353562861e-17	2.45163010568637e-16
hsa-miR-185	-1.14295737922288	7.16265039878333e-19	1.47630183219367e-17	2.65734329794861e-16
hsa-miR-34a*	1.22718886394086	1.6649082494446e-18	3.25095242391551e-17	6.17680960543947e-16
hsa-miR-27b	-0.751318775262863	2.63460648012677e-18	4.88719502063516e-17	9.77439004127032e-16
hsa-miR-505	0.616666380404142	3.23678548960892e-18	5.71832103164243e-17	1.20084741664491e-15
hsa-miR-1246	1.24397803895124	5.48668688794816e-18	9.25254925194894e-17	2.03556083542877e-15
hsa-miR-34b*	0.942334510307328	6.03142099781186e-18	9.72894430516609e-17	2.2376571901882e-15
hsa-miR-378*	-0.91286729195437	3.10746330334315e-17	4.80362035641796e-16	1.15286888554031e-14
hsa-miR-19b	-0.975246957835673	6.19653853748358e-17	8.95482839195841e-16	2.29891579740641e-14
hsa-miR-1183	1.2038150514616	6.27562097549646e-17	8.95482839195841e-16	2.32825538190919e-14
hsa-miR-503	-0.862460178134964	3.54901600219204e-16	4.8766108770861e-15	1.31668493681325e-13
hsa-miR-642b	0.791012243539118	4.3043968131236e-16	5.70332577738878e-15	1.59693121766886e-13
hsa-miR-106b	-0.689640915762525	5.74335647163419e-16	7.34753534819408e-15	2.13078525097628e-13
hsa-miR-345	-0.957440934539675	7.0269280724013e-16	8.68996771620294e-15	2.60699031486088e-13
hsa-miR-483-5p	1.04632544286195	8.18132340927e-16	9.79119672528764e-15	3.03527098483917e-13
hsa-miR-505*	0.83338518950985	1.29774256857827e-15	1.50457029044543e-14	4.81462492942537e-13
hsa-miR-186	0.715743353463878	1.43404753127179e-15	1.61221707303586e-14	5.32031634101835e-13
hsa-miR-150	0.458963126539347	1.71675400303552e-15	1.87328157390053e-14	6.36915735126179e-13
hsa-miR-371-5p	1.12164613741488	3.6280404460336e-15	3.84572287279561e-14	1.34600300547846e-12
hsa-miR-103a	-0.651796252794638	4.44115085120329e-15	4.57685268276783e-14	1.64766696579642e-12
hsa-miR-30d	-0.81516649462307	5.81983837432315e-15	5.83556766722673e-14	2.15916003687389e-12
hsa-miR-484	-0.610280553723321	7.77688503764294e-15	7.59269565517245e-14	2.88522434896553e-12
hsa-miR-134	1.13013335571669	9.6056627901235e-15	9.13769460291236e-14	3.56370089513582e-12
hsa-miR-340	-0.554944280054365	1.13279241550045e-14	1.05066496537667e-13	4.20265986150667e-12
hsa-miR-27a	-1.10202198368506	1.76740208884065e-14	1.59928335356069e-13	6.55706174959881e-12
hsa-miR-542-5p	-0.6943806514881	1.83554466164006e-14	1.62139778444872e-13	6.80987069468461e-12
hsa-miR-652	0.50670008136276	2.13092728934521e-14	1.83854424266761e-13	7.90574024347071e-12
hsa-miR-4317	0.600825134222797	2.26342163906367e-14	1.90847597293777e-13	8.3972942809262e-12
hsa-miR-30e	-0.73034977266572	2.35761012584699e-14	1.94371857042052e-13	8.74673356689232e-12
hsa-miR-342-5p	-0.372892146410623	2.69444856300521e-14	2.17313134103246e-13	9.99640416874931e-12
hsa-miR-140-3p	-0.765905717076301	4.6279794063957e-14	3.65314970164427e-13	1.71698035977281e-11
hsa-miR-22*	0.41720084139598	4.83468078582817e-14	3.73680535737969e-13	1.79366657154225e-11
hsa-miR-29b	0.696548788991374	7.49087277083382e-14	5.67166081220275e-13	2.77911379797935e-11
hsa-miR-542-3p	-0.626895294150442	1.83479532606207e-13	1.35570174130059e-12	6.8070906596903e-11
hsa-miR-320c	0.811338600676913	1.86363312146442e-13	1.35570174130059e-12	6.914078880633e-11
hsa-miR-339-3p	-0.936205698788798	3.0988979153813e-13	2.2109444742432e-12	1.14969112660646e-10
hsa-let-7e	0.329463846880108	4.04543866258983e-13	2.83180706381288e-12	1.50085774382083e-10
hsa-miR-874	-0.529057826471508	4.15562248018873e-13	2.85506655583337e-12	1.54173594015002e-10
hsa-miR-769-5p	-0.71105592963769	4.6287919601112e-13	3.12233057672955e-12	1.71728181720125e-10
hsa-miR-130b	-0.716674739820937	4.94592058085858e-13	3.27667238481881e-12	1.83493653549854e-10
hsa-miR-93	-0.628798715224563	5.53356816218711e-13	3.60167331258143e-12	2.05295378817142e-10
hsa-miR-3679-5p	0.708896266915608	7.3678559945859e-13	4.71288719653684e-12	2.73347457399137e-10
hsa-miR-320a	-0.70031553100117	1.05001478003455e-12	6.6026353117427e-12	3.89555483392819e-10
hsa-miR-1307	0.917402458696222	1.1025598207287e-12	6.81749489150577e-12	4.09049693490346e-10
hsa-miR-1181	-0.341637728879182	1.23248021173795e-12	7.49590423860291e-12	4.57250158554778e-10
hsa-miR-152	-0.466926810925197	1.48393287069999e-12	8.8796628230596e-12	5.50539095029695e-10
hsa-miR-939	-0.821761078484884	1.687190410373e-12	9.93567686108541e-12	6.25947642248381e-10
hsa-miR-765	0.816374895707285	2.76700562267306e-12	1.60399857189329e-11	1.02655908601171e-09
hsa-miR-142-3p	-0.671515337976025	3.11640742007911e-12	1.76053969103038e-11	1.15618715284935e-09
hsa-miR-140-5p	-0.345763212622544	3.13195740183302e-12	1.76053969103038e-11	1.16195619608005e-09
hsa-let-7i	0.562292619866466	3.20691486773765e-12	1.77576927750846e-11	1.18976541593067e-09
hsa-miR-575	0.646910841471697	8.95239426990595e-12	4.88432099137516e-11	3.32133827413511e-09
hsa-miR-1207-5p	0.797792507771067	1.97170733392125e-11	1.06014988534027e-10	7.31503420884783e-09
hsa-miR-324-5p	-0.405153515078598	3.46186407933969e-11	1.83478796205003e-10	1.28435157343502e-08
hsa-miR-99a	-0.414567303366673	3.84433465393902e-11	2.0088002205794e-10	1.42624815661138e-08
hsa-miR-1274b_v16.0	-0.79773143199585	4.60735994651503e-11	2.37407019466261e-10	1.70933054015708e-08
hsa-miR-423-3p	-0.841957839944357	7.01085580982542e-11	3.56305137732223e-10	2.60102750544523e-08
hsa-miR-199b-5p	-0.437794081051463	7.2197248829191e-11	3.61961882643647e-10	2.67851793156299e-08
hsa-miR-551b	0.327043737805771	7.37846904584922e-11	3.64988268801341e-10	2.73741201601006e-08
hsa-miR-424	-0.459534788170258	1.00005884442024e-10	4.88186620105141e-10	3.71021831279907e-08
hsa-miR-125a-5p	0.24677058286869	1.5067744639634e-10	7.25991332636911e-10	5.59013326130421e-08
hsa-miR-1274a_v16.0	-0.737679190637222	1.70888444680734e-10	8.12815550981442e-10	6.33996129765525e-08
hsa-miR-425*	-0.838358863301641	1.93347560835147e-10	9.07999304681515e-10	7.17319450698397e-08
hsa-miR-135a*	-0.269935113823217	1.96034754637586e-10	9.09111174631805e-10	7.27288939705444e-08
hsa-miR-19a	-0.521502868163628	2.62316759984989e-10	1.20147553030161e-09	9.73195179544307e-08
hsa-miR-21*	-0.719760708914212	2.91558013613384e-10	1.31912223232397e-09	1.08168023050566e-07
hsa-miR-1914*	-0.48192139026395	3.60684966212147e-10	1.61221834294827e-09	1.33814122464706e-07
hsa-miR-3652	-0.286973425932901	4.24262082999329e-10	1.8738241999137e-09	1.57401232792751e-07
hsa-miR-494	-0.376703194356615	4.39388373748876e-10	1.91780101953921e-09	1.63013086660833e-07
hsa-miR-513b	-0.282989637118738	5.00508832616632e-10	2.15917182442756e-09	1.85688776900771e-07
hsa-miR-1225-5p	0.399237310822859	5.95219362323949e-10	2.53823429220902e-09	2.20826383422185e-07
hsa-miR-99b	0.292965198755092	8.15075580892418e-10	3.43628455126235e-09	3.02393040511087e-07
hsa-miR-197	-0.45514491083535	9.88642248443377e-10	4.06262276537331e-09	3.66786274172493e-07
hsa-miR-147b	0.912552671084316	9.95474697990893e-10	4.06262276537331e-09	3.69321112954621e-07
hsa-miR-342-3p	-0.661048033153509	9.96492376412322e-10	4.06262276537331e-09	3.69698671648971e-07
hsa-miR-625	0.486428730446764	1.04745208249834e-09	4.2239643761618e-09	3.88604722606886e-07
hsa-miR-574-3p	-0.562574368478987	1.06770145332685e-09	4.25932515251894e-09	3.96117239184261e-07
hsa-miR-451	0.653375903283556	1.23185395153227e-09	4.86189165977097e-09	4.57017816018471e-07
hsa-miR-155*	1.07720934642268	1.26678821424776e-09	4.94714134195703e-09	4.69978427485918e-07
hsa-miR-4327	0.60335376076344	1.71024517940158e-09	6.60938501622904e-09	6.34500961557988e-07
hsa-miR-3667-5p	0.798247200679746	2.53689526088277e-09	9.70297053389183e-09	9.41188141787507e-07
hsa-let-7c	-0.46126219662474	2.62446967260835e-09	9.93549233201732e-09	9.73678248537697e-07
hsa-miR-1280	-0.763073625376744	2.73947387850498e-09	1.02661091810641e-08	1.01634480892535e-06
hsa-miR-940	-0.77378497162018	3.24990688823981e-09	1.20571545553697e-08	1.20571545553697e-06
hsa-miR-766	-0.503212322585737	3.96616338258409e-09	1.4516834227816e-08	1.4714466149387e-06
hsa-miR-1275	0.345053597857656	3.99115118931869e-09	1.4516834227816e-08	1.48071709123723e-06
hsa-miR-590-5p	-0.287151541147693	4.50473173872052e-09	1.61972586012291e-08	1.67125547506531e-06
hsa-miR-326	-0.590756347604515	4.54047141382164e-09	1.61972586012291e-08	1.68451489452783e-06
hsa-miR-1202	0.540008271969483	5.70630773217766e-09	2.01622873203611e-08	2.11704016863791e-06
hsa-miR-125a-3p	0.667411821372629	5.91043457847431e-09	2.06865210246601e-08	2.19277122861397e-06
hsa-miR-4291	-0.608146991774315	6.80598751328811e-09	2.35983305367279e-08	2.52502136742989e-06
hsa-miR-4313	-0.657054618634459	7.19362225409141e-09	2.47114245950733e-08	2.66883385626791e-06
hsa-miR-3195	-0.731835664904205	7.61670090133554e-09	2.59247342605091e-08	2.82579603439549e-06
hsa-miR-3198	-0.478731182324928	1.02449217879797e-08	3.45533271212769e-08	3.80086598334046e-06
hsa-miR-142-5p	-0.622214038623839	1.71244595944307e-08	5.72358063921963e-08	6.35317450953379e-06
hsa-miR-4299	0.643698154152702	1.90365828565381e-08	6.30586807122823e-08	7.06257223977562e-06
hsa-miR-421	-0.376708552751611	2.38026576718171e-08	7.81485486393288e-08	8.83078599624415e-06
hsa-miR-513c	-0.264650851311018	2.74562668694291e-08	8.93532895487561e-08	1.01862750085582e-05
hsa-miR-24-1*	-0.53071796570321	3.45100298722044e-08	1.11332357239894e-07	1.28032210825878e-05
hsa-miR-18a	-0.204824492392015	3.66581015865595e-08	1.17242721453565e-07	1.36001556886136e-05
hsa-miR-3937	0.662189033462003	3.88816345706256e-08	1.23291336971813e-07	1.44250864257021e-05
hsa-miR-129-3p	0.920912999987149	4.7144159361351e-08	1.48224433246282e-07	1.74904831230612e-05
hsa-miR-4306	-0.342702694033376	5.00388074402394e-08	1.56003340843099e-07	1.85643975603288e-05
hsa-miR-3162-5p	-0.223337406786301	5.63209344795842e-08	1.74125555766048e-07	2.08950666919257e-05
hsa-miR-324-3p	-0.478933917884332	7.04520328061027e-08	2.16014084058381e-07	2.61377041710641e-05
hsa-miR-1305	-0.53918807582185	7.18462150432857e-08	2.18483162139828e-07	2.6654945781059e-05
hsa-miR-4281	0.60055050516165	1.0050443339058e-07	3.03147518600856e-07	3.72871447879053e-05
hsa-miR-181b	0.341325626095489	1.06416782459631e-07	3.18392147520346e-07	3.94806262925229e-05
hsa-miR-450a	-0.32408154523355	1.19274343476435e-07	3.54006251438058e-07	4.42507814297573e-05
hsa-miR-1273c	-0.270142345955821	1.26010374744059e-07	3.71030547857507e-07	4.67498490300458e-05
hsa-miR-513a-5p	-0.246437715642477	1.37751742255846e-07	4.02408632889125e-07	5.11058963769188e-05
hsa-miR-3127-5p	-0.462348537893852	1.44253810581932e-07	4.18110654108568e-07	5.35181637258967e-05
hsa-miR-431*	-0.517961869925477	1.93065356900936e-07	5.55249979924398e-07	7.16272474102473e-05
hsa-miR-3654	-0.301182806414086	2.11503886306758e-07	6.00264437286603e-07	7.84679418198071e-05
hsa-miR-4286	-0.733289281599273	2.11953211009555e-07	6.00264437286603e-07	7.8634641284545e-05
hsa-miR-550a*	-0.399843404201207	2.4075939100946e-07	6.76679803519012e-07	8.93217340645096e-05
hsa-miR-30e*	-0.233957912038024	2.66717860586785e-07	7.4400245321577e-07	9.89523262776974e-05
hsa-miR-9*	0.859400405431326	2.95413474834256e-07	8.17898501220216e-07	0.000109598399163509
hsa-miR-4261	-0.396978585113444	3.14635646737093e-07	8.64665369921938e-07	0.000116729824939462
hsa-miR-23b*	-0.602918061943363	3.65075070757343e-07	9.95903318021869e-07	0.000135442851250974
hsa-miR-181a	-0.486341551442915	4.27958829083008e-07	1.15892500430508e-06	0.000158772725589796
hsa-miR-17*	-0.379492273212222	4.72878632944461e-07	1.2712896581333e-06	0.000175437972822395
hsa-miR-125b	-0.302718665135388	5.11190889588966e-07	1.36440158300364e-06	0.000189651820037506
hsa-miR-221*	0.18479370768422	6.91077436755189e-07	1.83135520740125e-06	0.000256389729036175
hsa-miR-3196	-0.335442325500363	6.99992628856783e-07	1.84182457663735e-06	0.000259697265305866
hsa-miR-374c	-0.320560134280029	8.30590259868056e-07	2.17006328458485e-06	0.000308148986411049
hsa-miR-718	0.440575395176367	8.84588161742575e-07	2.2949804755699e-06	0.000328182208006495
hsa-miR-762	0.66868419523373	1.34486207187547e-06	3.46488769906805e-06	0.000498943828665799
hsa-miR-500a*	-0.302749570478299	1.4391599508253e-06	3.68226442590472e-06	0.000533928341756185
hsa-miR-1288	-0.463188574421507	1.56976075471544e-06	3.98891260273581e-06	0.000582381239999429
hsa-miR-638	0.306362080886288	1.68205353797823e-06	4.24518273870697e-06	0.000624041862589924
hsa-miR-2277-3p	-0.273244485646065	1.73522560000888e-06	4.34978849731956e-06	0.000643768697603296
hsa-miR-3194-5p	-0.40626637327562	2.84555477574734e-06	7.0852404147803e-06	0.00105570082180226
hsa-miR-3125	-0.434836949312145	4.04717074555484e-06	1.00100023106723e-05	0.00150150034660085
hsa-miR-3934	-0.216461522548903	4.70565169869789e-06	1.15615680809067e-05	0.00174579678021692
hsa-miR-125b-2*	-0.354553649750825	6.21693169165779e-06	1.51742214316121e-05	0.00230648165760504
hsa-miR-20a*	0.349262557059139	6.93876897659298e-06	1.68253809824575e-05	0.00257428329031599
hsa-miR-370	-0.208263280107234	8.6602602687131e-06	2.08633542837179e-05	0.00321295655969256
hsa-miR-200c	0.276058847700194	9.35790046530489e-06	2.23985875653427e-05	0.00347178107262812
hsa-miR-150*	-0.503903169534863	1.06499468215776e-05	2.53277581461877e-05	0.00395113027080528
hsa-miR-550a	-0.533996576015804	1.18193933990726e-05	2.79299041468531e-05	0.00438499495105594
hsa-miR-193a-5p	0.543302139521891	1.22092555113851e-05	2.86685683210372e-05	0.00452963379472387
hsa-miR-1261	-0.368116370523415	1.23904832296476e-05	2.89111275358444e-05	0.00459686927819927
hsa-miR-301a	-0.3093276038182	1.54396548070887e-05	3.58006995839369e-05	0.00572811193342991
hsa-miR-378b	-0.349411737625431	1.6514359672175e-05	3.80548288097945e-05	0.00612682743837691
hsa-miR-151-3p	-0.355255613907011	1.8028080094853e-05	4.1286529106114e-05	0.00668841771519046
hsa-miR-3653	-0.271211012260972	2.06078597745024e-05	4.69050059898183e-05	0.00764551597634039
hsa-miR-502-5p	0.187854241034426	2.16958924962042e-05	4.90803421712912e-05	0.00804917611609176
hsa-miR-1226*	-0.307099095290879	2.420298109125e-05	5.42774944120475e-05	0.00897930598485375
hsa-let-7f	0.217600635060516	2.42858869876008e-05	5.42774944120475e-05	0.00901006407239989
hsa-miR-193a-3p	0.325925807431619	2.82642206272566e-05	6.24202112615709e-05	0.0104860258527122
hsa-miR-424*	-0.406172530942644	2.82657560429755e-05	6.24202112615709e-05	0.0104865954919439
hsa-miR-365	0.202707265286598	3.20389300382882e-05	7.03339825100883e-05	0.0118864430442049
hsa-miR-148a	-0.147226438712495	4.1340670912859e-05	9.02199347568865e-05	0.0153373889086707
hsa-miR-454	0.197246968123447	4.22895233755579e-05	9.17509542241637e-05	0.015689413172332
hsa-miR-181c	0.318597904655991	4.70547148574389e-05	0.000101495925651801	0.0174572992121098
hsa-miR-338-5p	-0.31970037075621	4.85854464098615e-05	0.000104191911087044	0.0180252006180586
hsa-miR-892b	-0.385821329438687	4.96533025751313e-05	0.000105869972732033	0.0184213752553737
hsa-miR-148b	-0.223413381205432	5.32134771215594e-05	0.000112812571497706	0.0197422000120985
hsa-miR-423-5p	-0.325904170830276	5.70571515400235e-05	0.000120273881939481	0.0211682032213487
hsa-miR-4270	0.224043817552085	6.21170686553701e-05	0.000130200183452781	0.0230454324711423
hsa-miR-501-3p	-0.327768116997746	6.48002826485565e-05	0.000135061263273115	0.0240409048626145
hsa-miR-17	-0.216660471213649	7.39533363932137e-05	0.000153277585485376	0.0274366878018823
hsa-miR-28-3p	-0.49339811055774	8.81722743466611e-05	0.00018173285434784	0.0327119137826112
hsa-miR-2861	0.380376952408946	8.92771202023933e-05	0.000182993434227005	0.0331218115950879
hsa-miR-363	0.177095346583544	9.68302510947361e-05	0.000197384742616193	0.0359240231561471
hsa-miR-1228	-0.455866120553625	0.000120598031910672	0.000244491092015624	0.0447418698388592
hsa-miR-188-5p	-0.127817193610849	0.000132580990891876	0.00026732362837438	0.049187547620886
hsa-miR-126	0.408909226083611	0.000144166119401794	0.000289111515124678	0.0534856302980655
hsa-miR-3692*	-0.255715359203532	0.000148312832959499	0.000295828285096635	0.0550240610279741
hsa-miR-98	0.152296613057456	0.000152722015314064	0.00030299394482095	0.0566598676815176
hsa-miR-3907	-0.324966182443349	0.000160484518273374	0.000316700831273519	0.0595397562794217
hsa-miR-100	-0.278402007067749	0.00019888007097005	0.000390394213385654	0.0737845063298885
hsa-let-7a	0.213509841336294	0.000203883758747921	0.000398109865765677	0.0756408744954786
hsa-miR-361-3p	0.147364074346457	0.000211932288199109	0.00041165905194696	0.0786268789218693
hsa-miR-1281	-0.453887126514625	0.000227065731667589	0.000438757221086852	0.0842413864486755
hsa-miR-1469	-0.190318148028643	0.000262599243886803	0.000504789220114011	0.0974243194820041
hsa-miR-2116*	-0.446364499003161	0.000267707971323352	0.000511956996705998	0.0993196573609636
hsa-miR-1539	-0.420791610071066	0.00033830069915229	0.000643638766079486	0.1255095593855
hsa-miR-1825	-0.431196947369898	0.000353242787738553	0.000668638133933689	0.131053074251003
hsa-miR-30c	-0.161601801040503	0.000394146263073946	0.000742275449748396	0.146228263600434
hsa-miR-191*	-0.462448441177149	0.00047729437786432	0.000894324314079104	0.177076214187663
hsa-miR-665	-0.334020963528104	0.000488775565647354	0.000911234848518434	0.181335734855168
hsa-miR-1238	-0.424645391727359	0.000568834055090369	0.00105518717219263	0.211037434438527
hsa-miR-487b	-0.354587797640519	0.000583517970934928	0.00107704063291969	0.216485167216858
hsa-miR-10a	0.304899734976507	0.000592656295892351	0.00108849250384189	0.219875485776062
hsa-miR-15a	-0.231115736814009	0.000721538446051246	0.00131867371174883	0.267690763485012
hsa-let-7f-1*	-0.387111452662331	0.000749754379879828	0.00136352389674224	0.278158874935416
hsa-miR-4310	-0.364532446753456	0.000981333150917905	0.0017759736536124	0.364074598990543
hsa-miR-1224-5p	0.292470818037132	0.00099559706007944	0.00179304130723045	0.369366509289472
hsa-miR-210	-0.256138933337439	0.00102412006917326	0.00183550022059555	0.379948545663278
hsa-miR-3138	0.418578893479312	0.00109923446392502	0.00196065377940473	0.407815986116183
hsa-miR-4323	-0.351926680757985	0.00121284942238272	0.00214312393298587	0.449967135703988
hsa-miR-3646	-0.29679232407529	0.00121308901867125	0.00214312393298587	0.450056025927034
hsa-miR-320b	-0.228049243368286	0.00122891073886157	0.00216078618065234	0.455925884117644
hsa-miR-1260	-0.397056514208729	0.00132283969149928	0.00231496946012373	0.490773525546232
hsa-miR-223	0.150703623143879	0.00158692741306397	0.00276408483683912	0.588750070246732
hsa-miR-193b*	-0.166807739443424	0.00161801396836891	0.00280506159936853	0.600283182264866
hsa-miR-7-1*	0.16114776692983	0.00167978290918986	0.00289860213632297	0.623199459309438
hsa-miR-1260b	0.3481683778782	0.00195458496690249	0.00335718066074456	0.725151022720825
hsa-miR-23a	0.245692176105039	0.00206507622427764	0.00353061418989404	0.766143279207006
hsa-miR-16	0.178203291767956	0.00275685296771202	0.00469170849092275	1
hsa-miR-362-5p	-0.148855537304823	0.00277418184870234	0.00469964139666013	1
hsa-miR-193b	0.156557734022307	0.00289880210569823	0.00488843446006384	1
hsa-miR-4257	0.221062159902969	0.00299626255061682	0.00502992491528886	1
hsa-miR-1915	-0.272083580098753	0.0030506175865769	0.00509810416495509	1
hsa-miR-181a*	-0.289053761232779	0.00318840942333251	0.00528990509748684	1
hsa-miR-3656	0.198089884349248	0.00319390496452036	0.00528990509748684	1
hsa-miR-601	-0.126180010919951	0.00387937698856897	0.00639666161226261	1
hsa-miR-191	-0.18749020505211	0.00412033649135213	0.00676391521367982	1
hsa-miR-1299	0.179936843647705	0.00438448613942533	0.00716583417500792	1
hsa-miR-720	-0.29272938331312	0.00463516967187054	0.00754231556256127	1
hsa-let-7b*	-0.334006369480385	0.00491050141954553	0.00795544116441656	1
hsa-miR-3911	0.256891736860045	0.00529927973172089	0.0085479686107324	1
hsa-miR-933	-0.324649320797033	0.00545232697179322	0.00875676756075881	1
hsa-miR-21	-0.202155690750231	0.00650956569913275	0.0104096934240442	1
hsa-miR-33b*	-0.342451460458709	0.00657600161893189	0.0104708008610461	1
hsa-let-7b	-0.247419500870684	0.00686495254652627	0.0108841769006891	1
hsa-miR-107	-0.178583880157351	0.00698407830353662	0.0110259278749451	1
hsa-miR-16-2*	0.403791823763655	0.00717140532287668	0.0112736922660477	1
hsa-miR-92a	-0.225683480473127	0.00745289773168586	0.0116667723985462	1
hsa-miR-664	0.207334031115797	0.00805021424665568	0.0125488633844927	1
hsa-miR-660	0.0851041629749164	0.00905091388700987	0.0140497449877852	1
hsa-miR-374a	-0.123275164618446	0.00989476869652785	0.015295663276716	1
hsa-miR-146b-5p	0.159476129367173	0.0124744035441382	0.0191999731714371	1
hsa-miR-1234	-0.307195041421085	0.0125239717182959	0.0191999731714371	1
hsa-miR-192	0.202992492063769	0.0131865607346799	0.0201325680352521	1
hsa-miR-4271	-0.238644012534856	0.0133219913213249	0.0202559786074243	1
hsa-miR-3180-5p	-0.315134140050692	0.0139947144867319	0.0211919962227655	1
hsa-miR-221	-0.151701812760696	0.0149186454903661	0.0224992580362838	1
hsa-miR-338-3p	-0.101596555899389	0.0150273948017958	0.0225715120302277	1
hsa-miR-500a	-0.222377227788127	0.0154410755215085	0.0230993508809663	1
hsa-miR-29c	0.157395327343945	0.0171875616798798	0.0256087766394996	1
hsa-miR-149	-0.264855881850453	0.0174235790198567	0.0258565912654674	1
hsa-miR-29c*	0.172332778227795	0.0190664564359878	0.0281818937759022	1
hsa-miR-3131	0.13642185467303	0.0222242396951039	0.0327190195511252	1
hsa-miR-128	-0.102074887168101	0.0248623114861162	0.0364581721792455	1
hsa-miR-532-5p	-0.10092653968764	0.0268465760977833	0.0392129123318015	1
hsa-miR-3917	-0.140871495603379	0.0277365777800687	0.0403540013976685	1
hsa-miR-3651	-0.16530135906685	0.0300198623020909	0.0435053473206083	1
hsa-miR-19b-1*	-0.277984445569241	0.0349589891263532	0.0504660893613892	1
hsa-miR-223*	0.150804274824848	0.0373070735107552	0.0536469933042256	1
hsa-miR-629	0.29982326752426	0.0378500792367704	0.0542176810688873	1
hsa-miR-622	0.11062768148288	0.0390181381432036	0.0556338161954723	1
hsa-miR-1225-3p	-0.25957563345848	0.0391386146280816	0.0556338161954723	1
hsa-miR-23c	-0.23715065090107	0.0428226061620861	0.0606381178860074	1
hsa-miR-3141	-0.0825105571888329	0.0457187894468395	0.0644930451892678	1
hsa-miR-92b	-0.230783067853935	0.0461262157808122	0.0648213108131868	1
hsa-miR-511	-0.229829274930141	0.0487088849165717	0.0679668224155091	1
hsa-miR-195	0.15896637380006	0.0487309292790443	0.0679668224155091	1
hsa-miR-26b	0.0959223461219951	0.0541009083427375	0.0751739213301708	1
hsa-miR-34c-3p	-0.180531949522629	0.0562395728811093	0.077735219013369	1
hsa-miR-30b	-0.0827224544311533	0.056363272006998	0.077735219013369	1
hsa-miR-331-3p	-0.0879467341384123	0.0673816573858921	0.0925873884820961	1
hsa-miR-3945	0.123225064782792	0.0695227081741166	0.0951768440317242	1
hsa-miR-320e	0.159118993969678	0.0702688898548806	0.0958446990300025	1
hsa-miR-15b	0.0912815654059244	0.0731312187509964	0.0993834511231489	1
hsa-miR-296-5p	0.209870099567775	0.0745151221014725	0.100894563137395	1
hsa-miR-130a	0.0821342731630005	0.0800269819568329	0.107963673839946	1
hsa-miR-1237	-0.218246155989382	0.0820012554288765	0.110121678665513	1
hsa-miR-3161	-0.105865020384633	0.0822202290844937	0.110121678665513	1
hsa-miR-634	-0.183594247429533	0.0875662909049527	0.116860050092581	1
hsa-miR-20b	-0.0552434725260035	0.0888333704374506	0.118126094739406	1
hsa-miR-501-5p	0.153443887388989	0.0926049545772123	0.122701564814806	1
hsa-miR-1973	-0.105677939792058	0.0943399431136133	0.124555583256763	1
hsa-miR-3613-3p	-0.206861185505809	0.0957521211999104	0.125971762287825	1
hsa-miR-3610	-0.113093093653619	0.111167029958531	0.145734869662951	1
hsa-miR-374b	-0.083006199237101	0.116312584206962	0.151943551904165	1
hsa-miR-1249	0.151659418491841	0.121327247303911	0.157938276314915	1
hsa-miR-508-5p	-0.256446658380868	0.124596369658071	0.161626759241763	1
hsa-miR-30a	-0.209262797225664	0.132231004321934	0.170932761684451	1
hsa-miR-598	-0.0932878950962803	0.136578572162448	0.175939757889821	1
hsa-miR-602	-0.196408365789571	0.150396562786213	0.193069635964308	1
hsa-miR-563	-0.177955290405459	0.155091733668087	0.198410459278828	1
hsa-miR-25	0.0604061350829131	0.171808598822218	0.219041203309426	1
hsa-miR-18b	-0.0929846353298275	0.174472067188482	0.221675126462078	1
hsa-miR-101	-0.075739433495815	0.178545625138758	0.226076542411192	1
hsa-miR-4298	0.0666278280601194	0.185009046066152	0.233463796226335	1
hsa-miR-20a	-0.0618957349247585	0.186733214584583	0.234840754613153	1
hsa-miR-502-3p	-0.0936027783842071	0.188753231581986	0.236026640814119	1
hsa-miR-129*	-0.172826087705409	0.188948550732596	0.236026640814119	1
hsa-miR-3665	-0.169645940467094	0.207916648897161	0.258598731638389	1
hsa-miR-320d	0.0973541280261234	0.208412454878378	0.258598731638389	1
hsa-miR-199a-3p	0.0538536225376735	0.219747264269035	0.271754116812707	1
hsa-miR-744*	-0.133789807684913	0.221999961778226	0.273627859866185	1
hsa-miR-26a	-0.117288505885981	0.235325740629349	0.289092217793008	1
hsa-miR-1471	-0.055391887920091	0.238409472705708	0.291913908824481	1
hsa-miR-4284	0.107114112833968	0.241202415726557	0.294362158666292	1
hsa-miR-3156-5p	-0.0718780471060389	0.244428428172387	0.297321137219527	1
hsa-miR-32	-0.108151714431278	0.252575929794992	0.306227679588045	1
hsa-miR-3676	-0.170069196009821	0.268876470445864	0.324928894252168	1
hsa-miR-3614-5p	-0.134734306091512	0.279822302641294	0.337058682727014	1
hsa-miR-138-2*	0.0992072823884137	0.287692011987276	0.34541662280673	1
hsa-miR-22	-0.0526335046491311	0.290077089822703	0.347156775239428	1
hsa-let-7g	0.0523323670946348	0.300492517771932	0.358465350782594	1
hsa-miR-624*	0.106318346435248	0.316707188033885	0.376597329360805	1
hsa-miR-744	-0.0521538723717075	0.322760955537254	0.382569694901984	1
hsa-miR-564	0.0893945309336912	0.330963662253871	0.391043053172568	1
hsa-miR-23b	0.0493580924430576	0.333587308185656	0.392891718529773	1
hsa-miR-28-5p	0.0425824869337966	0.355520248162779	0.417398772368326	1
hsa-miR-1271	-0.0571435221873382	0.371950018088804	0.435310588993522	1
hsa-miR-629*	-0.120928006813037	0.386947466325876	0.451438710713522	1
hsa-miR-24	0.0634814337472778	0.390321561239541	0.453947646457271	1
hsa-miR-151-5p	0.0333359868648541	0.426163132021875	0.494082881187861	1
hsa-miR-15a*	0.116670654598963	0.434128014543203	0.501749200609123	1
hsa-miR-3663-3p	-0.10842624393446	0.451247059493568	0.519915090286067	1
hsa-miR-29a*	0.0964766534868906	0.45945089325271	0.527728425376952	1
hsa-miR-628-5p	-0.0531041311379551	0.48176716100187	0.551653138060783	1
hsa-miR-572	0.0482221211643677	0.484968793709106	0.553610530664856	1
hsa-miR-362-3p	-0.0218122154124221	0.57390299158208	0.6531227296839	1
hsa-miR-532-3p	0.0315563464916425	0.590705655117809	0.670188984858432	1
hsa-miR-3648	-0.0269455595237738	0.602349670313082	0.681316242945589	1
hsa-miR-3137	-0.0284119995760371	0.61078265992147	0.68875491437953	1
hsa-miR-582-5p	0.0276302971451281	0.638899228675882	0.716386704366519	1
hsa-miR-330-3p	0.0374554109523483	0.639148245674711	0.716386704366519	1
hsa-miR-548c-5p	0.0299433369361137	0.654738086986191	0.731650091180352	1
hsa-miR-139-3p	0.0369242542613559	0.707383533184851	0.788105978413152	1
hsa-miR-425	-0.0293025491157699	0.752508664746008	0.835870403056195	1
hsa-miR-23a*	0.028642531764945	0.772528893297487	0.855546923621994	1
hsa-miR-33a	-0.0247016872382262	0.779922153615366	0.861164044616966	1
hsa-miR-3607-3p	-0.021674184909838	0.800043644370908	0.880760213832661	1
hsa-miR-574-5p	0.015504239957512	0.817728016401521	0.897565367115279	1
hsa-miR-30c-1*	0.0339074570825875	0.824424005140315	0.902245740138811	1
hsa-miR-124	0.0147641709643776	0.923113005785565	1	1
hsa-miR-3065-5p	0.00592503787468379	0.929752164975256	1	1
hsa-let-7d	-0.00328674611136964	0.949268616583796	1	1
hsa-miR-4324	0.00784326098013749	0.957467481403648	1	1
hsa-miR-663	-0.00334422563327588	0.967782973286318	1	1
hsa-miR-340*	-0.000817980149538322	0.981556050701124	1	1
hsa-miR-141	0.00107159194151141	0.99147025626787	1	1

## Sheet: Table S2
Table S2. SNPs most strongly associated in cis with miRNA expression
						Non-infected Samples					Infected Samples					Fold Change upon infection
miR	Chr	Start	End	SNPcount1		SNP2	NoninfectedPvalue3	NoninfectedEffectSize4	Non-infected eQTL		SNP2	InfectedPvalue3	InfectedEffectSize4	Infected eQTL		SNP2	FoldChangePvalue3	FoldChangeEffectSize4	FoldChange eQTL
hsa-let-7b	chr22	44888239	44888256	50		rs9615389	0.0671651320055639	0.0538782788736445	NO		rs11090796	0.0251099538424941	0.0795625890199478	NO		rs9616084	0.0374719129293608	0.069045619271998	NO
hsa-let-7bst	chr22	44888296	44888310	50		rs7291040	0.0212754275996689	0.0839300952976397	NO		rs7291040	0.000655295486139101	0.174611499648401	NO		rs3747243	0.0499482074093405	0.0615436782167214	NO
hsa-let-7c	chr21	16834033	16834050	37		rs7279730	0.111653893946495	0.0409637140108835	NO		rs17210156	0.168552465013526	0.0308475077696042	NO		rs2155619	0.124905238474068	0.0381708360632282	NO
hsa-let-7d	chr9	95980948	95980965	32		rs10821325	0.0165146545324667	0.0906144446541912	NO		rs9299416	0.095759686988884	0.0448254238237702	NO		rs10512230	0.00882084983017274	0.107166319331179	NO
hsa-let-7e	chr19	56887862	56887879	72		rs11673260	0.0181749187612454	0.0880857755098764	NO		rs11084095	0.0146803170894777	0.0937230769106125	NO		rs4801889	0.0155017762237074	0.0922854927133434	NO
hsa-let-7f-1st	chr9	95978515	95978533	31		rs10512231	0.0183093989211016	0.0878912101165951	NO		rs10993058	0.0102686856408621	0.103157850381353	NO		rs10761317	0.00230557771292415	0.142310042994593	NO
hsa-let-7g	chr3	52277340	52277359	33		rs730050	0.0748179534504495	0.0511072503811815	NO		rs730050	0.065814908237595	0.0544012338492557	NO		rs353556	0.211311335318476	0.0254931900443497	NO
hsa-let-7i	chr12	61283740	61283759	51		rs6581454	0.0102304496991515	0.103256276827848	NO		rs7979878	0.00411913053509527	0.127178818865773	NO		rs11174598	0.0767264628671327	0.050462347968631	NO
hsa-miR-100	chr11	121528163	121528180	39		rs6589913	0.0158283802253443	0.0917350039075255	NO		rs6589913	0.00929329249596867	0.105790576076203	NO		rs3867239	0.0585468853529767	0.0574226959146063	NO
hsa-miR-106b	chr7	99529568	99529583	50		rs12705074	0.0429637240949834	0.0654692163341684	NO		rs12705074	0.0619782389286637	0.0559504180104252	NO		rs12705073	0.0205395154143348	0.0848585574243262	NO
hsa-miR-107	chr10	91342537	91342555	46		rs11185790:rs11185792	0.0774104702718093	0.0502353001547443	NO		rs303183	0.0148672270886848	0.0933890263309838	NO		rs12254170	0.0216378592624601	0.0834846455141184	NO
hsa-miR-1202	chr6	156309644	156309655	55		rs9383788	0.019167033204237	0.0866831576804825	NO		rs9784833	0.0528216295400848	0.0600901620238105	NO		rs9371946	0.0446780176657191	0.0644481145683565	NO
hsa-miR-1207-5p	chr8	129130596	129130607	97		rs3927165	0.0074071994286443	0.111768613614046	NO		rs2542419:rs6992536	0.0524154148777412	0.0602906306374024	NO		rs17382698	0.0029360254769125	0.136022418376231	NO
hsa-miR-1225-3p	chr16	2080277	2080286	46		rs13332377	0.0124458270429122	0.0980827710718631	NO		rs7187438	0.0365687346383162	0.0696846881219763	NO		rs2074969	0.0561356014492513	0.0585117778113878	NO
hsa-miR-1225-5p	chr16	2080209	2080218	46		rs13332377	0.064440788326138	0.0549450323223063	NO		rs8050755	0.00814931771694108	0.109253423353647	NO		rs13337626	0.0217853081828445	0.0833055676983132	NO
hsa-miR-1228	chr12	55874615	55874624	39		rs2306692	0.0703932096772367	0.052671146471659	NO		rs1059513	0.0379323787382519	0.0687258212568914	NO		rs841718	0.1351289020887	0.0362272886554016	NO
hsa-miR-1234	chr8	145596356	145596365	34		rs3816732	0.219632210803622	0.0245965081631093	NO		rs2272662	0.12419787006323	0.0383116560661188	NO		rs2272662	0.140469771605677	0.0352748384343904	NO
hsa-miR-1238	chr19	10523867	10523878	47		rs10402752	0.00968040767188208	0.104714198047951	NO		rs4804134	0.15406515795278	0.0330196764102136	NO		rs7248036	0.0902840438761219	0.0463163858656932	NO
hsa-miR-1246	chr2	177173968	177173982	41		rs2044642	0.0132716311069727	0.0963866417269796	NO		rs2969327	0.0523925909321129	0.0603019418199018	NO		rs1448520	0.0535884262309486	0.0597160401018576	NO
hsa-miR-1249	chr22	43975547	43975560	77		rs1057353:rs2673087	0.0082320966569957	0.108987097924189	NO		rs9614616	0.0542565621390613	0.0593945295974121	NO		rs2742630	0.00747490484503912	0.111529003314296	NO
hsa-miR-125a-3p	chr19	56888377	56888392	72		rs4802839	0.0400747576424108	0.0672881975565876	NO		rs3794978	0.0193586909218102	0.0864206191539078	NO		rs1868943	0.0204359689102139	0.0849918754231424	NO
hsa-miR-125a-5p	chr19	56888339	56888356	72		NA	NA	NA	NA		rs11084095	0.00469164955536441	0.123769400889024	NO		NA	NA	NA	NA
hsa-miR-126	chr9	138684931	138684947	65		rs10870085	0.0247611299992999	0.079931055393614	NO		rs2385891	0.0765355780827685	0.0505260887283907	NO		rs944758	0.0234554526181571	0.0813583487534484	NO
hsa-miR-1260	chr14	76802331	76802344	74		rs4899651	0.0736417970548775	0.0515133223639038	NO		rs11159250	8.34793388129716e-05	0.225686072263354	YES		rs11159250	0.00109577230970784	0.161502021722975	NO
hsa-miR-1260b	chr11	95714264	95714277	41		rs545208	0.0155573499206863	0.0921910085570005	NO		rs499866	0.20250370620265	0.0264881462245517	NO		rs545208	0.0344332919363232	0.0712619708274339	NO
hsa-miR-1268	chr15	20014603	20014614	1		rs7402159	0.403705712459656	0.0114583308279857	NO		rs7402159	0.907819831697397	0.00022157237920917	NO		rs7402159	0.324216794275049	0.0159347486268989	NO
hsa-miR-1271	chr5	175727575	175727590	28		rs2647	0.155231242084358	0.0328365784420505	NO		rs13170785:rs342015	0.000406507132963666	0.186662326454092	NO		rs13170785:rs342015	0.0335640546211604	0.0719327133392233	NO
hsa-miR-1274a_v16.0	chr5	41511509	41511521	26		rs687174	0.121590794547076	0.0388382732578927	NO		rs3913723	0.0434832473247826	0.0651554241063236	NO		rs687174	0.018068359641002	0.0882409736324956	NO
hsa-miR-1274b_v16.0	chr19	62716206	62716217	76		rs2014827	0.0275409207123839	0.0771299345758146	NO		rs726260	0.0576104020180171	0.0578400598085188	NO		rs12977037	0.038338029322367	0.0684473560491365	NO
hsa-miR-1275	chr6	34075748	34075760	66		rs2229901	0.0681623173654182	0.0534990398197069	NO		rs2495962	0.000551545893995002	0.178975770540573	NO		rs9380389	0.0169505441331216	0.0899266945635105	NO
hsa-miR-1280	chr3	129563708	129563718	33		rs2811366	0.0765014894131074	0.0505374892459811	NO		rs1010786	0.0581744543655663	0.0575878446191094	NO		rs12633037	0.082229857678183	0.0486929242831133	NO
hsa-miR-1281	chr22	39818499	39818511	22		rs926914:rs9611469	0.0200760589886721	0.085460608207464	NO		rs8138132	0.124791154254194	0.038193488881995	NO		rs13053242:rs5995992	0.0195701420707924	0.0861339798648019	NO
hsa-miR-1288	chr17	16126103	16126117	17		rs17779879	0.0177249754182747	0.0887474186413149	NO		rs7210224	0.0385780524776086	0.0682840002285455	NO		rs7477	0.253852536262708	0.0212893301591189	NO
hsa-miR-129-3p	chr11	43559580	43559597	38		NA	NA	NA	NA		rs11037478	0.00536234412784993	0.120263681379782	NO		NA	NA	NA	NA
hsa-miR-1290	chr1	19096206	19096222	73		rs12408808	0.0274205418648053	0.0772451954461198	NO		rs11261075	0.000490580482143239	0.181932613356536	NO		rs11261075	0.0147770179267539	0.0935497227847994	NO
hsa-miR-1305	chr4	183327494	183327511	90		rs2726824	7.25448991149863e-05	0.229074988450561	NO		rs17072846	0.00564527857038099	0.118913288926771	NO		rs6840333	0.026951403962238	0.0776993246901329	NO
hsa-miR-1307	chr10	105144089	105144100	37		NA	NA	NA	NA		rs11191692	0.0530562469588013	0.0599751001503462	NO		NA	NA	NA	NA
hsa-miR-130a	chr11	57165305	57165322	47		rs1424753:rs1783979	0.000465927127117281	0.183231777960115	NO		rs1557522:rs2508443	0.00165516762845643	0.150891746666363	NO		rs1115172:rs4938871:rs7112126:rs7124330	0.25433336322542	0.021246723672474	NO
hsa-miR-130b	chr22	20337648	20337664	43		rs3788329	0.000763455567867648	0.17073023624029	NO		rs3788329	0.000209296850015304	0.203205729870309	YES		rs5999264	0.0527539966215947	0.0601234286438349	NO
hsa-miR-132	chr17	1900017	1900031	53		rs12938667	0.0106296599002928	0.10224622397401	NO		rs4790852	0.00385629865616775	0.128904079043763	NO		rs9905172	0.00387352874787825	0.128787472403514	NO
hsa-miR-132st	chr17	1899977	1899995	53		rs7225086	0.0289580483949546	0.0758101381082679	NO		rs7225086	0.000478967926686855	0.182536407950535	NO		rs7225086	0.00266830654820237	0.138512185534268	NO
hsa-miR-134	chr14	100590794	100590805	47		NA	NA	NA	NA		rs12589950	0.0947398068717272	0.0450961578523918	NO		NA	NA	NA	NA
hsa-miR-135ast	chr3	52303340	52303351	29		rs3852064	0.202201715019819	0.0265231433040047	NO		rs3752819	0.230647464217581	0.023468842015165	NO		rs10460962	0.166882595335421	0.0310870333845746	NO
hsa-miR-140-3p	chr16	68524553	68524566	25		rs1112183	0.0139466278792623	0.0950767989623441	NO		rs7200005	0.00194404424883898	0.146732279728142	NO		rs1112183	0.0357856776295485	0.0702519139887327	NO
hsa-miR-141	chr12	6943585	6943600	26		rs759052	0.0179103653352182	0.088472783362599	NO		rs759052	0.0111413023722831	0.101005584530187	NO		rs11611878	0.197720810265785	0.0270496099459829	NO
hsa-miR-142-3p	chr17	53763644	53763665	47		rs8077532	0.0213683046135805	0.0838152203056182	NO		rs2680688	0.0751601249477796	0.0509903686305642	NO		rs2526378	0.118235433149883	0.0395343161709894	NO
hsa-miR-142-5p	chr17	53763610	53763627	47		rs8077532	0.058960561722943	0.0572405276360064	NO		rs12451466:rs2680691	0.0523239127004176	0.0603360083100809	NO		rs12603174	0.084143752273609	0.0481066188836302	NO
hsa-miR-146a	chr5	159844961	159844978	58		rs4921149	0.0106423106260391	0.102214837104311	NO		rs1075059:rs2910177	0.052014770170273	0.0604899251075287	NO		rs2961911	0.0498197711255453	0.0616106426914292	NO
hsa-miR-148a	chr7	25956110	25956128	38		rs10230872	0.0084596519685651	0.108268467378108	NO		rs10230872	0.0102474676752557	0.103212424226571	NO		rs4722551	0.0124447882142364	0.0980849747393464	NO
hsa-miR-148b	chr12	53017333	53017350	29		rs1140681:rs1920045:rs1920046:rs3809162:rs4759073	0.135757775114411	0.0361130188486889	NO		rs2887875	0.00181433305361248	0.148519119686016	NO		rs10876556:rs2124530:rs3809161	0.0101011000085041	0.103591983814365	NO
hsa-miR-149	chr2	241044111	241044127	57		rs6735344	0.00679379940944148	0.114044105945421	NO		rs10165842	0.0437727787926138	0.0649822086526748	NO		rs11679243	0.00308879628473608	0.134700135211124	NO
hsa-miR-150	chr19	54695874	54695890	41		rs34486765	0.00741003890701262	0.111758521077388	NO		rs34486765	0.0281018396635076	0.0765994987680393	NO		rs2293009	0.0804290390323805	0.0492578562483134	NO
hsa-miR-150st	chr19	54695914	54695925	41		rs1055637	0.0158339025330844	0.0917257941945076	NO		rs12974629	0.0610644583690034	0.0563340756552674	NO		rs2288920	0.142460488541601	0.0349299478685735	NO
hsa-miR-151-5p	chr8	141811860	141811875	17		rs10090774	0.181372250000459	0.0290931410418192	NO		rs10090774	0.0711549783432997	0.0523947073355095	NO		rs11785444	0.25279660442268	0.0213832401151795	NO
hsa-miR-152	chr17	43469585	43469599	37		rs12051	0.00349028947647263	0.131510694340804	NO		rs1010228:rs10853094:rs11079806:rs11079808:rs11079809:rs11651097:rs12936731:rs4794451:rs4794453:rs7220520:rs7222136	0.00598733888538419	0.117367460370845	NO		rs12051	0.00711178291302084	0.112840178286016	NO
hsa-miR-1539	chr18	45267778	45267790	19		rs12326448	0.0274901870111478	0.0771784490505015	NO		rs2276269	0.0448877946402115	0.0643259283094397	NO		rs4556888	0.132786594323657	0.0366580714142317	NO
hsa-miR-155	chr21	25868173	25868188	21		rs2829783	0.127913402332855	0.0375815019348033	NO		rs1893650:rs2829823:rs8129399	0.172599385662598	0.0302778976217186	NO		rs2829789	0.336187633366962	0.0151709202745409	NO
hsa-miR-155st	chr21	25868206	25868226	21		NA	NA	NA	NA		rs2829783	0.107730177749473	0.0418596679579681	NO		NA	NA	NA	NA
hsa-miR-15a	chr13	49521271	49521290	16		rs2066549:rs9596219:rs9596220	0.0296156167364517	0.0752197930504315	NO		rs2066549:rs9596219:rs9596220	0.109978157965619	0.0413421563844122	NO		rs2066549:rs9596219:rs9596220	0.184257022466716	0.0287176640832033	NO
hsa-miR-15b	chr3	161605092	161605110	15		rs1056669	0.0503102630551953	0.0613558579993764	NO		rs3851366	0.270110333380922	0.0199006091884764	NO		rs7627756	0.0912205351980392	0.046054703675766	NO
hsa-miR-17st	chr13	90800917	90800931	35		rs7332464	0.0209757060393365	0.0843042783219714	NO		rs9560769	0.0254410455093114	0.0792176029789877	NO		rs9556084	0.00396009527607558	0.128209265793607	NO
hsa-miR-181c	chr19	13846543	13846560	33		NA	NA	NA	NA		rs895819	0.124321846813756	0.038286912506475	NO		NA	NA	NA	NA
hsa-miR-1825	chr20	30289299	30289311	23		rs11905172	0.37981589897889	0.0126672612542921	NO		rs1022685:rs11907235:rs4243971:rs6057559	0.25170065967156	0.0214812104527505	NO		rs11905172	0.167261767805976	0.0310324100155747	NO
hsa-miR-185	chr22	18400682	18400697	88		rs2531708	0.0188270217189788	0.087155471318684	NO		rs2073778	0.0239764726013974	0.0807794136462623	NO		rs737985	0.0088585739150465	0.107053807168863	NO
hsa-miR-186	chr1	71305918	71305937	34		rs2206343	0.0237840986054585	0.0809916805920404	NO		rs2300164	0.0505134416639379	0.0612510652821814	NO		rs2072947	0.179136356610369	0.0293888472306601	NO
hsa-miR-188-5p	chrX	49654872	49654883	6		rs179824	0.147001700428478	0.0341626329554287	NO		rs12556180	0.0838479204332655	0.0481963210355661	NO		rs10283986	0.454430835151397	0.00920618857245621	NO
hsa-miR-18a	chr13	90801017	90801033	35		rs7322734:rs8002779:rs9523304	0.00766586947376769	0.110864607108486	NO		rs9560769	0.0158450725734357	0.0917071754231069	NO		rs17557039	0.049594141671965	0.0617287131902929	NO
hsa-miR-18b	chrX	133131746	133131764	4		rs12846492	0.213543883725649	0.0252486169489981	NO		rs175327	0.198463725762458	0.0269613805179461	NO		rs5977971	0.395936055743059	0.0118401470253883	NO
hsa-miR-191	chr3	49033079	49033092	25		rs11552724:rs11706052:rs13087930:rs34580506:rs35283189:rs35673421:rs3923475:rs5030795	0.171209888862786	0.0304717642290845	NO		rs4955426	0.240847657169288	0.0224799565926073	NO		rs4974078	0.413724231837565	0.0109813291348471	NO
hsa-miR-1914st	chr20	62043321	62043332	30		rs6122205	0.0582368397043801	0.0575601046505342	NO		rs817318	0.0195295008988567	0.0861888299396946	NO		rs6122205	0.0728469589744349	0.0517916040420171	NO
hsa-miR-1915	chr10	21825553	21825562	20		rs12764850	0.00166535439897366	0.150733310668577	NO		rs12776687	0.35360698913105	0.0141213767621817	NO		rs12776687	0.155791526941271	0.0327491449187188	NO
hsa-miR-191st	chr3	49033119	49033133	25		rs4292260:rs4955411	0.124725674469988	0.0382065008459976	NO		rs11552724:rs11706052:rs13087930:rs34580506:rs35283189:rs35673421:rs3923475:rs5030795	0.384793738750429	0.012406665662746	NO		rs11552724:rs11706052:rs13087930:rs34580506:rs35283189:rs35673421:rs3923475:rs5030795	0.274575807254319	0.0195369812239184	NO
hsa-miR-193a-3p	chr17	26911188	26911203	54		rs315431	0.0165972459603169	0.0904827448882827	NO		rs315457:rs315468	0.0278312647615568	0.0768540186033643	NO		rs16972316	0.0514324753308804	0.0607824164254492	NO
hsa-miR-193a-5p	chr17	26911158	26911169	54		rs17181735	0.00140162996573413	0.155178597625896	NO		rs12452086	0.0610143162317405	0.0563553002386105	NO		rs1126172	0.00367431308151843	0.130168082900733	NO
hsa-miR-193b	chr16	14305382	14305396	29		rs30238	0.0622712724635279	0.0558286274075911	NO		rs925339	0.0399228064679303	0.0673875480952593	NO		rs7191379	0.0621348980115427	0.0558852332030985	NO
hsa-miR-195	chr17	6861675	6861692	47		rs312456	0.046599416003885	0.063350329145791	NO		rs2920422	0.0580250075532199	0.0576544223320455	NO		rs311740	0.0310088753630523	0.0740116767404249	NO
hsa-miR-197	chr1	109943091	109943106	35		rs501163	0.0462281110541105	0.0635588092780792	NO		rs12745189	0.0146636105696568	0.0937531421192139	NO		rs12044778	0.0882780577565535	0.0468867149694016	NO
hsa-miR-1973	chr4	117440358	117440373	21		rs1032940	0.0797054883265513	0.0494885955220125	NO		rs6821696	0.0182357860024683	0.0879975346379617	NO		rs7675851	0.116179249036525	0.0399714809046526	NO
hsa-miR-19a	chr13	90801197	90801216	35		rs4773624	0.135874062667793	0.036091952162969	NO		rs9560769	0.0362495005686986	0.0699144250953228	NO		rs9523299:rs9583907	0.0130310169709706	0.0968697103056382	NO
hsa-miR-200c	chr12	6943175	6943188	26		rs1044189	0.000740744377075917	0.17149844797926	NO		rs759052	0.0180771665970827	0.08822811195825	NO		rs12302749	0.00457533797351764	0.124427465296312	NO
hsa-miR-20a	chr13	90801332	90801349	35		rs9523288	0.0158808222026063	0.0916476744190923	NO		rs9560769	0.00184190119653572	0.14812906938063	NO		rs7332464	0.0506410804970979	0.0611854550871349	NO
hsa-miR-20b	chrX	133131515	133131532	4		rs5977971	0.0273704686661006	0.0772932905670255	NO		rs5977971	0.0115993839246192	0.0999420844262554	NO		rs175327	0.0213330933931664	0.0838587120757634	NO
hsa-miR-21	chr17	55273419	55273437	27		rs1292061	0.0159678896107381	0.091503320437392	NO		rs1292045	0.0220978776052128	0.0829299514450223	NO		rs2333563:rs8067354	0.215471902871274	0.0250397876911456	NO
hsa-miR-210	chr11	558161	558175	51		rs17585	0.122150166944942	0.0387242586090177	NO		rs7936397	0.185643862740737	0.0285395235118501	NO		rs17585	0.0274693039427099	0.0771984449574564	NO
hsa-miR-2116st	chr15	57250730	57250744	41		rs3809528	0.0112093389894503	0.100844901302974	NO		rs4775136	0.0128572815789408	0.0972240806718881	NO		rs2306787	0.014330514972009	0.0943598441967427	NO
hsa-miR-212	chr17	1900391	1900405	53		rs17834271	0.0360748952875729	0.0700409532622291	NO		rs4790852	0.00952576679542299	0.105138951234264	NO		rs9905172	0.0122935194987337	0.098407836821244	NO
hsa-miR-21st	chr17	55273461	55273474	27		rs8078424	0.127999316831289	0.037564892191115	NO		rs1292045	0.190000262161775	0.0279896396659794	NO		rs1292045	0.429328667048039	0.0102710716630695	NO
hsa-miR-22	chr17	1564003	1564020	55		rs3809800	0.0134244374209109	0.0960843815902733	NO		rs3809800	0.00490281433816026	0.122614877228184	NO		rs8074026	0.00904233494526765	0.106512463534251	NO
hsa-miR-221	chrX	45490598	45490615	32		rs5906072	0.123364682262577	0.0384786434904302	NO		rs17144771	0.0310137345692123	0.074007560286957	NO		rs12837681	0.0666968081940944	0.0540584156552164	NO
hsa-miR-221st	chrX	45490555	45490574	32		rs4824560	0.123870076304582	0.0383772071302878	NO		rs7050010	0.104307960445973	0.0426701407649534	NO		rs5906069	0.00106848231862617	0.162148193792728	NO
hsa-miR-222	chrX	45491442	45491453	31		rs5905471	0.180508293511743	0.0292069110737117	NO		rs5905473	0.116478729752229	0.0399072914101541	NO		rs5905473	0.015414313180926	0.092434882834066	NO
hsa-miR-223	chrX	65155506	65155525	16		rs3843787:rs5965083	0.368116628674462	0.0132988303286375	NO		rs606886	0.0332063853060655	0.0722138502564144	NO		rs5918974:rs5918977:rs5918991:rs6624850	0.0177530232310003	0.0887056843111487	NO
hsa-miR-223st	chrX	65155463	65155483	16		rs5965073:rs6525038	0.0334332226263671	0.0720351957975195	NO		rs670546	0.528573273435883	0.00654244352173955	NO		rs670546	0.386997744508713	0.0122927849410676	NO
hsa-miR-22st	chr17	1563966	1563982	55		rs1057355	0.0459260544403992	0.0637296792674437	NO		rs4790812	0.0177434908594355	0.0887198607780825	NO		rs11658342	0.0533506617018664	0.0598314522972966	NO
hsa-miR-23a	chr19	13808449	13808465	43		rs12610873:rs3745453	0.0339088598106346	0.0716645559936932	NO		rs2305777	0.0823224517989893	0.0486642295304362	NO		rs895819	0.0375454159638422	0.0689943028364243	NO
hsa-miR-23ast	chr19	13808417	13808430	43		rs8107465	0.181091905641593	0.0291299907630516	NO		rs897790	0.119117873728221	0.0393492112503516	NO		rs1059721	0.0621300488287836	0.0558872483568546	NO
hsa-miR-23b	chr9	96887373	96887388	12		rs1045276:rs10491560	0.121632053841662	0.0388298441617397	NO		rs899268	0.22142556992586	0.0244084453663976	NO		rs2297597:rs3780567	0.296012869477887	0.017887990271145	NO
hsa-miR-23c	chrX	19945199	19945213	12		rs5955583	0.131834123549765	0.036835622061199	NO		rs12387893	0.614214245371047	0.00419076771558035	NO		rs5955583	0.275116818459921	0.0194934208156868	NO
hsa-miR-25	chr7	99529175	99529191	50		rs12705074	0.433735662190083	0.0100773816358592	NO		rs1569055:rs6975031	0.0563330558463878	0.0584207936484588	NO		rs12705073	0.0797187707534641	0.0494843399737463	NO
hsa-miR-26b	chr2	218975626	218975644	39		rs492400:rs523396	0.240579703291371	0.0225052929188234	NO		rs1017698	0.0287482243157199	0.0760013727943426	NO		rs1809231	0.0308945707047228	0.0741086985901104	NO
hsa-miR-27a	chr19	13808309	13808324	43		rs2053814	0.0132159680710493	0.0964976112029824	NO		rs895819	0.0378722350025702	0.0687673662301214	NO		rs895819	0.0141749140416029	0.0946481057365039	NO
hsa-miR-27b	chr9	96887612	96887628	12		rs4744436	0.187114461041595	0.028352269703401	NO		rs4744436	0.471484176088602	0.00853321362575302	NO		rs899268	0.191070426579286	0.0278567565213486	NO
hsa-miR-28-3p	chr3	189889325	189889337	47		rs721397	0.18036271484312	0.0292261422924889	NO		NA	NA	NA	NA		NA	NA	NA	NA
hsa-miR-2861	chr9	129588080	129588089	50		rs1537034	0.0232355136578785	0.0816066380801489	NO		rs1537034	0.0321482290117147	0.0730639643831208	NO		rs514024	0.00454636358659577	0.124593968323134	NO
hsa-miR-29a	chr7	130212090	130212108	57		rs7781295	0.0315690819744356	0.0735413602324856	NO		rs17165295	0.0862252209522005	0.0474847250983276	NO		rs157921	0.0561562320797395	0.058502256051525	NO
hsa-miR-29b-1st	chr7	130212769	130212790	57		rs17165262	0.00785661215439334	0.110217185986714	NO		rs972283	0.0185378669723557	0.0875639287652736	NO		rs205730	0.0644050820145248	0.0549593230910967	NO
hsa-miR-29c	chr1	206041874	206041894	45		rs761277	0.0926296709701466	0.0456662661924621	NO		rs2745948	0.00805933816976186	0.109545980581114	NO		rs2724373	0.0193728334125124	0.0864013499150695	NO
hsa-miR-29cst	chr1	206041838	206041856	45		rs7541230	0.00592918032415532	0.117624016220011	NO		rs2745952	0.0145816546082401	0.0939011289160026	NO		rs3738460	0.00986938734828964	0.104204200700974	NO
hsa-miR-30b	chr8	135881966	135881982	59		rs7821456	0.00398500275824707	0.128045211363459	NO		rs12681690	0.0630921667483454	0.0554905891671208	NO		rs17519875	0.00432603801106338	0.12589549280885	NO
hsa-miR-30d	chr8	135886315	135886327	58		rs10505630	0.0296811428979246	0.0751616948463986	NO		rs7839969	0.00322552062027137	0.133570307671679	NO		rs2205362	0.0357619243225399	0.0702693171700128	NO
hsa-miR-30e	chr1	40992636	40992651	47		rs3767943	0.0258185459759602	0.0788297500453094	NO		rs729590	0.0335928642309708	0.071910200936891	NO		rs2769258	0.0313559999755935	0.0737192459036608	NO
hsa-miR-3125	chr2	12794958	12794972	44		rs10191751	0.133164182757993	0.0365880692364883	NO		rs1519544	0.201997514437399	0.0265468418166819	NO		rs11902450	0.0364725962094277	0.069753658524799	NO
hsa-miR-3127-5p	chr2	96827759	96827774	14		rs6576989	0.274267109972096	0.0195618839248272	NO		rs12473528	0.0543431186772201	0.0593531773230378	NO		rs4907254	0.206710262403493	0.0260068318107327	NO
hsa-miR-3141	chr5	153955780	153955792	46		rs4958760	0.00247473688878435	0.140470757907121	NO		rs1032741	0.103981876506913	0.0427488463476124	NO		rs13173061	0.0254278502388816	0.079231265033142	NO
hsa-miR-3162-5p	chr11	59119144	59119157	15		rs12278052:rs1453531:rs7120079	0.0317458458386696	0.0733947160035524	NO		rs7116484	0.220022761021279	0.0245553998354913	NO		rs7116484	0.126097719712248	0.0379353897026673	NO
hsa-miR-3195	chr20	60073269	60073279	39		rs2296082:rs6089599	0.0206056263707473	0.0847737914602486	NO		rs1555578:rs2057170:rs2281740:rs6089662:rs6089664	0.00963980999946087	0.104825050794988	NO		rs1555578:rs2057170:rs2281740:rs6089662:rs6089664	0.010159767229828	0.103439194936395	NO
hsa-miR-3196	chr20	61340591	61340602	41		rs11697798	0.123471554673119	0.0384571558897747	NO		rs4809500	0.000791506712284008	0.169811727524453	NO		rs755041	0.0341689162188653	0.0714641359222943	NO
hsa-miR-320e	chr19	51904428	51904441	57		rs4804000	0.108640102046414	0.0416488100197658	NO		rs314666	0.0298643057171516	0.0749999819844916	NO		rs4578773	0.0282695458121771	0.0764429858102758	NO
hsa-miR-324-5p	chr17	7067362	7067377	48		rs222843	0.00929135346380685	0.105796079091889	NO		rs222835	0.000407623675018728	0.186593455766165	NO		rs12453853	0.187888672773512	0.0282543598382635	NO
hsa-miR-326	chr11	74723847	74723862	48		rs658573	0.0639315510634002	0.055149627379803	NO		rs532751	5.15130531289363e-06	0.290632396966625	YES		rs532751	0.00183787018121926	0.148185742876148	NO
hsa-miR-338-3p	chr17	76714321	76714340	45		rs4969258	1.17809557422188e-10	0.496223012701131	YES		rs7220048	9.20849610451854e-06	0.277489302374295	YES		rs12949063	0.00691813424616456	0.113566833949825	NO
hsa-miR-338-5p	chr17	76714291	76714304	45		rs3935648	0.00555784992409802	0.119323280022549	NO		rs11870986	0.0196224447580409	0.0860635593905351	NO		rs8067235	0.0123888669418149	0.0982038723066381	NO
hsa-miR-339-3p	chr7	1029154	1029166	58		rs11977029	0.120462687640719	0.0390699475807408	NO		rs10951737	0.00931892636416237	0.105717933751078	NO		rs10266519	0.0222965285152429	0.0826940023056428	NO
hsa-miR-33bst	chr17	17657937	17657949	25		rs11652881	0.152595146723385	0.0332526988653356	NO		rs11654526	0.0381616454104789	0.0685680664869236	NO		rs11654526	0.12548183381186	0.0380566884417176	NO
hsa-miR-340	chr5	179374928	179374945	41		rs248227	0.0652784607735418	0.0546121115374715	NO		rs42414	0.00271246692855812	0.138085000361022	NO		rs26074	0.0654509956067486	0.0545440919813486	NO
hsa-miR-340st	chr5	179374968	179374987	41		rs11739898	0.0174773885030588	0.0891187205146464	NO		rs10479453	0.127134084036617	0.0377327228889465	NO		rs248221	0.00660300402427989	0.114793603803142	NO
hsa-miR-342-3p	chr14	99645813	99645827	27		rs1190950	0.00442843591557618	0.125282644989941	NO		rs1190967	0.00326446840147991	0.133257096940841	NO		rs3783330:rs6575763	0.016040054923423	0.0913842697208518	NO
hsa-miR-342-5p	chr14	99645766	99645783	27		rs1190950	0.0150502763825365	0.0930659235517417	NO		rs1190950	0.00823333325382745	0.108983139609501	NO		rs3783338	0.385107240630248	0.0123904113229864	NO
hsa-miR-345	chr14	99843975	99843987	33		rs999045	0.0711428741939577	0.0523990756188809	NO		rs3736952:rs3742384	0.00153198078079211	0.152887395711717	NO		rs4905945	0.0493818112564449	0.0618403301023732	NO
hsa-miR-34a	chr1	9134338	9134356	50		rs12736085	0.0476786061551877	0.0627539300799053	NO		rs12402600	0.0221312275361674	0.0828901909658695	NO		rs9434723	0.0501249082397894	0.0614518383934054	NO
hsa-miR-34ast	chr1	9134382	9134398	50		NA	NA	NA	NA		rs7521322	0.021590539709307	0.0835423759411742	NO		NA	NA	NA	NA
hsa-miR-361-3p	chrX	85045345	85045363	24		rs5967637:rs6617168:rs6623525	0.113887593946608	0.0404686472473649	NO		rs5967637:rs6617168:rs6623525	0.0222360477536065	0.0827656138720569	NO		rs1013032	0.00179320211553231	0.14882205748396	NO
hsa-miR-362-3p	chrX	49660356	49660374	5		rs10283986	0.0235964318912039	0.081200428595274	NO		rs10283986	0.609287780332447	0.00430810936735008	NO		rs10283986	0.022431580472853	0.0825347992813831	NO
hsa-miR-363	chrX	133131127	133131144	4		rs12846492	0.170253094519645	0.0306062899707089	NO		rs5977972	0.355748655627065	0.0139971152470359	NO		rs12846492	0.0484299236597197	0.0623468550840308	NO
hsa-miR-3651	chr9	94094633	94094647	17		rs10992308:rs10992312	0.279540241907242	0.0191411834091158	NO		rs556155	0.0216629154116898	0.0834541281535223	NO		rs556155	0.0994553963336286	0.0438694348838384	NO
hsa-miR-3653	chr22	28059222	28059238	34		rs16987328	0.00497286865028728	0.122242701460582	NO		rs16987328	0.0136156791192824	0.095710900639179	NO		rs8550	0.0482548694590528	0.0624411193634152	NO
hsa-miR-3656	chr11	118394918	118394928	62		rs568922	0.0394185955041897	0.0677200061128514	NO		rs682795	0.025346087208594	0.0793160803985663	NO		rs11217091	0.0186807658896233	0.0873612776178851	NO
hsa-miR-3663-3p	chr10	118917249	118917258	35		rs11593856:rs716183	0.00165635219073213	0.150873273877185	NO		rs363251	0.0233527776653003	0.0814739651983474	NO		rs2803827	0.0140034977661282	0.0949693517828365	NO
hsa-miR-3665	chr13	77170181	77170189	27		rs1053985:rs9600901	0.0231791069229799	0.0816706974628932	NO		rs6563019	0.0604278432046006	0.056604898894661	NO		rs10507873	0.013307842798641	0.096314699657091	NO
hsa-miR-3676	chr17	8031284	8031296	60		NA	NA	NA	NA		rs3027247	0.010571370826877	0.102391323466225	NO		NA	NA	NA	NA
hsa-miR-3679-5p	chr2	134601181	134601193	57		rs1257174	0.0184853181383392	0.087638845195233	NO		rs11675416	0.00407441560062301	0.127464517267741	NO		rs2593708	0.0565622821628804	0.0583155819667471	NO
hsa-miR-371-5p	chr19	58982754	58982765	49		NA	NA	NA	NA		rs2866112:rs4806773	0.00260531370002183	0.13913375535924	NO		NA	NA	NA	NA
hsa-miR-374b	chrX	73355121	73355138	5		rs5981594	0.15338967803738	0.0331264443760344	NO		rs6655556	0.0701380503648249	0.0527644402927881	NO		rs4892491	0.215140095798536	0.0250755711731105	NO
hsa-miR-374c	chrX	73355127	73355142	5		rs6655556	0.552973807427769	0.00580134073151494	NO		rs1151599	0.0880117818216192	0.0469634495950537	NO		rs1151599	0.228186787860575	0.0237151700156256	NO
hsa-miR-378b	chr3	10346950	10346964	80		rs26796	0.00993991452273132	0.104016356468379	NO		rs26802	0.00413438832210308	0.127082032339759	NO		rs725027	0.0169415175718718	0.0899407561507946	NO
hsa-miR-421	chrX	73354990	73355006	5		rs5981594	0.624309275750919	0.00395658752977378	NO		rs1151599	0.217571866372202	0.0248147995576014	NO		rs1151599	0.21070410883013	0.0255602308906882	NO
hsa-miR-423-3p	chr17	25468285	25468297	20		rs4470197	0.0362874384724601	0.0698870153892324	NO		rs140700	0.257026320505684	0.0210098851552482	NO		rs9890886	0.180465136210111	0.029212610403411	NO
hsa-miR-423-5p	chr17	25468247	25468261	20		rs4470197	0.0368596555058921	0.0694770991968741	NO		rs140700	0.249325681202911	0.0216952929132038	NO		rs4494608	0.015976708038055	0.0914887438567804	NO
hsa-miR-424	chrX	133508321	133508341	14		rs17251951	0.00473136734875726	0.123548375396564	NO		rs4345730	0.118281010481435	0.0395247191638271	NO		rs17251951	0.0348525568526611	0.070944578767421	NO
hsa-miR-425st	chr3	49032649	49032660	24		rs4974078	0.285373231215522	0.0186871209321355	NO		rs3087866:rs7100:rs9864243	0.460554254081393	0.00896003657001676	NO		rs4974078	0.520791521984547	0.00679186333168334	NO
hsa-miR-4261	chr2	10250225	10250238	66		rs2241113:rs6432066	0.0375365381775829	0.0690004954573568	NO		rs16855996	0.0407967732854058	0.0668213195956154	NO		rs4669564	0.0138068432670786	0.0953427736113425	NO
hsa-miR-4270	chr3	15512768	15512779	39		rs17485390	0.0520048517428363	0.0604948789171791	NO		rs17041167	0.0875159107211052	0.0471070043395022	NO		rs12495710	0.0729175715620801	0.0517667535701391	NO
hsa-miR-4271	chr3	49286599	49286613	32		rs11710434:rs3448:rs974495	0.0154229300981974	0.0924201271869995	NO		rs17650792	0.0883512713298719	0.0468656593695739	NO		rs17080528:rs1800668	0.0330567447598466	0.0723323856254539	NO
hsa-miR-4281	chr5	175989087	175989097	70		rs4868660	0.0178497852532306	0.0885622112814035	NO		rs4868651	0.0229717826538502	0.0819075069550586	NO		rs13160179	0.0365127123252095	0.0697248564433294	NO
hsa-miR-4284	chr7	72763596	72763610	41		rs12536661	0.0145441315125934	0.0939691617437163	NO		rs2884050	0.00764350921629509	0.110941547540354	NO		rs17145817	0.122664721803762	0.0386198770639484	NO
hsa-miR-4286	chr8	10561911	10561924	62		rs4840508	0.0261321698418115	0.0785118574922399	NO		rs11996321	0.0197143283667492	0.0859403025978601	NO		rs4275198	0.03093758391532	0.0740721462920923	NO
hsa-miR-4291	chr9	95621471	95621485	62		rs11792828	0.0457930799637614	0.0638052672332955	NO		rs10992979	0.0500576262699546	0.0614867687027592	NO		rs10117505	0.0483017329731476	0.0624158496028186	NO
hsa-miR-4298	chr11	1837289	1837301	53		NA	NA	NA	NA		rs2089910	0.0896581688679863	0.0464928799334673	NO		rs11822805	0.120425935758069	0.0390775345811595	NO
hsa-miR-4299	chr11	11634822	11634835	65		rs7103589	0.0666827008855377	0.0540638623256944	NO		rs6485128	0.00413292346492791	0.127091309219415	NO		rs6485128	0.0416923163513606	0.0662538290915351	NO
hsa-miR-4306	chr13	99093379	99093394	54		rs2793783	0.105721532673705	0.0423319681366759	NO		rs9517863	0.0135464736629975	0.0958454451150799	NO		rs2806280	0.0243214314811001	0.080403050335895	NO
hsa-miR-4310	chr15	39946017	39946031	59		rs28627803	0.00822931486481019	0.10899600452887	NO		rs16972193	0.00960635790089155	0.104916742063421	NO		rs1061354:rs1648830:rs1648835:rs1672466:rs16972136	0.000153253706705612	0.210884548049097	NO
hsa-miR-4313	chr15	73841629	73841640	28		rs1818174	0.00918713619216624	0.106093543088778	NO		rs1127649:rs4616261	0.0595501305198704	0.0569831770442876	NO		rs11637643	0.0815239406547465	0.0489128109062938	NO
hsa-miR-4317	chr18	6364372	6364386	52		rs4503883	0.00922422279338488	0.105987305105245	NO		rs636589	0.166405298246933	0.0311559904844337	NO		rs4324213:rs8083385	0.0251798212707754	0.0794894087539973	NO
hsa-miR-4323	chr19	47329482	47329495	9		rs11883412	0.166479278634155	0.0311452877358672	NO		rs16975663	0.0659992877967411	0.0543291668767251	NO		rs11883412	0.0654658903825203	0.0545382286626576	NO
hsa-miR-4327	chr21	30669499	30669511	49		rs1109852:rs2832766:rs2832816:rs915759	0.0230329918510984	0.0818373693376954	NO		rs2832754	0.0217317537746769	0.0833704684233644	NO		rs2832772	0.0847609126403599	0.0479205487952198	NO
hsa-miR-451	chr17	24212530	24212550	33		NA	NA	NA	NA		rs1109024:rs11651867:rs12948575:rs2242345:rs4262997:rs4794838:rs901975:rs9279:rs9895443	1.44519078886676e-05	0.267145273465508	YES		NA	NA	NA	NA
hsa-miR-454	chr17	54569967	54569986	25		rs12451431:rs7406766	0.391462656369984	0.0120648548769032	NO		rs7502947	0.224129848047573	0.0241282090636311	NO		rs8077052	0.370670081835629	0.0131586449403447	NO
hsa-miR-483-5p	chr11	2111955	2111968	75		rs7479065	0.236762618631898	0.0228699096054919	NO		rs7479065	0.0214145872008485	0.0837581631234227	NO		rs10840447	0.00634822603758719	0.115828633993095	NO
hsa-miR-484	chr16	15644666	15644680	20		rs17284411	0.0338586957048938	0.0717033961904474	NO		rs4781673	0.0527581414523887	0.0601213886605246	NO		rs4781680	0.136553546872583	0.0359692496346487	NO
hsa-miR-494	chr14	100565779	100565792	43		rs2400968	0.0247720245843325	0.079919468262902	NO		rs2145505	0.0509606454648621	0.0610219328480337	NO		rs2145505	0.0268062842378613	0.0778414218019285	NO
hsa-miR-500a	chrX	49659800	49659813	5		rs179824	0.629238144789196	0.00384526115069831	NO		rs151259	0.105969997934662	0.0422730272155907	NO		rs151259	0.459636064691189	0.00899661975685615	NO
hsa-miR-501-3p	chrX	49661127	49661141	5		rs10283986	0.021253119870976	0.0839577617908538	NO		rs10283986	0.00278009696376594	0.137443882974775	NO		rs12851084	0.540249957001256	0.00618020011464847	NO
hsa-miR-502-3p	chrX	49666004	49666018	5		rs10283986	0.13651771303772	0.0359757038731011	NO		rs10283986	0.0855146633648205	0.0476952258084678	NO		rs12851084	0.844223963079954	0.000637950778546008	NO
hsa-miR-503	chrX	133508035	133508051	14		rs17251951	0.015600596368678	0.0921177161884801	NO		rs17251951	0.0166590340592601	0.0903846467333923	NO		rs6529635	0.0230938776222208	0.0817677884469616	NO
hsa-miR-505	chrX	138834027	138834044	6		rs4581222	0.186581844509138	0.0284198946618881	NO		rs17256782	0.313639406523883	0.0166408329540154	NO		rs4336783	0.0162036857940358	0.0911163042519223	NO
hsa-miR-505st	chrX	138833990	138834008	6		rs5955268:rs7054064	0.0729848751391885	0.0517430910399622	NO		rs4336783	0.0362189285874124	0.0699365342733632	NO		rs4336783	0.00430885658295036	0.125999725405275	NO
hsa-miR-513b	chrX	146088271	146088288	13		rs5904723	0.327329326814146	0.0157326398913068	NO		rs12115908	0.183154432452745	0.0288603827004149	NO		rs2504169	0.328036909046053	0.0156870430539322	NO
hsa-miR-513c	chrX	146078931	146078948	14		rs5951956	0.081400950619708	0.0489513260140382	NO		rs5905021	0.0226133903154299	0.0823219949470665	NO		rs5951937	0.0894838368681027	0.0465422730005404	NO
hsa-miR-532-3p	chrX	49654558	49654571	6		rs12556180	0.0103185572154953	0.103030018642633	NO		rs12556180	0.000502600130770179	0.181322204795338	NO		rs179824	0.311959175470145	0.016755820041105	NO
hsa-miR-542-3p	chrX	133503090	133503110	14		rs17251951	0.120049420190275	0.0391554063893149	NO		rs17251951	0.0849693284235016	0.0478580351606642	NO		rs7889699	0.172584741276761	0.0302799316847167	NO
hsa-miR-542-5p	chrX	133503056	133503074	14		rs4830296	0.093595483689125	0.0454036346718009	NO		rs6638258	0.0789875914521025	0.0497197171259705	NO		rs4830296	0.0258499856961047	0.0787977069523005	NO
hsa-miR-551b	chr3	169752397	169752416	33		rs7642311	0.00515747264816538	0.121286260061423	NO		rs7642311	0.0103099765263894	0.10305196894245	NO		rs3906954	0.195125587784079	0.0273608345903158	NO
hsa-miR-564	chr3	44878404	44878417	24		rs17076998	0.166257764924926	0.0311773500562331	NO		rs17076998	0.181062993529697	0.029133794776737	NO		rs11711118	0.306418569830721	0.0171406840058939	NO
hsa-miR-574-3p	chr4	38546115	38546129	68		rs11725309:rs5743565	0.00610005319957382	0.116877194309593	NO		rs11725309:rs5743565	0.0206509760693132	0.0847158031326193	NO		rs17429619	0.122709686046773	0.0386107782504809	NO
hsa-miR-574-5p	chr4	38546078	38546094	68		rs13809	0.0122950126784496	0.098404630502754	NO		rs11944159:rs1472720	0.0855583674559366	0.0476822254160383	NO		rs13809	0.0662499786696937	0.0542315166970049	NO
hsa-miR-575	chr4	83893576	83893592	55		rs2135507	0.0299321645476698	0.074940325067316	NO		rs17354029	0.00616277483043384	0.11660825016047	NO		rs11732247	0.0437950992226408	0.0649689039572874	NO
hsa-miR-625	chr14	65007590	65007607	15		rs11851013:rs12434585	0.0115673942162847	0.100014981272509	NO		rs11851013:rs12434585	0.00365597394180027	0.130298870140071	NO		rs7140695:rs7158153	0.214702218829414	0.0251228922744807	NO
hsa-miR-628-5p	chr15	53452454	53452473	20		rs12440680	0.0712119071703069	0.052374172614856	NO		rs10518810:rs11732:rs16953240:rs3203152	0.0978014134135335	0.0442925245665734	NO		rs12440680	0.0601659352777879	0.0567171772563208	NO
hsa-miR-629	chr15	68158790	68158806	64		NA	NA	NA	NA		rs745636	0.000338365902847557	0.191259580561295	NO		NA	NA	NA	NA
hsa-miR-630	chr15	70666678	70666693	7		rs11856110	0.209905575028103	0.0256487353213016	NO		rs11856110	0.0586414627413316	0.0573809301729285	NO		rs12148733	0.290516807776722	0.0182962148884842	NO
hsa-miR-638	chr19	10690107	10690119	29		rs10775614	0.0578238875156954	0.0577443007891805	NO		rs1560734:rs4334414	0.0693858222758647	0.0530415523183026	NO		rs11085748	0.118041479311019	0.039575200845494	NO
hsa-miR-642b	chr19	50870085	50870097	40		rs36040835	0.00713442671734715	0.112756493572427	NO		rs4802262	0.062248935090725	0.055837890304224	NO		rs4802262	0.0177860218804916	0.0886566678902135	NO
hsa-miR-652	chrX	109185280	109185293	21		rs6567845	0.224727964170433	0.0240667641265154	NO		rs5942873	0.0800064096986193	0.0493923658311641	NO		rs1024429	0.145813648702313	0.0343608265242911	NO
hsa-miR-660	chrX	49664608	49664625	5		rs10283986	0.153818293442592	0.033058636118754	NO		rs10283986	0.12031267436042	0.0391009318435336	NO		rs7885457	0.26926221559478	0.0199705069326785	NO
hsa-miR-664	chr1	218440558	218440573	18		rs11547779:rs11805285	0.366659582560848	0.0133794215447758	NO		rs10779402	0.0941295803682121	0.0452596305445528	NO		rs6541127	0.153454094689857	0.0331162400644688	NO
hsa-miR-665	chr14	100411172	100411184	70		rs2400963	0.00948730318522517	0.10524566493164	NO		NA	NA	NA	NA		NA	NA	NA	NA
hsa-miR-671-5p	chr7	150566481	150566490	46		NA	NA	NA	NA		rs219249	0.00860588953982475	0.107816710752223	NO		NA	NA	NA	NA
hsa-miR-7-1st	chr9	85774552	85774569	27		rs4298563	0.0216707465435978	0.0834445974446613	NO		rs6559758	0.00152291851303389	0.15304037361213	NO		rs1572031	0.158724148359838	0.0322971325325865	NO
hsa-miR-720	chr3	165541854	165541865	26		rs16848120:rs9857988	0.0467677688314119	0.0632563635780639	NO		rs789324	0.193552709938927	0.027551775851674	NO		rs13059129:rs7611861	0.325434107438095	0.0158554042101513	NO
hsa-miR-744	chr17	11925960	11925972	23		rs10432016:rs10445266:rs9788973	0.0585675393565492	0.057413569068644	NO		rs2322123:rs757594	0.0070763654052929	0.112971602281552	NO		rs2322123:rs757594	0.0187560920207325	0.0872550799514665	NO
hsa-miR-762	chr16	30812784	30812794	31		rs1458201:rs35675346:rs7200879	0.10796186397641	0.0418057983498088	NO		rs8058961	0.129557431689992	0.0372657507993517	NO		rs11642733:rs11647243	0.105839903105538	0.0423038698381711	NO
hsa-miR-765	chr1	155172619	155172635	46		NA	NA	NA	NA		rs822430	0.0321482948154486	0.0730639106380752	NO		NA	NA	NA	NA
hsa-miR-766	chrX	118664799	118664814	31		rs12389896	0.121475544984989	0.0388618346584922	NO		rs5910643	0.0795235685192588	0.0495469557919192	NO		rs11798540:rs3088376	0.242926722794196	0.0222845072976107	NO
hsa-miR-769-5p	chr19	51214063	51214080	44		rs759623	0.0240396588397644	0.0807100680811978	NO		rs8111976	0.000174530804455873	0.207688325280286	YES		rs7252643	0.0603962855110678	0.0566184007352074	NO
hsa-miR-874	chr5	137011216	137011227	36		rs2905586	0.377575981450301	0.0127860810577171	NO		rs4371746	0.105310251125606	0.0424298588400259	NO		rs2189087	0.0608108806134204	0.0564415981165282	NO
hsa-miR-892b	chrX	144886457	144886474	25		rs7062671	0.278599484719053	0.0192155163405749	NO		rs5919957	0.211306963396447	0.025493671926279	NO		rs1339601	0.0460019821285238	0.0636866195901445	NO
hsa-miR-933	chr2	175740661	175740674	23		rs1982235	0.245994208561658	0.0219997614111926	NO		rs268189	0.233291864698699	0.0232075612494481	NO		rs6721193	0.0417120896482485	0.0662414401697379	NO
hsa-miR-939	chr8	145590198	145590209	33		rs12682512:rs7830832	0.275584474386351	0.0194558517591534	NO		rs2721195	0.0817500908871266	0.0488421498050126	NO		rs2272663	0.284723643727373	0.0187371138953808	NO
hsa-miR-940	chr16	2261818	2261828	34		rs155243	0.0248220011672087	0.0798663806074689	NO		rs323066	0.0707967803294116	0.0525243073647656	NO		rs26835	0.0492728518956334	0.0618977991585985	NO
hsa-miR-98	chrX	53599932	53599951	5		rs414960	0.36825827803668	0.013291018814853	NO		rs12850534:rs6638360	0.580213603042012	0.00504307458695915	NO		rs266786	0.513781905653756	0.00702217822911906	NO
hsa-miR-99a	chr21	16833296	16833313	39		rs13047709	0.105030025389056	0.0424967910060057	NO		rs2039241	0.0810630215272732	0.0490574666121549	NO		rs13047709	0.121160210447461	0.0389264249071265	NO
hsa-miR-99b	chr19	56887690	56887704	72		rs11084095	0.0188803781489865	0.0870807893846426	NO		rs11084095	0.00182231966917369	0.14840552414926	NO		rs2218888	0.0118228143005806	0.0994384626086926	NO
1 Number of cis-SNPs, i.e. SNPs lying within 200kb of the miRNA
2 cis-SNP most strongly associated with miRNA expression levels in a given condition
3 P-value observed for the cis-SNP most strongly associated with miRNA expression levels in a given condition
4 Effect size (r2) observed for the cis-SNP most strongly associated with miRNA expression levels in a given condition
NAs indicate miRNAs for which associations were not calculated in a given condition as the miRNA was expressed in fewer than 50% of samples

## Sheet: Table S3
Table S3. Results of BRIdGE analysis to identify genotype-infection interactions
miRNA	Posterior probability	Mean Bayes factor	Most associated SNP	Weight of evidence	Bayes factor	Most likely model1	PP Model 1	PP Model 2	PP Model 3	PP Model 4
hsa-miR-338-3p	1.000	5.349	rs4969258	0.9226	6.967	3	0.000	0	0.8129	0.1871
hsa-miR-451	0.9877	2.765	rs1109024	0.1037	3.305	4	0.0298	0	0.0484	0.9094
hsa-miR-326	0.9123	1.895	rs532751	0.8627	3.552	1	0.8173	0	0.0744	0.0204
hsa-miR-130b	0.8402	1.6	rs3788329	0.2409	2.691	4	0.0033	0	0.0249	0.8121
hsa-miR-1260	0.823	1.547	rs11159250	0.1759	2.746	1	0.6866	0	0.0617	0.0747
hsa-miR-532-3p	0.7302	1.312	rs12556180	0.7097	2.078	4	0.0115	0	0.0196	0.6992
hsa-miR-130a	0.5911	1.041	rs1424753	0.0847	1.869	4	0.0051	0	0.0251	0.561
hsa-miR-769-5p	0.5711	1.005	rs8111976	0.2678	2.319	4	0.0575	0	0.0187	0.495
hsa-miR-625	0.5498	0.967	rs11851013	0.1858	1.672	4	0.0142	0	0.0223	0.5133
hsa-miR-324-5p	0.4673	0.824	rs222835	0.2017	2.14	4	0.0141	0	0.0139	0.4393
hsa-miR-1271	0.4658	0.821	rs13170785	0.0882	1.545	1	0.2622	0	0.039	0.1646
hsa-let-7bst	0.4534	0.799	rs7291040	0.4269	2.472	4	0.0187	0	0.0154	0.4193
hsa-miR-152	0.3829	0.673	rs1010228	0.0299	1.134	4	0.0077	0	0.0148	0.3605
hsa-miR-501-3p	0.3433	0.599	rs10283986	0.2657	1.187	4	0.0171	0	0.0103	0.316
hsa-miR-132st	0.3376	0.588	rs9898364	0.1401	1.93	4	0.0741	0	0.0294	0.2342
hsa-miR-3196	0.284	0.479	rs4809500	0.0836	1.561	4	0.1226	0	0.0138	0.1476
hsa-miR-140-3p	0.2789	0.468	rs7200005	0.0577	1.182	1	0.1331	0	0.0265	0.1193
hsa-miR-342-3p	0.2646	0.437	rs1190950	0.0635	1.249	4	0.0341	0	0.0121	0.2184
hsa-miR-223	0.2511	0.406	rs606886	0.0409	0.822	1	0.213	0	0.0191	0.019
hsa-miR-345	0.249	0.401	rs3736952	0.0415	1.142	1	0.1272	0	0.0136	0.1083
hsa-miR-629	0.2484	0.4	rs745636	0.1386	1.953	4	0.0646	0	0.0195	0.1643
hsa-miR-3195	0.2207	0.333	rs1407959	0.024	0.96	1	0.1206	0	0.0163	0.0838
hsa-miR-7-1st	0.2174	0.324	rs6559758	0.1348	1.548	4	0.0225	0	0.0067	0.1883
hsa-miR-1290	0.2134	0.314	rs11261075	0.0706	1.697	4	0.0618	0	0.0104	0.1412
hsa-miR-1973	0.2075	0.299	rs10516627	0.0407	0.913	1	0.1064	0	0.0117	0.0894
hsa-miR-4327	0.2072	0.298	rs1109852	0.0117	0.74	4	0.0262	0	0.008	0.173
hsa-miR-1307	0.1816	0.227	rs11191642	0.0282	0.986	4	0.0097	0	0.0105	0.1614
hsa-miR-1305	0.1793	0.22	rs2726824	0.056	1.669	4	0.0177	0	0.0462	0.1154
hsa-miR-200c	0.1767	0.213	rs1044189	0.0262	0.798	4	0.0166	0	0.0393	0.1209
hsa-miR-1275	0.1722	0.199	rs2495962	0.0671	1.609	4	0.0646	0	0.0072	0.1004
hsa-miR-574-3p	0.1638	0.173	rs11725309	0.0232	1.156	4	0.0088	0	0.0058	0.1491
hsa-miR-99b	0.1557	0.147	rs11084095	0.0406	1.42	4	0.0443	0	0.0086	0.1028
hsa-miR-4284	0.153	0.138	rs2884050	0.019	0.843	4	0.0129	0	0.005	0.1351
hsa-let-7i	0.1457	0.113	rs7979878	0.0174	0.896	4	0.0283	0	0.0064	0.111
hsa-miR-342-5p	0.1408	0.095	rs1190950	0.0344	0.915	4	0.0116	0	0.0053	0.1239
hsa-miR-100	0.1381	0.085	rs6589913	0.053	1.261	4	0.0172	0	0.0042	0.1167
hsa-miR-21	0.1361	0.078	rs1292061	0.0254	0.78	4	0.0089	0	0.0038	0.1234
hsa-miR-20b	0.1295	0.053	rs5977971	0.0893	0.494	4	0.0104	0	0.003	0.116
hsa-miR-744	0.1283	0.049	rs2322123	0.0263	0.722	4	0.0231	0	0.0053	0.1
hsa-miR-3679-5p	0.1261	0.04	rs11675416	0.0611	1.481	4	0.0254	0	0.0045	0.0962
hsa-miR-148b	0.1224	0.025	rs2887875	0.0368	0.966	1	0.0637	0	0.0078	0.051
hsa-miR-20a	0.1209	0.019	rs9560769	0.0569	1.236	4	0.0268	0	0.0062	0.0879
hsa-miR-18a	0.1201	0.016	rs9560769	0.0241	0.862	4	0.0148	0	0.0073	0.0979
hsa-let-7f-1st	0.12	0.015	rs10993058	0.0318	0.929	1	0.0665	0	0.0084	0.045
hsa-miR-125a-5p	0.12	0.016	rs4801889	0.0282	1.244	4	0.0254	0	0.0066	0.0881
hsa-miR-15a	0.1187	0.01	rs2066549	0.017	0.37	4	0.0086	0	0.0047	0.1054
hsa-miR-340	0.1128	-0.015	rs42414	0.0653	1.361	4	0.0231	0	0.0037	0.086
hsa-miR-630	0.1112	-0.022	rs11856110	0.0491	0.468	4	0.0245	0	0.0035	0.0831
hsa-miR-665	0.1035	-0.057	rs2400963	0.0379	1.352	4	0.0251	0	0.0049	0.0734
hsa-miR-3676	0.1032	-0.058	rs11649742	0.0104	0.724	4	0.0224	0	0.0039	0.077
hsa-miR-148a	0.0972	-0.087	rs6954116	0.0182	0.765	4	0.0381	0	0.0077	0.0514
hsa-miR-371-5p	0.0966	-0.09	rs2866112	0.0236	0.989	4	0.0392	0	0.0057	0.0517
hsa-miR-4306	0.0946	-0.1	rs2806280	0.0142	0.808	4	0.037	0	0.0044	0.0532
hsa-miR-423-5p	0.0929	-0.109	rs4494608	0.0286	0.68	1	0.0513	0	0.0199	0.0216
hsa-miR-3653	0.0928	-0.109	rs16987328	0.0399	1.055	4	0.0141	0	0.0045	0.0743
hsa-miR-3127-5p	0.0895	-0.126	rs12473528	0.0128	0.177	4	0.0264	0	0.0025	0.0607
hsa-miR-338-5p	0.0873	-0.139	rs8064345	0.0149	0.747	4	0.0154	0	0.0054	0.0664
hsa-miR-141	0.0861	-0.145	rs759052	0.0431	0.969	4	0.0103	0	0.0029	0.0729
hsa-miR-4310	0.084	-0.157	rs28627803	0.0147	0.858	4	0.0171	0	0.0049	0.0621
hsa-miR-1225-3p	0.0834	-0.16	rs7187438	0.0218	0.92	4	0.0149	0	0.004	0.0645
hsa-miR-551b	0.083	-0.163	rs7642311	0.0158	0.637	4	0.0121	0	0.0049	0.066
hsa-miR-186	0.0811	-0.173	rs2300164	0.0098	0.442	4	0.014	0	0.0032	0.0639
hsa-miR-132	0.081	-0.174	rs4790852	0.0306	1.127	4	0.0251	0	0.0031	0.0528
hsa-miR-1225-5p	0.0806	-0.177	rs8050755	0.0153	0.764	4	0.0176	0	0.0025	0.0605
hsa-miR-22	0.0804	-0.178	rs3809800	0.0262	1.077	4	0.0112	0	0.0029	0.0664
hsa-miR-374b	0.0804	-0.177	rs6655556	0.0281	0.065	4	0.0139	0	0.0019	0.0647
hsa-miR-1914st	0.0803	-0.178	rs817318	0.0169	0.623	4	0.0153	0	0.0029	0.0621
hsa-miR-503	0.08	-0.18	rs17251951	0.047	0.735	4	0.0095	0	0.0019	0.0686
hsa-miR-142-3p	0.0799	-0.18	rs2680688	0.0051	0.297	4	0.0114	0	0.0037	0.0648
hsa-miR-513c	0.0793	-0.184	rs5905021	0.0265	0.486	4	0.0122	0	0.0016	0.0654
hsa-miR-628-5p	0.0792	-0.185	rs10518810	0.0075	0.094	4	0.0119	0	0.0025	0.0648
hsa-miR-29c	0.0789	-0.186	rs2745948	0.0148	0.741	4	0.0173	0	0.0026	0.059
hsa-miR-30b	0.0782	-0.191	rs7821456	0.0052	0.403	4	0.0123	0	0.0061	0.0597
hsa-miR-17st	0.0777	-0.194	rs9560769	0.0164	0.674	4	0.0275	0	0.0066	0.0436
hsa-miR-339-3p	0.0771	-0.197	rs10951737	0.0132	0.8	4	0.0248	0	0.0031	0.0492
hsa-miR-3651	0.0764	-0.201	rs556155	0.0294	0.614	4	0.0315	0	0.0033	0.0416
hsa-miR-197	0.0763	-0.202	rs12745189	0.0144	0.617	4	0.0187	0	0.0028	0.0548
hsa-miR-575	0.0761	-0.204	rs17354029	0.0179	0.909	4	0.024	0	0.0039	0.0482
hsa-miR-1915	0.0751	-0.21	rs12764850	0.0162	0.425	3	0.0194	0	0.0294	0.0263
hsa-miR-30d	0.0751	-0.21	rs7839969	0.0248	1.072	4	0.0214	0	0.0035	0.0501
hsa-miR-1246	0.075	-0.21	rs2044642	0.0092	0.491	4	0.0139	0	0.0037	0.0575
hsa-miR-4286	0.0746	-0.213	rs7827623	0.0049	0.393	4	0.0234	0	0.0028	0.0485
hsa-miR-22st	0.0745	-0.213	rs4790812	0.0133	0.777	4	0.029	0	0.003	0.0425
hsa-miR-26b	0.0745	-0.213	rs4552182	0.0061	0.288	4	0.0172	0	0.0019	0.0554
hsa-miR-378b	0.0739	-0.217	rs26802	0.0185	1.085	4	0.0176	0	0.004	0.0523
hsa-miR-150	0.073	-0.223	rs34486765	0.0104	0.543	4	0.0261	0	0.0046	0.0423
hsa-miR-1281	0.0719	-0.23	rs20551	0.007	0.098	4	0.013	0	0.0059	0.053
hsa-miR-4323	0.0716	-0.232	rs16975663	0.0231	0.231	4	0.0135	0	0.0024	0.0558
hsa-miR-181c	0.0715	-0.232	rs12610873	0.0108	0.464	1	0.0404	0	0.0052	0.0259
hsa-miR-193a-3p	0.0706	-0.239	rs315457	0.0077	0.531	4	0.011	0	0.0026	0.057
hsa-let-7e	0.0704	-0.24	rs11084095	0.006	0.544	4	0.013	0	0.0025	0.0549
hsa-miR-494	0.0696	-0.245	rs941714	0.0091	0.503	4	0.0106	0	0.0024	0.0566
hsa-miR-27a	0.0694	-0.247	rs2305777	0.0133	0.671	4	0.0126	0	0.0027	0.0542
hsa-miR-765	0.0694	-0.246	rs822430	0.0094	0.55	4	0.0152	0	0.0019	0.0523
hsa-miR-3663-3p	0.0693	-0.247	rs363251	0.0118	0.53	4	0.0131	0	0.0103	0.0459
hsa-miR-1539	0.0691	-0.248	rs8093249	0.0123	0.281	4	0.0197	0	0.003	0.0464
hsa-miR-4271	0.0684	-0.254	rs11710434	0.0065	0.232	4	0.0122	0	0.0045	0.0516
hsa-miR-212	0.0676	-0.259	rs4790852	0.0088	0.581	4	0.0178	0	0.0027	0.0471
hsa-miR-574-5p	0.0669	-0.264	rs13809	0.0038	0.321	4	0.0103	0	0.0027	0.0539
hsa-miR-193a-5p	0.0668	-0.264	rs17181735	0.0095	0.619	4	0.0209	0	0.0052	0.0407
hsa-miR-642b	0.0654	-0.274	rs36040835	0.0093	0.48	4	0.016	0	0.0102	0.0392
hsa-miR-146a	0.0653	-0.275	rs4921136	0.004	0.274	4	0.0188	0	0.0036	0.043
hsa-miR-107	0.0645	-0.28	rs303175	0.0081	0.48	4	0.0148	0	0.0023	0.0474
hsa-miR-150st	0.0645	-0.281	rs2914658	0.004	0.127	4	0.0125	0	0.0026	0.0494
hsa-miR-4299	0.0641	-0.284	rs6485128	0.0138	0.861	4	0.0211	0	0.0027	0.0403
hsa-miR-142-5p	0.064	-0.284	rs12451466	0.0057	0.336	4	0.0129	0	0.0024	0.0487
hsa-miR-361-3p	0.0638	-0.286	rs5967637	0.0077	0.177	4	0.0154	0	0.0018	0.0466
hsa-miR-129-3p	0.0637	-0.287	rs11037478	0.0157	0.685	4	0.0229	0	0.0031	0.0377
hsa-miR-29cst	0.0635	-0.288	rs2745952	0.0075	0.437	4	0.0201	0	0.006	0.0374
hsa-miR-320e	0.0634	-0.289	rs314666	0.0038	0.242	4	0.0219	0	0.0021	0.0394
hsa-miR-3162-5p	0.0631	-0.291	rs7116484	0.0075	-0.042	4	0.0244	0	0.0096	0.0291
hsa-miR-34ast	0.0622	-0.298	rs765617	0.0075	0.482	4	0.0133	0	0.0032	0.0457
hsa-miR-134	0.062	-0.299	rs7147503	0.0155	0.772	4	0.0118	0	0.0078	0.0425
hsa-miR-483-5p	0.0613	-0.304	rs7479065	0.0092	0.746	4	0.0134	0	0.0016	0.0464
hsa-miR-3141	0.0611	-0.306	rs4958760	0.0071	0.424	4	0.0117	0	0.0047	0.0448
hsa-miR-1249	0.0602	-0.313	rs9614616	0.0042	0.416	4	0.0136	0	0.003	0.0436
hsa-miR-185	0.06	-0.314	rs2531708	0.0057	0.611	4	0.0167	0	0.0036	0.0397
hsa-miR-15b	0.0594	-0.319	rs3851366	0.0058	-0.154	4	0.0087	0	0.0025	0.0482
hsa-miR-30e	0.0588	-0.323	rs729590	0.0046	0.24	4	0.0186	0	0.0027	0.0375
hsa-miR-1238	0.0584	-0.327	rs10416139	0.0062	0.374	4	0.0116	0	0.0029	0.0439
hsa-miR-34a	0.0581	-0.329	rs12402600	0.0079	0.505	4	0.0196	0	0.0034	0.0352
hsa-miR-4298	0.0579	-0.331	rs661348	0.0044	0.27	4	0.0121	0	0.0034	0.0423
hsa-miR-155st	0.0576	-0.333	rs2829783	0.0046	-0.105	4	0.0159	0	0.0018	0.0399
hsa-miR-3656	0.0576	-0.333	rs682795	0.0037	0.272	4	0.0156	0	0.0018	0.0402
hsa-miR-2861	0.0575	-0.334	rs1537034	0.0111	0.651	4	0.0148	0	0.0022	0.0405
hsa-miR-195	0.0573	-0.335	rs2920422	0.0035	0.117	4	0.0178	0	0.002	0.0375
hsa-miR-4313	0.0567	-0.34	rs1127649	0.0045	0.006	4	0.0176	0	0.003	0.0361
hsa-miR-340st	0.0565	-0.342	rs248221	0.0098	0.509	4	0.0157	0	0.0076	0.0331
hsa-miR-1280	0.0564	-0.342	rs1010786	0.0054	0.156	4	0.0125	0	0.0018	0.0422
hsa-miR-1202	0.0562	-0.345	rs17086812	0.0029	0.109	4	0.0132	0	0.0023	0.0406
hsa-miR-638	0.056	-0.346	rs1560734	0.0075	0.246	4	0.0127	0	0.002	0.0413
hsa-miR-191st	0.0557	-0.349	rs11552724	0.0038	-0.121	4	0.0098	0	0.0023	0.0436
hsa-miR-423-3p	0.0552	-0.353	rs1042173	0.0037	-0.228	4	0.008	0	0.0028	0.0444
hsa-miR-374c	0.0551	-0.353	rs1151599	0.0181	-0.139	4	0.0181	0	0.0015	0.0355
hsa-miR-4261	0.055	-0.354	rs16855996	0.0041	0.335	4	0.0129	0	0.0023	0.0398
hsa-let-7g	0.0544	-0.359	rs730050	0.0075	0.298	4	0.0111	0	0.0016	0.0416
hsa-miR-23a	0.0542	-0.361	rs10422746	0.0041	0.153	4	0.0143	0	0.0044	0.0355
hsa-let-7b	0.0532	-0.369	rs11090796	0.0084	0.526	4	0.0119	0	0.0016	0.0398
hsa-miR-1228	0.0532	-0.37	rs17119494	0.005	0.19	4	0.0165	0	0.0019	0.0348
hsa-miR-23ast	0.0532	-0.37	rs897790	0.0024	-0.09	4	0.0168	0	0.0019	0.0345
hsa-miR-720	0.0532	-0.369	rs16848120	0.0039	-0.086	4	0.0091	0	0.0022	0.0419
hsa-miR-1288	0.0531	-0.371	rs7210224	0.0145	0.296	4	0.0116	0	0.0034	0.038
hsa-miR-1207-5p	0.0526	-0.375	rs1909457	0.0018	0.135	4	0.0137	0	0.0029	0.0361
hsa-miR-23b	0.0526	-0.375	rs4744436	0.0064	-0.209	4	0.0151	0	0.0025	0.035
hsa-miR-3665	0.0519	-0.381	rs6563019	0.0059	0.109	4	0.0171	0	0.0061	0.0287
hsa-miR-671-5p	0.0516	-0.384	rs219249	0.0064	0.375	4	0.0186	0	0.0035	0.0294
hsa-miR-125a-3p	0.0515	-0.384	rs3794978	0.0061	0.548	4	0.0144	0	0.0022	0.0348
hsa-miR-191	0.0506	-0.393	rs11552724	0.0027	-0.268	4	0.0145	0	0.0021	0.034
hsa-miR-940	0.0506	-0.393	rs323066	0.0049	0.122	4	0.0129	0	0.002	0.0357
hsa-miR-29b-1st	0.0498	-0.4	rs972283	0.0062	0.452	4	0.0129	0	0.0035	0.0334
hsa-miR-424	0.0498	-0.4	rs17251951	0.0096	0.03	4	0.0162	0	0.0034	0.0301
hsa-miR-2116st	0.0489	-0.408	rs4775136	0.0064	0.318	4	0.0156	0	0.0045	0.0288
hsa-miR-484	0.0486	-0.411	rs4781673	0.0109	0.24	4	0.0106	0	0.0025	0.0355
hsa-miR-151-5p	0.0485	-0.412	rs10090774	0.0069	-0.028	4	0.0118	0	0.0015	0.0352
hsa-miR-155	0.0481	-0.415	rs1893650	0.003	-0.297	4	0.0134	0	0.0018	0.0329
hsa-miR-29a	0.0481	-0.415	rs205773	0.0031	0.15	4	0.0122	0	0.0021	0.0339
hsa-miR-502-3p	0.0481	-0.415	rs10283986	0.023	-0.036	4	0.0087	0	0.001	0.0384
hsa-miR-106b	0.048	-0.417	rs12705074	0.0064	0.406	4	0.011	0	0.0017	0.0354
hsa-miR-664	0.0474	-0.422	rs10779402	0.0077	0.045	4	0.0118	0	0.0014	0.0343
hsa-let-7d	0.0472	-0.424	rs10821325	0.0048	0.086	4	0.0125	0	0.0039	0.0309
hsa-miR-193b	0.0471	-0.425	rs925339	0.0051	0.072	4	0.0142	0	0.0018	0.0311
hsa-miR-210	0.047	-0.426	rs17585	0.0028	0.056	4	0.0155	0	0.0022	0.0293
hsa-miR-4317	0.0468	-0.428	rs4324213	0.0022	-0.04	4	0.0152	0	0.0035	0.028
hsa-miR-762	0.0467	-0.429	rs11642733	0.0035	-0.061	4	0.0177	0	0.0035	0.0255
hsa-miR-126	0.0463	-0.433	rs7852910	0.0017	-0.049	4	0.0105	0	0.0016	0.0343
hsa-miR-25	0.0452	-0.444	rs1569055	0.0028	0.042	4	0.0158	0	0.0015	0.0279
hsa-miR-149	0.0451	-0.445	rs10165842	0.003	0.141	4	0.0126	0	0.0026	0.03
hsa-miR-4291	0.045	-0.446	rs10992979	0.0028	0.143	4	0.0129	0	0.0017	0.0304
hsa-miR-1274a_v16.0	0.0448	-0.448	rs3913723	0.0085	0.246	4	0.0128	0	0.0016	0.0305
hsa-miR-21st	0.0448	-0.448	rs8064505	0.0026	-0.252	4	0.0096	0	0.0013	0.0339
hsa-miR-542-5p	0.0445	-0.451	rs4830296	0.0081	-0.043	4	0.0168	0	0.0023	0.0254
hsa-miR-4281	0.0432	-0.464	rs4868651	0.0035	0.287	4	0.0138	0	0.0027	0.0268
hsa-miR-933	0.043	-0.466	rs1153672	0.0023	-0.378	4	0.0124	0	0.0015	0.0291
hsa-miR-1274b_v16.0	0.0429	-0.467	rs726260	0.0025	0.181	4	0.0109	0	0.0014	0.0307
hsa-miR-19a	0.0428	-0.469	rs9560769	0.0064	0.247	4	0.0129	0	0.0014	0.0284
hsa-miR-425st	0.0427	-0.469	rs3087866	0.0024	-0.337	4	0.01	0	0.0012	0.0315
hsa-miR-1825	0.0426	-0.47	rs13037236	0.0025	-0.336	4	0.0129	0	0.0013	0.0285
hsa-miR-564	0.0424	-0.473	rs17076998	0.0047	-0.046	4	0.0095	0	0.0012	0.0318
hsa-miR-99a	0.0424	-0.473	rs2039241	0.0032	-0.004	4	0.012	0	0.0014	0.0289
hsa-miR-1268	0.0416	-0.481	rs7402159	0.0416	-0.481	4	0.0104	0	0.0016	0.0296
hsa-miR-4270	0.0416	-0.481	rs17041167	0.0043	0.124	4	0.0116	0	0.0014	0.0286
hsa-miR-505st	0.0409	-0.49	rs4336783	0.0114	-0.265	4	0.0149	0	0.0038	0.0222
hsa-miR-33bst	0.0407	-0.492	rs11654526	0.0095	0.273	4	0.0135	0	0.0015	0.0257
hsa-miR-1260b	0.0401	-0.498	rs6483496	0.002	-0.19	4	0.0097	0	0.0028	0.0276
hsa-miR-454	0.0401	-0.498	rs9903295	0.0022	-0.355	4	0.0113	0	0.0011	0.0277
hsa-miR-188-5p	0.0399	-0.5	rs12556180	0.0163	-0.11	4	0.0092	0	0.0011	0.0296
hsa-miR-28-3p	0.0399	-0.5	rs6790135	0.0023	-0.069	4	0.01	0	0.0013	0.0287
hsa-miR-874	0.0392	-0.509	rs4371746	0.0022	-0.204	4	0.0111	0	0.001	0.0271
hsa-miR-939	0.0391	-0.51	rs2721195	0.0027	-0.153	4	0.0107	0	0.001	0.0273
hsa-miR-362-3p	0.0389	-0.512	rs10283986	0.0134	-0.274	4	0.0135	0	0.0044	0.021
hsa-miR-135ast	0.0383	-0.519	rs3752819	0.0023	-0.287	4	0.0089	0	0.0011	0.0284
hsa-miR-223st	0.0381	-0.522	rs5965073	0.0032	-0.398	4	0.0073	0	0.003	0.0278
hsa-let-7c	0.038	-0.522	rs17210156	0.0025	-0.143	4	0.0093	0	0.0012	0.0275
hsa-miR-505	0.0378	-0.525	rs17256782	0.0105	-0.304	4	0.0078	0	0.0011	0.0289
hsa-miR-660	0.0374	-0.529	rs10283986	0.0172	-0.169	4	0.007	0	0.0008	0.0296
hsa-miR-500a	0.0372	-0.532	rs151259	0.0173	-0.165	4	0.0099	0	0.0007	0.0266
hsa-miR-27b	0.0367	-0.538	rs4744436	0.0056	-0.278	4	0.0086	0	0.0012	0.0269
hsa-miR-3125	0.0367	-0.538	rs11684315	0.0018	-0.202	4	0.0088	0	0.0012	0.0267
hsa-miR-18b	0.0363	-0.543	rs12846492	0.0179	-0.249	4	0.0086	0	0.0008	0.0269
hsa-miR-1234	0.0356	-0.552	rs2272662	0.0021	-0.241	4	0.0106	0	0.0009	0.0241
hsa-miR-221	0.0351	-0.558	rs17144771	0.006	0.181	4	0.009	0	0.0009	0.0252
hsa-miR-542-3p	0.034	-0.572	rs17251951	0.0058	-0.192	4	0.007	0	0.0007	0.0263
hsa-miR-652	0.0321	-0.599	rs5942873	0.0043	-0.152	4	0.0071	0	0.0006	0.0243
hsa-miR-766	0.0318	-0.603	rs5910643	0.0037	-0.041	4	0.0081	0	0.0008	0.0229
hsa-miR-222	0.0316	-0.605	rs5905473	0.0021	-0.285	4	0.0096	0	0.0008	0.0213
hsa-miR-221st	0.0315	-0.607	rs7050010	0.0023	-0.24	4	0.0086	0	0.0008	0.0221
hsa-miR-421	0.031	-0.614	rs1151599	0.0081	-0.496	4	0.0105	0	0.0008	0.0198
hsa-miR-363	0.0296	-0.635	rs12846492	0.0115	-0.444	4	0.006	0	0.0008	0.0228
hsa-miR-513b	0.0292	-0.641	rs12115908	0.0039	-0.405	4	0.0079	0	0.0006	0.0206
hsa-miR-892b	0.0277	-0.664	rs7062671	0.0023	-0.353	4	0.008	0	0.0006	0.0191
hsa-miR-23c	0.0276	-0.666	rs12387893	0.0033	-0.51	4	0.0065	0	0.0007	0.0204
hsa-miR-98	0.0228	-0.751	rs12840724	0.0055	-0.67	4	0.0056	0	0.0005	0.0168

## Sheet: Table S4
Table S4. Overlap of miR-eQTLs with Chromatin Marks identified for Human Monocytes
Regulatory Motif	Overlapping miR-eQTLs
H2az	miR-1260, miR-582-5p, miR-451
H3k04me1	miR-1260, miR-582-5p, miR-769-5p
H3k04me2	miR-1260, miR-769-5p, miR-451
H3k04me3	miR-1260, miR-582-5p, miR-769-5p, miR-451
H3k09ac	miR-769-5p, miR-451
H3k27ac	miR-582-5p, miR-451
H3k27me3	miR-1260
H3k36me3	miR-130b, let-7i, miR-451
H3k79me2	miR-130b, miR-769-5p, miR-451
H4k20me1	miR-451

## Sheet: Table S5
Table S5. Significantly correlated miRNA-mRNA pairs in non-infected and MTB-infected samples
Non-infected samples				MTB-infected samples				Fold Change upon MTB-infection
miRNA	mRNA	R value		miRNA	mRNA	R value		miRNA	mRNA	R value
hsa-miR-103a	ACP5	0.654852197390648		hsa-miR-1228	AAK1	0.592729052620769		hsa-miR-132	AADAT	-0.642335707695282
hsa-miR-425	ACP5	0.623851733146921		hsa-miR-1234	AAK1	0.565541798345822		hsa-miR-212	AADAT	-0.61724402565048
hsa-miR-4327	ACSL5	0.617518022116523		hsa-miR-1238	AAK1	0.574201609361812		hsa-miR-155	ABCA6	-0.64766841162518
hsa-miR-210	ADM	0.698003975311015		hsa-miR-155	AAK1	-0.66192486718683		hsa-miR-222	ABCA6	-0.569888345156073
hsa-miR-210	ALDOC	0.784222020999602		hsa-miR-940	AAK1	0.56565016267354		hsa-miR-421	ABCA6	0.563557294618766
hsa-miR-210	ANKRD37	0.767309498329938		hsa-miR-155	AATF	0.584624679993208		hsa-miR-155	ABCB10	0.629984915541578
hsa-miR-212	ANXA3	0.607670099025397		hsa-miR-155	ABCA2	-0.606276287092435		hsa-miR-212	ABP1	0.667530645801441
hsa-miR-3663-3p	ARL5A	0.63017996519129		hsa-miR-155	ABCA6	-0.574687408881043		hsa-miR-132	ABTB2	0.593022720897912
hsa-miR-762	ARL5A	0.657427766521442		hsa-miR-212	ABCA6	-0.608569126974614		hsa-miR-155	ABTB2	0.665113247870886
hsa-miR-3663-3p	ARV1	0.646212757202414		hsa-miR-27a	ABCA6	0.547301234143275		hsa-miR-212	ABTB2	0.596553785613912
hsa-miR-103a	ATP6AP1	0.611200031474766		hsa-miR-378	ABCA6	0.725840148548211		hsa-miR-222	ABTB2	0.60816714239322
hsa-miR-210	BEND5	0.676493377864845		hsa-miR-421	ABCA6	0.556124761428403		hsa-miR-132	ACAA2	-0.578593130623096
hsa-miR-221	BHLHE22	0.68289056639997		hsa-miR-200c	ABCA9	0.539172155925742		hsa-miR-3663-3p	ACAA2	0.613320169209838
hsa-miR-210	BNIP3	0.742733559776027		hsa-miR-146a	ABCB4	-0.649689983333969		hsa-miR-212	ACACB	-0.600201800660974
hsa-miR-210	BNIP3L	0.727621445381635		hsa-miR-155	ABCB4	-0.68556174338427		hsa-miR-3663-3p	ACAD11	0.625245068298377
hsa-miR-551b	C16orf58	-0.6548006183491		hsa-miR-222	ABCB4	-0.595984589901918		hsa-miR-193b	ACADVL	0.565752834304684
hsa-miR-765	C1orf31	0.644878840343777		hsa-miR-1228	ABCB9	0.564288573090119		hsa-miR-3663-3p	ACAT2	-0.563817189399723
hsa-miR-221	C1QB	-0.612468863982904		hsa-miR-1238	ABCB9	0.552697277841761		hsa-miR-132	ACE	-0.606848944100545
hsa-miR-210	C3orf70	0.612102565752804		hsa-miR-1280	ABCB9	0.556343526911238		hsa-miR-155	ACE	-0.64916631547183
hsa-miR-378	C6orf145	0.60856986650786		hsa-miR-155	ABCB9	-0.674001114955667		hsa-miR-212	ACE	-0.655140142983304
hsa-miR-93	C6orf223	-0.616446651993173		hsa-miR-940	ABCB9	0.538905383866522		hsa-miR-155	ACOT7	-0.600274297472168
hsa-miR-221	CBX4	0.61031163043967		hsa-miR-155	ABHD10	-0.636263799405659		hsa-miR-212	ACOT7	-0.587282697422751
hsa-miR-551b	CCND1	0.633155762300686		hsa-miR-23b	ABHD14A	-0.553163017574091		hsa-miR-3663-3p	ACP6	0.618703582771747
hsa-miR-210	CD300A	0.657289218748549		hsa-miR-1238	ABHD2	0.586348703240996		hsa-miR-155	ACSF2	-0.577496224027893
hsa-miR-155	CD33	-0.627587405208028		hsa-miR-1280	ABHD2	0.549657399336942		hsa-miR-222	ACSF2	-0.562943602896616
hsa-miR-221	CD33	-0.630566020613988		hsa-miR-1281	ABHD2	0.54640437088899		hsa-miR-3663-3p	ACSF2	0.655958907650694
hsa-miR-210	CERCAM	0.618100042762537		hsa-miR-155	ABHD2	-0.542499984470885		hsa-miR-3663-3p	ACSL5	0.615024478599054
hsa-miR-155	CGN	0.686618307901433		hsa-miR-940	ABHD2	0.549314407878958		hsa-miR-155	ACTR1A	0.622837797545034
hsa-miR-221	CITED2	-0.607660384683447		hsa-miR-155	ABI1	0.721395217757676		hsa-miR-155	ADAM15	-0.753184163067842
hsa-miR-320a	CITED4	-0.614265759623682		hsa-miR-155	ABI3	-0.604826485300008		hsa-miR-212	ADAM15	-0.594019382786416
hsa-miR-551b	CITED4	0.645470549621972		hsa-miR-155	ABL1	-0.763142386726513		hsa-miR-222	ADAM15	-0.613706448600184
hsa-miR-221	CKB	0.60687117828216		hsa-miR-222	ABL1	-0.624954686710754		hsa-miR-132	ADAM23	-0.594814743712943
hsa-miR-320a	CKB	-0.611309983749146		hsa-miR-505	ABP1	0.555715930682454		hsa-miR-155	ADAM23	-0.622250017868272
hsa-miR-155	CNTNAP1	0.674963684601309		hsa-miR-155	ABR	-0.615353435272031		hsa-miR-212	ADAM23	-0.639661522315519
hsa-miR-221	CNTNAP1	0.607153599533143		hsa-miR-1228	ABTB1	-0.602883729536188		hsa-miR-155	ADCY3	-0.566167981372756
hsa-miR-221	CXCR7	0.632912346219019		hsa-miR-1234	ABTB1	-0.581099844112219		hsa-miR-155	ADM	0.632691856491751
hsa-miR-155	CXorf40B	0.665362747514583		hsa-miR-1238	ABTB1	-0.582515494626766		hsa-miR-4284	ADO	-0.574272934538438
hsa-miR-221	CXorf40B	0.620801715244021		hsa-miR-155	ABTB1	0.562940874068403		hsa-miR-155	ADRM1	0.564310412257191
hsa-miR-762	DARS2	-0.615368026301925		hsa-miR-940	ABTB1	-0.591154306646587		hsa-miR-155	AGPAT1	-0.591606070884147
hsa-miR-210	DDIT4	0.622034529712971		hsa-miR-155	ABTB2	0.725920970500765		hsa-miR-212	AHCTF1	0.612320166736888
hsa-miR-423-5p	DDX58	0.606867177669953		hsa-miR-193b	ABTB2	0.572556205363499		hsa-miR-155	AHCY	-0.636314595876207
hsa-miR-551b	DPM1	0.614049302059302		hsa-miR-26a	ABTB2	0.545080869110208		hsa-miR-132	AHCYL1	-0.674925671197315
hsa-miR-93	EHBP1	0.627884903010277		hsa-miR-27a	ACACB	0.547012791524863		hsa-miR-155	AHCYL1	-0.563706065529264
hsa-miR-210	ENO2	0.64790263539871		hsa-miR-29a	ACADM	-0.553987884916654		hsa-miR-212	AHCYL1	-0.714332630292965
hsa-miR-210	ERO1L	0.672696533913239		hsa-miR-155	ACAT1	-0.540256996417888		hsa-miR-222	AIF1	-0.574119958874941
hsa-miR-155	EVL	-0.640643347241651		hsa-miR-193b	ACAT1	-0.557607687284504		hsa-miR-155	AKAP11	-0.60689661615875
hsa-miR-221	EVL	-0.622490258291169		hsa-miR-212	ACAT2	0.565563211116246		hsa-miR-181b	AKIRIN2	-0.577258777631306
hsa-miR-103a	FAM108C1	-0.625744356503892		hsa-miR-132	ACE	-0.555482319716773		hsa-miR-155	AKR1A1	-0.580918030277046
hsa-miR-221	FAM108C1	0.631020453847697		hsa-miR-185	ACE	0.55149987747719		hsa-miR-212	AKR1A1	-0.567163444219293
hsa-miR-155	FAM131C	0.641292688938547		hsa-miR-212	ACE	-0.614983105601094		hsa-miR-1234	AKR1B1	-0.563904003267045
hsa-miR-221	FAM131C	0.66795898494894		hsa-miR-378	ACE	0.622193750836938		hsa-miR-193b	AKR1B1	0.600396047168505
hsa-miR-551b	FAM46C	0.626124934183742		hsa-miR-155	ACER3	-0.717513984521282		hsa-miR-3663-3p	AKR7A3	0.58887400614107
hsa-miR-221	FCGRT	-0.618335783855213		hsa-miR-1228	ACN9	0.540828268166024		hsa-miR-132	ALCAM	0.574946538694111
hsa-miR-320a	FCGRT	0.641532320400411		hsa-miR-155	ACN9	-0.605427655590749		hsa-miR-212	ALCAM	0.588177725641644
hsa-miR-221	FERMT2	0.623686902120951		hsa-miR-361-5p	ACOT4	0.563497716022695		hsa-miR-132	ALDH6A1	-0.585043963526767
hsa-miR-155	FGL2	-0.640243317545532		hsa-miR-103a	ACOT7	-0.555954615199065		hsa-miR-155	ALDH6A1	-0.609521030758812
hsa-miR-106b	FLJ22662	0.615095136330047		hsa-miR-132	ACOT7	-0.60216748326015		hsa-miR-212	ALDH6A1	-0.593252338213296
hsa-miR-155	FSTL1	0.613391837447001		hsa-miR-193b	ACOT7	-0.590113162930341		hsa-miR-155	ALDH7A1	-0.598754055558352
hsa-miR-221	FSTL1	0.658338926970155		hsa-miR-212	ACOT7	-0.548272740193989		hsa-miR-212	ALDH7A1	-0.601625572393163
hsa-miR-221	G0S2	-0.639642102509325		hsa-miR-25	ACOT7	-0.57850736985878		hsa-miR-132	ALDH9A1	-0.587988249342753
hsa-miR-93	G0S2	0.630267901396929		hsa-miR-92a	ACOT7	-0.556757858825039		hsa-miR-155	ALDH9A1	-0.565507007419411
hsa-miR-221	GABPB1	0.648529968271071		hsa-miR-93	ACOT7	-0.614338807087055		hsa-miR-212	ALDH9A1	-0.567567168346135
hsa-miR-210	GAPDH	0.755358760324616		hsa-miR-129-3p	ACOT9	0.549749027496095		hsa-miR-155	ALG1	-0.580979441692103
hsa-miR-210	GBE1	0.62055331359029		hsa-miR-29a	ACOT9	0.612267963872475		hsa-miR-132	ALG6	-0.587133678124476
hsa-miR-20b	GEM	0.613124439576979		hsa-miR-186	ACP6	-0.608699850318241		hsa-miR-212	ALG6	-0.616148172307512
hsa-miR-744	GNG10	0.636140519276498		hsa-miR-221	ACP6	0.540378222570615		hsa-miR-132	ALMS1	-0.590460669273536
hsa-miR-762	GNG10	0.672757884789329		hsa-miR-27a	ACP6	0.616189225903886		hsa-miR-155	ALMS1	-0.593437085590411
hsa-miR-210	GPI	0.666863065154427		hsa-miR-421	ACP6	0.596571250366616		hsa-miR-212	ALMS1	-0.640234623965028
hsa-miR-106b	GRIN1	-0.672080833317005		hsa-miR-1228	ACPL2	-0.574784857428315		hsa-miR-212	ALPK1	-0.563278835527733
hsa-miR-551b	HAGH	0.626646905695941		hsa-miR-1234	ACPL2	-0.54031490847088		hsa-miR-155	AMICA1	-0.632575909831715
hsa-miR-221	HEXB	-0.606819361227939		hsa-miR-155	ACPL2	0.717030496728229		hsa-miR-3663-3p	AMT	0.619067596075105
hsa-miR-210	HK2	0.626849517798546		hsa-miR-200c	ACPL2	-0.561842621305035		hsa-miR-155	ANAPC13	-0.583460312368371
hsa-miR-210	HYAL3	0.608382068549798		hsa-miR-103a	ACSF2	-0.577047571170073		hsa-miR-155	ANG	-0.562956155870499
hsa-miR-551b	IFT140	0.612146627659856		hsa-miR-212	ACSF2	-0.55124591853233		hsa-miR-222	ANG	-0.577256364430564
hsa-miR-155	IGFBP3	0.606862917154919		hsa-miR-221	ACSF2	0.63979433607082		hsa-miR-132	ANGEL1	-0.563377391755275
hsa-miR-221	IGFBP3	0.682442537236964		hsa-miR-330-3p	ACSF2	-0.57716582070767		hsa-miR-155	ANGEL1	-0.607154597868019
hsa-miR-222	IGFBP3	0.632558318035832		hsa-miR-378	ACSF2	0.567989615708886		hsa-miR-212	ANGEL1	-0.606609911001257
hsa-miR-103a	IKZF4	0.621836053758292		hsa-miR-155	ACSL1	0.631156582627992		hsa-miR-3663-3p	ANGEL1	0.646740387922619
hsa-miR-221	IL23A	-0.669765799053792		hsa-miR-186	ACSL1	0.541524556638407		hsa-miR-4271	ANGEL1	0.591818998687054
hsa-miR-4271	IL23A	0.631251387563313		hsa-miR-212	ACSL1	0.544910024960542		hsa-miR-155	ANKLE2	0.575867813941168
hsa-miR-155	IL2RA	0.639588780666384		hsa-miR-378	ACSL1	-0.566139473417667		hsa-miR-3663-3p	ANKRA2	0.662770040142046
hsa-miR-221	IL2RA	0.661706699846446		hsa-miR-155	ACSL4	0.599347374067148		hsa-miR-4271	ANKRA2	0.670846166267679
hsa-miR-221	INSM1	0.702295127892449		hsa-miR-222	ACSL4	0.579315239698355		hsa-miR-762	ANKRA2	0.604195516234017
hsa-miR-551b	IRF8	-0.632737971871932		hsa-miR-212	ACSL5	-0.544338799308148		hsa-miR-132	ANKRD22	0.60153205021805
hsa-miR-155	ITGAM	-0.607737038327621		hsa-miR-29a	ACTA2	-0.540551301856948		hsa-miR-212	ANKRD22	0.597758443870771
hsa-miR-92a	JAG2	-0.621052469413416		hsa-miR-155	ACTN1	-0.565066894830103		hsa-miR-132	ANKRD39	0.578558872872278
hsa-miR-551b	KIF15	0.649664403362332		hsa-miR-449a	ACTN1	-0.59986970348138		hsa-miR-155	ANKRD39	0.613450103692734
hsa-miR-210	KISS1R	0.617701658755046		hsa-miR-1228	ACTR2	0.573785975368369		hsa-miR-132	ANO6	-0.58167039944188
hsa-miR-150	KLRB1	0.649170393074707		hsa-miR-155	ACTR2	-0.686101178276289		hsa-miR-155	ANO6	-0.712923472328499
hsa-miR-155	LAPTM5	-0.675413725348972		hsa-miR-146a	ACVR1B	0.601059730416763		hsa-miR-212	ANO6	-0.605156342908816
hsa-miR-210	LDHA	0.653560590783595		hsa-miR-1228	ADA	-0.596691660945927		hsa-miR-222	ANO6	-0.585574777141944
hsa-miR-221	LRP8	0.648761366107109		hsa-miR-1234	ADA	-0.551319131421972		hsa-miR-132	ANXA3	0.645533206469951
hsa-miR-212	MARCKSL1	0.607020174368786		hsa-miR-1238	ADA	-0.597854822655789		hsa-miR-155	ANXA3	0.647229234299171
hsa-miR-551b	MED20	-0.647558090626153		hsa-miR-1280	ADA	-0.585789304169878		hsa-miR-212	ANXA3	0.67421311608969
hsa-miR-221	MGST2	-0.655169876341019		hsa-miR-1281	ADA	-0.556827783509323		hsa-miR-132	ANXA5	-0.642724511384401
hsa-miR-103a	MMP7	0.646987243404102		hsa-miR-146a	ADA	0.552195176016496		hsa-miR-212	ANXA5	-0.679958946705225
hsa-miR-210	MPI	0.616164970669817		hsa-miR-155	ADA	0.776437054159333		hsa-miR-155	ANXA6	0.759744115734987
hsa-miR-221	MRPS6	0.684114222427713		hsa-miR-940	ADA	-0.58071369849973		hsa-miR-222	ANXA6	0.631781721004289
hsa-miR-155	NBL1	0.62395684206618		hsa-miR-155	ADAD2	-0.652828304042789		hsa-miR-1915	AP1G2	0.601339120170796
hsa-miR-210	NDRG1	0.630932692856397		hsa-miR-186	ADAD2	-0.577474805927942		hsa-miR-155	AP2A2	-0.583052966283594
hsa-miR-221	NEK6	0.62533854097168		hsa-miR-222	ADAD2	-0.615833226977726		hsa-miR-155	AP2S1	-0.587927319160107
hsa-miR-155	NID1	0.619964807277409		hsa-miR-1228	ADAM15	0.551143985431282		hsa-miR-155	AP3B2	0.5892287677114
hsa-miR-221	NID1	0.622595851711158		hsa-miR-1238	ADAM15	0.549050063957188		hsa-miR-155	APEH	-0.619594576851694
hsa-miR-222	NID1	0.624850822050225		hsa-miR-155	ADAM15	-0.647552599822682		hsa-miR-27b	APEH	0.566983188092665
hsa-miR-551b	NIPA1	0.64811802048258		hsa-miR-132	ADAM23	-0.595891575045365		hsa-miR-155	APEX1	-0.595691886203582
hsa-miR-3663-3p	NMNAT3	0.622348503101231		hsa-miR-212	ADAM23	-0.692644318705874		hsa-miR-155	APH1A	-0.639056192465976
hsa-miR-3665	OGFOD1	-0.612124072825553		hsa-miR-378	ADAM23	0.595447204568424		hsa-miR-222	APOL2	0.578066631424836
hsa-miR-1973	OLFML2B	-0.66018768832013		hsa-miR-505	ADAM23	-0.565092660374522		hsa-miR-155	APOL4	-0.618637733732697
hsa-miR-210	P4HA1	0.663854260034456		hsa-miR-93	ADAM23	-0.551244456639365		hsa-miR-155	ARAP2	0.655969715735554
hsa-miR-551b	PANX2	0.674439366842895		hsa-miR-155	ADAMDEC1	0.675340327728956		hsa-miR-212	ARHGAP22	0.615520926871672
hsa-miR-210	PFKFB4	0.611024199755264		hsa-miR-222	ADAMDEC1	0.601901454996715		hsa-miR-155	ARHGAP9	-0.624377208385902
hsa-miR-210	PGA5	0.655200886510912		hsa-miR-361-5p	ADAMDEC1	-0.569095933414973		hsa-miR-212	ARHGEF2	0.574817067671471
hsa-miR-210	PGAM4	0.611053525486355		hsa-miR-1228	ADCK1	0.545041233631776		hsa-miR-155	ARL5A	-0.57765701663191
hsa-miR-210	PGK1	0.727334207093214		hsa-miR-29a	ADCK1	-0.576946928788223		hsa-miR-3663-3p	ARL5A	0.576488206375915
hsa-miR-210	PGM1	0.656383887541057		hsa-miR-155	ADCK2	-0.650511249575626		hsa-miR-155	ARL8B	0.582801643554235
hsa-miR-212	PHF16	0.6208174935229		hsa-miR-181c	ADCK2	-0.566011661296375		hsa-miR-3663-3p	ARL8B	-0.565497648740914
hsa-miR-155	PLEKHG1	0.609635321347511		hsa-miR-155	ADCY6	-0.575437632984676		hsa-miR-132	ARMC10	-0.594927603235051
hsa-miR-769-5p	PLEKHG1	-0.608332048216194		hsa-miR-1228	ADCY7	0.590518002222382		hsa-miR-132	ARMC7	-0.609890731879835
hsa-miR-210	PLOD2	0.643369100347838		hsa-miR-1238	ADCY7	0.559293023878969		hsa-miR-212	ARMC7	-0.582871638254767
hsa-miR-210	PNCK	0.60908750629632		hsa-miR-1280	ADCY7	0.59469033606478		hsa-miR-132	ARMCX3	-0.622090877679343
hsa-miR-155	PPAP2B	-0.637580455293524		hsa-miR-1281	ADCY7	0.558091164775474		hsa-miR-212	ARMCX3	-0.620885571601463
hsa-miR-210	PPFIA4	0.692776520282767		hsa-miR-129-3p	ADCY7	-0.545712652719664		hsa-miR-155	ARPP19	0.563397490200181
hsa-miR-221	PRRX1	0.70906028605511		hsa-miR-155	ADCY7	-0.778456209573225		hsa-miR-155	ARV1	-0.588648993279634
hsa-miR-221	PTPRK	0.614927131521363		hsa-miR-940	ADCY7	0.558835253946004		hsa-miR-3663-3p	ARV1	0.609107495822043
hsa-miR-551b	RAB11FIP5	0.635702946623535		hsa-miR-212	ADM	0.568601725906982		hsa-miR-146a	ASAP1	-0.582262376523034
hsa-miR-106b	RAB20	0.670004387119826		hsa-miR-29a	ADO	-0.586000317858647		hsa-miR-27b	ASB6	0.586043206601955
hsa-miR-4327	RCN2	0.618053035430527		hsa-miR-197	ADORA2B	0.539190173901708		hsa-miR-155	ASGR2	-0.708550195085065
hsa-miR-212	REL	0.609359268361852		hsa-miR-155	ADORA3	-0.73907827475018		hsa-miR-132	ASMTL	0.587474533251841
hsa-miR-762	RIN2	-0.606865151512948		hsa-miR-185	ADORA3	0.538651262621552		hsa-miR-212	ASMTL	0.62387899198563
hsa-miR-221	RNASET2	-0.611513291236953		hsa-miR-186	ADORA3	-0.575462647462131		hsa-miR-155	ATF4	0.586695202720966
hsa-miR-93	RNF130	0.612168874987292		hsa-miR-25	ADORA3	-0.54881402375934		hsa-miR-155	ATP11C	0.570218499590904
hsa-miR-142-3p	RQCD1	-0.606902974950376		hsa-miR-26a	ADORA3	-0.606743914567619		hsa-miR-212	ATP11C	0.599130782740354
hsa-miR-762	RRM2B	0.614343284569038		hsa-miR-505	ADORA3	-0.631919049081466		hsa-miR-132	ATP1B3	0.603272672044119
hsa-miR-551b	SEMA4F	0.665603900331987		hsa-miR-155	ADPGK	0.570868525013573		hsa-miR-155	ATP1B3	0.663337665065319
hsa-miR-155	SIGLEC10	-0.647826557823952		hsa-miR-454	ADRB2	0.554384142770839		hsa-miR-212	ATP1B3	0.660741354842965
hsa-miR-155	SIL1	0.640478063766154		hsa-miR-132	ADRM1	0.651036592076951		hsa-miR-222	ATP1B3	0.582309330225407
hsa-miR-762	SLC15A4	-0.609538086690755		hsa-miR-212	ADRM1	0.670041541489279		hsa-miR-155	ATP2A3	-0.590107738091894
hsa-miR-762	SLC19A1	-0.628253118361708		hsa-miR-378	ADRM1	-0.595923319924661		hsa-miR-155	ATP5F1	-0.632357773438893
hsa-miR-762	SLC25A12	0.620064808570799		hsa-miR-155	AEBP2	0.60863925941261		hsa-miR-222	ATP5F1	-0.601516019801733
hsa-miR-155	SLC27A3	-0.70181034872418		hsa-miR-26a	AEBP2	0.621953805044485		hsa-miR-3663-3p	ATP5F1	0.588421809217473
hsa-miR-210	SLC2A1	0.714710719135575		hsa-miR-129-3p	AEN	0.564504574681374		hsa-miR-155	ATP5H	-0.589394862233141
hsa-miR-210	SLC2A14	0.607166652759762		hsa-miR-27a	AEN	-0.554879247299538		hsa-miR-222	ATP5H	-0.576687554115736
hsa-miR-210	SLC2A3	0.654491277259007		hsa-miR-1275	AFF1	-0.580774638523231		hsa-miR-155	ATP5J	-0.583133902184851
hsa-miR-212	SLCO5A1	0.640079541825555		hsa-miR-155	AFF1	-0.663534642364229		hsa-miR-212	ATP5J	-0.600014923317142
hsa-miR-320a	SPG21	0.623528197371719		hsa-miR-221	AFF3	-0.565830186933779		hsa-miR-155	ATP6AP1	-0.601578947357119
hsa-miR-210	SPP1	0.665419691473546		hsa-miR-212	AGBL5	-0.586593892995792		hsa-miR-132	ATP6AP2	-0.566108343765309
hsa-miR-155	ST3GAL1	0.606805007300837		hsa-miR-221	AGBL5	0.664830765228213		hsa-miR-155	ATP6AP2	-0.662095025511289
hsa-miR-155	STAT2	-0.61939422593439		hsa-miR-155	AGPAT1	-0.695038591285069		hsa-miR-212	ATP6AP2	-0.628587879246972
hsa-miR-221	STAT2	-0.678055567362351		hsa-miR-186	AGPAT1	-0.602128395952991		hsa-miR-222	ATP6AP2	-0.638430451427462
hsa-miR-4271	SUOX	0.659034758867281		hsa-miR-222	AGPAT1	-0.555559097108128		hsa-miR-155	ATP6V1A	-0.613998460838097
hsa-miR-551b	TANC2	0.613721463455634		hsa-miR-29a	AGPAT4	0.683966033938437		hsa-miR-212	ATP6V1A	-0.608761592729572
hsa-miR-551b	TMC5	0.61150084049489		hsa-miR-146a	AGPAT9	-0.551926977456475		hsa-miR-132	ATP6V1E1	0.632634241666598
hsa-miR-762	TMEM2	-0.620497219898341		hsa-miR-155	AGPAT9	-0.758552982906728		hsa-miR-212	ATP6V1E1	0.680803859521715
hsa-miR-210	TMEM45A	0.678962834215084		hsa-miR-222	AGPAT9	-0.629139642863619		hsa-miR-3663-3p	ATP6V1F	0.593534925948615
hsa-miR-155	TNFSF18	0.660323980545757		hsa-miR-186	AGRN	0.541683263853076		hsa-miR-155	ATP6V1G1	0.591945367251394
hsa-miR-155	TNFSF4	0.673522327572427		hsa-miR-186	AHCY	-0.546163124710469		hsa-miR-212	ATP6V1G1	0.575733922428474
hsa-miR-221	TNFSF4	0.662171527353313		hsa-miR-421	AHCYL1	0.552130091127077		hsa-miR-1915	ATPIF1	0.620674743935206
hsa-miR-155	TSPAN13	0.613209191614087		hsa-miR-155	AHNAK	-0.611909101836004		hsa-miR-3663-3p	ATPIF1	0.630272012007553
hsa-miR-221	TSPAN13	0.685640836381806		hsa-miR-186	AIDA	0.597349778951553		hsa-miR-3665	ATPIF1	0.610752635584031
hsa-miR-210	TUBB3	0.631867930793936		hsa-miR-186	AIF1	-0.561030709885979		hsa-miR-132	AVEN	0.596080975661887
hsa-miR-551b	TUFT1	0.677362441166117		hsa-miR-155	AIFM1	-0.663019865901312		hsa-miR-155	AVEN	0.630069440018614
hsa-miR-155	UPB1	0.609733705797514		hsa-miR-186	AIFM1	-0.579024998003591		hsa-miR-212	AVEN	0.621028958199569
hsa-miR-210	VLDLR	0.686073409311674		hsa-miR-449a	AIFM1	-0.55880953294046		hsa-miR-155	B3GNTL1	-0.673789385229102
hsa-miR-210	WDR54	0.713496000675849		hsa-miR-7	AIFM1	-0.585379214093676		hsa-miR-212	BAI1	0.571332813389751
hsa-miR-210	ZNF395	0.666484212701693		hsa-miR-26a	AIM1	0.563900861096389		hsa-miR-155	BAIAP2L1	0.612128801758253
hsa-miR-101	ZNF664	0.622936294982343		hsa-miR-155	AIP	0.575440002598157		hsa-miR-155	BATF	0.617326375802745
				hsa-miR-155	AKAP11	-0.69058643483325		hsa-miR-222	BATF	0.685831735184595
				hsa-miR-200c	AKAP11	0.541457840273224		hsa-miR-148b	BCDIN3D	0.563468624111513
				hsa-miR-1228	AKIRIN2	0.634351790815731		hsa-miR-212	BCL2	0.569193858764571
				hsa-miR-1234	AKIRIN2	0.556638604724637		hsa-miR-155	BCL2L1	0.627578413740427
				hsa-miR-1238	AKIRIN2	0.579466785963702		hsa-miR-27b	BCL2L2	-0.56577063432622
				hsa-miR-1281	AKIRIN2	0.573424350385444		hsa-miR-132	BCL9	-0.566424335722576
				hsa-miR-155	AKIRIN2	-0.79396180132916		hsa-miR-155	BCL9	-0.592401251216204
				hsa-miR-1825	AKIRIN2	0.544076527631597		hsa-miR-212	BCL9L	0.565175633040675
				hsa-miR-222	AKIRIN2	-0.597283501053203		hsa-miR-155	BHLHE22	0.73089664976654
				hsa-miR-940	AKIRIN2	0.581777551218445		hsa-miR-222	BHLHE22	0.684078115889851
				hsa-miR-155	AKNA	0.549593782712983		hsa-miR-155	BIRC2	0.568704701491863
				hsa-miR-146a	AKR1B1	0.609385485116767		hsa-miR-132	BIRC3	0.566415531307588
				hsa-miR-766	AKR1B1	-0.609651370092156		hsa-miR-155	BIRC3	0.607007342664958
				hsa-miR-155	AKT3	0.635095919168505		hsa-miR-212	BIRC3	0.595929276928359
				hsa-miR-155	ALAS1	0.646597081050293		hsa-miR-3663-3p	BIVM	0.581756746705524
				hsa-miR-132	ALCAM	0.621434657241888		hsa-miR-155	BRPF3	0.621797997235518
				hsa-miR-212	ALCAM	0.649619423380416		hsa-miR-129-3p	BTF3L4	-0.563440051041828
				hsa-miR-155	ALDH1A2	0.677588223934106		hsa-miR-155	BTF3L4	-0.638753227792185
				hsa-miR-766	ALDH1L2	0.585945794084783		hsa-miR-421	BTF3L4	0.595247295093512
				hsa-miR-1228	ALDH3A2	0.577773508203172		hsa-miR-212	BTG1	0.656057056870864
				hsa-miR-1234	ALDH3A2	0.539604055951366		hsa-miR-155	BTK	-0.576875701706416
				hsa-miR-1238	ALDH3A2	0.561897305122089		hsa-miR-132	C10orf104	0.577718573508856
				hsa-miR-1280	ALDH3A2	0.541170847700158		hsa-miR-212	C10orf104	0.654435786414417
				hsa-miR-1281	ALDH3A2	0.598426226720957		hsa-miR-132	C10orf105	-0.68048986256739
				hsa-miR-155	ALDH3A2	-0.681077801611916		hsa-miR-155	C10orf105	-0.663626200931896
				hsa-miR-1825	ALDH3A2	0.592114674780042		hsa-miR-212	C10orf105	-0.729175431638787
				hsa-miR-940	ALDH3A2	0.576109225758199		hsa-miR-155	C10orf11	-0.696567659089263
				hsa-miR-378	ALDH5A1	0.538757919218025		hsa-miR-222	C10orf11	-0.631009151452903
				hsa-miR-23b	ALDH6A1	-0.571478096971821		hsa-miR-1915	C10orf125	-0.563364653056133
				hsa-miR-330-3p	ALDH6A1	-0.548360789058239		hsa-miR-3663-3p	C10orf125	-0.585331334150548
				hsa-miR-212	ALDH9A1	-0.57920555687422		hsa-miR-3663-3p	C10orf76	-0.632551992271972
				hsa-miR-221	ALDH9A1	0.593776419131336		hsa-miR-762	C10orf76	-0.588049110097827
				hsa-miR-155	ALG1	-0.600831334283735		hsa-miR-762	C11orf1	0.571423703407761
				hsa-miR-155	ALG2	0.603975585949364		hsa-miR-155	C11orf21	-0.579792400732177
				hsa-let-7c	ALG6	-0.568433733079538		hsa-miR-4271	C11orf54	0.579424222014389
				hsa-miR-29a	ALG6	-0.539439220145638		hsa-miR-132	C12orf41	0.581651356864494
				hsa-miR-155	ALKBH5	-0.784531769074909		hsa-miR-129-3p	C12orf5	-0.57769574419212
				hsa-miR-186	ALKBH5	-0.540092011151689		hsa-miR-129-3p	C12orf65	0.563232156911404
				hsa-miR-222	ALKBH5	-0.649886991518436		hsa-miR-132	C13orf27	0.571899183333336
				hsa-miR-146a	ALKBH7	0.554816754271875		hsa-miR-212	C13orf27	0.581676533706411
				hsa-miR-1307	ALMS1	-0.539148816495271		hsa-miR-155	C14orf102	0.585621282778
				hsa-miR-212	ALMS1	-0.581235455885366		hsa-miR-132	C14orf109	-0.601644097926825
				hsa-miR-221	ALMS1	0.604292843815456		hsa-miR-212	C14orf109	-0.595405707728097
				hsa-miR-27a	ALMS1	0.574255209435385		hsa-miR-155	C14orf145	0.563903523649925
				hsa-miR-378	ALMS1	0.688326907646051		hsa-miR-132	C14orf4	-0.679086336681352
				hsa-miR-1307	ALOX15	-0.562091792860118		hsa-miR-155	C14orf4	-0.590120201690382
				hsa-miR-155	ALOX15	-0.639743919947129		hsa-miR-212	C14orf4	-0.709646223141685
				hsa-miR-186	ALOX15	-0.57832459660343		hsa-miR-132	C14orf93	-0.572958994709168
				hsa-miR-1275	ALOX15B	0.562226402149782		hsa-miR-212	C14orf93	-0.623363551231962
				hsa-miR-155	ALOX15B	0.751887600440893		hsa-miR-3663-3p	C14orf93	0.59076133676577
				hsa-miR-186	ALOX15B	0.575125878082869		hsa-miR-148b	C15orf17	-0.567778396098613
				hsa-miR-222	ALOX15B	0.60662679175828		hsa-miR-155	C15orf17	0.565631121988183
				hsa-miR-361-5p	ALOX15B	-0.562794714942355		hsa-miR-155	C15orf38	-0.620803342321443
				hsa-miR-146a	ALOX5AP	-0.548175438210238		hsa-miR-212	C15orf39	0.592797416909211
				hsa-miR-155	ALOX5AP	-0.768271736544965		hsa-miR-155	C15orf48	0.646034876557736
				hsa-miR-222	ALOX5AP	-0.667732513178114		hsa-miR-155	C16orf61	-0.611552644503645
				hsa-miR-1228	ALS2CR4	-0.559981654012521		hsa-miR-155	C16orf7	-0.636684276903212
				hsa-miR-1234	ALS2CR4	-0.566670065646097		hsa-miR-132	C16orf75	-0.583399169376284
				hsa-miR-1238	ALS2CR4	-0.568909198373926		hsa-miR-212	C16orf75	-0.597634342775285
				hsa-miR-132	AMMECR1L	0.551776735770452		hsa-miR-4271	C16orf75	0.584664297127706
				hsa-miR-212	AMMECR1L	0.567597035075298		hsa-miR-362-5p	C17orf61	0.571314267361931
				hsa-miR-155	AMOTL2	-0.654088801773681		hsa-miR-148b	C17orf63	-0.568680084488381
				hsa-miR-1825	AMOTL2	0.545826985788025		hsa-miR-1915	C18orf54	-0.577583747013104
				hsa-miR-200c	AMOTL2	0.552643606419648		hsa-miR-3663-3p	C18orf54	-0.639334703061027
				hsa-miR-4310	AMOTL2	0.571910878177477		hsa-miR-3665	C18orf54	-0.566052980875663
				hsa-miR-92a	AMY2B	-0.540877044700966		hsa-miR-4271	C18orf54	-0.569366200763062
				hsa-miR-93	AMY2B	-0.545762290542078		hsa-miR-155	C1orf144	0.616045775547477
				hsa-miR-155	ANAPC13	-0.604890092284113		hsa-miR-3663-3p	C1orf144	-0.568512868433571
				hsa-miR-155	ANG	-0.582038501456321		hsa-miR-155	C1orf162	-0.67562441513054
				hsa-miR-186	ANG	-0.579277464661808		hsa-miR-222	C1orf162	-0.600762623386892
				hsa-miR-27a	ANG	0.544264555300374		hsa-miR-3663-3p	C1orf162	0.566137197559799
				hsa-miR-212	ANGEL1	-0.608568883003191		hsa-miR-155	C1orf53	0.564005986547033
				hsa-miR-221	ANGEL1	0.589441741671536		hsa-miR-155	C1orf54	-0.623535270904126
				hsa-miR-378	ANGEL1	0.549113446200906		hsa-miR-222	C1orf54	-0.572163779369977
				hsa-miR-155	ANKLE2	0.544898986153036		hsa-miR-132	C1QA	-0.606677106115561
				hsa-miR-185	ANKLE2	-0.591932330397709		hsa-miR-155	C1QA	-0.665728300195743
				hsa-miR-505	ANKLE2	0.545807099892372		hsa-miR-212	C1QA	-0.643290725069642
				hsa-miR-92a	ANKRA2	-0.567258756645001		hsa-miR-222	C1QA	-0.56839096946799
				hsa-miR-210	ANKRD37	0.753935108073039		hsa-miR-132	C1QB	-0.668084866793349
				hsa-miR-378	ANKRD39	-0.556343048782193		hsa-miR-155	C1QB	-0.677410128087682
				hsa-miR-1280	ANKRD46	-0.548540401664416		hsa-miR-212	C1QB	-0.717354480082874
				hsa-miR-222	ANKRD6	-0.5969068896929		hsa-miR-155	C1QC	-0.685844330058635
				hsa-miR-210	ANKZF1	0.632105067247607		hsa-miR-222	C1QC	-0.595230651285429
				hsa-miR-186	ANO10	-0.566372238570041		hsa-miR-155	C20orf27	-0.61920498059949
				hsa-miR-454	ANO10	-0.56673653163511		hsa-miR-3663-3p	C2orf56	0.568352152323924
				hsa-miR-1275	ANO6	-0.575106356265957		hsa-miR-3663-3p	C2orf64	0.643068246359562
				hsa-miR-155	ANO6	-0.690592454221591		hsa-miR-4271	C2orf64	0.585786892725674
				hsa-miR-454	ANO6	-0.539518568003886		hsa-miR-155	C3orf14	0.637129959618481
				hsa-miR-7	ANO6	-0.584869171912452		hsa-miR-132	C3orf18	0.628686503639514
				hsa-miR-1228	ANXA6	-0.561321180137107		hsa-miR-155	C3orf18	0.635300840323059
				hsa-miR-1275	ANXA6	0.550537211135659		hsa-miR-212	C3orf18	0.687078548081564
				hsa-miR-155	ANXA6	0.702342040499949		hsa-miR-132	C3orf58	-0.572212875085381
				hsa-miR-378	ANXA6	-0.557077774955283		hsa-miR-3663-3p	C4orf14	0.601872323115614
				hsa-miR-505	ANXA6	0.619359157777092		hsa-miR-155	C4orf34	-0.643991506880326
				hsa-miR-155	ANXA7	0.567638238903802		hsa-miR-212	C5	-0.605251065403089
				hsa-miR-155	AP1B1	-0.741625258239652		hsa-miR-155	C5orf32	0.603453831003543
				hsa-miR-186	AP1B1	-0.632694604903354		hsa-miR-132	C5orf39	-0.645881030389629
				hsa-miR-361-5p	AP1B1	0.552976731499261		hsa-miR-212	C5orf39	-0.612370031226079
				hsa-miR-505	AP1B1	-0.546623075158368		hsa-miR-3663-3p	C6orf145	-0.627157351456975
				hsa-miR-7	AP1B1	-0.543497568023259		hsa-miR-155	C6orf223	0.637801348100347
				hsa-miR-155	AP1G1	-0.573749611839		hsa-miR-212	C6orf223	0.578802784036415
				hsa-miR-155	AP1M1	0.55810253529869		hsa-miR-155	C7orf23	-0.575762626904226
				hsa-miR-575	AP1S1	-0.541568820020854		hsa-miR-132	C8orf83	-0.587769819208272
				hsa-miR-186	AP2A1	-0.54798938908489		hsa-miR-155	C8orf83	-0.578946519019927
				hsa-miR-221	AP2A2	0.546905664205323		hsa-miR-212	C8orf83	-0.629602717879452
				hsa-miR-378	AP2A2	0.562590275152507		hsa-miR-3663-3p	C9orf24	0.617180480325384
				hsa-miR-155	AP2M1	-0.57135105065572		hsa-miR-132	C9orf91	0.592847654022869
				hsa-miR-361-5p	AP2M1	0.546468446578099		hsa-miR-155	C9orf91	0.71963008694354
				hsa-miR-7	AP2M1	-0.615651402018318		hsa-miR-212	C9orf91	0.67964241420651
				hsa-miR-155	AP2S1	-0.772938046691867		hsa-miR-155	C9orf95	0.644795575071786
				hsa-miR-186	AP2S1	-0.557139071225625		hsa-miR-155	C9orf98	0.58237737739333
				hsa-miR-1228	AP3D1	0.550896612752959		hsa-miR-132	CA11	-0.686234342171634
				hsa-miR-1238	AP3D1	0.574464190484074		hsa-miR-155	CA11	-0.632178049443014
				hsa-miR-1281	AP3D1	0.53923102499571		hsa-miR-212	CA11	-0.729370837674994
				hsa-miR-155	AP3D1	-0.653891164246137		hsa-miR-193b	CAMLG	0.574345530975873
				hsa-miR-1280	AP4B1	0.56997715448612		hsa-miR-155	CASP3	0.571920887796841
				hsa-miR-129-3p	AP4E1	-0.583603028787589		hsa-miR-132	CASP9	-0.571268327069259
				hsa-miR-29a	AP4E1	-0.612543324060906		hsa-miR-1915	CASP9	0.569103731654983
				hsa-miR-1228	APBA3	-0.550339721998487		hsa-miR-212	CASP9	-0.571523572278659
				hsa-miR-155	APBA3	0.555818084189496		hsa-miR-3663-3p	CASP9	0.598325953109973
				hsa-miR-940	APBA3	-0.555130396934669		hsa-miR-762	CAST	-0.587673436128917
				hsa-miR-155	APCDD1	-0.639916425106448		hsa-miR-132	CASZ1	0.588871642662631
				hsa-miR-146a	APCDD1L	0.547797429656464		hsa-miR-155	CASZ1	0.674281772673083
				hsa-miR-212	APEX1	-0.544538658144816		hsa-miR-212	CASZ1	0.658479475659567
				hsa-miR-1275	APH1A	-0.541860488129562		hsa-miR-222	CASZ1	0.588488188370898
				hsa-miR-155	APH1A	-0.608900784202676		hsa-miR-1307	CBARA1	-0.593920087633455
				hsa-miR-155	APIP	0.581107780519842		hsa-miR-155	CBARA1	-0.616992030206365
				hsa-miR-1275	APITD1	0.580452599997596		hsa-miR-222	CBARA1	-0.575449242641425
				hsa-miR-155	APITD1	0.784664349957817		hsa-miR-155	CBX4	0.579352105644854
				hsa-miR-185	APITD1	-0.557746002130639		hsa-miR-222	CBX4	0.615403228331943
				hsa-miR-378	APITD1	-0.545344355927447		hsa-miR-3663-3p	CBX7	0.624218701547333
				hsa-miR-505	APITD1	0.61778799610967		hsa-miR-155	CCBL2	0.658618113908813
				hsa-miR-155	APOB48R	-0.543982568181338		hsa-miR-222	CCBL2	0.5977401515953
				hsa-let-7i	APOBEC3C	-0.558942861419044		hsa-miR-1234	CCDC104	-0.574676316871412
				hsa-miR-103a	APOBEC3C	-0.584623972243563		hsa-miR-212	CCDC14	-0.563800336277347
				hsa-miR-186	APOBEC3F	0.640564606205189		hsa-miR-3663-3p	CCDC14	0.566026561951034
				hsa-miR-361-5p	APOBEC3F	-0.577763016607285		hsa-miR-3663-3p	CCDC151	0.588487794617486
				hsa-miR-186	APOBEC3G	0.65050533307752		hsa-miR-155	CCDC28B	0.577963628454516
				hsa-miR-222	APOBEC3G	0.625721957343551		hsa-miR-212	CCDC28B	0.569320146695407
				hsa-miR-361-5p	APOBEC3G	-0.595866942916641		hsa-miR-212	CCDC41	0.61137442365015
				hsa-miR-7	APOBEC3G	0.590416343810845		hsa-miR-155	CCDC50	0.581321102168777
				hsa-miR-186	APOBEC3H	0.54942124941929		hsa-miR-155	CCDC90B	0.604444795823271
				hsa-miR-155	APOL1	0.54868010777289		hsa-miR-132	CCL14	-0.583093244602219
				hsa-miR-222	APOL1	0.631861334319305		hsa-miR-212	CCL14	-0.573037021872281
				hsa-miR-27b	APOL1	-0.548813717694655		hsa-miR-212	CCL17	0.589074896603581
				hsa-miR-361-5p	APOL1	-0.60087637725185		hsa-miR-132	CCL22	0.647679221945811
				hsa-miR-222	APOL2	0.560072859375917		hsa-miR-155	CCL22	0.624817923619594
				hsa-miR-7	APOL2	0.570117946383558		hsa-miR-212	CCL22	0.620379730984311
				hsa-miR-222	APOL3	0.627140106899949		hsa-miR-222	CCL22	0.578379641744421
				hsa-miR-155	APOL4	-0.589564830716887		hsa-miR-132	CCL26	-0.571022761175129
				hsa-miR-155	APOO	0.604443053416035		hsa-miR-1915	CCL3L3	-0.600483228678079
				hsa-miR-186	APRT	-0.555519887942205		hsa-miR-3663-3p	CCL3L3	-0.577891736655701
				hsa-miR-155	AQP3	-0.721271211065779		hsa-miR-3665	CCL3L3	-0.590610910075446
				hsa-miR-505	AQP3	-0.54545438617389		hsa-miR-155	CCM2	0.593213349642691
				hsa-miR-1228	AQP9	-0.569941625565775		hsa-miR-155	CCNB1IP1	-0.640999173483366
				hsa-miR-1234	AQP9	-0.544000131180273		hsa-miR-155	CCR1	-0.594801316202392
				hsa-miR-155	AQP9	0.81043240195899		hsa-miR-212	CCR1	-0.588423654134993
				hsa-miR-186	AQP9	0.557638240321278		hsa-miR-146a	CCR7	0.569820444875211
				hsa-miR-222	AQP9	0.550109013908808		hsa-miR-132	CCT3	0.570998627789941
				hsa-miR-940	AQP9	-0.567901418081099		hsa-miR-212	CCT3	0.58889405022351
				hsa-miR-1275	ARAP1	-0.563533846457308		hsa-miR-155	CD200	0.680115778295405
				hsa-miR-155	ARAP1	-0.608661467912228		hsa-miR-222	CD200	0.615738757730605
				hsa-miR-1307	ARAP3	-0.615394392121364		hsa-miR-132	CD209	-0.586295601008901
				hsa-miR-155	ARAP3	-0.625761406655453		hsa-miR-155	CD209	-0.727633289677433
				hsa-miR-155	ARFRP1	0.612842148493329		hsa-miR-212	CD209	-0.647910094717307
				hsa-miR-505	ARHGAP15	-0.604716498443044		hsa-miR-222	CD209	-0.608026387397754
				hsa-miR-1228	ARHGAP17	0.541871412936505		hsa-miR-155	CD276	-0.599007820610297
				hsa-miR-1281	ARHGAP17	0.548835710641043		hsa-miR-210	CD300A	0.623187840184386
				hsa-miR-146a	ARHGAP17	-0.543574382615185		hsa-miR-132	CD33	-0.589056366962456
				hsa-miR-155	ARHGAP17	-0.689747713031589		hsa-miR-148b	CD33	0.591690707439233
				hsa-miR-940	ARHGAP17	0.580892690534537		hsa-miR-155	CD33	-0.713446752798721
				hsa-miR-1280	ARHGAP18	0.54380582438714		hsa-miR-212	CD33	-0.681319904278398
				hsa-miR-146a	ARHGAP18	-0.543255619829311		hsa-miR-222	CD33	-0.581068279143694
				hsa-miR-155	ARHGAP18	-0.787639971578161		hsa-miR-3663-3p	CD33	0.593696906401624
				hsa-miR-222	ARHGAP18	-0.581524517329835		hsa-miR-155	CD36	-0.620343901120516
				hsa-miR-371-5p	ARHGAP19	-0.557789793628099		hsa-miR-132	CD37	-0.619412714736415
				hsa-miR-155	ARHGAP21	-0.655876616502918		hsa-miR-212	CD37	-0.600037129732713
				hsa-miR-155	ARHGAP23	-0.649002406538302		hsa-miR-155	CD4	-0.59038408764795
				hsa-miR-1238	ARHGAP27	0.552542851514777		hsa-miR-155	CD53	-0.675759692004707
				hsa-miR-155	ARHGAP27	-0.611068142664112		hsa-miR-212	CD53	-0.566061611291979
				hsa-miR-29a	ARHGAP27	-0.582102010229743		hsa-miR-132	CD68	-0.584887312003121
				hsa-miR-940	ARHGAP27	0.555435902528289		hsa-miR-155	CD68	-0.626689080106316
				hsa-miR-1228	ARHGAP9	0.555917098389159		hsa-miR-212	CD68	-0.660677157048787
				hsa-miR-1307	ARHGAP9	-0.558247465893071		hsa-miR-222	CD68	-0.568361467136014
				hsa-miR-155	ARHGAP9	-0.816910848550601		hsa-miR-132	CD80	0.614210432163793
				hsa-miR-186	ARHGAP9	-0.612030301517086		hsa-miR-155	CD80	0.682320826639746
				hsa-miR-222	ARHGAP9	-0.586350513885227		hsa-miR-212	CD80	0.627230865115925
				hsa-miR-505	ARHGAP9	-0.571193872936583		hsa-miR-222	CD80	0.585633784553581
				hsa-miR-132	ARHGDIA	0.628220243114512		hsa-miR-132	CD83	0.668401981521002
				hsa-miR-212	ARHGDIA	0.6210372673333		hsa-miR-155	CD83	0.643543232737764
				hsa-miR-186	ARHGEF11	0.662751828157255		hsa-miR-212	CD83	0.719076487775147
				hsa-miR-222	ARHGEF11	0.548444426971558		hsa-miR-132	CD86	0.607635136708453
				hsa-miR-155	ARHGEF2	0.619955714443523		hsa-miR-155	CD86	0.682702739399808
				hsa-miR-185	ARHGEF2	-0.573501400664931		hsa-miR-212	CD86	0.672945568839534
				hsa-miR-26a	ARHGEF2	0.549812636680787		hsa-miR-222	CD86	0.579969913271971
				hsa-miR-155	ARID5A	0.645265198764564		hsa-miR-132	CD99	-0.610095900654538
				hsa-miR-155	ARL2	-0.617894067642569		hsa-miR-155	CD99	-0.652411348188396
				hsa-miR-93	ARL2	-0.538911021795064		hsa-miR-212	CD99	-0.661163324801436
				hsa-miR-103a	ARL4C	0.549122972173699		hsa-miR-132	CDC42EP2	-0.579705152804927
				hsa-miR-222	ARL4C	-0.545835784824013		hsa-miR-212	CDC42EP2	-0.604779394395889
				hsa-miR-155	ARL5A	-0.573135372265094		hsa-miR-27b	CDR2L	0.612156226921585
				hsa-miR-185	ARL5A	0.54487925676002		hsa-miR-155	CDYL2	0.624157875748942
				hsa-miR-378	ARL5A	0.55900184568555		hsa-miR-222	CDYL2	0.581782235221165
				hsa-miR-155	ARL6IP6	0.620932179293269		hsa-miR-132	CEBPA	-0.590487116203659
				hsa-miR-186	ARL6IP6	0.567786066642388		hsa-miR-155	CEBPA	-0.671387045960888
				hsa-miR-132	ARL8B	0.543361679938988		hsa-miR-212	CEBPA	-0.625993662041698
				hsa-miR-212	ARL8B	0.617691734098977		hsa-miR-3663-3p	CEBPD	0.629470826860054
				hsa-miR-221	ARL8B	-0.559361751995018		hsa-miR-762	CEBPD	0.578240193124582
				hsa-miR-155	ARPC1A	0.568173043861992		hsa-miR-155	CEP120	0.580778507864189
				hsa-miR-1228	ARPC5L	0.558674708050038		hsa-miR-132	CEP135	0.586121165700195
				hsa-miR-1238	ARPC5L	0.552964834459332		hsa-miR-155	CEP135	0.693873337595887
				hsa-miR-155	ARPC5L	-0.728384591445298		hsa-miR-212	CEP135	0.647896650470145
				hsa-miR-1825	ARPC5L	0.548386940326491		hsa-miR-132	CGN	0.61995895484719
				hsa-miR-222	ARPC5L	-0.595034024049198		hsa-miR-155	CGN	0.712644427123549
				hsa-miR-766	ARPC5L	0.560409997783886		hsa-miR-212	CGN	0.680975041336357
				hsa-miR-1228	ARPP19	-0.620126789552704		hsa-miR-155	CHCHD10	-0.63739649951691
				hsa-miR-1234	ARPP19	-0.544267958339353		hsa-miR-212	CHCHD10	-0.569746361729523
				hsa-miR-1238	ARPP19	-0.55268029366672		hsa-miR-222	CHCHD10	-0.576435638127285
				hsa-miR-155	ARPP19	0.661035987868748		hsa-miR-155	CHCHD7	-0.585295331217583
				hsa-miR-212	ARPP19	0.552438381552062		hsa-miR-27b	CHD1L	0.639782087248745
				hsa-miR-26a	ARPP19	0.544126268457371		hsa-miR-212	CHD7	0.566882137236058
				hsa-miR-940	ARPP19	-0.575804956108598		hsa-miR-222	CHMP1A	0.614083203009416
				hsa-miR-371-5p	ARSG	-0.559936942416203		hsa-miR-132	CHST10	0.634236005242574
				hsa-miR-1228	ARV1	0.540508108767172		hsa-miR-212	CHST10	0.641658207338177
				hsa-miR-155	ARV1	-0.699995117048821		hsa-miR-132	CHST13	-0.634113562824085
				hsa-miR-186	ARV1	-0.540700494653654		hsa-miR-155	CHST13	-0.597383242949881
				hsa-miR-378	ARV1	0.573475357913486		hsa-miR-212	CHST13	-0.575089377665667
				hsa-miR-505	ARV1	-0.619316762189725		hsa-miR-132	CHST7	0.69905879999634
				hsa-miR-1228	ASAP1	0.59382539130103		hsa-miR-155	CHST7	0.663292990044589
				hsa-miR-1238	ASAP1	0.563464794845958		hsa-miR-212	CHST7	0.741824040022842
				hsa-miR-155	ASAP1	-0.733828141430811		hsa-miR-222	CHST7	0.576763820004128
				hsa-miR-940	ASAP1	0.567806630764869		hsa-miR-155	CIB1	-0.652171130779239
				hsa-miR-1307	ASB1	-0.550703755644881		hsa-miR-212	CIB1	-0.562998737852288
				hsa-miR-186	ASB1	-0.565633210330501		hsa-miR-155	CISD1	-0.597676279286279
				hsa-miR-155	ASB6	-0.634362053566378		hsa-miR-132	CITED2	-0.618831807402582
				hsa-miR-186	ASB6	-0.538746002878524		hsa-miR-212	CITED2	-0.618780160206373
				hsa-miR-1228	ASCC1	-0.542630482113942		hsa-miR-155	CKB	0.641252625372098
				hsa-miR-1238	ASCC1	-0.543173738676185		hsa-miR-222	CKB	0.587289775154755
				hsa-miR-29a	ASCC1	0.642405943878816		hsa-miR-155	CLEC10A	-0.705028620125229
				hsa-miR-1228	ASCC2	0.547881037658076		hsa-miR-212	CLEC10A	-0.623741984166494
				hsa-miR-1234	ASCC2	0.554580899057945		hsa-miR-132	CLEC4F	0.648088284493154
				hsa-miR-1238	ASCC2	0.548952439862546		hsa-miR-212	CLEC4F	0.594935689533232
				hsa-miR-29a	ASCL2	-0.563323384432819		hsa-miR-212	CLEC4G	-0.594906809719242
				hsa-miR-155	ASGR1	-0.603516256735698		hsa-miR-155	CLEC7A	-0.595894569738564
				hsa-miR-185	ASGR1	0.603061600275263		hsa-miR-155	CLPTM1	0.65215225940631
				hsa-miR-186	ASGR1	-0.695781820531098		hsa-miR-27b	CLTB	0.596354622546038
				hsa-miR-222	ASGR1	-0.559329613930729		hsa-miR-132	CLYBL	-0.621354495311007
				hsa-miR-27a	ASGR1	0.573540247461284		hsa-miR-155	CLYBL	-0.56631686126841
				hsa-miR-361-5p	ASGR1	0.56184311120134		hsa-miR-212	CLYBL	-0.649403517410341
				hsa-miR-7	ASGR1	-0.576398869931932		hsa-miR-27b	CMTM7	0.585129471433551
				hsa-miR-186	ASGR2	-0.616349982261909		hsa-miR-155	CMTM8	-0.562826901584587
				hsa-miR-212	ASGR2	-0.618940555259204		hsa-miR-132	CNN3	0.56661288322282
				hsa-miR-221	ASGR2	0.596213719153105		hsa-miR-212	CNN3	0.57343453842464
				hsa-miR-26a	ASGR2	-0.542525322942351		hsa-miR-132	CNOT10	0.628967729381864
				hsa-miR-27a	ASGR2	0.593305292502438		hsa-miR-212	CNOT10	0.690156369932707
				hsa-miR-378	ASGR2	0.597456938557559		hsa-miR-186	CNOT3	-0.5634141697702
				hsa-miR-421	ASGR2	0.545954855518013		hsa-miR-421	CNOT7	0.582936287012305
				hsa-miR-29b	ASH2L	0.619099851887609		hsa-miR-155	CNPY2	-0.585478780115126
				hsa-miR-1228	ASMTL	-0.560807129189974		hsa-miR-132	CNTNAP1	0.610209730961459
				hsa-miR-155	ASMTL	0.618551331656366		hsa-miR-212	CNTNAP1	0.661290303429571
				hsa-miR-29a	ASMTL	0.560546974596381		hsa-miR-155	COBLL1	0.581710666880018
				hsa-miR-93	ASMTL	0.548174892442464		hsa-miR-212	COBLL1	0.566273442453403
				hsa-miR-940	ASMTL	-0.564075779396173		hsa-miR-3663-3p	COBLL1	-0.608063328658457
				hsa-miR-146a	ASPHD2	-0.577298037904208		hsa-miR-212	COL18A1	-0.579668248351052
				hsa-miR-155	ASPHD2	-0.692976421486393		hsa-miR-222	COMMD1	0.5708546796554
				hsa-miR-222	ASPHD2	-0.586178582089485		hsa-miR-132	COMMD2	0.595637985689006
				hsa-miR-330-3p	ASS1	0.547607905410785		hsa-miR-155	COMMD2	0.594464772257418
				hsa-miR-155	ASXL1	0.658845799501895		hsa-miR-212	COMMD2	0.657013314793409
				hsa-miR-29a	ATF1	-0.541842692591449		hsa-miR-132	COX5B	-0.638520977664111
				hsa-miR-212	ATF4	0.620476686736976		hsa-miR-212	COX5B	-0.698347565041228
				hsa-miR-221	ATF4	-0.542444828476288		hsa-miR-132	CP110	-0.664930810460408
				hsa-miR-378	ATF4	-0.645574579929847		hsa-miR-212	CP110	-0.70733951488965
				hsa-miR-146a	ATF5	-0.575891359095748		hsa-miR-3663-3p	CP110	0.574023600776891
				hsa-miR-155	ATF6	0.607261232834438		hsa-miR-155	CPNE3	-0.679811110452629
				hsa-miR-155	ATG9A	-0.566901273314577		hsa-miR-222	CPNE3	-0.616225808994552
				hsa-miR-378	ATL3	-0.56610890992405		hsa-miR-132	CPVL	-0.57017806728414
				hsa-miR-1307	ATM	-0.547904169445645		hsa-miR-155	CPVL	-0.784499472318668
				hsa-miR-155	ATM	-0.67022866922079		hsa-miR-212	CPVL	-0.601484589936847
				hsa-miR-186	ATM	-0.588412138375676		hsa-miR-222	CPVL	-0.604688028254326
				hsa-miR-27a	ATM	0.572699258903458		hsa-miR-155	CRLF2	0.688391846208356
				hsa-miR-378	ATM	0.611014357420302		hsa-miR-212	CRLF2	0.586362325969388
				hsa-miR-505	ATM	-0.575864229306269		hsa-miR-155	CRLS1	-0.614837603425018
				hsa-miR-155	ATP10A	0.545328309193653		hsa-miR-132	CSE1L	0.579950899051225
				hsa-miR-222	ATP10A	0.564749523503335		hsa-miR-212	CSE1L	0.629492843941684
				hsa-miR-155	ATP11B	-0.553385719589529		hsa-miR-155	CSF1	-0.568862728124848
				hsa-miR-505	ATP11C	0.633044940280216		hsa-miR-155	CSF1R	-0.586452378591123
				hsa-miR-1307	ATP1A1	-0.553408489910653		hsa-miR-212	CSTA	0.624249674197188
				hsa-miR-155	ATP1B2	-0.696175121961516		hsa-miR-155	CTNNA1	0.566849712487912
				hsa-miR-132	ATP1B3	0.606386970181154		hsa-miR-155	CTNNAL1	-0.647222483615217
				hsa-miR-212	ATP1B3	0.669871921578176		hsa-miR-155	CTNNBIP1	-0.595813933527205
				hsa-miR-371-5p	ATP1B3	0.539548365919908		hsa-miR-155	CTSB	-0.636588670105507
				hsa-miR-378	ATP1B3	-0.641807186473764		hsa-miR-155	CTTNBP2	-0.598483844236946
				hsa-miR-505	ATP1B3	0.621614374622489		hsa-miR-212	CTTNBP2	-0.625344097389799
				hsa-miR-155	ATP2A3	-0.637474700040982		hsa-miR-155	CUGBP2	0.732337614189095
				hsa-miR-186	ATP2A3	-0.576830244889714		hsa-miR-1915	CUL4A	-0.605692178004194
				hsa-miR-1228	ATP5F1	0.572257859224401		hsa-miR-3663-3p	CUL4A	-0.633656426336242
				hsa-miR-155	ATP5F1	-0.732562338411446		hsa-miR-762	CUL4A	-0.597526421338149
				hsa-miR-186	ATP5F1	-0.575174952980015		hsa-miR-155	CUTA	-0.62456513476759
				hsa-miR-940	ATP5F1	0.550089982837299		hsa-miR-3663-3p	CXCL13	0.585076487368795
				hsa-miR-1280	ATP5G3	0.542517280046081		hsa-miR-362-5p	CXCR3	-0.566421540908563
				hsa-miR-155	ATP5G3	-0.593906203205398		hsa-miR-155	CXCR7	0.615682915032643
				hsa-miR-186	ATP5H	-0.568237390999468		hsa-miR-222	CXCR7	0.604186711883759
				hsa-miR-132	ATP5J	-0.577700704013157		hsa-miR-132	CXorf21	-0.572486097450864
				hsa-miR-155	ATP5J	-0.562719811600281		hsa-miR-132	CXorf40B	0.634168589021531
				hsa-miR-186	ATP5J	-0.577024322649145		hsa-miR-155	CXorf40B	0.670112321257177
				hsa-miR-212	ATP5J	-0.658145575607226		hsa-miR-212	CXorf40B	0.681606371690831
				hsa-miR-505	ATP5J	-0.565292930003538		hsa-miR-155	CYB5A	0.59410501909111
				hsa-miR-155	ATP5S	0.632035875994896		hsa-miR-34a	CYP2R1	-0.576594333464307
				hsa-miR-7	ATP5S	0.548618931345174		hsa-miR-3663-3p	CYP51A1	-0.599179538533228
				hsa-miR-155	ATP6AP1	-0.623579186253793		hsa-miR-155	CYTH1	0.674332816268343
				hsa-miR-505	ATP6AP1	-0.543201544219234		hsa-miR-155	CYTIP	0.650563983629514
				hsa-miR-155	ATP6AP2	-0.733627431474313		hsa-miR-222	CYTIP	0.567121597737791
				hsa-miR-378	ATP6AP2	0.586916288840201		hsa-miR-132	CYYR1	0.597179213149721
				hsa-miR-505	ATP6AP2	-0.649002278171618		hsa-miR-212	CYYR1	0.641483177115283
				hsa-miR-197	ATP6V0A1	0.60000387017084		hsa-miR-155	DAGLA	-0.575326966278851
				hsa-miR-331-3p	ATP6V0A1	0.539046203293003		hsa-miR-155	DAPP1	0.587379341663038
				hsa-miR-155	ATP6V0B	-0.542666524454445		hsa-miR-155	DBNL	0.702816016957748
				hsa-miR-222	ATP6V0C	-0.539160279585674		hsa-miR-1915	DBNL	-0.584301857610522
				hsa-miR-155	ATP6V0E1	-0.637316391424238		hsa-miR-222	DBNL	0.626803817182292
				hsa-miR-17	ATP6V0E1	-0.552293464959213		hsa-miR-3663-3p	DBNL	-0.657920816206299
				hsa-miR-26a	ATP6V0E1	-0.573529547370146		hsa-miR-3665	DBNL	-0.603613088463367
				hsa-miR-193b	ATP6V0E2	-0.539485788923818		hsa-miR-132	DCAF6	0.576571707305682
				hsa-miR-212	ATP6V0E2	-0.546658399228894		hsa-miR-155	DCAF6	0.650285475885811
				hsa-miR-1228	ATP6V1A	0.544307791325187		hsa-miR-212	DCAF6	0.671712592126142
				hsa-miR-155	ATP6V1A	-0.676392211070256		hsa-miR-1915	DCTN3	0.579675161542911
				hsa-miR-212	ATP6V1E1	0.575478928968154		hsa-miR-3663-3p	DCTN3	0.648219537361557
				hsa-miR-132	ATP6V1G1	0.563358819475077		hsa-miR-4271	DCTN3	0.607985048150304
				hsa-miR-212	ATP6V1G1	0.573338209324397		hsa-miR-212	DCUN1D4	-0.582320759325969
				hsa-miR-371-5p	ATP6V1G1	0.607759195794591		hsa-miR-132	DDA1	0.577310416598768
				hsa-miR-155	ATP7A	-0.561263675392694		hsa-miR-155	DDA1	0.564668563440622
				hsa-miR-155	ATP7B	-0.69712231729256		hsa-miR-212	DDA1	0.593979393509748
				hsa-miR-222	ATP7B	-0.581832434225856		hsa-miR-132	DDX58	-0.603249863140797
				hsa-miR-1280	ATPAF2	0.541958931089861		hsa-miR-212	DDX58	-0.618306988902364
				hsa-miR-155	ATPAF2	-0.540937866017867		hsa-miR-155	DECR1	-0.602332650510044
				hsa-miR-186	ATPAF2	-0.550266086684887		hsa-miR-212	DECR1	-0.603959728149663
				hsa-miR-193b	ATPIF1	-0.570121010364649		hsa-miR-3663-3p	DENND1A	-0.573190308822298
				hsa-miR-93	ATPIF1	-0.550058316193627		hsa-miR-132	DENND4C	-0.563665097242455
				hsa-miR-101	ATXN1	-0.625220237570656		hsa-miR-212	DENND4C	-0.6271295876397
				hsa-miR-155	ATXN1	-0.574972713060087		hsa-miR-155	DENND5A	0.644557836186677
				hsa-miR-222	ATXN1	-0.689263366821714		hsa-miR-222	DENND5A	0.618474410128579
				hsa-miR-7	ATXN1	-0.584000199576721		hsa-miR-155	DEXI	0.566686649226487
				hsa-miR-34a	AURKA	0.553655107248219		hsa-miR-132	DFNA5	0.591567348863183
				hsa-miR-1228	AVEN	-0.561334950809455		hsa-miR-212	DFNA5	0.691973738188965
				hsa-miR-155	AVEN	0.654505065545699		hsa-miR-132	DHCR7	0.596032538798491
				hsa-miR-378	AVEN	-0.571637926908943		hsa-miR-212	DHCR7	0.62213245210794
				hsa-miR-505	AVEN	0.595605764364979		hsa-miR-132	DHDDS	0.657473262335211
				hsa-miR-1228	AXL	0.56393260824216		hsa-miR-155	DHDDS	0.563811530122352
				hsa-miR-1281	AXL	0.554585228730917		hsa-miR-212	DHDDS	0.697697322695111
				hsa-miR-155	AXL	-0.551520440667846		hsa-miR-155	DHPS	0.581198860284009
				hsa-miR-186	AZI1	-0.544041991752483		hsa-miR-212	DHRS2	-0.578856432232534
				hsa-miR-155	AZI2	0.57131848105977		hsa-miR-132	DHTKD1	-0.598655228631341
				hsa-miR-186	AZI2	0.56949423699149		hsa-miR-212	DHTKD1	-0.577620891895893
				hsa-miR-222	AZI2	0.578380728055907		hsa-miR-155	DIXDC1	0.579378953486622
				hsa-miR-155	B3GNT5	-0.551257787837023		hsa-miR-222	DIXDC1	0.643105815833042
				hsa-miR-155	B4GALT5	0.617848670008168		hsa-miR-132	DLAT	0.567807165435644
				hsa-miR-155	B4GALT7	0.547705208828102		hsa-miR-212	DLAT	0.623923154837687
				hsa-miR-155	BAALC	0.65036000752912		hsa-miR-132	DLGAP4	0.603205876826502
				hsa-miR-155	BAIAP2	-0.575217203515407		hsa-miR-212	DLGAP4	0.626230325192754
				hsa-miR-1228	BANF1	0.588055331052369		hsa-miR-629	DMD	0.602205358017079
				hsa-miR-1234	BANF1	0.55739574037668		hsa-miR-132	DNAH3	0.563189604919874
				hsa-miR-1238	BANF1	0.56963361170427		hsa-miR-146a	DNAJB11	-0.566079741829093
				hsa-miR-940	BANF1	0.581029649225879		hsa-miR-155	DNAJC18	0.617967649696423
				hsa-miR-29a	BANP	0.605955848373946		hsa-miR-93	DNM1L	-0.565986940114337
				hsa-miR-155	BAP1	-0.691479047050459		hsa-miR-155	DOCK2	-0.675969348465292
				hsa-miR-155	BATF	0.620862080002261		hsa-miR-132	DPEP2	-0.56502809325084
				hsa-miR-1275	BATF3	0.539016678386534		hsa-miR-132	DPP9	0.57284563507414
				hsa-miR-155	BATF3	0.666719039212344		hsa-miR-212	DPP9	0.56787928887517
				hsa-miR-940	BATF3	-0.550726783126639		hsa-miR-155	DPY19L1	-0.600465957754544
				hsa-miR-155	BCAR3	-0.647720792504741		hsa-miR-222	DPY19L1	-0.58124407475171
				hsa-miR-212	BCDIN3D	-0.544815381871036		hsa-miR-132	DPY19L4	-0.593816552977042
				hsa-miR-155	BCKDK	-0.538812072664735		hsa-miR-212	DPY19L4	-0.612081624026316
				hsa-miR-155	BCL11A	0.612965268639177		hsa-miR-132	DPYD	-0.639971616351389
				hsa-miR-155	BCL2L1	0.658023988578784		hsa-miR-155	DPYD	-0.59383087779499
				hsa-miR-505	BCL2L1	0.5651264963689		hsa-miR-212	DPYD	-0.718409123699161
				hsa-miR-1228	BCL2L11	-0.595239839743866		hsa-miR-212	DSC2	0.56663293594053
				hsa-miR-1238	BCL2L11	-0.567513485812558		hsa-miR-155	DSG2	0.609798594908117
				hsa-miR-155	BCL2L11	0.542473472680255		hsa-miR-212	DSG2	0.610038933657744
				hsa-miR-155	BCL2L2	0.598517608040893		hsa-miR-155	DUOX1	-0.616410276543496
				hsa-miR-155	BCL3	0.566492534185645		hsa-miR-132	DUOXA1	-0.568152763508124
				hsa-miR-155	BCL6	-0.680398288009297		hsa-miR-155	DUOXA1	-0.669040605467976
				hsa-miR-155	BCL7B	0.621076681862236		hsa-miR-212	DUOXA1	-0.612905407734922
				hsa-miR-186	BCL7B	0.542471416094198		hsa-miR-362-5p	DUSP14	-0.570841315023433
				hsa-miR-146a	BCL7C	0.580860031121941		hsa-miR-155	DUSP23	-0.67933335405115
				hsa-miR-155	BCL7C	0.582205770610625		hsa-miR-155	DUT	-0.692617078834931
				hsa-miR-212	BCL9	-0.539987554144082		hsa-miR-155	DYM	-0.606900285199675
				hsa-miR-93	BCL9	-0.550671074572158		hsa-miR-193b	EAF1	0.572202988935934
				hsa-miR-155	BCL9L	0.566520196261505		hsa-miR-155	EBI3	0.666045845904924
				hsa-miR-505	BCL9L	0.540023478728294		hsa-miR-212	EBI3	0.63652937975926
				hsa-miR-1275	BHLHE22	0.539228371837152		hsa-miR-551b	EBPL	-0.566934894345039
				hsa-miR-155	BHLHE22	0.661901322383472		hsa-miR-132	ECE1	0.668022095830501
				hsa-miR-186	BHLHE22	0.564238290982233		hsa-miR-155	ECE1	0.638072559434293
				hsa-miR-361-5p	BHLHE22	-0.55364876420263		hsa-miR-212	ECE1	0.701530182523887
				hsa-miR-7	BHLHE22	0.548283925448907		hsa-miR-132	EDEM2	-0.568524377801471
				hsa-miR-155	BIN1	-0.691229742435946		hsa-miR-212	EDEM2	-0.584096603837971
				hsa-miR-155	BIRC2	0.55528585865113		hsa-miR-155	EEF1E1	-0.590380538926872
				hsa-miR-186	BIRC3	0.539674961329253		hsa-miR-574-5p	EFHA1	0.580772302005545
				hsa-miR-212	BIRC3	0.598858068688617		hsa-miR-3663-3p	EFNA1	0.572429620519803
				hsa-miR-371-5p	BIRC3	0.555300474798936		hsa-miR-132	EHBP1	-0.62695956029328
				hsa-miR-378	BIVM	0.56369687868695		hsa-miR-155	EHBP1	-0.572828685473933
				hsa-miR-1275	BLCAP	-0.555661588206876		hsa-miR-212	EHBP1	-0.61923175355619
				hsa-miR-155	BLCAP	-0.771809620832663		hsa-miR-155	EIF3L	-0.647602946361401
				hsa-miR-185	BLCAP	0.56491924751209		hsa-miR-222	EIF3L	-0.600494164582648
				hsa-miR-505	BLCAP	-0.543163304586517		hsa-miR-155	ELL2	0.593853014611812
				hsa-miR-7	BLVRA	0.676985798138289		hsa-miR-129-3p	ELMO2	0.564154015152432
				hsa-miR-1280	BMP6	-0.588496614972721		hsa-miR-132	ELOVL1	0.577127283343213
				hsa-miR-155	BMP6	0.600295740696676		hsa-miR-212	ELOVL1	0.564986732567583
				hsa-miR-29a	BMP6	0.614530706212197		hsa-miR-155	EML4	-0.583912780831127
				hsa-miR-210	BNIP3	0.661236008110131		hsa-miR-132	ENPP4	0.628308406150425
				hsa-miR-210	BNIP3L	0.739940516680787		hsa-miR-212	ENPP4	0.71201335369703
				hsa-miR-186	BOLA3	-0.543632311238202		hsa-miR-155	ENTHD1	0.657829980551795
				hsa-miR-212	BRF2	0.548585502945397		hsa-miR-3663-3p	ENTHD1	-0.569683085674115
				hsa-miR-17	BRI3	-0.579287523865763		hsa-miR-193b	ENTPD1	-0.629928780303668
				hsa-miR-155	BRMS1L	0.567537027820477		hsa-miR-155	EPAS1	-0.676260261687085
				hsa-miR-449a	BRP44	0.546326904027324		hsa-miR-222	EPAS1	-0.595054884405277
				hsa-miR-155	BRPF1	-0.540571789593803		hsa-miR-155	EPCAM	-0.57537664271027
				hsa-miR-197	BRPF1	0.566205852362525		hsa-miR-155	EPDR1	0.687782433719487
				hsa-miR-1275	BRPF3	0.541818392773451		hsa-miR-222	EPDR1	0.581706209440145
				hsa-miR-155	BRPF3	0.607851114163828		hsa-miR-132	ERAL1	0.599741337428405
				hsa-miR-186	BRPF3	0.633512113354033		hsa-miR-155	ERAL1	0.649164743732944
				hsa-miR-155	BTBD10	-0.578413811534553		hsa-miR-212	ERAL1	0.645848457974896
				hsa-miR-1228	BTBD12	0.569404834411075		hsa-miR-132	ERGIC3	-0.676969913553623
				hsa-miR-1238	BTBD12	0.564784754057064		hsa-miR-155	ERGIC3	-0.623526531078498
				hsa-miR-1280	BTBD12	0.540413521105609		hsa-miR-212	ERGIC3	-0.712338404249241
				hsa-miR-155	BTBD12	-0.743498849196647		hsa-miR-132	ESAM	-0.622912530200392
				hsa-miR-155	BTF3L4	-0.688127470286216		hsa-miR-212	ESAM	-0.604629529196365
				hsa-miR-132	BTG1	0.552771758830904		hsa-miR-27b	ESYT1	0.56359200529296
				hsa-miR-212	BTG1	0.662505036356112		hsa-miR-155	ETFB	-0.606722331462585
				hsa-miR-221	BTG1	-0.539749498489759		hsa-miR-3663-3p	ETFB	0.61831343132692
				hsa-miR-27a	BTG1	-0.573782021547238		hsa-miR-129-3p	ETNK1	0.569285284455957
				hsa-miR-378	BTG1	-0.555675343347919		hsa-miR-193b	ETV5	-0.595939900695183
				hsa-miR-155	BTG3	0.628725988467059		hsa-miR-155	EVI2B	-0.583813284705875
				hsa-miR-186	BTG3	0.552039647483338		hsa-miR-155	EVL	-0.719093483720604
				hsa-miR-1280	BTK	0.548863837461443		hsa-miR-212	EVL	-0.60280118514946
				hsa-miR-155	BTK	-0.57512164129376		hsa-miR-222	EVL	-0.668397048873435
				hsa-miR-193b	BTK	-0.554049906820431		hsa-miR-421	EVL	0.570078469822837
				hsa-miR-29a	BTK	-0.572874509819801		hsa-miR-222	EXOSC10	0.625679372118199
				hsa-miR-940	BTK	0.544308552407956		hsa-miR-222	FABP4	-0.579621713292814
				hsa-miR-222	BTN3A3	0.626122268932007		hsa-miR-15b	FADS2	-0.576680896355122
				hsa-miR-155	BUD13	0.590410905624392		hsa-miR-132	FAM107B	0.571326055152064
				hsa-miR-449a	BYSL	-0.621149209824186		hsa-miR-212	FAM107B	0.632440345137595
				hsa-miR-155	BZW1	0.583133305614375		hsa-miR-132	FAM108C1	0.713518685098803
				hsa-miR-7	BZW1	0.541910209288167		hsa-miR-212	FAM108C1	0.733213857189273
				hsa-miR-132	C10orf105	-0.554047919474684		hsa-miR-132	FAM111A	-0.604985821347189
				hsa-miR-186	C10orf105	-0.539268721270249		hsa-miR-212	FAM111A	-0.649418816599146
				hsa-miR-212	C10orf105	-0.662180869363467		hsa-miR-4271	FAM111A	0.573890249027027
				hsa-miR-221	C10orf105	0.681193456662967		hsa-miR-1915	FAM113A	0.563258495313713
				hsa-miR-26a	C10orf105	-0.570902851204119		hsa-miR-4271	FAM113A	0.605648025706784
				hsa-miR-378	C10orf105	0.694965559301085		hsa-miR-34a	FAM129B	-0.585208522316113
				hsa-miR-93	C10orf105	-0.599890730905769		hsa-miR-155	FAM131C	0.600671991341825
				hsa-miR-27a	C10orf11	0.647483416903428		hsa-miR-222	FAM131C	0.572271264772487
				hsa-miR-378	C10orf128	0.570213001780469		hsa-miR-193b	FAM135B	-0.598048196129165
				hsa-miR-103a	C10orf57	-0.544789642563897		hsa-miR-132	FAM13A	0.563718650105583
				hsa-miR-146a	C10orf57	0.549137597361239		hsa-miR-212	FAM13A	0.622655534936109
				hsa-miR-155	C10orf6	-0.591155321287616		hsa-miR-132	FAM18A	0.582313229580344
				hsa-miR-29a	C10orf6	-0.565252438226866		hsa-miR-212	FAM18A	0.678847850336197
				hsa-miR-155	C11orf17	0.5562080540494		hsa-miR-132	FAM190B	0.621526887483783
				hsa-miR-155	C11orf21	-0.72524614264216		hsa-miR-212	FAM190B	0.599762521823962
				hsa-miR-26a	C11orf21	-0.540427648792912		hsa-miR-155	FAM53A	-0.617949069543264
				hsa-miR-29a	C11orf21	-0.549882517845324		hsa-miR-132	FAM57A	0.590258462747485
				hsa-miR-146a	C11orf24	-0.594913468477691		hsa-miR-212	FAM57A	0.585505553811126
				hsa-miR-155	C12orf26	0.539168107628608		hsa-miR-132	FAM60A	0.631918344017757
				hsa-miR-221	C12orf41	-0.559589862048738		hsa-miR-155	FAM60A	0.67034225550564
				hsa-miR-129-3p	C12orf44	0.555653705492069		hsa-miR-212	FAM60A	0.668009632835849
				hsa-miR-155	C12orf45	-0.58114164927858		hsa-miR-212	FAM69A	0.661543142267535
				hsa-miR-222	C12orf45	-0.62347647686727		hsa-miR-132	FASN	0.666578315838318
				hsa-miR-503	C12orf45	0.544970079238061		hsa-miR-212	FASN	0.693906186863063
				hsa-miR-1228	C12orf5	0.541345450126328		hsa-miR-3663-3p	FASN	-0.578484266437771
				hsa-miR-155	C12orf5	-0.640099768847872		hsa-miR-4271	FASN	-0.565923601206048
				hsa-miR-222	C12orf76	0.550056906184176		hsa-miR-155	FBP1	-0.592248601103802
				hsa-miR-155	C13orf16	-0.560810896886691		hsa-miR-222	FBP1	-0.577488427599677
				hsa-miR-146a	C13orf18	-0.611321039997267		hsa-miR-132	FCGRT	-0.638071658832908
				hsa-miR-155	C13orf18	-0.696483800685687		hsa-miR-155	FCGRT	-0.713859179286737
				hsa-miR-222	C13orf18	-0.642236488786583		hsa-miR-212	FCGRT	-0.660404447256189
				hsa-miR-1228	C13orf27	-0.541710776256744		hsa-miR-222	FCGRT	-0.5745855036537
				hsa-miR-3663-3p	C14orf109	0.541880969533425		hsa-miR-132	FDFT1	0.598245092795181
				hsa-miR-449a	C14orf135	0.54105404917359		hsa-miR-212	FDFT1	0.60940768947988
				hsa-miR-1275	C14orf147	-0.572696941181732		hsa-miR-132	FERMT2	0.591320395004089
				hsa-miR-155	C14orf147	-0.661550501996693		hsa-miR-155	FERMT2	0.633138458422223
				hsa-miR-93	C14orf93	-0.580432955433651		hsa-miR-212	FERMT2	0.655463796119384
				hsa-miR-449a	C15orf17	0.626157587301853		hsa-miR-3663-3p	FERMT2	-0.612526166827889
				hsa-miR-212	C15orf39	0.552210464484394		hsa-miR-155	FES	-0.60013266248841
				hsa-miR-1228	C15orf48	-0.595433482352859		hsa-miR-155	FGD5	-0.598456693756466
				hsa-miR-1234	C15orf48	-0.563642501474486		hsa-miR-155	FGL2	-0.68409171706534
				hsa-miR-1238	C15orf48	-0.566787894950424		hsa-miR-222	FGL2	-0.582319777730173
				hsa-miR-155	C15orf48	0.707002280866696		hsa-miR-3663-3p	FIGLA	-0.606913774814089
				hsa-miR-200c	C15orf48	-0.540013509193971		hsa-miR-155	FKRP	0.570690139544584
				hsa-miR-26a	C15orf48	0.542507036606698		hsa-miR-222	FKRP	0.56845483982784
				hsa-miR-29a	C15orf48	0.555892180431377		hsa-miR-132	FLJ10324	-0.588417107111941
				hsa-miR-940	C15orf48	-0.590126389001784		hsa-miR-155	FLJ22662	-0.569325082657356
				hsa-miR-1307	C16orf53	-0.600919082704121		hsa-miR-155	FLT3	0.568539132556328
				hsa-miR-155	C16orf53	-0.594489787558424		hsa-miR-212	FLT3	0.611981995867948
				hsa-miR-186	C16orf53	-0.581738242900778		hsa-miR-148b	FLVCR2	0.610376986642988
				hsa-miR-222	C16orf53	-0.587640068688301		hsa-miR-362-5p	FLVCR2	0.590993461584212
				hsa-miR-1238	C16orf57	0.541284737419927		hsa-miR-155	FNDC3B	0.71274290297913
				hsa-miR-1307	C16orf58	-0.55885348104205		hsa-miR-212	FNDC3B	0.612743933941583
				hsa-miR-155	C16orf61	-0.64644690259649		hsa-miR-222	FNDC3B	0.57225428549367
				hsa-miR-503	C16orf68	0.582891291221352		hsa-miR-3663-3p	FNDC3B	-0.594883861116075
				hsa-miR-1228	C16orf7	0.603945955994752		hsa-miR-155	FOXP1	0.588822684172961
				hsa-miR-1238	C16orf7	0.572061878790901		hsa-miR-155	FOXQ1	-0.696595870559683
				hsa-miR-155	C16orf7	-0.776439862183529		hsa-miR-155	FPR3	-0.609295817864824
				hsa-miR-186	C16orf7	-0.557131006864108		hsa-miR-212	FPR3	-0.622003867860146
				hsa-miR-505	C16orf7	-0.575711257335707		hsa-miR-155	FSTL1	0.607128324674092
				hsa-miR-940	C16orf7	0.55115020357342		hsa-miR-155	FTH1	0.650760429725001
				hsa-miR-103a	C16orf75	-0.595703537445967		hsa-miR-212	FTH1	0.593454290296461
				hsa-miR-132	C16orf75	-0.545802361832939		hsa-miR-155	FUCA1	-0.675557985233551
				hsa-miR-212	C16orf75	-0.538867861373673		hsa-miR-222	FUCA1	-0.639170482551018
				hsa-miR-92a	C16orf75	-0.587762245388356		hsa-miR-132	FXR2	0.59763336424077
				hsa-miR-93	C16orf75	-0.588787542229176		hsa-miR-212	FXR2	0.607404005579678
				hsa-miR-155	C16orf79	-0.66328606042216		hsa-miR-155	FXYD5	-0.611633589140496
				hsa-miR-185	C16orf79	0.551075276638032		hsa-miR-212	FXYD5	-0.563142854318618
				hsa-miR-186	C16orf79	-0.605814919859316		hsa-miR-155	FZD3	-0.654225548045726
				hsa-miR-222	C16orf79	-0.595869755172764		hsa-miR-212	FZD3	-0.622959152514227
				hsa-miR-7	C16orf79	-0.56580085204498		hsa-miR-3663-3p	G0S2	0.567604303580635
				hsa-miR-155	C16orf91	-0.568632462628257		hsa-miR-132	GABPB1	0.659489049748691
				hsa-let-7b	C17orf100	-0.541888923542176		hsa-miR-155	GABPB1	0.659090652710071
				hsa-miR-193a-3p	C17orf100	0.54893441250202		hsa-miR-212	GABPB1	0.65331757999541
				hsa-miR-1275	C17orf106	0.545657221212808		hsa-miR-3663-3p	GABPB1	-0.564971184349639
				hsa-miR-155	C17orf48	0.619662268278091		hsa-miR-4271	GABPB1	-0.566720024898242
				hsa-miR-222	C17orf48	0.545500151916395		hsa-miR-155	GADD45A	0.677655813292313
				hsa-miR-1228	C17orf58	-0.562386250803608		hsa-miR-132	GALNT12	-0.612322782917272
				hsa-miR-1234	C17orf58	-0.571814578874968		hsa-miR-212	GALNT12	-0.609087383694302
				hsa-miR-1238	C17orf58	-0.574586702462889		hsa-miR-3663-3p	GALNT12	0.580174594126584
				hsa-miR-155	C17orf58	0.657071310410953		hsa-miR-4271	GALNT12	0.592961885247689
				hsa-miR-200c	C17orf58	-0.549682402630249		hsa-miR-1915	GBE1	-0.563752665915218
				hsa-miR-29a	C17orf58	0.58795288451216		hsa-miR-155	GCET2	0.606434397069404
				hsa-miR-940	C17orf58	-0.569289684040117		hsa-miR-132	GCNT1	-0.633350173524
				hsa-miR-186	C17orf67	0.575398599381745		hsa-miR-212	GCNT1	-0.648361937467152
				hsa-miR-551b	C17orf70	-0.578575711564379		hsa-miR-132	GCNT2	0.623826081629772
				hsa-miR-330-3p	C17orf87	-0.543055348380683		hsa-miR-212	GCNT2	0.667472155605883
				hsa-miR-1228	C18orf55	0.573112865781456		hsa-miR-155	GEMIN8	0.580157319091364
				hsa-miR-1234	C18orf55	0.545593558965672		hsa-miR-421	GEMIN8	-0.600788066059205
				hsa-miR-1238	C18orf55	0.559927792553135		hsa-miR-155	GFOD1	-0.647987538616091
				hsa-miR-1280	C18orf55	0.559191583884355		hsa-miR-132	GFPT1	0.590136952839396
				hsa-miR-155	C18orf55	-0.611389179708577		hsa-miR-132	GFRA2	-0.625326445725279
				hsa-miR-940	C18orf55	0.576125528862448		hsa-miR-212	GFRA2	-0.600478863879125
				hsa-miR-155	C19orf2	-0.602725038928363		hsa-miR-155	GGH	0.605701981615909
				hsa-miR-200c	C19orf2	0.567697844837259		hsa-miR-212	GGT5	-0.572608800891396
				hsa-miR-181c	C19orf38	0.579959508841807		hsa-miR-132	GJB2	0.606337380115707
				hsa-miR-155	C19orf50	0.592302251919709		hsa-miR-212	GJB2	0.612121476415278
				hsa-miR-505	C19orf50	0.599612223932064		hsa-miR-155	GLT25D1	-0.670216563756754
				hsa-miR-1228	C19orf60	0.564291152296166		hsa-miR-222	GLT25D1	-0.614387714993146
				hsa-miR-1234	C19orf60	0.565706295595167		hsa-miR-221	GLTP	0.585727180749624
				hsa-miR-1280	C19orf60	0.542541204408569		hsa-miR-181b	GMFB	-0.564503739387761
				hsa-miR-155	C19orf60	-0.641323439644368		hsa-miR-132	GOLGA7	-0.567691255953679
				hsa-miR-940	C19orf60	0.556053614987081		hsa-miR-155	GOLGA7	-0.571322122033783
				hsa-miR-186	C19orf66	0.626402763023959		hsa-miR-212	GOLGA7	-0.601229151727755
				hsa-miR-155	C1orf106	-0.736787280744585		hsa-miR-132	GPAM	-0.592744235156919
				hsa-miR-222	C1orf106	-0.553228002096842		hsa-miR-155	GPAM	-0.578161071919436
				hsa-miR-155	C1orf109	-0.568018590939204		hsa-miR-212	GPAM	-0.632129638373763
				hsa-miR-1275	C1orf115	-0.641459808393262		hsa-miR-762	GPC4	0.567742687758337
				hsa-miR-155	C1orf115	-0.704066331537671		hsa-miR-155	GPD1L	-0.682019717809817
				hsa-miR-185	C1orf115	0.57866422614349		hsa-miR-222	GPD1L	-0.572924768326853
				hsa-miR-186	C1orf115	-0.616685341272339		hsa-miR-155	GPR109A	-0.612707219635555
				hsa-miR-361-5p	C1orf115	0.598321432771841		hsa-miR-132	GPR109B	-0.572095548075111
				hsa-miR-505	C1orf115	-0.542078183721476		hsa-miR-155	GPR109B	-0.650071153406143
				hsa-miR-7	C1orf115	-0.632291915967864		hsa-miR-212	GPR109B	-0.619414090412656
				hsa-miR-155	C1orf122	0.620127123316216		hsa-miR-222	GPR109B	-0.60352143424895
				hsa-miR-155	C1orf144	0.636643263134489		hsa-miR-212	GPR114	0.570078024513181
				hsa-miR-186	C1orf144	0.611111842058535		hsa-miR-132	GPR137B	0.577671671573247
				hsa-miR-378	C1orf144	-0.55341113212061		hsa-miR-212	GPR157	0.58269149424926
				hsa-miR-1228	C1orf162	0.553433074957781		hsa-miR-155	GPR171	0.613811481116409
				hsa-miR-155	C1orf162	-0.693267603492113		hsa-miR-155	GPT	-0.603010927707611
				hsa-miR-25	C1orf162	-0.587375190394353		hsa-miR-222	GPT	-0.568245474933385
				hsa-miR-26a	C1orf162	-0.561825028394037		hsa-miR-155	GPX3	-0.647593392689087
				hsa-miR-505	C1orf162	-0.554547094585849		hsa-miR-222	GPX3	-0.663096225173848
				hsa-miR-940	C1orf162	0.549048710432975		hsa-miR-155	GRAMD4	-0.587067962602254
				hsa-miR-1228	C1orf53	-0.542711800409554		hsa-miR-155	GRINA	0.597672682867743
				hsa-miR-1234	C1orf53	-0.552272299161658		hsa-miR-155	GRSF1	0.59033116277357
				hsa-miR-155	C1orf53	0.673337441673735		hsa-miR-181b	GSN	-0.589386352533604
				hsa-miR-940	C1orf53	-0.56470121711178		hsa-miR-212	GSTK1	-0.569249477103338
				hsa-miR-1228	C1orf54	0.552232988506732		hsa-miR-155	GTF2E2	0.635908428314456
				hsa-miR-155	C1orf54	-0.725855009278589		hsa-miR-362-5p	GYS1	-0.650550464727121
				hsa-miR-505	C1orf54	-0.54117897691411		hsa-miR-532-5p	GYS1	-0.563009621803532
				hsa-miR-575	C1orf55	0.556688213174226		hsa-miR-1915	HABP4	-0.576003454754935
				hsa-miR-210	C1orf93	0.544799080073255		hsa-miR-212	HABP4	0.570282215078651
				hsa-miR-378	C1QA	0.628809655693172		hsa-miR-155	HADH	-0.706529306377045
				hsa-miR-505	C1QA	-0.58826675770983		hsa-miR-222	HADH	-0.605068861583463
				hsa-miR-155	C1QB	-0.623866818407463		hsa-miR-132	HADHB	-0.576907814205326
				hsa-miR-185	C1QB	0.580392064251025		hsa-miR-212	HADHB	-0.617503970629429
				hsa-miR-505	C1QB	-0.553841039389096		hsa-miR-155	HARS	0.608996131467666
				hsa-miR-155	C1QC	-0.691765642098868		hsa-miR-3663-3p	HCFC1	-0.589358516802958
				hsa-miR-505	C1QC	-0.552433553264378		hsa-miR-212	HDAC4	-0.591041287935636
				hsa-miR-1228	C1QTNF1	-0.571920070914989		hsa-miR-132	HEATR5B	-0.57446131901282
				hsa-miR-1234	C1QTNF1	-0.551892067546457		hsa-miR-155	HEATR5B	-0.618299920182018
				hsa-miR-1280	C1QTNF1	-0.554218981981643		hsa-miR-212	HEATR5B	-0.600943148329053
				hsa-miR-155	C1QTNF1	0.831965517590651		hsa-miR-3663-3p	HEATR5B	0.591078153232355
				hsa-miR-200c	C1QTNF1	-0.56626849209896		hsa-miR-3156-5p	HECTD1	-0.569532623660468
				hsa-miR-222	C1QTNF1	0.554210076657943		hsa-miR-27b	HERC2	0.626086453673983
				hsa-miR-940	C1QTNF1	-0.588375899197337		hsa-miR-132	HEXB	-0.620908468488357
				hsa-miR-132	C1RL	-0.604525208155417		hsa-miR-155	HEXB	-0.70058496349049
				hsa-miR-212	C1RL	-0.572790046490417		hsa-miR-212	HEXB	-0.630883337646803
				hsa-miR-320d	C1RL	-0.579856267730736		hsa-miR-132	HIBADH	-0.640932144232703
				hsa-miR-320e	C1RL	-0.561093695759945		hsa-miR-155	HIBADH	-0.655975163389822
				hsa-miR-155	C1S	0.726073051962418		hsa-miR-1915	HIBADH	0.567638687515744
				hsa-miR-222	C1S	0.564091657241418		hsa-miR-212	HIBADH	-0.65726720659312
				hsa-miR-155	C20orf11	-0.542353691585815		hsa-miR-222	HIBADH	-0.601352871768332
				hsa-miR-1228	C20orf117	0.58331571187076		hsa-miR-3663-3p	HIBADH	0.687080202752818
				hsa-miR-1234	C20orf117	0.540763477390774		hsa-miR-155	HIGD1A	0.574142378631619
				hsa-miR-1238	C20orf117	0.56161500891905		hsa-miR-155	HIST1H2BD	0.674319385134206
				hsa-miR-1281	C20orf117	0.558581989158835		hsa-miR-155	HIST1H2BK	0.592146382467852
				hsa-miR-146a	C20orf117	-0.543248142123527		hsa-miR-155	HIST2H2AC	0.565744392972184
				hsa-miR-155	C20orf117	-0.76138084459068		hsa-miR-186	HIST2H2AC	0.571245154002766
				hsa-miR-1825	C20orf117	0.571586344850878		hsa-miR-222	HIST2H2AC	0.563592125051705
				hsa-miR-186	C20orf117	-0.568874734601972		hsa-miR-132	HIVEP1	0.599494584237079
				hsa-miR-197	C20orf117	0.561984588958912		hsa-miR-155	HIVEP1	0.604187860732913
				hsa-miR-222	C20orf117	-0.626071120725532		hsa-miR-212	HIVEP1	0.690532435819356
				hsa-miR-940	C20orf117	0.565853798036982		hsa-miR-155	HLA-DMA	-0.709112795764125
				hsa-miR-155	C20orf20	-0.591425731166208		hsa-miR-222	HLA-DMA	-0.621987878100352
				hsa-miR-1307	C20orf27	-0.567416510465744		hsa-miR-155	HLA-DMB	-0.736318370025611
				hsa-miR-155	C20orf27	-0.747071728805381		hsa-miR-222	HLA-DMB	-0.635734639063449
				hsa-miR-186	C20orf27	-0.610822325686509		hsa-miR-155	HLA-DPB1	-0.612381949076264
				hsa-miR-4261	C20orf29	-0.593167418674282		hsa-miR-155	HLA-DRB1	-0.579674612006089
				hsa-miR-1275	C20orf30	0.556764552930155		hsa-miR-155	HLA-F	0.605835397534103
				hsa-miR-146a	C20orf30	0.548186177780313		hsa-miR-222	HLA-G	0.587078761596671
				hsa-miR-155	C20orf30	0.669468163067128		hsa-miR-212	HMGB2	-0.570855879190729
				hsa-miR-200c	C20orf30	-0.635227304352201		hsa-miR-132	HOMER2	0.566644962655163
				hsa-miR-1228	C20orf72	0.539446445721903		hsa-miR-155	HS3ST1	-0.579923202458172
				hsa-miR-1280	C20orf72	0.541541604418063		hsa-miR-222	HS3ST1	-0.571179784324921
				hsa-miR-129-3p	C20orf72	-0.574701416285574		hsa-miR-652	HTATIP2	0.60586196559315
				hsa-miR-155	C20orf72	-0.621673524839189		hsa-miR-155	HVCN1	-0.619829473754283
				hsa-miR-940	C20orf72	0.551493495600199		hsa-miR-3663-3p	HYOU1	-0.597294809247748
				hsa-let-7b	C20orf94	-0.543482766515036		hsa-miR-155	ICAM3	-0.728957303829126
				hsa-miR-186	C21orf33	-0.627439836041165		hsa-miR-212	ICAM3	-0.582819909400767
				hsa-let-7c	C21orf59	-0.545865995803032		hsa-miR-3663-3p	ICOSLG	-0.60690953846181
				hsa-miR-155	C22orf30	-0.545376085616038		hsa-miR-132	ID2	0.678566947467959
				hsa-miR-155	C22orf39	0.544655942021559		hsa-miR-155	ID2	0.595648810181981
				hsa-miR-1228	C22orf9	0.543519602289358		hsa-miR-212	ID2	0.707782151474125
				hsa-miR-1281	C22orf9	0.575355791297395		hsa-miR-155	IDH2	-0.649691406058919
				hsa-miR-155	C22orf9	-0.689233631433023		hsa-miR-212	IDH2	-0.696878342879337
				hsa-miR-505	C22orf9	-0.589439819418822		hsa-miR-155	IDUA	-0.642815838310961
				hsa-miR-940	C22orf9	0.55688033684412		hsa-miR-146a	IER5	0.567322069846033
				hsa-miR-1228	C2CD2	0.613419979901733		hsa-miR-155	IER5	0.574626809244086
				hsa-miR-1234	C2CD2	0.590840970976001		hsa-miR-212	IFI16	-0.571649953203222
				hsa-miR-1238	C2CD2	0.624457115019659		hsa-miR-1307	IFI27	0.564157387940966
				hsa-miR-1280	C2CD2	0.543654663410742		hsa-miR-148b	IFI27L2	0.564945467320231
				hsa-miR-1281	C2CD2	0.548803957144292		hsa-miR-132	IFI30	0.599101385166077
				hsa-miR-155	C2CD2	-0.68134185254151		hsa-miR-212	IFI30	0.574590504990286
				hsa-miR-29a	C2CD2	-0.542432888285407		hsa-miR-642b	IFT122	-0.566310732018786
				hsa-miR-940	C2CD2	0.591835744081944		hsa-miR-212	IFT74	-0.565668843973661
				hsa-miR-146a	C2orf28	0.541797279775361		hsa-miR-155	IGFBP3	0.647338315519106
				hsa-miR-1275	C2orf55	-0.549246562063381		hsa-miR-222	IGFBP3	0.603004443322429
				hsa-miR-155	C2orf7	-0.70271558065135		hsa-miR-132	IGSF3	0.6388725816706
				hsa-miR-186	C2orf7	-0.601334686716614		hsa-miR-155	IGSF3	0.646733601433089
				hsa-miR-222	C2orf7	-0.60406496838221		hsa-miR-212	IGSF3	0.676184128382131
				hsa-miR-361-5p	C2orf7	0.600660839150994		hsa-miR-155	IL15	0.621491186628532
				hsa-miR-155	C2orf89	0.570440417900922		hsa-miR-132	IL18R1	0.623215576252541
				hsa-miR-155	C3orf14	0.661170191082624		hsa-miR-212	IL18R1	0.646827439754896
				hsa-miR-186	C3orf14	0.57701499747679		hsa-miR-155	IL27RA	-0.666090652570873
				hsa-miR-7	C3orf38	0.569372621598058		hsa-miR-222	IL27RA	-0.578244123381282
				hsa-miR-155	C3orf52	0.549322804897688		hsa-miR-132	IL2RA	0.640872549085074
				hsa-miR-874	C3orf70	0.549156603113242		hsa-miR-155	IL2RA	0.67831264269994
				hsa-miR-185	C3orf71	-0.544914026097347		hsa-miR-212	IL2RA	0.692689736505734
				hsa-miR-361-5p	C3orf71	-0.568152156769314		hsa-miR-132	IL32	0.639391458045713
				hsa-miR-155	C3orf75	0.726190662761272		hsa-miR-155	IL32	0.581716754704366
				hsa-miR-155	C4orf32	-0.690252483885029		hsa-miR-212	IL32	0.722976882296996
				hsa-miR-92a	C4orf34	-0.562804022442403		hsa-miR-155	IL4I1	0.595061017189552
				hsa-miR-155	C4orf46	0.629992095041495		hsa-miR-212	IL4I1	0.644932682470315
				hsa-miR-186	C4orf46	0.577039901123082		hsa-miR-155	IL9	0.656809563946287
				hsa-miR-155	C4orf50	-0.579653131710345		hsa-miR-222	IL9	0.571990711182439
				hsa-miR-378	C5	0.620887426023677		hsa-miR-155	ILVBL	-0.595282354030148
				hsa-miR-1228	C5AR1	-0.562491621330373		hsa-miR-155	IMPA2	-0.639685004733919
				hsa-miR-1238	C5AR1	-0.539094249892974		hsa-miR-132	INPP1	-0.56523477367573
				hsa-miR-155	C5AR1	0.593975920658895		hsa-miR-1915	INSIG1	-0.672538839267818
				hsa-miR-29a	C5AR1	0.590684205464583		hsa-miR-3663-3p	INSIG1	-0.577903184159267
				hsa-miR-155	C5orf20	-0.709168618068002		hsa-miR-155	INSM1	0.617713697517227
				hsa-miR-103a	C5orf25	-0.546215469770863		hsa-miR-212	INSM1	0.578707953599452
				hsa-miR-155	C5orf30	0.602401859313735		hsa-miR-222	INSM1	0.564027701752811
				hsa-miR-155	C5orf32	0.715626329986934		hsa-miR-212	INSM2	0.578521896730101
				hsa-miR-505	C5orf32	0.608770881856941		hsa-miR-132	IQCG	0.59851495869766
				hsa-miR-1228	C5orf62	-0.566348022514594		hsa-miR-155	IQCG	0.59492870455469
				hsa-miR-1234	C5orf62	-0.538767180348297		hsa-miR-212	IQCG	0.663350608527952
				hsa-miR-1238	C5orf62	-0.601705684307025		hsa-miR-212	IRAK4	-0.601390930820861
				hsa-miR-29a	C5orf62	0.54113640114435		hsa-miR-155	ISG20	0.629392198291007
				hsa-miR-940	C5orf62	-0.554905531643168		hsa-miR-212	ITGA4	0.642172535297627
				hsa-miR-155	C6orf108	-0.568416490237325		hsa-miR-155	ITGAM	-0.704423012526885
				hsa-miR-186	C6orf117	-0.543123604909822		hsa-miR-199b-5p	ITGAM	0.599964765823431
				hsa-miR-146a	C6orf136	0.552541552726722		hsa-miR-212	ITGAM	-0.604042776139149
				hsa-miR-103a	C6orf145	0.67219397188628		hsa-miR-222	ITGAM	-0.64280102257985
				hsa-miR-330-3p	C6orf145	0.542905347137002		hsa-miR-155	ITGAX	-0.672692155430287
				hsa-miR-93	C6orf145	0.55508496784368		hsa-miR-212	ITGAX	-0.592613922919506
				hsa-miR-129-3p	C6orf153	0.606911791366149		hsa-miR-155	ITGB2	-0.643973471251803
				hsa-miR-1228	C6orf223	-0.549194334676698		hsa-miR-212	ITGB2	-0.578222541973504
				hsa-miR-155	C6orf223	0.641185593987751		hsa-miR-132	JMY	-0.584913810438603
				hsa-miR-4310	C6orf223	-0.541221031937376		hsa-miR-155	JMY	-0.594955056192293
				hsa-miR-940	C6orf223	-0.562025921356044		hsa-miR-212	JMY	-0.601942320705611
				hsa-miR-4291	C6orf25	-0.584633089404039		hsa-miR-3663-3p	JMY	0.568961097464085
				hsa-miR-503	C6orf47	-0.579389637207993		hsa-miR-155	KAT2A	-0.584880416070501
				hsa-miR-7	C6orf47	0.599011258799925		hsa-miR-212	KAT2A	-0.583530152026954
				hsa-miR-1228	C6orf48	-0.544502591337606		hsa-miR-155	KCNK6	-0.621163153051094
				hsa-miR-155	C6orf48	0.612523917840802		hsa-miR-155	KCTD12	-0.593250404062767
				hsa-miR-221	C6orf97	0.567996522850956		hsa-miR-155	KCTD6	-0.583137336684421
				hsa-miR-1228	C7orf23	0.549905258514843		hsa-miR-181b	KDELC2	-0.571411946648618
				hsa-miR-155	C7orf23	-0.831473984119945		hsa-miR-132	KDELR1	-0.621384774973204
				hsa-miR-222	C7orf23	-0.596167275675132		hsa-miR-155	KDELR1	-0.706968340144397
				hsa-miR-1228	C7orf57	0.540840100429627		hsa-miR-212	KDELR1	-0.683346915942318
				hsa-miR-1238	C7orf57	0.558011169845343		hsa-miR-181b	KDELR2	-0.566791812570091
				hsa-miR-146a	C7orf57	-0.585556284568575		hsa-miR-155	KEAP1	0.593034902531411
				hsa-miR-155	C7orf57	-0.714099538476377		hsa-miR-148b	KIAA0247	0.574814709826189
				hsa-miR-222	C7orf57	-0.577227642778802		hsa-miR-155	KIAA0247	-0.62437696116098
				hsa-miR-1228	C7orf68	-0.647412052344023		hsa-miR-212	KIAA0247	-0.56585750307378
				hsa-miR-1234	C7orf68	-0.609369072299371		hsa-miR-148b	KIAA0391	0.564599558236619
				hsa-miR-1238	C7orf68	-0.60603741199751		hsa-miR-155	KIAA0391	-0.631223553895098
				hsa-miR-1281	C7orf68	-0.559263929734083		hsa-miR-362-5p	KIAA0391	0.563791159404655
				hsa-miR-155	C7orf68	0.613843163937518		hsa-miR-155	KIAA0494	-0.567709084609879
				hsa-miR-940	C7orf68	-0.600852735544759		hsa-miR-132	KIAA0513	0.662635469886437
				hsa-miR-155	C8orf33	-0.669622039847777		hsa-miR-212	KIAA0513	0.629358252105553
				hsa-miR-19a	C8orf76	-0.562436683586567		hsa-miR-132	KIAA0922	0.747177154553809
				hsa-miR-155	C9orf10OS	0.545892600708031		hsa-miR-155	KIAA0922	0.586792153469841
				hsa-miR-222	C9orf140	-0.544173860225729		hsa-miR-212	KIAA0922	0.743146103599424
				hsa-miR-155	C9orf21	0.570321094273351		hsa-miR-222	KIAA0922	0.568838697201632
				hsa-miR-186	C9orf24	-0.570262176884804		hsa-miR-155	KIAA1274	-0.565258730334617
				hsa-miR-212	C9orf24	-0.61980257544609		hsa-miR-155	KIAA1797	-0.590479788878764
				hsa-miR-221	C9orf24	0.609092206071384		hsa-miR-132	KIF13B	0.578818244386768
				hsa-miR-378	C9orf24	0.659438085609181		hsa-miR-212	KIF13B	0.617017629491338
				hsa-miR-505	C9orf24	-0.550314232372806		hsa-miR-132	KIF21B	0.589975825253117
				hsa-miR-1228	C9orf3	0.586691918599126		hsa-miR-155	KLF6	0.611915636188722
				hsa-miR-155	C9orf3	-0.692763084315853		hsa-miR-132	KLHL12	-0.622804599221082
				hsa-miR-1307	C9orf91	0.548790945388968		hsa-miR-212	KLHL12	-0.624709248486964
				hsa-miR-155	C9orf91	0.607407952436756		hsa-miR-155	KLHL22	-0.63615535311657
				hsa-miR-186	C9orf91	0.612740825673017		hsa-miR-222	KLHL22	-0.583557545359297
				hsa-miR-212	C9orf91	0.617293364935376		hsa-miR-155	KLHL8	-0.618246861158855
				hsa-miR-27a	C9orf91	-0.594426321455462		hsa-miR-3663-3p	KPNA4	-0.580813695192286
				hsa-miR-371-5p	C9orf91	0.53983866939388		hsa-miR-1915	KPNB1	-0.60104281516846
				hsa-miR-378	C9orf91	-0.602721109068237		hsa-miR-3663-3p	KPNB1	-0.698266258770314
				hsa-miR-505	C9orf91	0.608894973909725		hsa-miR-4271	KPNB1	-0.569473687639124
				hsa-miR-155	C9orf93	-0.605289451264758		hsa-miR-4281	KPNB1	-0.575351865308017
				hsa-miR-186	C9orf93	-0.549803490664713		hsa-miR-762	KPNB1	-0.595447081205935
				hsa-miR-378	C9orf93	0.562131076400606		hsa-miR-193b	KRT17	-0.568747843184519
				hsa-miR-1228	C9orf95	-0.548281385350505		hsa-miR-132	L3MBTL4	0.567558717311685
				hsa-miR-155	C9orf95	0.570609813539233		hsa-miR-148b	L3MBTL4	-0.610251574879752
				hsa-miR-505	C9orf95	0.600786699380641		hsa-miR-155	L3MBTL4	0.662401825450405
				hsa-miR-1275	C9orf98	0.553167011171358		hsa-miR-212	L3MBTL4	0.580302607409672
				hsa-miR-155	C9orf98	0.683860213981025		hsa-miR-1307	LACTB	0.588348064272997
				hsa-miR-186	CA11	-0.628473995801525		hsa-miR-27b	LACTB	-0.597666866451097
				hsa-miR-212	CA11	-0.599363186272378		hsa-miR-132	LAD1	0.646544267646202
				hsa-miR-221	CA11	0.596644519193273		hsa-miR-212	LAD1	0.700829707748924
				hsa-miR-27a	CA11	0.597643010680292		hsa-miR-155	LAMB2	-0.568340735015629
				hsa-miR-378	CA11	0.641797141673563		hsa-miR-132	LAMP3	0.580362223210603
				hsa-miR-193b	CA2	0.540462766740252		hsa-miR-155	LAMP3	0.611561654980742
				hsa-miR-378	CA5A	0.605864132816312		hsa-miR-212	LAMP3	0.656179810570514
				hsa-miR-222	CABC1	0.602166887881286		hsa-miR-132	LAPTM5	-0.587247033382606
				hsa-miR-365	CABC1	0.550999681844897		hsa-miR-155	LAPTM5	-0.717777226321888
				hsa-miR-4323	CABC1	-0.539293815987903		hsa-miR-212	LAPTM5	-0.649647044721335
				hsa-miR-103a	CALCRL	0.579985131377369		hsa-miR-132	LASS6	0.648381515154341
				hsa-miR-155	CALM1	-0.63780206128959		hsa-miR-212	LASS6	0.679050557291139
				hsa-miR-197	CALM1	0.574452479533815		hsa-miR-762	LAYN	-0.563671673708555
				hsa-miR-222	CALM1	-0.573068372398309		hsa-miR-155	LDHA	0.570550375145171
				hsa-miR-155	CAMK1	-0.778748553038505		hsa-miR-222	LEMD2	0.567226567716227
				hsa-miR-222	CAMK1	-0.565039958061177		hsa-miR-181b	LEPREL1	-0.580919902634951
				hsa-miR-155	CAMK1G	0.638353419214846		hsa-miR-132	LEPROTL1	-0.56868064268208
				hsa-miR-186	CAMK1G	0.560014657624773		hsa-miR-155	LEPROTL1	-0.649983186929865
				hsa-miR-1228	CAMK2D	0.59178648065666		hsa-miR-212	LEPROTL1	-0.641310385481595
				hsa-miR-1234	CAMK2D	0.558892671789351		hsa-miR-155	LGALS9	0.59976666024953
				hsa-miR-1238	CAMK2D	0.565509517853292		hsa-miR-212	LGALS9	0.56316600382098
				hsa-miR-155	CAMK2D	-0.658906889912457		hsa-miR-132	LIMCH1	0.693705185135199
				hsa-miR-29a	CAMK2D	-0.574910316573528		hsa-miR-155	LIMCH1	0.620871377014882
				hsa-miR-940	CAMK2D	0.563400708515198		hsa-miR-212	LIMCH1	0.771134994836345
				hsa-miR-146a	CAMLG	0.570306832051611		hsa-miR-132	LMNB1	0.578996161168239
				hsa-miR-146a	CAMSAP1L1	-0.5589959825762		hsa-miR-155	LMNB1	0.619926954071524
				hsa-miR-155	CAMSAP1L1	-0.663741840083624		hsa-miR-212	LMNB1	0.658211956675006
				hsa-miR-155	CANT1	0.547252257091119		hsa-miR-222	LMNB1	0.564713389459336
				hsa-miR-200c	CANT1	-0.542981724859586		hsa-miR-132	LMNB2	0.629305703459379
				hsa-miR-501-5p	CANT1	0.572599764666242		hsa-miR-212	LMNB2	0.623465371264473
				hsa-miR-146a	CANX	-0.581897189833532		hsa-miR-155	LOC285550	-0.580427650331678
				hsa-miR-155	CANX	-0.585509237511488		hsa-miR-222	LOC285550	-0.597312113947266
				hsa-miR-222	CANX	-0.630977350291428		hsa-miR-155	LOC653888	-0.578774867811379
				hsa-miR-146a	CAPN2	-0.596211774286192		hsa-miR-29a	LOC653888	-0.605193065268748
				hsa-miR-155	CAPZA2	-0.551517411834439		hsa-miR-132	LONRF2	0.656129211948478
				hsa-miR-155	CARD8	-0.578393643822791		hsa-miR-1915	LONRF2	-0.589518382471545
				hsa-miR-1228	CARD9	0.601228614799139		hsa-miR-212	LONRF2	0.632509326052241
				hsa-miR-1234	CARD9	0.540383308776348		hsa-miR-3663-3p	LONRF2	-0.590455274593843
				hsa-miR-1238	CARD9	0.582248127903259		hsa-miR-155	LRCH3	0.574962162087115
				hsa-miR-1280	CARD9	0.582671799211787		hsa-miR-212	LRCH3	0.605435949152028
				hsa-miR-1281	CARD9	0.551009387823093		hsa-miR-132	LRCH4	0.601230946513624
				hsa-miR-155	CARD9	-0.77710013752817		hsa-miR-212	LRCH4	0.586442367880858
				hsa-miR-940	CARD9	0.577115356236302		hsa-miR-155	LRP3	-0.64146437343036
				hsa-miR-155	CARM1	-0.710538797500443		hsa-miR-212	LRP3	-0.609652632780614
				hsa-miR-371-5p	CASC4	0.544061189916616		hsa-miR-132	LRP8	0.675349613659678
				hsa-miR-186	CASP3	0.556189926517189		hsa-miR-155	LRP8	0.596205808305887
				hsa-miR-193b	CASP6	-0.559395136211457		hsa-miR-212	LRP8	0.712246666639049
				hsa-miR-155	CASZ1	0.61270440018379		hsa-miR-155	LRRC33	-0.675584109669382
				hsa-miR-155	CBARA1	-0.561290506325645		hsa-miR-222	LRRC33	-0.585412890931454
				hsa-miR-186	CBARA1	-0.542663333884452		hsa-miR-132	LRRCC1	-0.615866144120079
				hsa-miR-155	CBFB	-0.717192626050182		hsa-miR-212	LRRCC1	-0.662622124292948
				hsa-miR-222	CBFB	-0.569127449721175		hsa-miR-155	LST1	-0.616751626627022
				hsa-miR-1228	CBL	0.598993784245289		hsa-miR-222	LST1	-0.583030778188835
				hsa-miR-1238	CBL	0.575199752988334		hsa-miR-155	LTB	-0.591144790385237
				hsa-miR-1280	CBL	0.586449336437292		hsa-miR-222	LTB	-0.617121801220962
				hsa-miR-1281	CBL	0.547975284132329		hsa-miR-132	LY75	0.63198975917435
				hsa-miR-155	CBL	-0.828935816673482		hsa-miR-155	LY75	0.637691946570409
				hsa-miR-222	CBL	-0.555348588570989		hsa-miR-212	LY75	0.652888188185396
				hsa-miR-940	CBL	0.590017155176322		hsa-miR-212	LY96	-0.58031413338219
				hsa-miR-155	CBX4	0.706679946767754		hsa-miR-155	LYN	0.599704918082552
				hsa-miR-222	CBX4	0.602558307275017		hsa-miR-3663-3p	LYRM1	-0.562838748737224
				hsa-miR-186	CBX7	-0.566436083670272		hsa-miR-132	LYRM5	-0.580333373785449
				hsa-miR-27a	CBX7	0.548304349181767		hsa-miR-212	LYRM5	-0.610545972223233
				hsa-miR-155	CCBL2	0.628758798748954		hsa-miR-132	MAF	-0.573040306797492
				hsa-miR-186	CCBL2	0.550436265237281		hsa-miR-132	MAMLD1	0.60336629847236
				hsa-miR-1234	CCDC104	-0.574420312052211		hsa-miR-212	MAMLD1	0.595284588721198
				hsa-miR-1238	CCDC104	-0.597993141082603		hsa-miR-155	MAN2A2	-0.649266381904928
				hsa-miR-1281	CCDC104	-0.603782128539657		hsa-miR-212	MAN2A2	-0.61763678097671
				hsa-miR-146a	CCDC104	0.641341885478631		hsa-miR-155	MAN2B1	-0.606106512261613
				hsa-miR-1539	CCDC104	-0.540731791392108		hsa-miR-212	MAOA	-0.578007731690066
				hsa-miR-4310	CCDC104	-0.581009787826581		hsa-miR-155	MAP3K1	0.690668403555636
				hsa-miR-550a	CCDC104	-0.543981419512502		hsa-miR-132	MAP3K14	0.660991118285346
				hsa-miR-766	CCDC104	-0.546648944613903		hsa-miR-155	MAP3K14	0.651889474514043
				hsa-miR-146a	CCDC115	0.612262330650994		hsa-miR-212	MAP3K14	0.683560846960564
				hsa-miR-155	CCDC115	0.569819422556358		hsa-miR-155	MAP3K6	0.602569730529929
				hsa-miR-222	CCDC115	0.539000933538734		hsa-miR-155	MAP4K1	-0.61506763935967
				hsa-miR-155	CCDC121	-0.550280107341968		hsa-miR-132	MAP4K2	-0.605893922033488
				hsa-miR-132	CCDC14	-0.547917107429378		hsa-miR-155	MAP4K2	-0.606002984918739
				hsa-miR-212	CCDC14	-0.59025449710032		hsa-miR-212	MAP4K2	-0.655325546828699
				hsa-miR-221	CCDC14	0.54155432686696		hsa-miR-132	MAP4K4	0.61523984425219
				hsa-miR-371-5p	CCDC14	-0.571200955510843		hsa-miR-212	MAP4K4	0.670713710955769
				hsa-miR-210	CCDC151	0.610716507194079		hsa-miR-148b	MAPK13	-0.56846845548028
				hsa-miR-365	CCDC28A	0.561485622586671		hsa-miR-155	MAPK13	0.733540721296786
				hsa-miR-1275	CCDC28B	0.585327845573287		hsa-miR-199b-5p	MAPK13	-0.57562997460582
				hsa-miR-155	CCDC28B	0.545531738686149		hsa-miR-212	MAPK13	0.579530238202669
				hsa-miR-185	CCDC28B	-0.559337587452525		hsa-miR-222	MAPK13	0.627107577362976
				hsa-miR-186	CCDC28B	0.544965892564139		hsa-miR-3665	MAPKAPK2	-0.572977670607017
				hsa-miR-505	CCDC28B	0.577478362503035		hsa-miR-193b	MAPRE1	-0.564028079360318
				hsa-miR-7	CCDC28B	0.556273215435599		hsa-miR-212	MARCKS	0.574440869547997
				hsa-miR-155	CCDC45	0.579828924377447		hsa-miR-212	MARCKSL1	0.671341283267641
				hsa-miR-155	CCDC46	-0.696474583965827		hsa-miR-212	MBD2	0.643349894714268
				hsa-miR-505	CCDC46	-0.552326132923309		hsa-miR-155	MCCC1	-0.599652458773248
				hsa-miR-1280	CCDC50	-0.613852367571038		hsa-miR-222	MCCC1	-0.61422630810923
				hsa-miR-155	CCDC50	0.705247457087076		hsa-miR-212	MCM2	0.565890402696616
				hsa-miR-155	CCDC62	-0.585289129705188		hsa-miR-212	MCM5	0.571074558269379
				hsa-let-7a	CCDC68	0.553222803794335		hsa-miR-193b	MCM7	0.574347451263392
				hsa-miR-25	CCDC68	0.586109017554177		hsa-miR-155	MCOLN1	-0.606924167466336
				hsa-miR-29a	CCDC68	0.621759713634461		hsa-miR-132	MCOLN2	0.581333856609006
				hsa-miR-155	CCDC71	0.555855196277372		hsa-miR-212	MCOLN2	0.598894418349979
				hsa-miR-1228	CCDC86	0.566807530578881		hsa-miR-212	MED12	0.626604987404694
				hsa-miR-155	CCDC86	-0.70988333760915		hsa-miR-212	MED23	-0.615612103806378
				hsa-miR-186	CCDC86	-0.630078515483165		hsa-miR-3663-3p	MEX3A	-0.611167278106943
				hsa-miR-505	CCDC86	-0.590058398346244		hsa-miR-155	MFNG	-0.591319859848159
				hsa-miR-940	CCDC86	0.557160185989795		hsa-miR-155	MFSD1	-0.644310809765054
				hsa-miR-766	CCL14	-0.5407039970531		hsa-miR-132	MFSD6	-0.578956477183597
				hsa-miR-155	CCL18	0.594622122073106		hsa-miR-155	MFSD6	-0.601431616259462
				hsa-miR-155	CCL19	0.607216998275045		hsa-miR-1915	MFSD6	0.594201082055929
				hsa-miR-361-5p	CCL2	-0.568207172975335		hsa-miR-212	MFSD6	-0.577139079094393
				hsa-miR-1234	CCL20	-0.539310593641312		hsa-miR-3663-3p	MFSD6	0.604303214860723
				hsa-miR-1280	CCL20	-0.578284435723128		hsa-miR-132	MGLL	0.575155669969588
				hsa-miR-155	CCL20	0.654323494408144		hsa-miR-155	MGLL	0.610296435657499
				hsa-miR-29a	CCL20	0.539571175837845		hsa-miR-212	MGLL	0.563449775817334
				hsa-miR-940	CCL20	-0.562843074005791		hsa-miR-222	MGLL	0.574195874422187
				hsa-miR-132	CCL22	0.643326692171055		hsa-miR-132	MGMT	-0.571592659720472
				hsa-miR-212	CCL22	0.710554699475159		hsa-miR-212	MGMT	-0.603919430543111
				hsa-miR-221	CCL22	-0.684036097725607		hsa-miR-362-5p	MGMT	0.572185160384519
				hsa-miR-378	CCL22	-0.706315830703731		hsa-miR-362-5p	MGRN1	-0.564875435561003
				hsa-miR-93	CCL22	0.581343358254031		hsa-miR-155	MGST2	-0.640932707709203
				hsa-miR-146a	CCL23	0.578957563340364		hsa-miR-212	MGST2	-0.588047597134368
				hsa-miR-200c	CCL23	-0.547500742772513		hsa-miR-155	MID2	-0.579217843402415
				hsa-miR-766	CCL23	-0.618958876433751		hsa-miR-212	MID2	-0.607192186744221
				hsa-miR-212	CCL26	-0.542483434663134		hsa-miR-155	MKKS	-0.58604749722387
				hsa-miR-1228	CCL3L1	-0.544365670928395		hsa-miR-155	MLEC	-0.633041443788293
				hsa-miR-1234	CCL3L1	-0.54513805778484		hsa-miR-212	MLLT11	0.57382393423593
				hsa-miR-1238	CCL3L1	-0.562468209720398		hsa-miR-212	MLST8	0.572280076986039
				hsa-miR-155	CCL3L1	0.542265588687677		hsa-miR-3663-3p	MMP7	0.577135004242881
				hsa-miR-29a	CCL3L3	0.562369219280366		hsa-miR-762	MMP7	0.62317916171499
				hsa-miR-330-3p	CCL3L3	0.548408005409792		hsa-miR-155	MOBKL2B	-0.647549838915124
				hsa-miR-1234	CCL4L1	-0.543794973321987		hsa-miR-222	MOBKL2B	-0.588014593683231
				hsa-miR-1238	CCL4L1	-0.550182382361228		hsa-miR-132	MPP1	-0.59628056713792
				hsa-miR-1228	CCL5	-0.57793190119189		hsa-miR-212	MPP1	-0.605844073979591
				hsa-miR-1234	CCL5	-0.539993795538547		hsa-miR-132	MPPE1	-0.563336893369208
				hsa-miR-1238	CCL5	-0.548449643697018		hsa-miR-1915	MPPE1	0.606340187955744
				hsa-miR-1275	CCL5	0.549341175060752		hsa-miR-212	MPPE1	-0.597567936174515
				hsa-miR-1307	CCL5	0.541465056875057		hsa-miR-3663-3p	MPPE1	0.655753054334623
				hsa-miR-155	CCL5	0.792538310574425		hsa-miR-4271	MPPE1	0.587695424796383
				hsa-miR-186	CCL5	0.636312737045234		hsa-miR-3663-3p	MPV17	0.580253622874708
				hsa-miR-222	CCL5	0.603298796403616		hsa-miR-155	MREG	0.656183060205167
				hsa-miR-26a	CCL5	0.55871816247802		hsa-miR-222	MREG	0.644002242303708
				hsa-miR-421	CCL5	-0.557670192436761		hsa-miR-132	MRPL42	0.575052907654937
				hsa-miR-7	CCL5	0.543724967280827		hsa-miR-155	MRPL42	0.569589565577472
				hsa-miR-940	CCL5	-0.589319193499952		hsa-miR-212	MRPL42	0.602017495996969
				hsa-miR-155	CCM2	0.699511559617559		hsa-miR-181b	MRPL45	0.624929986899719
				hsa-miR-505	CCM2	0.599696128326227		hsa-miR-155	MRPL46	0.619790330380546
				hsa-miR-193b	CCNB1	-0.54160711251621		hsa-miR-155	MRPS11	0.567269991017669
				hsa-miR-1307	CCNB1IP1	-0.555582616430753		hsa-miR-1915	MRPS31	0.604372830582326
				hsa-miR-132	CCNB1IP1	-0.564079810142182		hsa-miR-2861	MRPS31	0.562932229758103
				hsa-miR-155	CCNB1IP1	-0.540644934136751		hsa-miR-132	MRPS6	0.663817664251112
				hsa-miR-212	CCNB1IP1	-0.610375720231307		hsa-miR-155	MRPS6	0.660021163598694
				hsa-miR-155	CCND1	-0.566491449545742		hsa-miR-212	MRPS6	0.675532185861141
				hsa-miR-1228	CCND3	0.598424746329639		hsa-miR-155	MS4A6A	-0.572365474952964
				hsa-miR-1234	CCND3	0.562832663019932		hsa-miR-155	MSRA	-0.604105200316558
				hsa-miR-1238	CCND3	0.573377887183993		hsa-miR-132	MTCP1	-0.588318478770804
				hsa-miR-1281	CCND3	0.544981778153707		hsa-miR-212	MTCP1	-0.587012032357495
				hsa-miR-155	CCND3	-0.729167193357407		hsa-miR-155	MTFMT	-0.562798952574131
				hsa-miR-940	CCND3	0.577575399492583		hsa-miR-132	MTHFD2	0.636954648470034
				hsa-miR-1228	CCNDBP1	-0.581727243607862		hsa-miR-155	MTHFD2	0.642217183876231
				hsa-miR-1234	CCNDBP1	-0.568615617667667		hsa-miR-212	MTHFD2	0.703398180042046
				hsa-miR-1238	CCNDBP1	-0.571852576098938		hsa-miR-155	MTHFS	0.60065767682386
				hsa-miR-155	CCNDBP1	0.635410126267247		hsa-miR-212	MTHFS	0.613576671031506
				hsa-miR-940	CCNDBP1	-0.56528960846683		hsa-miR-132	MTSS1	0.621144401643561
				hsa-miR-155	CCNE1	-0.687754712568704		hsa-miR-212	MTSS1	0.644218662072016
				hsa-miR-185	CCNE1	0.590378881427129		hsa-miR-4271	MVD	-0.5766870775559
				hsa-miR-26a	CCNE1	-0.543376269953736		hsa-miR-3663-3p	MVK	-0.587004129584266
				hsa-miR-1228	CCNH	0.569743210714568		hsa-miR-212	MYB	0.574823463074697
				hsa-miR-1238	CCNH	0.557408231183262		hsa-miR-148b	MYCBP	0.569410858220229
				hsa-miR-155	CCNH	-0.781673822520165		hsa-miR-155	MYCBP	-0.654425337384504
				hsa-miR-222	CCNH	-0.577282868842476		hsa-miR-27b	MYCBP	0.629568364044274
				hsa-miR-1228	CCR1	0.539755593340576		hsa-miR-132	MYLIP	0.588376790910594
				hsa-miR-155	CCR1	-0.704849256568378		hsa-miR-212	MYLIP	0.62594876973058
				hsa-miR-505	CCR1	-0.543107945303472		hsa-miR-193b	MYO1E	-0.56404533741327
				hsa-miR-1275	CCR7	0.55906735277552		hsa-miR-155	MYO1G	0.62392647119457
				hsa-miR-155	CCR7	0.696546341796918		hsa-miR-155	N4BP2L1	0.605980276987763
				hsa-miR-371-5p	CCR7	0.566871586334961		hsa-miR-212	N4BP2L1	0.563778591083297
				hsa-miR-505	CCR7	0.600178389339909		hsa-miR-155	NAGA	-0.694916939995098
				hsa-miR-146a	CCS	0.545216256439334		hsa-miR-155	NASP	-0.606863667781128
				hsa-miR-17	CCT2	0.550146852771616		hsa-miR-155	NAT6	0.586342703577562
				hsa-miR-212	CCT2	0.550132548173243		hsa-miR-132	NAV1	0.632016546097822
				hsa-miR-378	CCT2	-0.565421137335165		hsa-miR-212	NAV1	0.676200073924653
				hsa-miR-221	CD163	0.552223430701402		hsa-miR-155	NBL1	0.732742045039663
				hsa-miR-29a	CD164	-0.539201667169005		hsa-miR-222	NBL1	0.58478432079046
				hsa-miR-155	CD1A	-0.740206087499694		hsa-miR-132	NCF2	-0.605171408371278
				hsa-miR-222	CD1A	-0.64045072845014		hsa-miR-155	NCF2	-0.668906151088898
				hsa-miR-155	CD1B	-0.578843594848598		hsa-miR-212	NCF2	-0.654209804017484
				hsa-miR-222	CD1B	-0.545717584248495		hsa-miR-155	NCK2	0.646431974800963
				hsa-miR-155	CD1C	-0.675052624303663		hsa-miR-222	NCK2	0.571231941917139
				hsa-miR-1228	CD1E	0.572106807539087		hsa-miR-155	NCKIPSD	-0.600498026208489
				hsa-miR-1234	CD1E	0.55119569671875		hsa-miR-132	NDE1	0.624937041334644
				hsa-miR-1238	CD1E	0.547406637029106		hsa-miR-155	NDE1	0.62509074313895
				hsa-miR-146a	CD1E	-0.583144624159841		hsa-miR-212	NDE1	0.68387581450906
				hsa-miR-155	CD1E	-0.77872541910528		hsa-miR-132	NDUFB6	-0.594861793401691
				hsa-miR-1825	CD1E	0.547250914076121		hsa-miR-155	NDUFB6	-0.563084243410764
				hsa-miR-200c	CD1E	0.577584784141702		hsa-miR-212	NDUFB6	-0.621466336455926
				hsa-miR-222	CD1E	-0.591260416744714		hsa-miR-3663-3p	NDUFB6	0.622267591687987
				hsa-miR-940	CD1E	0.561665265240568		hsa-miR-212	NEK6	0.577840941546766
				hsa-miR-1275	CD200	0.578948071568415		hsa-miR-3663-3p	NEK6	-0.696866828943776
				hsa-miR-155	CD200	0.748594146856446		hsa-miR-3663-3p	NES	-0.590293118314188
				hsa-miR-1228	CD200R1	0.54177137842012		hsa-miR-3663-3p	NETO2	-0.576831295182742
				hsa-miR-1281	CD200R1	0.545272018200611		hsa-miR-155	NFE2L1	0.603685553906649
				hsa-miR-155	CD200R1	-0.728308177014999		hsa-miR-212	NFKB1	0.618064684076286
				hsa-miR-222	CD200R1	-0.559914346295823		hsa-miR-132	NFKB2	0.567441873339058
				hsa-miR-155	CD209	-0.701590670878407		hsa-miR-155	NFKB2	0.611993459737176
				hsa-miR-186	CD209	-0.576260359287083		hsa-miR-212	NFKB2	0.645620092901794
				hsa-miR-505	CD209	-0.608218750574476		hsa-miR-132	NFKBID	0.714827024122125
				hsa-miR-146a	CD226	-0.577073760344273		hsa-miR-155	NFKBID	0.680817078124337
				hsa-miR-155	CD226	-0.777971610351727		hsa-miR-212	NFKBID	0.729522203138862
				hsa-miR-222	CD226	-0.555591286758417		hsa-miR-155	NHEDC2	0.657581193561675
				hsa-miR-150	CD247	0.644061915057078		hsa-miR-222	NHEDC2	0.564903853206452
				hsa-miR-155	CD274	0.607791034252537		hsa-miR-132	NID1	0.622783781597707
				hsa-miR-155	CD276	-0.634614606624492		hsa-miR-212	NID1	0.641308494104075
				hsa-miR-505	CD276	-0.539081493533982		hsa-miR-155	NIPAL2	-0.571635451878522
				hsa-miR-210	CD300A	0.730870820056633		hsa-miR-3663-3p	NMNAT3	0.621095278354923
				hsa-miR-212	CD300C	-0.601003946717056		hsa-miR-155	NNT	-0.581403904468519
				hsa-miR-146a	CD300LF	0.557560777293931		hsa-miR-132	NOP10	-0.619290750129852
				hsa-miR-1307	CD33	-0.615150759532872		hsa-miR-212	NOP10	-0.621872898739263
				hsa-miR-155	CD33	-0.722886261005639		hsa-miR-155	NRGN	-0.596463219849828
				hsa-miR-186	CD33	-0.622834819467373		hsa-miR-155	NRIP3	0.56333700014817
				hsa-miR-212	CD33	-0.567085489654414		hsa-miR-1915	NRIP3	-0.565465630712651
				hsa-miR-27a	CD33	0.593458734502698		hsa-miR-132	NSDHL	0.565148234946761
				hsa-miR-378	CD33	0.584006387465712		hsa-miR-212	NSDHL	0.585437270868907
				hsa-miR-505	CD33	-0.582490735165446		hsa-miR-3663-3p	NSDHL	-0.5813781925857
				hsa-miR-155	CD36	-0.784485749084886		hsa-miR-221	NT5C3	-0.59938678373688
				hsa-miR-222	CD36	-0.617717276990202		hsa-miR-132	NUAK2	0.699936657539657
				hsa-miR-505	CD36	-0.551512814071922		hsa-miR-155	NUAK2	0.640217200951033
				hsa-miR-186	CD38	0.591858511141987		hsa-miR-212	NUAK2	0.673689326719059
				hsa-miR-222	CD38	0.617470027894487		hsa-miR-222	NUAK2	0.60439220614622
				hsa-miR-150	CD3D	0.591891305431042		hsa-miR-155	NUDT16	-0.614478329939431
				hsa-miR-210	CD4	0.548017043967007		hsa-miR-129-3p	NUPL2	-0.600233945642853
				hsa-miR-378	CD4	0.581651298897889		hsa-miR-155	OPTN	0.661077948212362
				hsa-miR-103a	CD40	0.609283030141256		hsa-miR-222	OPTN	0.587069128740479
				hsa-miR-23b	CD40	0.544345836959891		hsa-miR-155	OSTF1	0.611355658186843
				hsa-miR-424	CD40	0.554984528129107		hsa-miR-3663-3p	OXA1L	0.680437672148218
				hsa-miR-155	CD46	0.600767739840599		hsa-miR-132	P2RY10	0.68743271761604
				hsa-miR-186	CD46	0.603680437334508		hsa-miR-155	P2RY10	0.566532330192894
				hsa-miR-155	CD53	-0.703445188847914		hsa-miR-212	P2RY10	0.731613775085335
				hsa-miR-186	CD53	-0.55645791277031		hsa-miR-155	P2RY6	-0.563479565243743
				hsa-miR-155	CD55	0.594492688262691		hsa-miR-132	P2RY8	0.641718226279464
				hsa-miR-155	CD63	-0.573859790262272		hsa-miR-212	P2RY8	0.632111375800205
				hsa-miR-1249	CD68	0.556992950902816		hsa-miR-212	PANK2	-0.567443204668923
				hsa-miR-505	CD68	-0.563621902782632		hsa-miR-193b	PAPOLA	-0.583605007310294
				hsa-miR-1307	CD80	0.596367746843914		hsa-miR-155	PAQR8	-0.576767185672479
				hsa-miR-186	CD80	0.573218468066074		hsa-miR-222	PAQR8	-0.56762375711479
				hsa-miR-221	CD80	-0.578643979393412		hsa-miR-362-5p	PARP10	-0.564322363779347
				hsa-miR-27a	CD80	-0.606790265952882		hsa-miR-155	PARVG	-0.728525438627787
				hsa-miR-421	CD80	-0.548611377243299		hsa-miR-212	PARVG	-0.571552703075795
				hsa-miR-93	CD80	0.579795682361251		hsa-miR-222	PARVG	-0.567538069508783
				hsa-miR-146a	CD82	0.719416367945959		hsa-miR-212	PCMTD2	-0.56884927855456
				hsa-miR-155	CD82	0.632381075361859		hsa-miR-132	PCTP	-0.578130910928908
				hsa-miR-132	CD83	0.608451735448492		hsa-miR-212	PCTP	-0.632246213740721
				hsa-miR-212	CD83	0.73908338152815		hsa-miR-155	PDCD6IP	-0.608102836832245
				hsa-miR-221	CD83	-0.758988332684127		hsa-miR-34a	PDCD6IP	-0.583146581220637
				hsa-miR-27a	CD83	-0.649736046417081		hsa-miR-146a	PDIA4	-0.674278322926348
				hsa-miR-378	CD83	-0.719678983882651		hsa-miR-181b	PDIA4	-0.5904271892414
				hsa-miR-421	CD83	-0.551506633512786		hsa-miR-27b	PDIA4	0.609476656833629
				hsa-miR-505	CD83	0.557734565002885		hsa-miR-34a	PDIA4	-0.567581893747998
				hsa-miR-93	CD83	0.549650686951228		hsa-miR-193b	PDLIM7	-0.616593499376503
				hsa-miR-1307	CD86	0.562784505363428		hsa-miR-155	PECAM1	-0.578403982239091
				hsa-miR-186	CD86	0.599375544239157		hsa-miR-155	PGCP	-0.67892234081699
				hsa-miR-212	CD86	0.647106583118771		hsa-miR-222	PGCP	-0.586961251640579
				hsa-miR-221	CD86	-0.616615930701394		hsa-miR-421	PGCP	0.604707909220968
				hsa-miR-26a	CD86	0.538740228975661		hsa-miR-1307	PHC3	0.578962959836939
				hsa-miR-27a	CD86	-0.640344742046824		hsa-miR-132	PHF16	0.639515678633536
				hsa-miR-378	CD86	-0.610388880893469		hsa-miR-155	PHF16	0.587537202501481
				hsa-miR-155	CD9	-0.586546993675182		hsa-miR-212	PHF16	0.708890381203091
				hsa-miR-27b	CD93	0.581823937872511		hsa-miR-193b	PHLDA1	-0.587354018250202
				hsa-miR-103a	CD97	-0.560867138994214		hsa-miR-181b	PHLPP1	-0.576569295609813
				hsa-miR-155	CDC2L6	-0.56260003142457		hsa-miR-193b	PHTF2	-0.566494168477361
				hsa-miR-146a	CDC37	-0.55948037589611		hsa-miR-132	PHYHD1	-0.563377657382785
				hsa-miR-155	CDC37	-0.735588510671686		hsa-miR-193b	PICALM	-0.572094505682071
				hsa-miR-222	CDC37	-0.592813168896708		hsa-miR-132	PIGH	-0.655230085195904
				hsa-miR-505	CDC37	-0.538915658787962		hsa-miR-212	PIGH	-0.650001830718905
				hsa-miR-29a	CDC40	-0.605427919891142		hsa-miR-132	PIGY	-0.586439273409982
				hsa-miR-212	CDC42EP2	-0.650586765368371		hsa-miR-212	PIGY	-0.588708177457513
				hsa-miR-221	CDC42EP2	0.570420699378625		hsa-miR-155	PIK3CA	0.629535331359582
				hsa-miR-27a	CDC42EP2	0.559598744092356		hsa-miR-29a	PIM1	0.563489379980863
				hsa-miR-378	CDC42EP2	0.629981825236003		hsa-miR-212	PIM3	0.579526820865359
				hsa-miR-186	CDCA5	0.564876297362798		hsa-miR-155	PIPOX	-0.627619145707339
				hsa-miR-155	CDGAP	-0.560899743443143		hsa-miR-132	PITPNC1	0.57034598577489
				hsa-miR-155	CDH1	-0.62303887106396		hsa-miR-212	PITPNC1	0.582148912580876
				hsa-miR-222	CDH1	-0.567674874952801		hsa-miR-193b	PKIB	-0.639371113773809
				hsa-miR-1228	CDH2	0.564134004759739		hsa-miR-155	PLA1A	0.566476199397071
				hsa-miR-146a	CDH2	-0.595874203849171		hsa-miR-212	PLAGL1	0.613294496378882
				hsa-miR-155	CDH2	-0.829895356204535		hsa-miR-155	PLCB2	-0.722717861040622
				hsa-miR-222	CDH2	-0.644837175125139		hsa-miR-132	PLEKHG1	0.578234097476867
				hsa-miR-505	CDH2	-0.579337404846269		hsa-miR-155	PLEKHG1	0.621004592973759
				hsa-miR-1307	CDK5	-0.571044731756691		hsa-miR-222	PLEKHM2	0.564479309462189
				hsa-miR-155	CDK5	-0.619047956744078		hsa-miR-155	PLEKHO2	-0.585257974211674
				hsa-miR-103a	CDK6	0.561889777840018		hsa-miR-222	PLEKHO2	-0.574478353841929
				hsa-miR-155	CDKN2C	0.592943988801885		hsa-miR-132	PLXNA1	0.661446391226485
				hsa-miR-1228	CDR2	0.543975336793002		hsa-miR-1915	PLXNA1	-0.574087773313033
				hsa-miR-1234	CDR2	0.557478981631681		hsa-miR-212	PLXNA1	0.651304935784849
				hsa-miR-1238	CDR2	0.569834200585555		hsa-miR-3663-3p	PLXNA1	-0.592710764147776
				hsa-miR-1280	CDR2	0.542664434221766		hsa-miR-155	PLXNA3	0.635320881802844
				hsa-miR-1281	CDR2	0.559797458265094		hsa-miR-212	PLXNA3	0.568523039716711
				hsa-miR-146a	CDR2	-0.608264920012028		hsa-miR-132	PLXNC1	0.60656176206086
				hsa-miR-155	CDR2	-0.664556486833675		hsa-miR-155	PLXNC1	0.585115420865089
				hsa-miR-222	CDR2	-0.557171379117975		hsa-miR-212	PLXNC1	0.615556841902948
				hsa-miR-766	CDR2	0.584660983613202		hsa-miR-155	PMAIP1	0.686861533328256
				hsa-miR-1228	CDR2L	0.544625158303818		hsa-miR-212	PMAIP1	0.603719471427215
				hsa-miR-155	CDR2L	-0.820562703550352		hsa-miR-222	PMAIP1	0.585821939446733
				hsa-miR-186	CDR2L	-0.58729263251579		hsa-miR-155	PNPO	-0.635635703834522
				hsa-miR-222	CDR2L	-0.688611013719276		hsa-miR-1915	PNPO	0.585288348897963
				hsa-miR-155	CDS1	-0.575112890702934		hsa-miR-212	PNPO	-0.569539812318749
				hsa-miR-766	CDS1	0.542883892584539		hsa-miR-3663-3p	PNPO	0.619224123966778
				hsa-miR-29a	CDYL	0.57026428376479		hsa-miR-155	POLD1	-0.628621525034194
				hsa-miR-1275	CDYL2	0.574483157212179		hsa-miR-155	POLE4	-0.566740221977557
				hsa-miR-155	CDYL2	0.700323354384736		hsa-miR-34a	POLE4	-0.569389467369284
				hsa-miR-505	CDYL2	0.548063811347735		hsa-miR-155	POLR1E	-0.575203189200082
				hsa-miR-1275	CEBPA	-0.564890812709166		hsa-miR-155	POU2F1	0.603553429834583
				hsa-miR-155	CEBPA	-0.78018561646335		hsa-miR-1915	POU2F1	-0.58550691002966
				hsa-miR-186	CEBPA	-0.604403124452998		hsa-miR-212	POU2F1	0.606717069233869
				hsa-miR-222	CEBPA	-0.555139852852945		hsa-miR-3663-3p	POU2F1	-0.63707938108155
				hsa-miR-505	CEBPA	-0.570229858004108		hsa-miR-4271	POU2F1	-0.580683518443044
				hsa-miR-7	CEBPA	-0.539851641448483		hsa-miR-155	PPAP2A	-0.57284292478722
				hsa-miR-155	CEBPB	0.588873386715391		hsa-miR-155	PPAP2B	-0.667914384292702
				hsa-miR-212	CEBPG	0.557097979446184		hsa-miR-212	PPAP2B	-0.606847571235904
				hsa-miR-221	CEBPG	-0.570239229515964		hsa-miR-212	PPARG	0.590658779197174
				hsa-miR-1280	CECR5	0.55271574303354		hsa-miR-3663-3p	PPARG	-0.585560917576096
				hsa-miR-155	CECR5	-0.568705794390045		hsa-miR-132	PPBP	0.625485993580316
				hsa-miR-155	CENPBD1	-0.559499930576493		hsa-miR-212	PPBP	0.606395463109541
				hsa-miR-222	CENPJ	0.555540919538024		hsa-miR-132	PPIC	-0.626325434974267
				hsa-miR-652	CENPJ	0.541355137569946		hsa-miR-155	PPIC	-0.618403535755549
				hsa-miR-155	CEP120	0.585849273243982		hsa-miR-212	PPIC	-0.662207492349405
				hsa-miR-155	CEP135	0.61388447413751		hsa-miR-155	PPM1M	-0.567206564121195
				hsa-miR-505	CEP135	0.59439834152007		hsa-miR-212	PPP1R11	-0.578530857959791
				hsa-miR-1228	CEP68	-0.568653960448427		hsa-miR-132	PPP1R14A	0.574442745084284
				hsa-miR-1234	CEP68	-0.602122349086982		hsa-miR-155	PPP1R14A	0.563281547705997
				hsa-miR-1238	CEP68	-0.616896509960562		hsa-miR-212	PPP1R14A	0.60919360065787
				hsa-miR-155	CEP68	0.57451961344552		hsa-miR-155	PPP1R15B	0.570436599044828
				hsa-miR-29a	CEP68	0.633079801030715		hsa-miR-155	PPP1R16A	-0.568445629309623
				hsa-miR-4310	CEP68	-0.546793934087339		hsa-miR-421	PPP2CA	-0.565789334233912
				hsa-miR-940	CEP68	-0.550637930229803		hsa-miR-132	PPP2R5A	-0.574583829175991
				hsa-miR-155	CEPT1	-0.576994381972316		hsa-miR-155	PPTC7	0.660519257091871
				hsa-miR-210	CERCAM	0.552313924656302		hsa-miR-155	PQLC1	-0.638595049299679
				hsa-miR-1307	CERK	-0.549814135052525		hsa-miR-362-5p	PRDM4	-0.58465622285209
				hsa-miR-155	CERK	-0.733231049616264		hsa-miR-132	PRDM8	0.657653345954656
				hsa-miR-186	CERK	-0.613725382188024		hsa-miR-155	PRDM8	0.571825646406137
				hsa-miR-222	CERK	-0.594622344155827		hsa-miR-212	PRDM8	0.655469723848531
				hsa-miR-7	CERK	-0.547626768393693		hsa-miR-155	PRDX2	-0.569414967861621
				hsa-miR-155	CETP	-0.656521065084867		hsa-miR-222	PRDX2	-0.613251831615966
				hsa-miR-1280	CFB	-0.541772045853207		hsa-miR-3663-3p	PRDX2	0.562905578842376
				hsa-miR-155	CFB	0.777191260505289		hsa-miR-132	PRIM1	-0.582020791374506
				hsa-miR-186	CFB	0.560368328314101		hsa-miR-212	PRIM1	-0.590893941180734
				hsa-miR-222	CFB	0.726160189444635		hsa-miR-1915	PRKCA	-0.569678041114347
				hsa-miR-212	CFI	-0.563673694053055		hsa-miR-3663-3p	PRKCA	-0.618387002992215
				hsa-miR-378	CFI	0.543379968324561		hsa-miR-4281	PRKCA	-0.617027094202571
				hsa-miR-221	CFLAR	-0.643317467909694		hsa-miR-762	PRKCA	-0.595302336179324
				hsa-miR-155	CGN	0.587635544285584		hsa-miR-155	PRKCDBP	0.626607735128087
				hsa-miR-505	CGN	0.55043560702191		hsa-miR-421	PRKD3	0.580527959956736
				hsa-miR-155	CHCHD10	-0.578619767029847		hsa-miR-155	PRKX	-0.59539998864503
				hsa-miR-186	CHCHD10	-0.635228329823786		hsa-miR-212	PRKX	-0.562834109467704
				hsa-miR-26a	CHCHD10	-0.602948679625918		hsa-miR-132	PRMT1	0.705607164990453
				hsa-miR-155	CHCHD7	-0.677177596630725		hsa-miR-212	PRMT1	0.684176095909448
				hsa-miR-27a	CHCHD7	0.539297760352806		hsa-miR-1915	PRMT6	0.606998484965476
				hsa-miR-378	CHCHD7	0.573978511662082		hsa-miR-132	PROS1	-0.577009049439834
				hsa-miR-505	CHCHD7	-0.568059338442009		hsa-miR-155	PROS1	-0.615704683275279
				hsa-miR-155	CHD9	-0.641120769010992		hsa-miR-212	PROS1	-0.566966837942347
				hsa-miR-1307	CHEK2	-0.567053289181225		hsa-miR-155	PRPF40A	0.644412448709761
				hsa-miR-330-3p	CHEK2	-0.570945430163297		hsa-miR-155	PRRT3	0.572967130355125
				hsa-miR-766	CHKA	0.541700796653672		hsa-miR-155	PSEN2	0.667185424946084
				hsa-miR-155	CHKB	0.623267700277174		hsa-miR-186	PSMA4	0.586445168424482
				hsa-miR-200c	CHKB	-0.545686160866089		hsa-miR-155	PSMC3	0.625367743570978
				hsa-miR-155	CHMP4A	0.547576904701772		hsa-miR-155	PSMC5	0.56797548763465
				hsa-miR-155	CHMP4B	0.549434342690334		hsa-miR-212	PSMC5	0.593615212858351
				hsa-miR-27a	CHMP4C	0.590773993290011		hsa-miR-132	PSMD2	0.575836665165366
				hsa-miR-186	CHMP5	0.550638268131035		hsa-miR-132	PSME4	0.609232304929972
				hsa-miR-155	CHMP6	0.706145829751626		hsa-miR-212	PSME4	0.620518644286632
				hsa-miR-222	CHMP6	0.600204338639908		hsa-miR-132	PTAFR	-0.586083043917299
				hsa-miR-155	CHN2	-0.554188796774158		hsa-miR-212	PTAFR	-0.604777984474309
				hsa-miR-155	CHPF	-0.569478184032195		hsa-miR-132	PTGER4	0.688472466651055
				hsa-miR-1271	CHRNA1	0.591487805789778		hsa-miR-155	PTGER4	0.639568302670245
				hsa-let-7c	CHST10	0.596361200210095		hsa-miR-212	PTGER4	0.713427194019719
				hsa-miR-103a	CHST10	0.691164307406988		hsa-miR-132	PTGIR	0.567767792606799
				hsa-miR-125b	CHST10	0.578323290189857		hsa-miR-155	PTGIR	0.678951081611526
				hsa-miR-23b	CHST10	0.540004367609099		hsa-miR-212	PTGIR	0.64872002514854
				hsa-miR-330-3p	CHST10	0.630005781103874		hsa-miR-155	PTGS1	-0.655789918029578
				hsa-miR-93	CHST10	0.589947843076328		hsa-miR-155	PTPN12	-0.578064335642828
				hsa-miR-1228	CHST15	-0.553923208736724		hsa-miR-222	PTPN23	0.571151905652639
				hsa-miR-1234	CHST15	-0.599374181677939		hsa-miR-148b	PTPN6	0.566667697769045
				hsa-miR-1238	CHST15	-0.568661313869633		hsa-miR-155	PTPN6	-0.659895696783273
				hsa-miR-29a	CHST15	0.563260216257709		hsa-miR-212	PTPN6	-0.578696617520288
				hsa-miR-940	CHST15	-0.56443662530891		hsa-miR-155	PTPRE	-0.714455194397534
				hsa-miR-155	CHST7	0.65659850883333		hsa-miR-212	PTPRE	-0.565888757457341
				hsa-miR-212	CHST7	0.615305732632174		hsa-miR-222	PTPRE	-0.617803556996099
				hsa-miR-378	CHST7	-0.582691825171913		hsa-miR-212	PTPRF	0.635833677260219
				hsa-miR-505	CHST7	0.542252465190321		hsa-miR-132	PTPRK	0.61167298090747
				hsa-miR-155	CHSY1	-0.620925734694075		hsa-miR-155	PTPRK	0.593306850743972
				hsa-miR-155	CIAO1	-0.565370374689539		hsa-miR-212	PTPRK	0.569089896607585
				hsa-miR-221	CIDEA	0.60571275880085		hsa-miR-4271	PUF60	-0.576942981579265
				hsa-miR-378	CIDEA	0.593117708699736		hsa-miR-155	PVR	0.577444275923664
				hsa-miR-155	CIITA	-0.768917313194577		hsa-miR-155	PWP1	0.576667820619237
				hsa-miR-222	CIITA	-0.546620225269809		hsa-miR-155	PYCARD	-0.565232881689991
				hsa-miR-155	CISD1	-0.769733368214394		hsa-miR-132	RAB13	-0.593274933635582
				hsa-miR-186	CISD1	-0.662117254868363		hsa-miR-181b	RAB15	-0.600252252472092
				hsa-miR-222	CISD1	-0.605767985867192		hsa-miR-155	RAB23	0.599336205861241
				hsa-miR-505	CISD1	-0.542381888849378		hsa-miR-155	RAB24	-0.638016043629841
				hsa-miR-212	CITED2	-0.561990044629734		hsa-miR-155	RAB32	-0.57800262096317
				hsa-miR-193b	CKAP2	-0.539134237586934		hsa-miR-212	RAB32	-0.592974459582347
				hsa-miR-378	CKAP2	0.555027981820951		hsa-miR-222	RAB32	-0.602574504006608
				hsa-miR-155	CKB	0.745548987159911		hsa-miR-155	RAB8B	0.756772670016916
				hsa-miR-193b	CKB	0.539084368922289		hsa-miR-155	RAB9A	0.631666661779572
				hsa-miR-26a	CKB	0.546238930625872		hsa-miR-212	RABGGTB	0.627252343400553
				hsa-miR-505	CKB	0.567154677515824		hsa-miR-155	RAC2	-0.664351882621148
				hsa-miR-155	CKLF	-0.778780224032145		hsa-miR-222	RAC2	-0.583682126149582
				hsa-miR-222	CKLF	-0.577124844925447		hsa-miR-1915	RALGAPA2	0.57294279768767
				hsa-miR-222	CKS1B	0.553012751110098		hsa-miR-132	RANGAP1	0.637012203162575
				hsa-miR-7	CKS1B	0.631884811071706		hsa-miR-212	RANGAP1	0.627547655678928
				hsa-miR-130a	CLC	0.546119261958932		hsa-miR-155	RAP1GAP	-0.615931329713243
				hsa-miR-1280	CLCF1	-0.554205152834786		hsa-miR-222	RAP1GAP	-0.580407069823169
				hsa-miR-155	CLCF1	0.764830035870181		hsa-miR-132	RAPH1	0.591696458706951
				hsa-let-7c	CLCN6	0.560585381087623		hsa-miR-212	RAPH1	0.6387156890071
				hsa-miR-29a	CLCN6	0.561764246541544		hsa-miR-4271	RAPH1	-0.566254888905051
				hsa-miR-146a	CLDN1	-0.555378484271885		hsa-miR-27b	RASAL1	0.644931709506941
				hsa-miR-155	CLDN1	-0.769369028861674		hsa-miR-132	RASGRP2	0.615719801517179
				hsa-miR-222	CLDN1	-0.656137958852602		hsa-miR-155	RASGRP2	0.637500676573677
				hsa-miR-155	CLDN12	0.54054259846173		hsa-miR-212	RASGRP2	0.652413183028289
				hsa-miR-1307	CLEC10A	-0.575381558595519		hsa-miR-155	RASSF7	-0.579281063589589
				hsa-miR-155	CLEC10A	-0.750236858016021		hsa-miR-132	RBMS2	-0.565375826840706
				hsa-miR-186	CLEC10A	-0.623707814207135		hsa-miR-155	RBMS2	-0.605909978138182
				hsa-miR-222	CLEC10A	-0.587051320539817		hsa-miR-212	RBMS2	-0.6425307531039
				hsa-miR-27a	CLEC10A	0.540194087595616		hsa-miR-155	RCBTB2	-0.56857485886133
				hsa-miR-378	CLEC10A	0.547141927727308		hsa-miR-212	RCBTB2	-0.607143657682464
				hsa-miR-155	CLEC1A	-0.774608654660224		hsa-miR-3663-3p	RCN2	0.630940117027648
				hsa-miR-222	CLEC1A	-0.631923405207965		hsa-miR-762	RCN2	0.606875996435121
				hsa-miR-155	CLEC4A	-0.791086313292548		hsa-miR-155	RCSD1	0.570482455202922
				hsa-miR-222	CLEC4A	-0.603293358604094		hsa-miR-132	REL	0.722337140848804
				hsa-miR-146a	CLEC4F	-0.541127536429004		hsa-miR-155	REL	0.692415263971016
				hsa-miR-1228	CLEC7A	0.545695288164645		hsa-miR-212	REL	0.788397982625846
				hsa-miR-155	CLEC7A	-0.817249347194046		hsa-miR-155	RELB	0.572794440867969
				hsa-miR-505	CLEC7A	-0.594462150181107		hsa-miR-212	RELB	0.614105227581274
				hsa-miR-29a	CLIC1	-0.545748924925251		hsa-miR-212	REPIN1	0.592685053494488
				hsa-miR-155	CLIC3	-0.667530877407951		hsa-miR-132	RERE	-0.567127277519528
				hsa-miR-1307	CLN8	-0.567116510662508		hsa-miR-155	RERE	-0.665258673185766
				hsa-miR-155	CLN8	-0.581011649443811		hsa-miR-212	RERE	-0.598210710470279
				hsa-miR-186	CLN8	-0.693116115275972		hsa-miR-362-5p	REST	-0.604145041764457
				hsa-miR-7	CLN8	-0.540516573512891		hsa-miR-132	REXO1	0.599504742424255
				hsa-miR-155	CLNS1A	0.67221194545469		hsa-miR-212	REXO1	0.565786894944321
				hsa-miR-222	CLNS1A	0.540686461733326		hsa-miR-222	REXO1	0.59522996783469
				hsa-miR-155	CLPP	0.5863493656541		hsa-miR-3663-3p	REXO1	-0.577074978666814
				hsa-miR-1234	CLTA	0.553633377750892		hsa-miR-4271	REXO1	-0.604380461547805
				hsa-miR-940	CLTA	0.542025485357832		hsa-miR-129-3p	RFXAP	-0.574583832143662
				hsa-miR-155	CLTB	-0.76757744143717		hsa-miR-212	RGL1	-0.593633789817806
				hsa-miR-186	CLTB	-0.627578588022452		hsa-miR-155	RGL2	-0.678010185429402
				hsa-miR-222	CLTB	-0.633307545793253		hsa-miR-132	RGS1	0.569760934536883
				hsa-miR-505	CLTB	-0.586088025964185		hsa-miR-155	RGS1	0.652028655631579
				hsa-miR-186	CLUAP1	0.540421417524283		hsa-miR-212	RGS1	0.658083152580857
				hsa-miR-212	CLYBL	-0.564043643956838		hsa-miR-155	RGS10	-0.580095677833642
				hsa-miR-378	CLYBL	0.594124348464678		hsa-miR-155	RMI1	-0.566761564719877
				hsa-miR-155	CMIP	-0.712438378772296		hsa-miR-212	RMI1	-0.591308749064378
				hsa-miR-222	CMIP	-0.651814239048487		hsa-miR-132	RNASET2	-0.65363175456995
				hsa-miR-155	CMTM3	-0.623320243770645		hsa-miR-155	RNASET2	-0.633386097984222
				hsa-miR-155	CMTM4	-0.630857017855279		hsa-miR-212	RNASET2	-0.687223055071322
				hsa-miR-146a	CMTM7	-0.5444791469305		hsa-miR-27b	RNF11	-0.571958669776943
				hsa-miR-155	CMTM7	-0.736977807854057		hsa-miR-155	RNF130	-0.605972084563883
				hsa-miR-222	CMTM7	-0.621547855785259		hsa-miR-155	RNF166	-0.576654581119105
				hsa-miR-1228	CMTM8	0.570798083731175		hsa-miR-212	RNF24	-0.581708740153963
				hsa-miR-155	CMTM8	-0.855709898061899		hsa-miR-132	ROBO1	0.579386274533069
				hsa-miR-185	CMTM8	0.560895690558129		hsa-miR-1915	ROBO3	0.585989641340179
				hsa-miR-186	CMTM8	-0.577119392948218		hsa-miR-3665	ROBO3	0.579510702750742
				hsa-miR-222	CMTM8	-0.6934191224444		hsa-miR-3663-3p	RPAP1	-0.569333050007527
				hsa-miR-361-5p	CMTM8	0.563868234165584		hsa-miR-212	RPL14	0.564379520790681
				hsa-miR-505	CMTM8	-0.583665376513551		hsa-miR-188-5p	RPL18A	-0.586472934259249
				hsa-miR-7	CMTM8	-0.550897895265674		hsa-miR-155	RPL26	-0.562892544174165
				hsa-miR-155	CNIH3	-0.567699692829547		hsa-miR-155	RPL39L	-0.612364121313898
				hsa-miR-29a	CNNM4	0.540383835453318		hsa-miR-212	RPS17	0.589460578557559
				hsa-miR-193b	CNOT10	0.545668759929326		hsa-miR-362-5p	RPS18	0.634742095440119
				hsa-miR-330-3p	CNOT10	0.563830193239639		hsa-miR-132	RPUSD3	-0.615482363355469
				hsa-miR-874	CNOT10	0.53918562366714		hsa-miR-155	RPUSD3	-0.575389642422605
				hsa-miR-93	CNOT10	0.579943835660875		hsa-miR-212	RPUSD3	-0.607155341738739
				hsa-miR-330-3p	CNTNAP1	0.555576982717124		hsa-miR-362-5p	RRAGB	0.576802271122974
				hsa-miR-142-3p	COG5	0.582139418110547		hsa-miR-155	RRAGC	0.5857026998142
				hsa-miR-155	COL24A1	-0.60631007351114		hsa-miR-421	RRAGC	-0.578146724636489
				hsa-miR-1234	COL5A3	-0.560030865710966		hsa-miR-132	RRAGD	0.668473136690421
				hsa-miR-155	COL5A3	0.583116441999704		hsa-miR-155	RRAGD	0.590026432150326
				hsa-miR-1275	COMMD1	0.557224286357284		hsa-miR-212	RRAGD	0.711871685605516
				hsa-miR-155	COMMD1	0.676757663565495		hsa-miR-1915	RRM2B	0.562824569218466
				hsa-miR-505	COMMD1	0.627406520530372		hsa-miR-3663-3p	RRM2B	0.586319636492724
				hsa-miR-7	COMMD1	0.5431094390259		hsa-miR-132	RRP1B	-0.576696243570162
				hsa-miR-155	COMMD10	-0.664819826414117		hsa-miR-155	RRP1B	-0.691564650097277
				hsa-miR-222	COMMD5	-0.540930075054469		hsa-miR-212	RRP1B	-0.581006237873213
				hsa-miR-155	COPA	-0.710927573437314		hsa-miR-222	RRP1B	-0.599258323821734
				hsa-miR-1280	COPS7B	0.586954311452622		hsa-miR-1915	RRP7A	-0.652251651456028
				hsa-let-7c	COQ3	-0.539333901582047		hsa-miR-3663-3p	RRP7A	-0.619841403196536
				hsa-miR-186	COQ6	-0.546763051560422		hsa-miR-3665	RRP7A	-0.623489810457868
				hsa-miR-1228	CORO1A	0.542646201072263		hsa-miR-155	RRS1	-0.565676333523857
				hsa-miR-1280	CORO1A	0.577208828344349		hsa-miR-4271	RSPH3	0.598685340488001
				hsa-miR-155	CORO1A	-0.771708071308248		hsa-miR-155	RSU1	-0.657920124947909
				hsa-miR-222	CORO1A	-0.551552498107574		hsa-miR-212	RTP4	-0.576030637827681
				hsa-miR-155	CORO1C	-0.617413651474184		hsa-miR-132	RWDD1	-0.595278668835303
				hsa-miR-1246	CORO7	-0.56547272203983		hsa-miR-212	RWDD1	-0.6161715857488
				hsa-miR-1290	CORO7	-0.552525135154105		hsa-miR-1915	RWDD2A	0.568518102977224
				hsa-miR-378	COX17	-0.618764750266139		hsa-miR-3663-3p	RWDD2A	0.637273576929618
				hsa-miR-212	COX5B	-0.592860501533012		hsa-miR-181b	RXRA	-0.578944924073618
				hsa-miR-186	COX7B	-0.564938114676557		hsa-miR-155	RYBP	0.647738811024965
				hsa-miR-186	COX7C	-0.607902969415305		hsa-miR-132	S100A4	-0.647669404217368
				hsa-miR-212	CP110	-0.556504348160159		hsa-miR-155	S100A4	-0.669743016242169
				hsa-miR-378	CP110	0.589589932253888		hsa-miR-212	S100A4	-0.761236849230302
				hsa-miR-130a	CPA3	0.564991105970048		hsa-miR-155	S100A6	-0.577374669274455
				hsa-miR-155	CPEB1	0.629026320947944		hsa-miR-212	S100A6	-0.609176973237817
				hsa-miR-155	CPEB3	0.575580160933353		hsa-miR-155	S1PR1	0.623917766715407
				hsa-miR-1275	CPNE3	-0.566719341250568		hsa-miR-222	S1PR1	0.575838023517984
				hsa-miR-155	CPNE3	-0.629075742815821		hsa-miR-132	SAP30	-0.565128112904431
				hsa-miR-503	CPSF3	-0.605021399736087		hsa-miR-212	SAP30	-0.581687716718356
				hsa-miR-1228	CPSF3L	-0.574119147373368		hsa-miR-132	SASH1	-0.567466407120411
				hsa-miR-129-3p	CPSF3L	0.546612999532246		hsa-miR-212	SASH1	-0.571577650528964
				hsa-miR-155	CPSF3L	0.621106020457859		hsa-miR-155	SASH3	-0.589706924289102
				hsa-miR-940	CPSF3L	-0.587259261272337		hsa-miR-212	SASH3	-0.565258940107087
				hsa-miR-107	CPT2	-0.560721755520438		hsa-miR-132	SAT1	0.566121211050444
				hsa-miR-155	CPVL	-0.59440976207178		hsa-miR-155	SAT1	0.590164717236223
				hsa-miR-212	CPVL	-0.553314211913887		hsa-miR-212	SAT1	0.631569099484281
				hsa-miR-378	CPVL	0.673292849633283		hsa-miR-155	SATB2	-0.58785165735605
				hsa-miR-185	CRAT	0.561082290863803		hsa-miR-212	SCMH1	-0.595751778756499
				hsa-miR-186	CRAT	-0.543762549838867		hsa-miR-212	SCN9A	-0.585730205298286
				hsa-miR-155	CREB5	-0.548985392638297		hsa-miR-221	SCO1	-0.645737017967209
				hsa-miR-155	CREG1	0.55182190992853		hsa-miR-27b	SDC2	0.570622966790569
				hsa-miR-155	CRELD2	-0.647994164434942		hsa-miR-212	SDCBP	-0.563852857376121
				hsa-miR-222	CRELD2	-0.562901592705659		hsa-miR-132	SDPR	-0.569771141750393
				hsa-miR-155	CRHR1	-0.550690262871677		hsa-miR-155	SDPR	-0.675929282006469
				hsa-miR-155	CRIPT	0.613563325529955		hsa-miR-212	SDPR	-0.565324644925915
				hsa-miR-221	CRK	-0.627518691474041		hsa-miR-181b	SDSL	0.567731935862166
				hsa-miR-155	CRLF2	0.739905114417483		hsa-miR-193b	SDSL	0.571515042460286
				hsa-miR-29a	CRLF2	0.548909120463625		hsa-miR-155	SEBOX	0.590986123872191
				hsa-miR-155	CRLF3	0.740095531633759		hsa-miR-212	SEC61B	0.581380866013273
				hsa-miR-222	CRLF3	0.616200232422979		hsa-miR-132	SEL1L3	0.587397968270001
				hsa-miR-7	CRLF3	0.567427896950044		hsa-miR-212	SEL1L3	0.633957681430685
				hsa-miR-155	CRLS1	-0.703428298999956		hsa-miR-148b	SEPN1	0.582214031509021
				hsa-miR-186	CRLS1	-0.586070897344979		hsa-miR-155	SEPN1	-0.568433447941092
				hsa-miR-186	CRYL1	-0.565992506093202		hsa-miR-155	SEPW1	0.596721051572975
				hsa-miR-212	CRYL1	-0.565065131451876		hsa-miR-27b	SERPINH1	0.567261709605268
				hsa-miR-27a	CRYL1	0.616736288515204		hsa-miR-132	SERTAD2	0.577516141477024
				hsa-miR-378	CRYL1	0.555875450548596		hsa-miR-212	SERTAD2	0.569678571136396
				hsa-miR-505	CRYL1	-0.543838620351953		hsa-miR-155	SERTAD4	-0.563853865302409
				hsa-miR-1280	CS	0.557939831803334		hsa-miR-199b-5p	SERTAD4	0.578326208449228
				hsa-miR-155	CS	-0.688084735336038		hsa-miR-212	SESTD1	-0.566218136361199
				hsa-miR-1228	CSDA	-0.578600598265374		hsa-let-7e	SETD3	-0.60143821121396
				hsa-miR-1238	CSDA	-0.550737341087966		hsa-miR-155	SFRP4	0.612583151314577
				hsa-miR-155	CSDA	0.650767591699755		hsa-miR-222	SFRP4	0.610129413845145
				hsa-miR-29a	CSDA	0.539758330442451		hsa-miR-155	SH3BGRL	-0.647074113410612
				hsa-miR-940	CSDA	-0.555719499549333		hsa-miR-212	SH3BGRL	-0.583240423057541
				hsa-miR-155	CSF1R	-0.766710547519189		hsa-miR-212	SH3BGRL3	-0.616928248857877
				hsa-miR-186	CSF1R	-0.550746810637748		hsa-miR-27b	SH3PXD2B	0.583929884248095
				hsa-miR-222	CSF1R	-0.583093355542133		hsa-miR-132	SHISA5	-0.648606252719835
				hsa-miR-1238	CSF2	-0.551537147033089		hsa-miR-212	SHISA5	-0.67882993954484
				hsa-miR-1280	CSF2	-0.552599493133349		hsa-miR-27b	SHMT2	0.613138070387517
				hsa-miR-155	CSF2	0.593009805930084		hsa-miR-132	SIGLEC10	-0.563044623374951
				hsa-miR-1228	CSK	0.602783304276326		hsa-miR-155	SIGLEC10	-0.731727347719908
				hsa-miR-1234	CSK	0.551546848983484		hsa-miR-212	SIGLEC10	-0.6388287227748
				hsa-miR-1238	CSK	0.581051515752902		hsa-miR-222	SIGLEC10	-0.642984059702577
				hsa-miR-1280	CSK	0.539935449628367		hsa-miR-155	SIGLEC7	-0.602461985678263
				hsa-miR-1281	CSK	0.547886122637029		hsa-miR-132	SIK1	0.562683876708663
				hsa-miR-155	CSK	-0.620831148186112		hsa-miR-155	SIK1	0.579523258122957
				hsa-miR-940	CSK	0.571076491648174		hsa-miR-148b	SIL1	-0.563084879286772
				hsa-miR-155	CSNK2B	-0.719906395459186		hsa-miR-155	SIL1	0.681531118014051
				hsa-miR-222	CSNK2B	-0.57660773561724		hsa-miR-212	SIL1	0.610506998150918
				hsa-let-7c	CSRP1	0.55882996582763		hsa-miR-421	SIPA1L2	-0.571683812462166
				hsa-miR-103a	CSRP1	0.545244400541111		hsa-miR-222	SIRT2	-0.589650069316974
				hsa-miR-125b	CST7	0.582729517716098		hsa-miR-155	SKAP2	-0.703785714250847
				hsa-miR-155	CTBS	0.580214459210751		hsa-miR-212	SKAP2	-0.571900147789499
				hsa-miR-155	CTDSP1	-0.649619889378113		hsa-miR-222	SKAP2	-0.59533750116378
				hsa-miR-186	CTDSPL	-0.633065612486009		hsa-miR-155	SLAMF7	0.600204283047544
				hsa-miR-27a	CTDSPL	0.543195548776952		hsa-miR-155	SLAMF8	-0.606586486134838
				hsa-miR-125b	CTLA4	0.550483537680722		hsa-miR-3663-3p	SLC15A4	-0.575180631177044
				hsa-miR-212	CTNNA1	0.580707620359113		hsa-miR-374c	SLC16A9	-0.582572386543231
				hsa-miR-27a	CTNNA1	-0.595668880064149		hsa-miR-574-5p	SLC1A2	-0.577281678632011
				hsa-miR-378	CTNNA1	-0.594635681968542		hsa-miR-155	SLC1A5	-0.576929468380973
				hsa-miR-155	CTNNAL1	-0.542992307680275		hsa-miR-132	SLC22A23	0.613745247320645
				hsa-miR-1307	CTNNBIP1	-0.571275576492336		hsa-miR-212	SLC22A23	0.611236436693125
				hsa-miR-155	CTNNBIP1	-0.597940758010997		hsa-miR-155	SLC22A5	-0.607464687427808
				hsa-miR-186	CTNNBIP1	-0.642804121689759		hsa-miR-212	SLC24A1	-0.564030787534239
				hsa-miR-27a	CTNNBIP1	0.623814358131167		hsa-miR-3663-3p	SLC24A6	0.625776833761796
				hsa-miR-361-5p	CTNNBIP1	0.558571781084403		hsa-miR-132	SLC25A14	-0.631451703070455
				hsa-miR-378	CTNNBIP1	0.550317170199142		hsa-miR-155	SLC25A14	-0.589972379486643
				hsa-miR-7	CTNNBIP1	-0.64213778977375		hsa-miR-212	SLC25A14	-0.616747069777604
				hsa-miR-34a	CTSA	0.578566971878092		hsa-miR-155	SLC25A40	-0.569406767128896
				hsa-miR-378	CTSC	0.544676984555405		hsa-miR-155	SLC25A5	-0.636921564958294
				hsa-miR-365	CTSO	0.569385779604569		hsa-miR-155	SLC27A3	-0.738753541448045
				hsa-miR-200c	CTTN	0.547805321400981		hsa-miR-212	SLC27A3	-0.629960720448048
				hsa-miR-766	CTTN	0.570148648985454		hsa-miR-222	SLC27A3	-0.659511067952216
				hsa-miR-1275	CTTNBP2	-0.559440807836226		hsa-miR-421	SLC27A3	0.590071333621332
				hsa-miR-155	CTTNBP2	-0.59668977062261		hsa-miR-212	SLC2A1	0.631969450491927
				hsa-miR-186	CTTNBP2	-0.552812816916374		hsa-miR-210	SLC2A3	0.563254857308294
				hsa-miR-505	CTTNBP2	-0.589894962142246		hsa-miR-132	SLC36A4	0.574217126372293
				hsa-miR-1228	CUEDC1	0.580445524527046		hsa-miR-212	SLC36A4	0.602118536219427
				hsa-miR-1234	CUEDC1	0.551619911040151		hsa-miR-132	SLC38A1	0.662230828966174
				hsa-miR-1238	CUEDC1	0.569039606529819		hsa-miR-212	SLC38A1	0.677010603853647
				hsa-miR-1281	CUEDC1	0.568889587519932		hsa-miR-132	SLC38A2	0.598187251556332
				hsa-miR-155	CUEDC1	-0.692890941389495		hsa-miR-212	SLC38A2	0.605841264508297
				hsa-miR-1825	CUEDC1	0.549643493762534		hsa-miR-212	SLC39A11	-0.604314359189605
				hsa-miR-4310	CUEDC1	0.549095966839433		hsa-miR-3663-3p	SLC41A2	-0.578887316639766
				hsa-miR-146a	CUEDC2	0.596587441538676		hsa-miR-155	SLC46A3	-0.713350696291476
				hsa-miR-155	CUGBP2	0.559954764806391		hsa-miR-222	SLC46A3	-0.594305645993572
				hsa-miR-378	CUGBP2	-0.630286433778907		hsa-miR-132	SLC5A3	0.65890549099352
				hsa-miR-505	CUGBP2	0.583182203515414		hsa-miR-155	SLC5A3	0.603485203559713
				hsa-miR-155	CUL1	0.670198946195612		hsa-miR-212	SLC5A3	0.660672808799036
				hsa-miR-186	CUL1	0.686374848375502		hsa-miR-132	SLC5A6	0.573518993651393
				hsa-miR-222	CUL1	0.62856320451224		hsa-miR-212	SLC5A6	0.628997722765495
				hsa-miR-652	CUL1	0.546295101655433		hsa-miR-155	SLC6A6	0.567392493104588
				hsa-miR-7	CUL1	0.548171355619875		hsa-miR-3663-3p	SLC7A1	-0.635450633205197
				hsa-miR-146a	CUL4A	-0.557799639897407		hsa-miR-4271	SLC7A1	-0.592886009525645
				hsa-miR-1275	CUTA	-0.565887987736976		hsa-miR-762	SLC7A1	-0.602197389546289
				hsa-miR-155	CUTA	-0.584642558880563		hsa-miR-155	SLC7A2	0.637067969358521
				hsa-miR-186	CUTA	-0.568965589915122		hsa-miR-222	SLC7A2	0.62085302413624
				hsa-miR-222	CXCL10	0.564776125545904		hsa-miR-155	SLC7A8	-0.567874170284922
				hsa-miR-1275	CXCL13	-0.552181637161107		hsa-miR-155	SLCO2B1	-0.577849798854421
				hsa-let-7c	CXCL16	0.557623124996565		hsa-miR-132	SLCO5A1	0.636633247653248
				hsa-miR-155	CXCL2	0.585265177532896		hsa-miR-155	SLCO5A1	0.578574809272578
				hsa-miR-29a	CXCR4	0.580675097968522		hsa-miR-212	SLCO5A1	0.654170353268357
				hsa-miR-155	CXCR5	0.563381638134796		hsa-miR-132	SLFN11	-0.645880936866484
				hsa-miR-155	CXCR7	0.68102478392069		hsa-miR-155	SLFN11	-0.571904118059271
				hsa-miR-155	CYB561D1	-0.545076313987498		hsa-miR-212	SLFN11	-0.620638023156313
				hsa-miR-1275	CYB5A	0.581747888407517		hsa-miR-148b	SMAD5	0.587549861663147
				hsa-miR-155	CYB5A	0.666692101416088		hsa-miR-155	SMAP2	0.704227160653693
				hsa-miR-505	CYB5A	0.620465697564098		hsa-miR-212	SMAP2	0.567013188812832
				hsa-miR-155	CYB5R1	-0.663980269412841		hsa-miR-155	SMARCD2	-0.583645376756727
				hsa-miR-186	CYB5R1	-0.602930302747961		hsa-miR-34a	SMG7	-0.617269036991718
				hsa-miR-222	CYB5R1	-0.58961892181573		hsa-miR-155	SMS	0.623584299862974
				hsa-miR-361-5p	CYB5R1	0.552325140285086		hsa-miR-155	SNAI3	-0.576125466802364
				hsa-miR-505	CYB5R1	-0.549874222979057		hsa-miR-1915	SNCA	-0.658171148732507
				hsa-miR-1228	CYB5R2	-0.584950034349908		hsa-miR-3663-3p	SNCA	-0.606658789225405
				hsa-miR-1238	CYB5R2	-0.583115029094118		hsa-miR-762	SNCA	-0.569441395450551
				hsa-miR-186	CYHR1	-0.564165561512714		hsa-miR-155	SNX1	-0.583580831102707
				hsa-miR-940	CYP1B1	0.541301168314129		hsa-miR-155	SNX11	0.5703938965927
				hsa-miR-155	CYP27B1	0.692026852540717		hsa-miR-155	SNX30	-0.687017050759618
				hsa-miR-155	CYP2R1	-0.617072571432494		hsa-miR-155	SOCS2	0.650771360087311
				hsa-miR-155	CYP2S1	-0.740082171915794		hsa-miR-212	SOCS2	0.626183997771604
				hsa-miR-186	CYP2S1	-0.585597290798449		hsa-miR-146a	SOD2	0.563727171486111
				hsa-miR-222	CYP2S1	-0.701285782782145		hsa-miR-155	SPAG7	0.673901872641181
				hsa-miR-29a	CYP4B1	0.602036221178609		hsa-miR-29a	SPAG7	0.597095281146299
				hsa-miR-590-5p	CYP4B1	-0.545029216800575		hsa-miR-720	SPANXB1	0.576850936325505
				hsa-miR-155	CYP4V2	-0.622979077535255		hsa-miR-155	SPATA20	-0.571162564384834
				hsa-miR-155	CYSLTR1	-0.706221321951844		hsa-miR-3663-3p	SPATA20	0.56372047708956
				hsa-miR-186	CYTH1	0.589914972319852		hsa-miR-132	SPG21	-0.571433059829418
				hsa-miR-155	CYTH4	-0.787996416775321		hsa-miR-155	SPG21	-0.655679185745558
				hsa-miR-186	CYTH4	-0.576421019322148		hsa-miR-212	SPG21	-0.635764494365213
				hsa-miR-222	CYTH4	-0.595575666088595		hsa-miR-155	SPG7	0.58154290660215
				hsa-miR-505	CYTH4	-0.539200487622269		hsa-miR-132	SPIN4	-0.602581553572371
				hsa-miR-186	CYTIP	0.559161441459072		hsa-miR-155	SPIN4	-0.591203399635102
				hsa-miR-212	CYTIP	0.541423292190539		hsa-miR-212	SPIN4	-0.590364492327412
				hsa-miR-93	CYYR1	0.622266945385735		hsa-miR-155	SPN	-0.639235235142095
				hsa-miR-1228	DAGLA	0.667391977938636		hsa-miR-155	SPON2	0.566562540118403
				hsa-miR-1234	DAGLA	0.611454134211445		hsa-miR-132	SPRED2	0.706425304203293
				hsa-miR-1238	DAGLA	0.631637715247452		hsa-miR-155	SPRED2	0.65747916106667
				hsa-miR-1281	DAGLA	0.600367171396959		hsa-miR-212	SPRED2	0.724253779577392
				hsa-miR-155	DAGLA	-0.753091403075732		hsa-miR-155	SRPRB	-0.626541482761332
				hsa-miR-505	DAGLA	-0.55274326360136		hsa-miR-222	SRPRB	-0.573341366647529
				hsa-miR-940	DAGLA	0.625722870647324		hsa-miR-155	SSBP4	-0.582304491451021
				hsa-miR-155	DBNDD1	-0.574185852901116		hsa-miR-212	SSH1	0.603466497814751
				hsa-miR-155	DBNL	0.634083027265904		hsa-miR-132	ST3GAL1	0.616534782351647
				hsa-miR-185	DBNL	-0.542864784207947		hsa-miR-212	ST3GAL1	0.693537169015138
				hsa-miR-186	DBNL	0.605280625384193		hsa-miR-762	ST3GAL5	-0.566314000272603
				hsa-miR-505	DBNL	0.544237537720701		hsa-miR-132	ST3GAL6	0.608243898187347
				hsa-miR-7	DBNL	0.601173432523175		hsa-miR-212	ST3GAL6	0.639769461176591
				hsa-miR-1228	DCBLD1	0.549071474101723		hsa-miR-132	STAT2	-0.596744849660739
				hsa-miR-155	DCBLD2	-0.568789243129143		hsa-miR-212	STAT2	-0.610722719616817
				hsa-miR-155	DCLRE1B	-0.610169860978356		hsa-miR-362-5p	STAU2	0.566695939805575
				hsa-miR-155	DCPS	-0.578093915701826		hsa-miR-132	STK17B	0.628635623344362
				hsa-miR-23b	DCTN3	-0.580205344056776		hsa-miR-155	STK17B	0.707179359824677
				hsa-miR-155	DCTPP1	-0.600137667835981		hsa-miR-212	STK17B	0.614280205596378
				hsa-miR-186	DCTPP1	-0.54568562915241		hsa-miR-222	STK17B	0.594494894840622
				hsa-miR-222	DCTPP1	-0.540142033713678		hsa-miR-212	STK24	0.567609868397914
				hsa-miR-132	DDA1	0.561921526770686		hsa-miR-660	STK36	0.569324293837701
				hsa-miR-212	DDA1	0.58333543085477		hsa-miR-132	STK4	0.657509443312077
				hsa-miR-186	DDB1	-0.541866891737332		hsa-miR-155	STK4	0.655125429972824
				hsa-miR-7	DDB1	-0.591227523914677		hsa-miR-212	STK4	0.646160437583358
				hsa-miR-505	DDHD2	0.627068207852505		hsa-miR-155	STX10	-0.620818969531429
				hsa-miR-1228	DDIT4	-0.580105274425983		hsa-miR-3663-3p	STX10	0.580996850386407
				hsa-miR-1234	DDIT4	-0.566174604101642		hsa-miR-155	STX12	-0.67752323086706
				hsa-miR-1238	DDIT4	-0.594929991066117		hsa-miR-222	STX12	-0.576503460027083
				hsa-miR-29a	DDIT4	0.616545643482612		hsa-miR-155	STX3	-0.604543026747483
				hsa-miR-940	DDIT4	-0.567713166107164		hsa-miR-212	STX3	-0.608516628389313
				hsa-miR-1228	DDX10	0.577182636487645		hsa-miR-155	SUOX	-0.576680427811289
				hsa-miR-1234	DDX10	0.571851781277584		hsa-miR-1915	SUOX	0.584040110500888
				hsa-miR-1238	DDX10	0.581361179023213		hsa-miR-3663-3p	SUOX	0.64841880692635
				hsa-miR-155	DDX10	-0.558230649540807		hsa-miR-155	SUPT4H1	-0.636141103728288
				hsa-miR-1825	DDX10	0.557710688757362		hsa-miR-212	SUPT4H1	-0.591507090872251
				hsa-miR-940	DDX10	0.560913963567765		hsa-miR-4271	SYF2	0.601983614213476
				hsa-miR-1228	DDX24	-0.560764534026552		hsa-miR-155	SYPL1	-0.580958540325654
				hsa-miR-1234	DDX24	-0.539803360836371		hsa-miR-155	TACSTD2	-0.590210017465968
				hsa-miR-1238	DDX24	-0.540680913313331		hsa-miR-222	TACSTD2	-0.599094910894821
				hsa-miR-29a	DDX24	0.580727890753332		hsa-miR-421	TACSTD2	0.598030630423625
				hsa-miR-378	DDX39	-0.574134667913323		hsa-miR-132	TAGLN2	0.700304782542816
				hsa-miR-155	DDX46	-0.646245429142531		hsa-miR-155	TAGLN2	0.650267089223402
				hsa-miR-378	DDX56	-0.578638225081654		hsa-miR-212	TAGLN2	0.749654958214112
				hsa-miR-155	DECR1	-0.585387806700054		hsa-miR-132	TAL1	-0.574771930904971
				hsa-miR-505	DECR1	-0.562581125983951		hsa-miR-155	TAL1	-0.652926130091969
				hsa-miR-29a	DEDD2	0.607378873377049		hsa-miR-212	TAL1	-0.672658680249
				hsa-miR-29c	DEDD2	0.560661082616845		hsa-miR-132	TAX1BP3	-0.570119129127733
				hsa-miR-575	DEDD2	0.550532006705543		hsa-miR-148b	TAX1BP3	0.64689788614181
				hsa-miR-155	DEF8	-0.670737618566481		hsa-miR-155	TAX1BP3	-0.735071319663925
				hsa-miR-186	DEF8	-0.587672694392264		hsa-miR-212	TAX1BP3	-0.639295804217791
				hsa-miR-222	DEF8	-0.680921203304685		hsa-miR-222	TAX1BP3	-0.620376377990494
				hsa-miR-361-5p	DEF8	0.564648834529058		hsa-miR-155	TBC1D10A	0.57427089160443
				hsa-miR-7	DEF8	-0.600106883891363		hsa-miR-132	TBC1D13	0.580347375795097
				hsa-let-7b	DEGS1	0.598883983632848		hsa-miR-155	TBC1D13	0.740778676241797
				hsa-miR-103a	DEGS1	0.579912808911277		hsa-miR-212	TBC1D13	0.621255884411533
				hsa-miR-221	DEGS1	-0.573647895372037		hsa-miR-222	TBC1D13	0.603927414490782
				hsa-miR-766	DEGS1	0.53879539611066		hsa-miR-27b	TBC1D2B	0.566230068648978
				hsa-miR-155	DEK	-0.579404087606316		hsa-miR-132	TBC1D4	0.662261052815673
				hsa-miR-200c	DEK	0.544135086780246		hsa-miR-155	TBC1D4	0.609176667595152
				hsa-miR-29a	DEK	-0.539617391262817		hsa-miR-212	TBC1D4	0.711719691781993
				hsa-miR-155	DENND4A	0.561026561137548		hsa-miR-155	TBC1D9	0.632171753205958
				hsa-miR-155	DENND4B	-0.792331109585722		hsa-miR-222	TBC1D9	0.571508188277135
				hsa-miR-132	DENND4C	-0.550613618428855		hsa-miR-1915	TBX19	0.571114829540817
				hsa-miR-212	DENND4C	-0.581274496079915		hsa-miR-212	TBX19	-0.625435506009743
				hsa-miR-155	DENND5A	0.673515810083103		hsa-miR-4271	TCEAL1	0.596126275435549
				hsa-miR-186	DENND5A	0.685862427362954		hsa-miR-132	TCEAL3	-0.57834275910793
				hsa-miR-361-5p	DENND5A	-0.589068844040508		hsa-miR-132	TCN2	0.571345637203016
				hsa-miR-155	DENR	-0.617386703808167		hsa-miR-212	TCN2	0.619368291769228
				hsa-miR-92a	DEPDC1B	-0.598008673350998		hsa-miR-212	TDRD1	-0.564093479053261
				hsa-miR-590-5p	DERL2	-0.544646531818502		hsa-miR-29a	TDRD3	-0.597383645035178
				hsa-miR-155	DEXI	0.653142117804418		hsa-miR-132	TGFA	0.621725050797829
				hsa-miR-330-3p	DFNA5	0.53887178096562		hsa-miR-212	TGFA	0.677868406781325
				hsa-miR-155	DFNB31	0.606422394474051		hsa-miR-155	TIFA	-0.627878772049618
				hsa-miR-155	DGKA	0.559553235701651		hsa-miR-132	TIMM17B	0.609632049018638
				hsa-miR-155	DGKD	-0.606606101825589		hsa-miR-155	TIMM17B	0.579407330018447
				hsa-miR-132	DHDDS	0.579351892156301		hsa-miR-212	TIMM17B	0.574810451659526
				hsa-miR-212	DHDDS	0.668847379151908		hsa-miR-212	TIMM23	0.568683899365619
				hsa-miR-378	DHPS	-0.582197871253572		hsa-miR-3663-3p	TIMM23	-0.574054216129467
				hsa-miR-505	DHPS	0.54216718729389		hsa-miR-222	TIMM8B	0.576281345226347
				hsa-miR-1228	DHRS13	-0.557646175124977		hsa-miR-7	TIMM8B	0.56347242594349
				hsa-miR-505	DHRS13	0.608215326503555		hsa-miR-132	TIMP2	-0.608240058349399
				hsa-miR-212	DHRS2	-0.565028106393732		hsa-miR-155	TIMP2	-0.62284878608594
				hsa-miR-378	DHRS2	0.555977510848596		hsa-miR-212	TIMP2	-0.679264510740825
				hsa-miR-146a	DHRS9	-0.628425013568743		hsa-miR-212	TJP2	-0.589375765820727
				hsa-miR-155	DHRS9	-0.646935872461316		hsa-miR-155	TK2	-0.581743769064398
				hsa-miR-222	DHRS9	-0.588828451646498		hsa-miR-3663-3p	TLR7	-0.605192117742659
				hsa-miR-186	DHX32	-0.56836102769891		hsa-miR-132	TM4SF1	0.640794052625434
				hsa-miR-1234	DHX40	-0.569580702389425		hsa-miR-155	TM4SF1	0.673252152915836
				hsa-miR-1238	DHX40	-0.5396636916508		hsa-miR-212	TM4SF1	0.679730961717342
				hsa-miR-155	DHX58	0.635862590380329		hsa-miR-132	TM9SF2	-0.617908938768037
				hsa-miR-186	DHX58	0.71236160593857		hsa-miR-212	TM9SF2	-0.623630529320278
				hsa-miR-222	DHX58	0.675725113308563		hsa-miR-132	TMCC2	0.636418236245681
				hsa-miR-361-5p	DHX58	-0.570434387813286		hsa-miR-155	TMCC2	0.601849306488173
				hsa-miR-7	DHX58	0.588047974939779		hsa-miR-212	TMCC2	0.738232121636536
				hsa-miR-1228	DIAPH1	0.636025450427222		hsa-miR-132	TMCC3	0.67252955617441
				hsa-miR-1234	DIAPH1	0.564847107430815		hsa-miR-155	TMCC3	0.656150507268892
				hsa-miR-1238	DIAPH1	0.610070282062772		hsa-miR-212	TMCC3	0.689840289101586
				hsa-miR-1281	DIAPH1	0.566593453236436		hsa-miR-155	TMEM106B	-0.576026511887462
				hsa-miR-155	DIAPH1	-0.741809566498538		hsa-miR-132	TMEM131	0.678797198177833
				hsa-miR-1825	DIAPH1	0.562325431187839		hsa-miR-212	TMEM131	0.67669000489353
				hsa-miR-940	DIAPH1	0.604011288076018		hsa-miR-155	TMEM132E	0.665032512036938
				hsa-miR-29a	DIAPH2	-0.540696387304482		hsa-miR-222	TMEM132E	0.612453504661363
				hsa-miR-155	DIP2B	-0.581722433568182		hsa-miR-155	TMEM140	0.630103005248483
				hsa-miR-101	DIRC2	-0.561534244139025		hsa-miR-155	TMEM147	-0.694465564136103
				hsa-miR-155	DIRC2	-0.720597158158301		hsa-miR-212	TMEM147	-0.569944716142903
				hsa-miR-222	DIRC2	-0.626914309951892		hsa-miR-222	TMEM147	-0.579346069637539
				hsa-miR-331-3p	DIRC2	0.591417973949457		hsa-miR-193b	TMEM149	-0.643880960179743
				hsa-miR-193b	DIS3L	-0.565196366943537		hsa-miR-155	TMEM14A	-0.574698495259984
				hsa-miR-155	DIXDC1	0.583659353833955		hsa-miR-155	TMEM170B	-0.570028896820588
				hsa-miR-449a	DKFZp761P0423	-0.603730957338586		hsa-miR-222	TMEM170B	-0.625478107033106
				hsa-miR-132	DLAT	0.605185181288971		hsa-miR-155	TMEM173	0.726690273807337
				hsa-miR-212	DLAT	0.708461953589201		hsa-miR-212	TMEM173	0.613491243376794
				hsa-miR-340	DLAT	-0.555299681944987		hsa-miR-155	TMEM175	-0.600686335661004
				hsa-miR-378	DLAT	-0.56591950959841		hsa-miR-212	TMEM175	-0.638583942665012
				hsa-miR-542-3p	DMAP1	-0.548387676809261		hsa-miR-132	TMEM176A	0.57204260162773
				hsa-miR-630	DMAP1	0.550766761159323		hsa-miR-155	TMEM176A	0.623858577076097
				hsa-miR-1275	DMPK	-0.546934860955287		hsa-miR-212	TMEM176A	0.652627725289933
				hsa-miR-155	DMPK	-0.693846894905857		hsa-miR-132	TMEM176B	0.589043762885615
				hsa-miR-1228	DMWD	0.551167917214842		hsa-miR-155	TMEM176B	0.675355185756844
				hsa-miR-1275	DMWD	-0.602019825403707		hsa-miR-212	TMEM176B	0.645851075600478
				hsa-miR-155	DMWD	-0.789480245257844		hsa-miR-3663-3p	TMEM20	-0.564293860368999
				hsa-miR-186	DMWD	-0.605954685239384		hsa-miR-132	TMEM200A	0.575979500180461
				hsa-miR-505	DMWD	-0.581409734910668		hsa-miR-212	TMEM200A	0.657017820765789
				hsa-miR-7	DMWD	-0.587951609552656		hsa-miR-132	TMEM205	-0.676355014654883
				hsa-miR-26a	DNAH3	0.639477575471879		hsa-miR-155	TMEM205	-0.630361553373243
				hsa-miR-93	DNAH3	0.570794203156671		hsa-miR-212	TMEM205	-0.665505725588886
				hsa-miR-1238	DNAJA4	0.544480680801581		hsa-miR-222	TMEM205	-0.565245969746011
				hsa-miR-155	DNAJA4	-0.573614953228671		hsa-miR-155	TMEM222	0.565382268334662
				hsa-miR-1238	DNAJB11	0.546091771431388		hsa-miR-3663-3p	TMEM41B	-0.570117731633551
				hsa-miR-146a	DNAJB11	-0.561895019173689		hsa-miR-3665	TMEM41B	-0.568538849408415
				hsa-miR-155	DNAJB11	-0.565424811854441		hsa-miR-4271	TMEM41B	-0.588626368891032
				hsa-miR-155	DNAJB12	0.607910552004271		hsa-miR-762	TMEM41B	-0.604581224136275
				hsa-miR-551b	DNAJB9	0.621376056999883		hsa-miR-155	TMEM50B	-0.562999854893007
				hsa-miR-29a	DNAJC10	-0.583318444620598		hsa-miR-212	TMEM55B	-0.666128716314775
				hsa-miR-27b	DNAJC12	0.557493496914031		hsa-miR-132	TMEM91	-0.582654767896266
				hsa-miR-1228	DNAJC14	-0.560644951261965		hsa-miR-155	TMEM91	-0.617215203491862
				hsa-miR-1238	DNAJC14	-0.561588109718304		hsa-miR-1915	TMEM91	0.591555739984061
				hsa-miR-1281	DNAJC14	-0.546833808020353		hsa-miR-212	TMEM91	-0.652295590460825
				hsa-miR-155	DNAJC14	0.683285879439423		hsa-miR-3663-3p	TMEM91	0.716833644636242
				hsa-miR-4310	DNAJC14	-0.545523153157459		hsa-miR-155	TMTC4	-0.582017474126899
				hsa-miR-155	DNAJC18	0.684966631034551		hsa-miR-155	TMX4	-0.577207896182489
				hsa-miR-505	DNAJC18	0.560301597640002		hsa-miR-132	TNFAIP2	0.563808386684511
				hsa-miR-330-3p	DNAJC27	-0.556019538364968		hsa-miR-155	TNFAIP2	0.583580659371184
				hsa-miR-155	DNAJC3	-0.568969210864014		hsa-miR-212	TNFAIP2	0.587709900065947
				hsa-miR-29c	DNM1L	-0.594995266617234		hsa-miR-132	TNFRSF11B	0.641633044398393
				hsa-miR-155	DNMT1	-0.671199518424938		hsa-miR-155	TNFRSF11B	0.641643817696714
				hsa-miR-505	DNMT1	-0.552470526398948		hsa-miR-212	TNFRSF11B	0.701354884312225
				hsa-miR-222	DNPEP	0.552400893438458		hsa-miR-155	TNFRSF9	0.645370695563359
				hsa-miR-155	DOCK2	-0.783917343867961		hsa-miR-129-3p	TNFSF12	-0.568426388638338
				hsa-miR-505	DOCK2	-0.57782504906166		hsa-miR-132	TNFSF13B	0.588975891960889
				hsa-miR-1228	DOCK7	0.551151629674146		hsa-miR-155	TNFSF13B	0.64063859061838
				hsa-miR-1238	DOCK7	0.544234726938591		hsa-miR-212	TNFSF13B	0.644434263206838
				hsa-miR-155	DOCK7	-0.729919067188793		hsa-miR-132	TNFSF18	0.567063118283011
				hsa-miR-155	DOK2	-0.552758944454884		hsa-miR-212	TNFSF18	0.601762122442967
				hsa-miR-222	DOK2	-0.586942553085358		hsa-miR-3663-3p	TNFSF18	-0.593390008083878
				hsa-miR-1238	DOLPP1	0.580259696418602		hsa-miR-132	TNFSF4	0.683197251308402
				hsa-miR-1228	DPAGT1	0.560903812302134		hsa-miR-155	TNFSF4	0.690721476014138
				hsa-miR-1238	DPAGT1	0.545751307239298		hsa-miR-212	TNFSF4	0.742185438418903
				hsa-miR-155	DPAGT1	-0.618003709920144		hsa-miR-222	TNFSF4	0.566991764188346
				hsa-miR-146a	DPH5	0.616070421664996		hsa-miR-155	TNPO2	0.657724737780832
				hsa-miR-155	DPH5	0.641813254182384		hsa-miR-212	TNPO2	0.575905762947399
				hsa-miR-193a-3p	DPP9	-0.572422742885131		hsa-miR-1307	TOMM20	-0.582774790126313
				hsa-miR-374a	DPP9	-0.546824692573856		hsa-miR-222	TOMM20	-0.565917189272048
				hsa-miR-132	DPYD	-0.544247098146149		hsa-miR-132	TOMM34	0.678108439691175
				hsa-miR-212	DPYD	-0.626028568015657		hsa-miR-155	TOMM34	0.594731655281945
				hsa-miR-155	DPYSL2	-0.562284834647604		hsa-miR-212	TOMM34	0.677957245394706
				hsa-miR-1228	DR1	0.575246362894782		hsa-miR-155	TOMM5	0.605391984692577
				hsa-miR-1238	DR1	0.553621328874902		hsa-miR-155	TOP1MT	-0.616224934006071
				hsa-miR-1281	DR1	0.574573081198885		hsa-miR-155	TOX	-0.602134379480396
				hsa-miR-155	DR1	-0.57909488001649		hsa-miR-132	TOX2	0.565753724011831
				hsa-miR-1825	DR1	0.54848829010795		hsa-miR-212	TOX2	0.58876017847908
				hsa-miR-940	DR1	0.624203703554853		hsa-miR-132	TP53BP2	0.604076041796544
				hsa-miR-155	DRAM1	0.735761418669573		hsa-miR-212	TP53BP2	0.623200054941655
				hsa-miR-29a	DRAP1	-0.644668812032699		hsa-miR-212	TPD52L2	0.583065711041944
				hsa-miR-129-3p	DRG1	0.567471905338461		hsa-miR-155	TPP1	-0.611923293494943
				hsa-miR-155	DSC2	0.610203364108113		hsa-miR-193b	TPRG1	-0.632167639401156
				hsa-miR-505	DSC2	0.53891476306851		hsa-miR-4317	TPRG1	-0.585445690573313
				hsa-miR-449a	DSCR3	0.572553332107907		hsa-miR-132	TPST1	0.608539619406334
				hsa-miR-155	DTNA	-0.622008671684075		hsa-miR-155	TPST1	0.591829332380976
				hsa-miR-222	DTNA	-0.566660852545898		hsa-miR-212	TPST1	0.614813459666262
				hsa-miR-27b	DTNA	0.574257069363579		hsa-miR-155	TPST2	-0.632729233503312
				hsa-miR-186	DTX3L	0.610299447800909		hsa-miR-132	TRAF1	0.647321270212246
				hsa-miR-155	DUOX1	-0.725975321602942		hsa-miR-155	TRAF1	0.634239830267658
				hsa-miR-185	DUOX1	0.561232186486501		hsa-miR-212	TRAF1	0.691032815330136
				hsa-miR-186	DUOX1	-0.545844319490566		hsa-miR-212	TRAF5	0.571541062860819
				hsa-miR-222	DUOX1	-0.565293247211923		hsa-miR-155	TRAM1	-0.608269846777295
				hsa-miR-361-5p	DUOX1	0.623430846832716		hsa-miR-212	TRAM1	-0.618553558422548
				hsa-miR-378	DUOX1	0.565446930868482		hsa-miR-1915	TREM2	0.571555616397766
				hsa-miR-505	DUOX1	-0.563815472790173		hsa-miR-212	TREM2	-0.597485370633145
				hsa-miR-155	DUOXA1	-0.609310721697141		hsa-miR-3663-3p	TREM2	0.614671002735981
				hsa-miR-186	DUOXA1	-0.5570121654657		hsa-miR-212	TRIM2	0.588388901559087
				hsa-miR-1275	DUSP1	0.539550221664956		hsa-miR-3663-3p	TRMT61A	-0.610290412976282
				hsa-miR-155	DUSP1	0.610083926721299		hsa-miR-762	TRMT61A	-0.577270454565496
				hsa-miR-29a	DUSP16	0.565332266788936		hsa-miR-551b	TSEN2	-0.622268162295624
				hsa-miR-93	DUSP2	0.590247681200035		hsa-miR-155	TSHZ3	-0.603787489836016
				hsa-miR-1228	DUSP23	0.568214866303209		hsa-miR-132	TSPAN13	0.647438024266695
				hsa-miR-155	DUSP23	-0.729732837215834		hsa-miR-155	TSPAN13	0.596752155392664
				hsa-miR-940	DUSP23	0.540927570196638		hsa-miR-212	TSPAN13	0.670665777171138
				hsa-miR-155	DUSP28	-0.575100194655856		hsa-miR-3663-3p	TSPAN3	0.602035271365759
				hsa-let-7b	DUSP3	0.551730805665136		hsa-miR-762	TSPAN3	0.611490058480723
				hsa-miR-29a	DUSP3	0.543751277130903		hsa-miR-212	TSPAN32	-0.56798742884606
				hsa-miR-155	DUSP5	0.58793636683173		hsa-miR-155	TSPAN7	-0.581460113447044
				hsa-miR-1202	DUSP6	0.54379024244433		hsa-miR-155	TTC13	-0.614394959761002
				hsa-miR-1268	DUSP6	0.559025151636612		hsa-miR-222	TTC3	-0.606230270344352
				hsa-miR-642b	DUSP6	0.578459032528247		hsa-miR-212	TTF2	0.58404854754192
				hsa-miR-129-3p	DUT	-0.541698660368937		hsa-miR-212	TTK	0.597973629287972
				hsa-miR-155	DYM	-0.57334816328359		hsa-miR-155	TUBB2A	0.688006921981026
				hsa-miR-186	DYM	-0.562724456250633		hsa-miR-222	TUBB2A	0.567853104549922
				hsa-miR-1275	DYNC1H1	-0.544259697502702		hsa-miR-3663-3p	TUBB2A	-0.570232347427181
				hsa-miR-155	DYNC1H1	-0.628203757793785		hsa-miR-132	TUBB2B	0.622693602526016
				hsa-miR-7	DYNC1H1	-0.553843016072421		hsa-miR-155	TUBB2B	0.59061708790591
				hsa-miR-1228	DYNC1LI2	0.565802193749347		hsa-miR-212	TUBB2B	0.640378160616003
				hsa-miR-1238	DYNC1LI2	0.559386680520816		hsa-miR-3663-3p	TUBB2C	-0.61631559168623
				hsa-miR-1281	DYNC1LI2	0.548185375416678		hsa-miR-155	TUBB4Q	0.67182247547104
				hsa-miR-155	DYNC1LI2	-0.571587146891329		hsa-miR-3663-3p	TUBB4Q	-0.624199326206631
				hsa-miR-940	DYNC1LI2	0.55469773475196		hsa-miR-155	TWSG1	0.65503260089021
				hsa-miR-155	DYNLT1	0.585214365227814		hsa-miR-3663-3p	TWSG1	-0.608625957443602
				hsa-miR-186	DYNLT1	0.666987342254649		hsa-miR-590-5p	TXNL4B	0.6162770878718
				hsa-miR-222	DYNLT1	0.600001372241223		hsa-miR-212	UAP1	0.588745577120276
				hsa-miR-155	DYRK2	-0.714322802372965		hsa-miR-181b	UBASH3B	-0.56845311972702
				hsa-miR-155	DYRK3	0.638768422279476		hsa-miR-148b	UBE2F	-0.577704766607516
				hsa-miR-200c	DYRK3	-0.57179165182198		hsa-miR-155	UBL7	-0.567353766958603
				hsa-miR-212	DYRK4	-0.545937022654495		hsa-miR-3663-3p	UBL7	0.64177328735464
				hsa-miR-155	EAF2	0.613188002317789		hsa-miR-421	UBQLN2	-0.585147609472159
				hsa-miR-454	EAF2	0.54019244370078		hsa-miR-132	UBR7	-0.611003090777083
				hsa-miR-1280	EARS2	0.556941777692894		hsa-miR-212	UBR7	-0.623693558420117
				hsa-miR-155	EBI3	0.656315610207702		hsa-miR-155	UCHL1	0.608517414030368
				hsa-miR-185	EBI3	-0.623038671503959		hsa-miR-222	UCHL1	0.563615804108622
				hsa-miR-186	EBI3	0.621062259568235		hsa-miR-132	UGCG	0.680485040748398
				hsa-miR-26a	EBI3	0.580757067994743		hsa-miR-155	UGCG	0.67578885760456
				hsa-miR-378	EBI3	-0.585881267463207		hsa-miR-212	UGCG	0.699193953994827
				hsa-miR-505	EBI3	0.641792624804071		hsa-miR-3663-3p	ULK1	0.593156103666937
				hsa-miR-7	EBI3	0.559317384628297		hsa-miR-155	UPB1	0.672698392706879
				hsa-miR-330-3p	EBPL	-0.542282520672489		hsa-miR-212	UPB1	0.566863111643056
				hsa-miR-155	ECE1	0.563250368162824		hsa-miR-155	UQCRH	-0.668951639173586
				hsa-miR-212	ECE1	0.577917977131098		hsa-miR-212	UQCRH	-0.577855259815914
				hsa-miR-26a	ECE1	0.570606438483746		hsa-miR-222	UQCRH	-0.625931799609484
				hsa-miR-378	ECE1	-0.574914453377913		hsa-miR-212	UQCRQ	-0.562824155741996
				hsa-miR-505	ECE1	0.66160055521052		hsa-miR-27b	USF1	0.603859017986813
				hsa-miR-92a	ECE1	0.546920769523779		hsa-miR-212	VAMP7	-0.569396394127387
				hsa-miR-193b	ECHS1	-0.562824108390668		hsa-miR-155	VASH1	-0.612380376077762
				hsa-miR-155	ECM1	-0.647250389024073		hsa-miR-155	VASN	0.612110671292884
				hsa-miR-185	ECM1	0.618632371791168		hsa-miR-132	VAV2	0.687760243507576
				hsa-miR-378	ECM1	0.565785251277599		hsa-miR-155	VAV2	0.604083080491959
				hsa-miR-505	ECM1	-0.616282399381003		hsa-miR-212	VAV2	0.679517193161933
				hsa-miR-155	EDARADD	0.573205909422883		hsa-miR-155	VCL	-0.588380350123953
				hsa-miR-103a	EDEM1	0.551582844260911		hsa-miR-155	VCP	0.610958230496216
				hsa-miR-1228	EDF1	-0.546029410047017		hsa-miR-212	VPS37C	0.568694267688958
				hsa-miR-129-3p	EDF1	0.554829895276461		hsa-miR-3663-3p	VPS37C	-0.595673367236766
				hsa-miR-29a	EDF1	0.579292534552889		hsa-miR-155	VPS45	-0.571135590066124
				hsa-miR-940	EDF1	-0.543542378567744		hsa-miR-155	VPS8	0.666944032368373
				hsa-miR-1238	EDN1	-0.555156080954004		hsa-miR-155	VWA5A	-0.576835329449941
				hsa-miR-155	EDN1	0.557859410451975		hsa-miR-148b	WAS	0.583576602368069
				hsa-miR-155	EEF2K	-0.623399496290405		hsa-miR-155	WAS	-0.670181532717985
				hsa-miR-155	EFCAB4A	-0.611485825736483		hsa-miR-212	WDR61	-0.567797106136429
				hsa-miR-185	EFCAB4A	0.53959305619616		hsa-miR-132	WDR67	-0.562680455250864
				hsa-miR-186	EFCAB4A	-0.548785092016135		hsa-miR-212	WDR67	-0.610049965170265
				hsa-miR-155	EFHD2	-0.675980494247233		hsa-miR-3663-3p	WDR67	0.566588192284276
				hsa-miR-222	EFHD2	-0.540412886265467		hsa-miR-132	WHAMM	0.565253234231136
				hsa-miR-186	EFNB1	-0.541614341565451		hsa-miR-155	WHAMM	0.690090696436423
				hsa-miR-665	EFTUD1	-0.551205141002408		hsa-miR-212	WHAMM	0.662815583211409
				hsa-miR-155	EGFL6	0.597025751942152		hsa-miR-362-5p	XRCC3	-0.578487064404889
				hsa-miR-210	EGLN1	0.662124987820106		hsa-miR-132	XRCC6	0.596128915521958
				hsa-let-7b	EHBP1	-0.648999798540731		hsa-miR-2861	XRRA1	-0.613637774605332
				hsa-let-7c	EHBP1	-0.598180413766127		hsa-miR-212	YIPF1	-0.568493333592803
				hsa-miR-103a	EHBP1	-0.728446023780216		hsa-miR-155	YPEL5	0.611246239605397
				hsa-miR-212	EHBP1	-0.541619050550022		hsa-miR-34a	YTHDF2	-0.564313400479546
				hsa-miR-221	EHBP1	0.577846256315483		hsa-miR-132	YWHAG	0.593677661413429
				hsa-miR-330-3p	EHBP1	-0.630051059081874		hsa-miR-212	ZBTB17	0.566013499425636
				hsa-miR-93	EHBP1	-0.602888692188888		hsa-miR-132	ZDHHC16	0.59100086634264
				hsa-miR-155	EHD1	0.56664586018824		hsa-miR-212	ZDHHC16	0.615343633998041
				hsa-miR-155	EHF	0.651254179030401		hsa-miR-132	ZFAND5	0.676589843046186
				hsa-miR-155	EHHADH	0.622911284409363		hsa-miR-212	ZFAND5	0.681155818471419
				hsa-miR-421	EIF3L	0.57520323042053		hsa-miR-155	ZFP106	-0.664358928474141
				hsa-miR-1228	ELF1	0.552753779974432		hsa-miR-421	ZFPL1	-0.610979690751271
				hsa-miR-93	ELF1	-0.559825185125718		hsa-miR-155	ZIK1	-0.575700296246032
				hsa-miR-940	ELF1	0.564339312527446		hsa-miR-155	ZNF211	-0.679530701465621
				hsa-miR-155	ELK1	0.657399093872473		hsa-miR-212	ZNF211	-0.571606429548531
				hsa-miR-29a	ELK1	0.604195473495488		hsa-miR-155	ZNF232	-0.599802408119565
				hsa-miR-378	ELK1	-0.556463476793858		hsa-miR-362-5p	ZNF232	0.565125488824383
				hsa-miR-155	ELL	-0.549105220868084		hsa-miR-132	ZNF296	0.622553840691738
				hsa-miR-222	ELL	-0.566031190438229		hsa-miR-212	ZNF296	0.628174276428999
				hsa-miR-155	ELL2	0.6781747620556		hsa-miR-155	ZNF585A	-0.573022905097892
				hsa-miR-26a	ELL2	0.541334474768441		hsa-miR-132	ZNF586	-0.584439633004919
				hsa-miR-378	ELL2	-0.543519139392508		hsa-miR-155	ZNF586	-0.672010940776961
				hsa-miR-505	ELL2	0.572324476702763		hsa-miR-212	ZNF586	-0.57610933285161
				hsa-miR-186	ELL3	0.546426194300712		hsa-miR-155	ZNF615	-0.605194261902867
				hsa-miR-222	ELL3	0.56532736742069		hsa-miR-362-5p	ZNF618	-0.588126733478005
				hsa-miR-1280	ELMO1	0.554590281331731		hsa-miR-212	ZNF827	0.603179230874489
				hsa-miR-155	ELMO1	-0.706519737759808		hsa-miR-3663-3p	ZNF827	-0.586094273232548
				hsa-miR-185	ELMO1	0.544250167139593		hsa-miR-132	ZSWIM4	0.651782393723036
				hsa-miR-186	ELMO1	-0.549782812530996		hsa-miR-212	ZSWIM4	0.656135171733934
				hsa-miR-222	ELMO1	-0.543899211975345		hsa-miR-132	ALDH3B1	-0.615531678326737
				hsa-miR-361-5p	ELMO1	0.552577852384415		hsa-miR-155	ALDH3B1	-0.652330361020849
				hsa-miR-7	ELMO1	-0.615847618772469		hsa-miR-212	ALDH3B1	-0.651505827566152
				hsa-miR-155	ELMO2	0.606222978891084		hsa-miR-155	C17orf44	-0.61799860750092
				hsa-miR-186	ELMO2	0.56953173187389		hsa-miR-155	C8orf51	-0.61460420993004
				hsa-miR-378	ELMO2	-0.542234631894258		hsa-miR-155	FLJ13224	0.603023884378812
				hsa-miR-421	ELMO2	-0.561786134614836		hsa-miR-222	FLJ13224	0.576643834221176
				hsa-miR-29a	EMD	0.542483434728167		hsa-miR-3663-3p	KIAA0040	-0.634249778885039
				hsa-miR-93	EMD	0.558766917425157		hsa-miR-155	LOC113230	-0.577081236394914
				hsa-miR-29a	EML4	-0.580460620931561		hsa-miR-155	LOC286411	-0.581662894988427
				hsa-miR-155	EMX1	-0.578693686669237		hsa-miR-155	LOC389641	-0.604865993334824
				hsa-miR-222	EMX1	-0.568042998023143		hsa-miR-222	SCAMP1	-0.571386689458582
				hsa-miR-222	ENDOD1	0.541312689004058		hsa-miR-212	ZNF702P	-0.577354832968847
				hsa-miR-155	ENSA	0.633305944379786
				hsa-miR-155	ENTHD1	0.770658523226329
				hsa-miR-222	ENTHD1	0.55950611554107
				hsa-miR-146a	ENTPD1	-0.585227377398042
				hsa-miR-222	ENTPD1	-0.672787685793893
				hsa-miR-330-3p	ENTPD3	0.590608559997588
				hsa-miR-1275	ENTPD6	-0.54134443726359
				hsa-miR-155	ENTPD6	-0.757467592193724
				hsa-miR-505	ENTPD6	-0.568977024892046
				hsa-miR-1307	EPCAM	-0.564188038011419
				hsa-miR-155	EPCAM	-0.597745786143829
				hsa-miR-378	EPCAM	0.55364170526387
				hsa-miR-1275	EPDR1	0.553427139317546
				hsa-miR-155	EPDR1	0.652717131111691
				hsa-miR-26a	EPDR1	0.588326579940553
				hsa-miR-378	EPDR1	-0.595332983067431
				hsa-miR-421	EPDR1	-0.541053004415036
				hsa-miR-505	EPDR1	0.626815275632089
				hsa-miR-93	EPDR1	0.573624489104609
				hsa-miR-155	EPM2AIP1	0.568603747137544
				hsa-miR-210	EPOR	0.569526593162533
				hsa-miR-155	EPS15	0.653913527863861
				hsa-miR-29a	EPS15L1	0.56983797584518
				hsa-miR-222	EPSTI1	0.53997947427687
				hsa-miR-212	ERAL1	0.550598447352811
				hsa-miR-378	ERAL1	-0.621693998796079
				hsa-miR-155	ERGIC1	0.56841457729427
				hsa-miR-212	ERGIC3	-0.60303624259515
				hsa-miR-221	ERGIC3	0.582871427444015
				hsa-miR-155	ERICH1	0.61564988414415
				hsa-miR-210	ERO1L	0.555631100974404
				hsa-miR-193b	ERP29	-0.619979351911625
				hsa-miR-1238	ERP44	0.553914083320571
				hsa-miR-103a	ERRFI1	0.569161313125836
				hsa-miR-146a	ERRFI1	-0.61684834332405
				hsa-miR-222	ERRFI1	-0.61265847406122
				hsa-miR-766	ERRFI1	0.600327729941364
				hsa-miR-212	ESAM	-0.581500794576504
				hsa-miR-221	ESAM	0.581815498635246
				hsa-miR-378	ESAM	0.610535588610345
				hsa-miR-99a	ESD	-0.545071691596267
				hsa-miR-1275	ESYT1	-0.553223585490357
				hsa-miR-155	ESYT1	-0.751191151335005
				hsa-miR-186	ESYT1	-0.546080893528454
				hsa-miR-222	ESYT1	-0.590031777539773
				hsa-miR-7	ESYT1	-0.544429952293272
				hsa-miR-155	ETFB	-0.560494318852065
				hsa-miR-186	ETFB	-0.631458146861408
				hsa-miR-212	ETFB	-0.560949082012527
				hsa-miR-27a	ETFB	0.570089521514352
				hsa-miR-222	ETFDH	0.564671884498386
				hsa-miR-29a	ETS2	0.662597477897372
				hsa-miR-1280	ETV5	0.546560303049036
				hsa-miR-146a	ETV5	-0.637194679049502
				hsa-miR-155	ETV5	-0.691604432880813
				hsa-miR-222	ETV5	-0.652422235852803
				hsa-miR-766	ETV5	0.668169971060063
				hsa-miR-155	EVI2A	-0.631572228570192
				hsa-miR-186	EVI2A	-0.54240047206586
				hsa-miR-505	EVI2A	-0.585617948591163
				hsa-miR-1228	EVI2B	0.561671338735493
				hsa-miR-1238	EVI2B	0.548283275344882
				hsa-miR-155	EVI2B	-0.730342626678971
				hsa-miR-505	EVI2B	-0.662374052844389
				hsa-miR-155	EVI5L	-0.613572030555673
				hsa-miR-186	EVI5L	-0.562721254837562
				hsa-miR-155	EVL	-0.790700251064264
				hsa-miR-186	EVL	-0.569018577756069
				hsa-miR-222	EVL	-0.547480731967457
				hsa-miR-505	EVL	-0.546628584258917
				hsa-miR-155	EXOC2	-0.640241532274176
				hsa-miR-155	EXOSC10	0.539440429367409
				hsa-miR-378	EXOSC10	-0.562107875012297
				hsa-miR-186	EXOSC5	-0.577510446089048
				hsa-miR-197	EZH2	-0.575243986119863
				hsa-miR-212	FAIM2	-0.543704523805793
				hsa-miR-27a	FAIM2	0.583706417398556
				hsa-miR-378	FAIM2	0.595220497225403
				hsa-miR-505	FAIM2	-0.647888697204292
				hsa-miR-1228	FAM102B	0.615073962805397
				hsa-miR-1234	FAM102B	0.61042605148324
				hsa-miR-1238	FAM102B	0.60763533733311
				hsa-miR-1281	FAM102B	0.548752331405092
				hsa-miR-146a	FAM102B	-0.540532068536739
				hsa-miR-155	FAM102B	-0.740253992633697
				hsa-miR-1825	FAM102B	0.583846260520084
				hsa-miR-940	FAM102B	0.621692764985261
				hsa-miR-155	FAM105A	-0.816784122902014
				hsa-miR-222	FAM105A	-0.568068005750768
				hsa-miR-505	FAM105A	-0.608624516852562
				hsa-miR-29a	FAM107B	0.603731554021071
				hsa-miR-221	FAM108C1	-0.555807938612792
				hsa-miR-155	FAM109A	-0.67614112928882
				hsa-miR-186	FAM109A	-0.592100663953938
				hsa-miR-29a	FAM111A	-0.56568934810722
				hsa-miR-103a	FAM113A	-0.55842767192924
				hsa-miR-29a	FAM113A	-0.593316670050912
				hsa-miR-155	FAM118B	-0.665492322638057
				hsa-miR-222	FAM118B	-0.559817185249552
				hsa-miR-7	FAM118B	-0.557854232783203
				hsa-miR-155	FAM129B	-0.678588503698248
				hsa-miR-186	FAM129B	-0.548444930399024
				hsa-miR-29a	FAM134B	0.6413902246889
				hsa-miR-146a	FAM135B	-0.550115576218357
				hsa-miR-155	FAM135B	-0.563623248817378
				hsa-miR-222	FAM135B	-0.622402048419309
				hsa-miR-27b	FAM135B	0.627116539280412
				hsa-miR-1228	FAM136A	0.567288989640718
				hsa-miR-1234	FAM136A	0.595089965233065
				hsa-miR-1238	FAM136A	0.560430222675876
				hsa-miR-1280	FAM136A	0.560415903084368
				hsa-miR-1281	FAM136A	0.571773270877193
				hsa-miR-1825	FAM136A	0.550839777135049
				hsa-miR-4323	FAM136A	0.578063300469027
				hsa-miR-766	FAM136A	0.629378010343043
				hsa-miR-940	FAM136A	0.596715961126821
				hsa-miR-155	FAM149B1	0.567828917208752
				hsa-miR-155	FAM156A	-0.724809638938063
				hsa-miR-186	FAM156A	-0.54342449638673
				hsa-miR-505	FAM156A	-0.628972127815979
				hsa-miR-155	FAM160A2	-0.696358900852694
				hsa-miR-155	FAM165B	-0.561588334394647
				hsa-miR-7	FAM168B	-0.608940928651031
				hsa-miR-1307	FAM177A1	0.554480888524866
				hsa-miR-155	FAM177A1	0.563996265661784
				hsa-miR-186	FAM177A1	0.567920121144462
				hsa-miR-505	FAM26F	-0.547956931473647
				hsa-miR-155	FAM38A	-0.706830913352529
				hsa-miR-155	FAM46C	-0.677744135392676
				hsa-miR-222	FAM46C	-0.579356577667458
				hsa-miR-155	FAM53A	-0.58958370259631
				hsa-miR-505	FAM53A	-0.571813548349135
				hsa-miR-29a	FAM57A	0.546551101157659
				hsa-miR-155	FAM59B	-0.544831915710058
				hsa-miR-155	FAM60A	0.618667685275719
				hsa-miR-186	FAM60A	0.556595200466162
				hsa-miR-26a	FAM60A	0.559389412967021
				hsa-miR-378	FAM60A	-0.550336418167115
				hsa-miR-505	FAM60A	0.597627795919068
				hsa-miR-7	FAM60A	0.539003971833948
				hsa-miR-330-3p	FAM83D	0.562037827955121
				hsa-miR-330-3p	FAM83F	0.543550539230584
				hsa-miR-378	FAM8A1	0.548355148420021
				hsa-miR-155	FAM90A1	-0.562635064875682
				hsa-miR-186	FAM90A1	-0.566817776982663
				hsa-miR-155	FAM96A	-0.556124454456503
				hsa-miR-421	FAM98C	0.539771968373791
				hsa-miR-1228	FAR1	0.551796175263878
				hsa-miR-155	FAR1	-0.613735072338792
				hsa-miR-132	FASN	0.577248712017268
				hsa-miR-212	FASN	0.55600045187601
				hsa-miR-197	FASTKD3	-0.574402343536365
				hsa-miR-155	FASTKD5	-0.588320381978348
[truncated: 4,057 more rows]

## Sheet: Table S6
Table S6. KEGG Pathways and GO categories enriched among mRNAs significantly correlated with the expression of differentially expressed miRNAs in MTB-infected samples
miRNA1	Category	Subcategory	Subcategory alternative name	expected	observed	p-value (fdr)	enrichment
miR-7 (108)	KEGG	RIG-I-like receptor signaling pathway	4622	0.494612	4	0.0362545	up
miR-27a (62)	KEGG	Systemic lupus erythematosus	5322	0.58917	4	0.0478847	up
	Gene Ontology	leukocyte differentiation	GO:0002521	0.82787	7	0.00499963	up
	Gene Ontology	positive regulation of CD4-positive, alpha beta T cell differentiation	GO:0043372	0.0477617	3	0.00499963	up
	Gene Ontology	regulation of CD4-positive, alpha beta T cell differentiation	GO:0043370	0.0689891	3	0.00743374	up
	Gene Ontology	asialoglycoprotein receptor activity	GO:0004873	0.0159206	2	0.0104059	up
	Gene Ontology	CD4-positive, alpha beta T cell differentiation	GO:0043367	0.0955234	3	0.0104059	up
	Gene Ontology	positive regulation of alpha-beta T cell differentiation	GO:0046638	0.0902166	3	0.0104059	up
	Gene Ontology	positive regulation of alpha-beta T cell activation	GO:0046635	0.106137	3	0.0123668	up
	Gene Ontology	regulation of alpha-beta T cell differentiation	GO:0046637	0.111444	3	0.0125768	up
	Gene Ontology	hemopoiesis	GO:0030097	1.34794	7	0.0150848	up
	Gene Ontology	interleukin-2 production	GO:0032623	0.148592	3	0.0150848	up
	Gene Ontology	interleukin-4 production	GO:0032633	0.0318411	2	0.0150848	up
	Gene Ontology	regulation of interleukin-2 production	GO:0032663	0.132671	3	0.0150848	up
	Gene Ontology	regulation of interleukin-4 production	GO:0032673	0.0318411	2	0.0150848	up
	Gene Ontology	positive regulation of T cell differentiation	GO:0045582	0.132671	3	0.0150848	up
	Gene Ontology	positive regulation of lymphocyte differentiation	GO:0045621	0.132671	3	0.0150848	up
	Gene Ontology	regulation of alpha-beta T cell activation	GO:0046634	0.148592	3	0.0150848	up
	Gene Ontology	sugar binding	GO:0005529	0.65805	5	0.0156177	up
	Gene Ontology	positive regulation of cell differentiation	GO:0045597	1.01892	6	0.0156177	up
	Gene Ontology	hemopoietic or lymphoid organ development	GO:0048534	1.41693	7	0.0156177	up
	Gene Ontology	positive regulation of T-helper cell differentiation	GO:0045624	0.037148	2	0.0162745	up
	Gene Ontology	alpha-beta T cell differentiation	GO:0046632	0.169819	3	0.0171402	up
	Gene Ontology	immune system development	GO:0002520	1.51776	7	0.0196817	up
	Gene Ontology	regulation of myeloid leukocyte differentiation	GO:0002761	0.201661	3	0.0260214	up
	Gene Ontology	positive regulation of interleukin-2 biosynthetic process	GO:0045086	0.0530686	2	0.0287603	up
	Gene Ontology	regulation of T cell differentiation	GO:0045580	0.217581	3	0.0287603	up
	Gene Ontology	alpha-beta T cell activation	GO:0046631	0.217581	3	0.0287603	up
	Gene Ontology	carbohydrate binding	GO:0030246	1.22588	6	0.0287895	up
	Gene Ontology	regulation of cell differentiation	GO:0045595	2.20765	8	0.0297122	up
	Gene Ontology	regulation of T-helper cell differentiation	GO:0045622	0.0583754	2	0.0297122	up
	Gene Ontology	regulation of lymphocyte differentiation	GO:0045619	0.244115	3	0.0348323	up
	Gene Ontology	exonuclease activity	GO:0004527	0.249422	3	0.0358718	up
	Gene Ontology	lymphocyte differentiation	GO:0030098	0.541299	4	0.0368504	up
	Gene Ontology	coreceptor activity	GO:0015026	0.074296	2	0.0417301	up
	Gene Ontology	positive regulation of developmental process	GO:0051094	1.38509	6	0.0423846	up
	Gene Ontology	CD4-positive, alpha-beta T cell differentiation involved in immune response	GO:0002294	0.0796028	2	0.0427982	up
	Gene Ontology	T-helper cell differentiation	GO:0042093	0.0796028	2	0.0427982	up
	Gene Ontology	regulation of interleukin-2 biosynthetic process	GO:0045076	0.0796028	2	0.0427982	up
	Gene Ontology	alpha-beta T cell activation involved in immune response	GO:0002287	0.0849097	2	0.0439899	up
	Gene Ontology	T cell differentiation involved in immune response	GO:0002292	0.0849097	2	0.0439899	up
	Gene Ontology	alpha-beta T cell differentiation involved in immune response	GO:0002293	0.0849097	2	0.0439899	up
	Gene Ontology	interleukin-2 biosynthetic process	GO:0042094	0.0849097	2	0.0439899	up
	Gene Ontology	nuclease activity	GO:0004518	0.626209	4	0.0476054	up
	Gene Ontology	regulation of developmental process	GO:0050793	3.12574	9	0.0485866	up
miR-103a (54/53)	KEGG	Biosynthesis of unsaturated fatty acids	1040	0.075431	2	0.0144881	up
miR-129-3p (45/43)	KEGG	Glycerolipid metabolism	561	0.135776	2	0.0464116	up
	Gene Ontology	acetyl-CoA hydrolase activity	GO:0003986	0.00718993	2	0.00466836	up
	Gene Ontology	nucleoside metabolic process	GO:0009116	0.186938	4	0.00637647	up
	Gene Ontology	activation-induced cell death of T cells	GO:0006924	0.0143799	2	0.00929412	up
	Gene Ontology	ribonucleoside metabolic process	GO:0009119	0.143799	3	0.0206744	up
	Gene Ontology	pyrimidine nucleoside triphosphate metabolic process	GO:0009147	0.0287597	2	0.0206744	up
	Gene Ontology	coenzyme A metabolic process	GO:0015936	0.0323547	2	0.0206744	up
	Gene Ontology	CoA hydrolase activity	GO:0016289	0.0323547	2	0.0206744	up
	Gene Ontology	positive regulation of activated T cell proliferation	GO:0042104	0.0323547	2	0.0206744	up
	Gene Ontology	T cell apoptosis	GO:0070231	0.0359497	2	0.0229192	up
	Gene Ontology	nucleoside bisphosphate metabolic process	GO:0033865	0.0395446	2	0.0251536	up
	Gene Ontology	acyl-CoA metabolic process	GO:0006637	0.0467346	2	0.0273154	up
	Gene Ontology	thioester metabolic process	GO:0035383	0.0467346	2	0.0273154	up
	Gene Ontology	regulation of activated T cell proliferation	GO:0046006	0.0431396	2	0.0273154	up
	Gene Ontology	coenzyme metabolic process	GO:0006732	0.474536	4	0.0330291	up
	Gene Ontology	pyrimidine nucleoside metabolic process	GO:0006213	0.0611144	2	0.03609	up
	Gene Ontology	T cell homeostasis	GO:0043029	0.0575195	2	0.03609	up
	Gene Ontology	activated T cell proliferation	GO:0050798	0.0611144	2	0.03609	up
	Gene Ontology	mitochondrion	GO:0005739	3.55542	10	0.042239	up
	Gene Ontology	lymphocyte apoptosis	GO:0070227	0.0683044	2	0.042239	up
	Gene Ontology	mitochondrial outer membrane	GO:0005741	0.276812	3	0.0462868	up
	Gene Ontology	group transfer coenzyme metabolic process	GO:0006752	0.0754943	2	0.0462868	up
	Gene Ontology	lymphocyte homeostasis	GO:0002260	0.0826842	2	0.0475168	up
	Gene Ontology	manganese ion binding	GO:0030145	0.0826842	2	0.0475168	up
	Gene Ontology	cofactor metabolic process	GO:0051186	0.607549	4	0.0475168	up
miR-132 (82/81)	Gene Ontology	proteasome complex	GO:0000502	0.34272	5	0.0128499	up
	Gene Ontology	proteolysis	GO:0006508	3.63152	13	0.0128499	up
	Gene Ontology	S-acetyltransferase activity	GO:0016418	0.0131815	2	0.0128499	up
	Gene Ontology	ubiquitin-dependent protein catabolic process	GO:0006511	1.59497	8	0.0241819	up
	Gene Ontology	modification-dependent protein catabolic process	GO:0019941	1.62792	8	0.0241819	up
	Gene Ontology	modification-dependent macromolecule catabolic process	GO:0043632	1.62792	8	0.0241819	up
	Gene Ontology	protein catabolic process	GO:0030163	2.12223	9	0.024788	up
	Gene Ontology	catabolic process	GO:0009056	6.12283	16	0.0257149	up
	Gene Ontology	retrograde protein transport, ER to cytosol	GO:0030970	0.0329539	2	0.0288266	up
	Gene Ontology	cellular catabolic process	GO:0044248	5.01558	14	0.0288266	up
	Gene Ontology	cellular protein catabolic process	GO:0044257	1.86519	8	0.0301435	up
	Gene Ontology	proteolysis involved in cellular protein catabolic process	GO:0051603	1.8586	8	0.0301435	up
	Gene Ontology	S-acyltransferase activity	GO:0016417	0.0395446	2	0.0326128	up
	Gene Ontology	locomotion	GO:0040011	2.94608	10	0.0326128	up
	Gene Ontology	coenzyme biosynthetic process	GO:0009108	0.408628	4	0.0330688	up
	Gene Ontology	cellular component movement	GO:0006928	3.02516	10	0.0336392	up
	Gene Ontology	ubiquitin binding	GO:0043130	0.191132	3	0.0336392	up
	Gene Ontology	small molecule metabolic process	GO:0044281	8.12642	18	0.0336392	up
	Gene Ontology	negative regulation of protein ubiquitination	GO:0031397	0.448173	4	0.035144	up
	Gene Ontology	small conjugating protein binding	GO:0032182	0.197723	3	0.035144	up
	Gene Ontology	monocarboxylic acid metabolic process	GO:0032787	1.63451	7	0.0393138	up
	Gene Ontology	oxidoreductase activity, acting on the CH-OH group of donors, NAD or NADP as acceptor	GO:0016616	0.481126	4	0.0416534	up
	Gene Ontology	cell migration	GO:0016477	2.19473	8	0.0450958	up
	Gene Ontology	coenzyme metabolic process	GO:0006732	0.869982	5	0.0499159	up
miR-146a (136/132)	Gene Ontology	protein kinase inhibitor activity	GO:0004860	0.318411	4	0.0397888	up
	Gene Ontology	negative regulation of protein kinase activity	GO:0006469	0.817256	6	0.0397888	up
	Gene Ontology	oxidoreductase activity, acting on single donors with incorporation of molecular oxygen	GO:0016701	0.583754	5	0.0397888	up
	Gene Ontology	oxidoreductase activity, acting on single donors with incorporation of molecular oxygen, incorporation of two atoms of oxygen	GO:0016702	0.583754	5	0.0397888	up
	Gene Ontology	kinase inhibitor activity	GO:0019210	0.329025	4	0.0397888	up
	Gene Ontology	negative regulation of kinase activity	GO:0033673	0.859711	6	0.0397888	up
	Gene Ontology	dioxygenase activity	GO:0051213	0.583754	5	0.0397888	up
	Gene Ontology	negative regulation of transferase activity	GO:0051348	0.923393	6	0.0397888	up
miR-150 (10)	KEGG	Chagas disease	5142	0.117188	2	0.00518681	up
	KEGG	T cell receptor signaling pathway	4660	0.1118	2	0.00518681	up
	Gene Ontology	alpha-beta T cell receptor complex	GO:0042105	0.00171189	2	5.20952e-05	up
	Gene Ontology	T cell receptor complex	GO:0042101	0.0077035	2	0.00093472	up
	Gene Ontology	plasma membrane part	GO:0044459	1.12214	6	0.00731587	up
	Gene Ontology	plasma membrane	GO:0005886	1.95155	7	0.0145128	up
	Gene Ontology	transmembrane receptor activity	GO:0004888	0.522982	4	0.0167335	up
	Gene Ontology	signaling	GO:0023052	2.12702	7	0.0167335	up
	Gene Ontology	receptor complex	GO:0043235	0.0710434	2	0.0244058	up
	Gene Ontology	receptor activity	GO:0004872	0.766926	4	0.0489706	up
miR-155 (1583/1559)	KEGG	Olfactory transduction	4740	18.7042	3	0.000436245	down
	KEGG	Jak-STAT signaling pathway	4630	16.4197	30	0.0439918	up
	KEGG	Phagosome	4145	16.1342	29	0.048356	up
	Gene Ontology	immune response	GO:0006955	67.1857	116	4.19294e-06	up
	Gene Ontology	immune system process	GO:0002376	103.441	161	4.24092e-06	up
	Gene Ontology	T cell proliferation	GO:0042098	9.12711	25	0.00149781	up
	Gene Ontology	innate immune response	GO:0045087	20.0289	42	0.00149781	up
	Gene Ontology	leukocyte activation	GO:0045321	34.3534	62	0.00149781	up
	Gene Ontology	lymphocyte activation	GO:0046649	28.1419	53	0.00182029	up
	Gene Ontology	cell activation	GO:0001775	38.917	67	0.00185856	up
	Gene Ontology	positive regulation of immune system process	GO:0002684	26.2404	50	0.00185856	up
	Gene Ontology	defense response	GO:0006952	64.0165	99	0.00185856	up
	Gene Ontology	positive regulation of T cell proliferation	GO:0042102	4.31002	15	0.00185856	up
	Gene Ontology	regulation of lymphocyte proliferation	GO:0050670	8.62005	23	0.00185856	up
	Gene Ontology	regulation of immune response	GO:0050776	24.4657	47	0.00185856	up
	Gene Ontology	regulation of mononuclear cell proliferation	GO:0032944	8.74681	23	0.00194631	up
	Gene Ontology	regulation of T cell proliferation	GO:0042129	6.46503	19	0.00194631	up
	Gene Ontology	regulation of leukocyte proliferation	GO:0070663	8.87358	23	0.00238464	up
	Gene Ontology	sensory perception of smell	GO:0007608	15.4654	2	0.00259154	down
	Gene Ontology	lymphocyte proliferation	GO:0046651	12.1695	28	0.00303519	up
	Gene Ontology	positive regulation of immune response	GO:0050778	15.4654	33	0.00303519	up
	Gene Ontology	positive regulation of lymphocyte proliferation	GO:0050671	6.2115	18	0.00312064	up
	Gene Ontology	cellular process	GO:0009987	1040.36	1108	0.0032581	up
	Gene Ontology	intracellular signaling pathway	GO:0023034	143.879	190	0.0032581	up
	Gene Ontology	mononuclear cell proliferation	GO:0032943	12.423	28	0.003555	up
	Gene Ontology	positive regulation of mononuclear cell proliferation	GO:0032946	6.33827	18	0.003555	up
	Gene Ontology	regulation of immune system process	GO:0002682	41.579	68	0.00359967	up
	Gene Ontology	leukocyte proliferation	GO:0070661	12.5498	28	0.00395706	up
	Gene Ontology	positive regulation of leukocyte proliferation	GO:0070665	6.46503	18	0.00428971	up
	Gene Ontology	signal transduction	GO:0007165	204.853	256	0.00500023	up
	Gene Ontology	regulation of leukocyte activation	GO:0002694	17.6204	35	0.0055382	up
	Gene Ontology	cytoplasmic part	GO:0044444	492.23	560	0.0055382	up
	Gene Ontology	cytokine production	GO:0001816	22.691	42	0.00584453	up
	Gene Ontology	2-oxoglutarate metabolic process	GO:0006103	1.64795	8	0.00584453	up
	Gene Ontology	sensory perception of chemical stimulus	GO:0007606	17.4936	4	0.00675492	down
	Gene Ontology	nucleic acid binding	GO:0003676	290.039	236	0.00759628	down
	Gene Ontology	regulation of cytokine production	GO:0001817	20.9163	39	0.00769061	up
	Gene Ontology	positive regulation of cytokine biosynthetic process	GO:0042108	5.70444	16	0.00769061	up
	Gene Ontology	T cell activation	GO:0042110	20.1557	38	0.00769061	up
	Gene Ontology	cognition	GO:0050890	54.5091	30	0.00769061	down
	Gene Ontology	organelle membrane	GO:0031090	181.021	227	0.00862558	up
	Gene Ontology	adaptive immune response based on somatic recombination of immune receptors built from immunoglobulin superfamily domains	GO:0002460	12.0427	26	0.00894992	up
	Gene Ontology	cytokine biosynthetic process	GO:0042089	8.87358	21	0.00980865	up
	Gene Ontology	regulation of lymphocyte activation	GO:0051249	15.5921	31	0.0103508	up
	Gene Ontology	positive regulation of leukocyte activation	GO:0002696	11.5357	25	0.0104427	up
	Gene Ontology	neurological system process	GO:0050877	81.1298	52	0.0104427	down
	Gene Ontology	inflammatory response	GO:0006954	36.6352	59	0.0105359	up
	Gene Ontology	cytokine metabolic process	GO:0042107	9.00034	21	0.0109227	up
	Gene Ontology	adaptive immune response	GO:0002250	12.2962	26	0.0110445	up
	Gene Ontology	response to wounding	GO:0009611	58.0585	85	0.0128413	up
	Gene Ontology	regulation of cell activation	GO:0050865	18.7613	35	0.0130538	up
	Gene Ontology	regulation of adaptive immune response based on somatic recombination of immune receptors built from immunoglobulin superfamily domains	GO:0002822	5.57768	15	0.0157779	up
	Gene Ontology	intracellular signal transduction	GO:0035556	112.694	148	0.0157779	up
	Gene Ontology	positive regulation of cell activation	GO:0050867	11.9159	25	0.0157779	up
	Gene Ontology	system process	GO:0003008	109.145	77	0.0164951	down
	Gene Ontology	sensory perception	GO:0007600	45.8891	25	0.0164951	down
	Gene Ontology	dicarboxylic acid metabolic process	GO:0043648	3.92973	12	0.0164951	up
	Gene Ontology	cytoplasm	GO:0005737	718.887	782	0.016907	up
	Gene Ontology	response to peptidoglycan	GO:0032494	1.14089	6	0.016907	up
	Gene Ontology	regulation of cytokine biosynthetic process	GO:0042035	8.11298	19	0.016907	up
	Gene Ontology	regulation of adaptive immune response	GO:0002819	5.70444	15	0.0182699	up
	Gene Ontology	apoptosis	GO:0006915	110.032	144	0.019263	up
	Gene Ontology	programmed cell death	GO:0012501	110.92	145	0.019263	up
	Gene Ontology	membrane	GO:0016020	595.163	656	0.0204636	up
	Gene Ontology	alpha-beta T cell activation	GO:0046631	5.19738	14	0.0204636	up
	Gene Ontology	cell death	GO:0008219	122.075	157	0.0225523	up
	Gene Ontology	positive regulation of adaptive immune response based on somatic recombination of immune receptors built from immunoglobulin superfamily domains	GO:0002824	3.04237	10	0.0228946	up
	Gene Ontology	purine nucleoside triphosphate metabolic process	GO:0009144	24.0854	41	0.0229721	up
	Gene Ontology	response to stress	GO:0006950	174.683	215	0.0230408	up
	Gene Ontology	death	GO:0016265	122.329	157	0.0230408	up
	Gene Ontology	regulation of T cell activation	GO:0050863	12.423	25	0.0230408	up
	Gene Ontology	nucleoside triphosphate metabolic process	GO:0009141	24.9728	42	0.0241567	up
	Gene Ontology	leukotriene biosynthetic process	GO:0019370	1.64795	7	0.0242444	up
	Gene Ontology	alkene biosynthetic process	GO:0043450	1.64795	7	0.0242444	up
	Gene Ontology	biological regulation	GO:0065007	625.46	685	0.024765	up
	Gene Ontology	leukocyte differentiation	GO:0002521	19.7754	35	0.0250144	up
	Gene Ontology	ribonucleoside triphosphate metabolic process	GO:0009199	23.5784	40	0.0250689	up
	Gene Ontology	purine ribonucleoside triphosphate metabolic process	GO:0009205	23.5784	40	0.0250689	up
	Gene Ontology	positive regulation of lymphocyte activation	GO:0051251	10.5215	22	0.0253652	up
	Gene Ontology	immune system development	GO:0002520	36.2549	56	0.0255255	up
	Gene Ontology	positive regulation of adaptive immune response	GO:0002821	3.16913	10	0.0255255	up
	Gene Ontology	cell	GO:0005623	1286.67	1326	0.0255255	up
	Gene Ontology	glycolipid biosynthetic process	GO:0009247	1.26765	6	0.0255255	up
	Gene Ontology	signaling process	GO:0023046	232.107	276	0.0255255	up
	Gene Ontology	positive regulation of apoptosis	GO:0043065	46.9032	69	0.0255255	up
	Gene Ontology	cell part	GO:0044464	1286.67	1326	0.0255255	up
	Gene Ontology	regulation of interleukin-6 biosynthetic process	GO:0045408	1.26765	6	0.0255255	up
	Gene Ontology	hemopoietic or lymphoid organ development	GO:0048534	33.8464	53	0.0255255	up
	Gene Ontology	signaling	GO:0023052	315.012	364	0.0260017	up
	Gene Ontology	signal transmission	GO:0023060	231.474	275	0.0270897	up
	Gene Ontology	positive regulation of programmed cell death	GO:0043068	47.2835	69	0.0304804	up
	Gene Ontology	signaling pathway	GO:0023033	227.797	270	0.0339553	up
	Gene Ontology	regulation of defense response	GO:0031347	15.8457	29	0.0339553	up
	Gene Ontology	regulation of biological process	GO:0050789	594.53	651	0.0339553	up
	Gene Ontology	regulation of interleukin-6 production	GO:0032675	4.43679	12	0.0349729	up
	Gene Ontology	regulation of immune effector process	GO:0002697	10.9018	22	0.0349932	up
	Gene Ontology	DNA replication	GO:0006260	23.3248	10	0.0353959	down
	Gene Ontology	positive regulation of defense response	GO:0031349	8.87358	19	0.0353959	up
	Gene Ontology	T-helper 1 type immune response	GO:0042088	2.28178	8	0.0356106	up
	Gene Ontology	heterocycle metabolic process	GO:0046483	52.7344	75	0.0356106	up
	Gene Ontology	positive regulation of T cell activation	GO:0050870	8.23975	18	0.035644	up
	Gene Ontology	positive regulation of cell death	GO:0010942	47.7906	69	0.0365168	up
	Gene Ontology	RNA binding	GO:0003723	71.3689	48	0.0370024	down
	Gene Ontology	ribonucleotide metabolic process	GO:0009259	26.7475	43	0.0379018	up
	Gene Ontology	positive regulation of innate immune response	GO:0045089	5.19738	13	0.0442692	up
	Gene Ontology	regulation of T cell differentiation	GO:0045580	5.19738	13	0.0442692	up
	Gene Ontology	germinal center formation	GO:0002467	1.01412	5	0.0449508	up
	Gene Ontology	indolalkylamine metabolic process	GO:0006586	1.01412	5	0.0449508	up
	Gene Ontology	leukotriene metabolic process	GO:0006691	1.90148	7	0.0449508	up
	Gene Ontology	purine ribonucleotide metabolic process	GO:0009150	25.4798	41	0.0449508	up
	Gene Ontology	indole and derivative metabolic process	GO:0042430	1.01412	5	0.0449508	up
	Gene Ontology	indole derivative metabolic process	GO:0042434	1.01412	5	0.0449508	up
	Gene Ontology	superoxide anion generation	GO:0042554	1.01412	5	0.0449508	up
	Gene Ontology	cellular alkene metabolic process	GO:0043449	1.90148	7	0.0449508	up
	Gene Ontology	regulation of innate immune response	GO:0045088	5.83121	14	0.0449508	up
	Gene Ontology	positive regulation of biological process	GO:0048518	209.923	249	0.0449508	up
	Gene Ontology	regulation of cellular process	GO:0050794	565.627	619	0.0449508	up
	Gene Ontology	interleukin-6 production	GO:0032635	4.69032	12	0.0487786	up
	Gene Ontology	cilium	GO:0005929	11.9159	3	0.0490651	down
	Gene Ontology	magnesium ion binding	GO:0000287	15.7189	28	0.0497216	up
miR-186 (458/453)	Gene Ontology	immune system process	GO:0002376	30.1032	60	0.000335454	up
	Gene Ontology	immune response	GO:0006955	19.5523	43	0.000860195	up
	Gene Ontology	mitochondrion	GO:0005739	36.4854	63	0.00707513	up
	Gene Ontology	cellular macromolecule biosynthetic process	GO:0034645	94.4784	61	0.00802903	down
	Gene Ontology	innate immune response	GO:0045087	5.82881	18	0.00802903	up
	Gene Ontology	positive regulation of T-helper cell differentiation	GO:0045624	0.258238	4	0.0142707	up
	Gene Ontology	positive regulation of alpha-beta T cell activation	GO:0046635	0.737824	6	0.0142707	up
	Gene Ontology	positive regulation of alpha-beta T cell proliferation	GO:0046641	0.258238	4	0.0142707	up
	Gene Ontology	defense response	GO:0006952	18.6301	36	0.0196014	up
	Gene Ontology	hydrolase activity, acting on carbon-nitrogen (but not peptide) bonds, in cyclic amidines	GO:0016814	0.811607	6	0.0196014	up
	Gene Ontology	multi-organism process	GO:0051704	21.5445	40	0.0196014	up
	Gene Ontology	regulation of immune system process	GO:0002682	12.1003	26	0.0218113	up
	Gene Ontology	nucleic acid binding	GO:0003676	84.4071	56	0.0218113	down
	Gene Ontology	macromolecule biosynthetic process	GO:0009059	96.4336	67	0.0218113	down
	Gene Ontology	positive regulation of T cell proliferation	GO:0042102	1.2543	7	0.0218113	up
	Gene Ontology	positive regulation of CD4-positive, alpha beta T cell differentiation	GO:0043372	0.332021	4	0.0218113	up
	Gene Ontology	lymphocyte activation	GO:0046649	8.18985	20	0.0218113	up
	Gene Ontology	regulation of lymphocyte activation	GO:0051249	4.53762	14	0.0218113	up
	Gene Ontology	cellular macromolecule metabolic process	GO:0044260	154.021	120	0.0234942	down
	Gene Ontology	regulation of T cell activation	GO:0050863	3.61534	12	0.0234942	up
	Gene Ontology	T cell proliferation	GO:0042098	2.65617	10	0.0248434	up
	Gene Ontology	positive regulation of alpha-beta T cell differentiation	GO:0046638	0.627151	5	0.0248434	up
	Gene Ontology	mitochondrial proton-transporting ATP synthase complex, coupling factor F(o)	GO:0000276	0.184456	3	0.026511	up
	Gene Ontology	regulation of nucleobase, nucleoside, nucleotide and nucleic acid metabolic process	GO:0019219	78.7627	53	0.026511	down
	Gene Ontology	positive regulation of mononuclear cell proliferation	GO:0032946	1.84456	8	0.026511	up
	Gene Ontology	response to cytokine stimulus	GO:0034097	3.24643	11	0.026511	up
	Gene Ontology	T-helper 1 type immune response	GO:0042088	0.664042	5	0.026511	up
	Gene Ontology	regulation of T cell proliferation	GO:0042129	1.88145	8	0.026511	up
	Gene Ontology	macromolecule metabolic process	GO:0043170	167.486	134	0.026511	down
	Gene Ontology	negative regulation of viral genome replication	GO:0045071	0.184456	3	0.026511	up
	Gene Ontology	regulation of T-helper cell differentiation	GO:0045622	0.405803	4	0.026511	up
	Gene Ontology	regulation of alpha-beta T cell activation	GO:0046634	1.03295	6	0.026511	up
	Gene Ontology	regulation of alpha-beta T cell proliferation	GO:0046640	0.405803	4	0.026511	up
	Gene Ontology	positive regulation of lymphocyte proliferation	GO:0050671	1.80767	8	0.026511	up
	Gene Ontology	regulation of nitrogen compound metabolic process	GO:0051171	79.5374	54	0.026511	down
	Gene Ontology	positive regulation of leukocyte proliferation	GO:0070665	1.88145	8	0.026511	up
	Gene Ontology	gene expression	GO:0010467	102.89	75	0.0278987	down
	Gene Ontology	regulation of RNA metabolic process	GO:0051252	46.9256	27	0.0278987	down
	Gene Ontology	nucleic acid metabolic process	GO:0090304	99.5325	72	0.0278987	down
	Gene Ontology	positive regulation of T cell activation	GO:0050870	2.39793	9	0.0279397	up
	Gene Ontology	regulation of leukocyte activation	GO:0002694	5.12788	14	0.0280189	up
	Gene Ontology	antigen processing and presentation of peptide antigen	GO:0048002	0.737824	5	0.0292641	up
	Gene Ontology	regulation of transcription, DNA-dependent	GO:0006355	45.7451	27	0.0322232	down
	Gene Ontology	response to virus	GO:0009615	4.75897	13	0.0322232	up
	Gene Ontology	leukotriene biosynthetic process	GO:0019370	0.479586	4	0.0322232	up
	Gene Ontology	mononuclear cell proliferation	GO:0032943	3.61534	11	0.0322232	up
	Gene Ontology	regulation of mononuclear cell proliferation	GO:0032944	2.54549	9	0.0322232	up
	Gene Ontology	cytokine biosynthetic process	GO:0042089	2.58238	9	0.0322232	up
	Gene Ontology	regulation of CD4-positive, alpha beta T cell differentiation	GO:0043370	0.479586	4	0.0322232	up
	Gene Ontology	alkene biosynthetic process	GO:0043450	0.479586	4	0.0322232	up
	Gene Ontology	cytoplasmic part	GO:0044444	143.249	174	0.0322232	up
	Gene Ontology	regulation of transcription	GO:0045449	68.9128	46	0.0322232	down
	Gene Ontology	regulation of T-helper 1 cell differentiation	GO:0045625	0.221347	3	0.0322232	up
	Gene Ontology	regulation of alpha-beta T cell differentiation	GO:0046637	0.774715	5	0.0322232	up
	Gene Ontology	lymphocyte proliferation	GO:0046651	3.54156	11	0.0322232	up
	Gene Ontology	negative regulation of viral reproduction	GO:0048525	0.221347	3	0.0322232	up
	Gene Ontology	regulation of lymphocyte proliferation	GO:0050670	2.5086	9	0.0322232	up
	Gene Ontology	positive regulation of lymphocyte activation	GO:0051251	3.06197	10	0.0322232	up
	Gene Ontology	leukocyte proliferation	GO:0070661	3.65223	11	0.0322232	up
	Gene Ontology	regulation of leukocyte proliferation	GO:0070663	2.58238	9	0.0322232	up
	Gene Ontology	cytokine metabolic process	GO:0042107	2.61928	9	0.0345665	up
	Gene Ontology	regulation of cell activation	GO:0050865	5.4599	14	0.0345665	up
	Gene Ontology	fumarate metabolic process	GO:0006106	0.0737824	2	0.0350679	up
	Gene Ontology	transcription, RNA-dependent	GO:0006410	0.0737824	2	0.0350679	up
	Gene Ontology	peptide antigen-transporting ATPase activity	GO:0015433	0.0737824	2	0.0350679	up
	Gene Ontology	response to interferon-gamma	GO:0034341	0.516477	4	0.0350679	up
	Gene Ontology	MHC class I peptide loading complex	GO:0042824	0.0737824	2	0.0350679	up
	Gene Ontology	TAP complex	GO:0042825	0.0737824	2	0.0350679	up
	Gene Ontology	negative regulation of retroviral genome replication	GO:0045869	0.0737824	2	0.0350679	up
	Gene Ontology	alpha-beta T cell proliferation	GO:0046633	0.516477	4	0.0350679	up
	Gene Ontology	TAP binding	GO:0046977	0.0737824	2	0.0350679	up
	Gene Ontology	TAP1 binding	GO:0046978	0.0737824	2	0.0350679	up
	Gene Ontology	arachidonate 15-lipoxygenase activity	GO:0050473	0.0737824	2	0.0350679	up
	Gene Ontology	response to other organism	GO:0051707	9.55482	20	0.03765	up
	Gene Ontology	regulation of gene expression	GO:0010468	77.8405	55	0.038638	down
	Gene Ontology	T-helper 1 cell differentiation	GO:0045063	0.258238	3	0.038638	up
	Gene Ontology	icosanoid biosynthetic process	GO:0046456	0.885389	5	0.0387466	up
	Gene Ontology	regulation of biosynthetic process	GO:0009889	79.9433	57	0.0402443	down
	Gene Ontology	CD4-positive, alpha-beta T cell differentiation involved in immune response	GO:0002294	0.553368	4	0.0406505	up
	Gene Ontology	leukocyte differentiation	GO:0002521	5.75503	14	0.0406505	up
	Gene Ontology	positive regulation of leukocyte activation	GO:0002696	3.3571	10	0.0406505	up
	Gene Ontology	DNA binding	GO:0003677	58.9153	39	0.0406505	down
	Gene Ontology	leukotriene metabolic process	GO:0006691	0.553368	4	0.0406505	up
	Gene Ontology	regulation of macromolecule biosynthetic process	GO:0010556	76.1803	54	0.0406505	down
	Gene Ontology	regulation of interleukin-2 production	GO:0032663	0.92228	5	0.0406505	up
	Gene Ontology	T-helper cell differentiation	GO:0042093	0.553368	4	0.0406505	up
	Gene Ontology	cellular alkene metabolic process	GO:0043449	0.553368	4	0.0406505	up
	Gene Ontology	positive regulation of T cell differentiation	GO:0045582	0.92228	5	0.0406505	up
	Gene Ontology	positive regulation of lymphocyte differentiation	GO:0045621	0.92228	5	0.0406505	up
	Gene Ontology	regulation of cellular biosynthetic process	GO:0031326	79.4637	57	0.0419967	down
	Gene Ontology	regulation of immune response	GO:0050776	7.12	16	0.0434741	up
	Gene Ontology	cell activation	GO:0001775	11.3256	22	0.0443391	up
	Gene Ontology	alpha-beta T cell activation involved in immune response	GO:0002287	0.590259	4	0.0443391	up
	Gene Ontology	T cell differentiation involved in immune response	GO:0002292	0.590259	4	0.0443391	up
	Gene Ontology	alpha-beta T cell differentiation involved in immune response	GO:0002293	0.590259	4	0.0443391	up
	Gene Ontology	transaminase activity	GO:0008483	0.590259	4	0.0443391	up
	Gene Ontology	hydrolase activity, acting on carbon-nitrogen (but not peptide) bonds	GO:0016810	2.87751	9	0.0443391	up
	Gene Ontology	regulation of cytokine biosynthetic process	GO:0042035	2.36104	8	0.0443391	up
	Gene Ontology	T cell activation	GO:0042110	5.8657	14	0.0443391	up
	Gene Ontology	regulation of T-helper 1 type immune response	GO:0002825	0.29513	3	0.044368	up
	Gene Ontology	organelle envelope	GO:0031967	18.8514	32	0.044368	up
	Gene Ontology	peptide antigen binding	GO:0042605	0.29513	3	0.044368	up
	Gene Ontology	positive regulation of cell activation	GO:0050867	3.46777	10	0.044368	up
	Gene Ontology	RNA biosynthetic process	GO:0032774	49.9138	32	0.0452919	down
	Gene Ontology	leukocyte activation	GO:0045321	9.99752	20	0.0452919	up
	Gene Ontology	transcription	GO:0006350	71.9379	51	0.0464989	down
	Gene Ontology	transcription, DNA-dependent	GO:0006351	49.8031	32	0.0464989	down
	Gene Ontology	lymphocyte activation involved in immune response	GO:0002285	0.996063	5	0.0466128	up
	Gene Ontology	mitochondrial inner membrane	GO:0005743	7.9685	17	0.0466128	up
	Gene Ontology	unsaturated fatty acid biosynthetic process	GO:0006636	0.996063	5	0.0466128	up
	Gene Ontology	regulation of primary metabolic process	GO:0080090	94.2939	71	0.0466128	down
	Gene Ontology	mitochondrial membrane	GO:0031966	11.5469	22	0.0484944	up
	Gene Ontology	envelope	GO:0031975	19.1096	32	0.0492854	up
	Gene Ontology	mitochondrial envelope	GO:0005740	12.3217	23	0.0499849	up
miR-197 (16)	KEGG	Antigen processing and presentation	4612	0.112069	2	0.0241858	up
	KEGG	GnRH signaling pathway	4912	0.155172	2	0.0241858	up
	KEGG	Vascular smooth muscle contraction	4270	0.174569	2	0.0241858	up
	KEGG	Calcium signaling pathway	4020	0.230603	2	0.0246929	up
	KEGG	Neurotrophin signaling pathway	4722	0.221983	2	0.0246929	up
	Gene Ontology	nitric oxide biosynthetic process	GO:0006809	0.040743	2	0.04344	up
	Gene Ontology	cellular nitrogen compound biosynthetic process	GO:0044271	0.39305	4	0.04344	up
	Gene Ontology	nitric oxide metabolic process	GO:0046209	0.0419413	2	0.04344	up
	Gene Ontology	regulation of proteasomal protein catabolic process	GO:0061136	0.0359497	2	0.04344	up
miR-212 (209/207)	KEGG	Fatty acid metabolism	71	0.64736	5	0.0248615	up
	KEGG	Valine, leucine and isoleucine degradation	280	0.863147	5	0.048975	up
	Gene Ontology	monocarboxylic acid metabolic process	GO:0032787	4.24548	16	0.00676201	up
	Gene Ontology	proteasome complex	GO:0000502	0.890182	7	0.0167005	up
	Gene Ontology	nucleic acid binding	GO:0003676	39.168	21	0.0410977	down
	Gene Ontology	carboxypeptidase activity	GO:0004180	0.359497	4	0.0410977	up
	Gene Ontology	organic acid metabolic process	GO:0006082	7.32689	18	0.0410977	up
	Gene Ontology	lipid metabolic process	GO:0006629	11.2129	25	0.0410977	up
	Gene Ontology	cellular component movement	GO:0006928	7.85757	19	0.0410977	up
	Gene Ontology	immune response	GO:0006955	9.07301	21	0.0410977	up
	Gene Ontology	S-acetyltransferase activity	GO:0016418	0.0342378	2	0.0410977	up
	Gene Ontology	carboxylic acid metabolic process	GO:0019752	7.25841	18	0.0410977	up
	Gene Ontology	oxoacid metabolic process	GO:0043436	7.25841	18	0.0410977	up
	Gene Ontology	small molecule metabolic process	GO:0044281	21.1076	39	0.0410977	up
	Gene Ontology	proteolysis	GO:0006508	9.43251	21	0.0438914	up
	Gene Ontology	cellular ketone metabolic process	GO:0042180	7.46384	18	0.0438914	up
	Gene Ontology	cellular catabolic process	GO:0044248	13.0275	26	0.0463662	up
	Gene Ontology	cell migration	GO:0016477	5.70059	15	0.0468484	up
miR-222 (383/377)	Gene Ontology	innate immune response	GO:0045087	4.80099	19	0.000499712	up
	Gene Ontology	immune response	GO:0006955	16.1046	36	0.00405389	up
	Gene Ontology	defense response	GO:0006952	15.3449	34	0.00605849	up
	Gene Ontology	immune system process	GO:0002376	24.795	46	0.0132145	up
	Gene Ontology	multi-organism process	GO:0051704	17.7454	36	0.0133651	up
miR-361-5p (103/102)	Gene Ontology	positive regulation of defense response to virus by host	GO:0002230	0.033553	3	0.00147467	up
	Gene Ontology	response to biotic stimulus	GO:0009607	2.75974	12	0.00203455	up
	Gene Ontology	response to virus	GO:0009615	1.08209	8	0.00203455	up
	Gene Ontology	regulation of defense response to virus	GO:0050688	0.159377	4	0.00203455	up
	Gene Ontology	defense response to virus	GO:0051607	0.327142	5	0.00203455	up
	Gene Ontology	response to other organism	GO:0051707	2.17256	11	0.00203455	up
	Gene Ontology	regulation of defense response to virus by host	GO:0050691	0.0671061	3	0.00287809	up
	Gene Ontology	transcription, RNA-dependent	GO:0006410	0.0167765	2	0.00501486	up
	Gene Ontology	negative regulation of retroviral genome replication	GO:0045869	0.0167765	2	0.00501486	up
	Gene Ontology	regulation of response to biotic stimulus	GO:0002831	0.260036	4	0.00797727	up
	Gene Ontology	positive regulation of ligase activity	GO:0051351	0.520072	5	0.00978621	up
	Gene Ontology	proteasome activator complex	GO:0008537	0.0251648	2	0.0103584	up
	Gene Ontology	apolipoprotein B mRNA editing enzyme complex	GO:0030895	0.0251648	2	0.0103584	up
	Gene Ontology	cytidine deaminase activity	GO:0004126	0.033553	2	0.0133922	up
	Gene Ontology	defense response	GO:0006952	4.23607	13	0.0133922	up
	Gene Ontology	base conversion or substitution editing	GO:0016553	0.033553	2	0.0133922	up
	Gene Ontology	innate immune response	GO:0045087	1.32534	7	0.0133922	up
	Gene Ontology	regulation of retroviral genome replication	GO:0045091	0.033553	2	0.0133922	up
	Gene Ontology	regulation of ligase activity	GO:0051340	0.603954	5	0.0133922	up
	Gene Ontology	multi-organism process	GO:0051704	4.89874	14	0.0133922	up
	Gene Ontology	immune response	GO:0006955	4.44578	13	0.0143422	up
	Gene Ontology	regulation of multi-organism process	GO:0043900	0.369083	4	0.0143922	up
	Gene Ontology	ribose phosphate diphosphokinase activity	GO:0004749	0.0419413	2	0.0184985	up
	Gene Ontology	negative regulation of viral genome replication	GO:0045071	0.0419413	2	0.0184985	up
	Gene Ontology	metal ion binding	GO:0046872	21.7843	36	0.0193883	up
	Gene Ontology	hydrolase activity, acting on carbon-nitrogen (but not peptide) bonds, in cyclic amidines	GO:0016814	0.184542	3	0.0195662	up
	Gene Ontology	diphosphotransferase activity	GO:0016778	0.0503295	2	0.0200697	up
	Gene Ontology	viral genome replication	GO:0019079	0.19293	3	0.0200697	up
	Gene Ontology	ion binding	GO:0043167	22.0947	36	0.0200697	up
	Gene Ontology	cation binding	GO:0043169	22.0443	36	0.0200697	up
	Gene Ontology	retroviral genome replication	GO:0045090	0.0503295	2	0.0200697	up
	Gene Ontology	negative regulation of viral reproduction	GO:0048525	0.0503295	2	0.0200697	up
	Gene Ontology	negative regulation of ubiquitin-protein ligase activity involved in mitotic cell cycle	GO:0051436	0.444578	4	0.0200697	up
	Gene Ontology	positive regulation of ubiquitin-protein ligase activity involved in mitotic cell cycle	GO:0051437	0.452966	4	0.0203501	up
	Gene Ontology	immune system process	GO:0002376	6.84482	16	0.021686	up
	Gene Ontology	negative regulation of ligase activity	GO:0051352	0.478131	4	0.0229136	up
	Gene Ontology	negative regulation of ubiquitin-protein ligase activity	GO:0051444	0.478131	4	0.0229136	up
	Gene Ontology	regulation of ubiquitin-protein ligase activity involved in mitotic cell cycle	GO:0051439	0.486519	4	0.0238108	up
	Gene Ontology	plasma membrane	GO:0005886	19.1252	8	0.0262865	down
	Gene Ontology	positive regulation of ubiquitin-protein ligase activity	GO:0051443	0.511684	4	0.0272952	up
	Gene Ontology	transition metal ion binding	GO:0046914	13.0857	24	0.0316905	up
	Gene Ontology	negative regulation of protein ubiquitination	GO:0031397	0.570401	4	0.0387962	up
	Gene Ontology	catalytic activity	GO:0003824	31.4224	45	0.0417475	up
	Gene Ontology	viral reproductive process	GO:0022415	0.595566	4	0.042384	up
	Gene Ontology	regulation of ubiquitin-protein ligase activity	GO:0051438	0.595566	4	0.042384	up
	Gene Ontology	negative regulation of cellular protein metabolic process	GO:0032269	1.45117	6	0.0465967	up
	Gene Ontology	proteasome accessory complex	GO:0022624	0.0922708	2	0.0472579	up
	Gene Ontology	positive regulation of histone modification	GO:0031058	0.0922708	2	0.0472579	up
	Gene Ontology	negative regulation of protein modification process	GO:0031400	1.02337	5	0.0472579	up
	Gene Ontology	regulation of viral genome replication	GO:0045069	0.0922708	2	0.0472579	up
	Gene Ontology	viral reproduction	GO:0016032	0.637507	4	0.0478343	up
	Gene Ontology	regulation of defense response	GO:0031347	1.04853	5	0.0495664	up
miR-371-5p (32/31)	KEGG	Metabolic pathways	1100	3.88416	9	0.0212795	up
miR-378 (231/226)	Gene Ontology	immune system process	GO:0002376	15.3659	37	0.000621796	up
	Gene Ontology	regulation of angiotensin levels in blood	GO:0002002	0.0564923	3	0.00319935	up
	Gene Ontology	immune response	GO:0006955	9.98031	26	0.00319935	up
	Gene Ontology	regulation of angiotensin metabolic process	GO:0060177	0.0753231	3	0.00860783	up
	Gene Ontology	regulation of systemic arterial blood pressure by circulatory renin-angiotensin	GO:0001991	0.0941539	3	0.0121257	up
	Gene Ontology	regulation of immune system process	GO:0002682	6.1765	18	0.0121257	up
	Gene Ontology	peptide catabolic process	GO:0043171	0.0941539	3	0.0121257	up
	Gene Ontology	cell activation	GO:0001775	5.78105	16	0.0217082	up
	Gene Ontology	leukocyte differentiation	GO:0002521	2.9376	11	0.0217082	up
	Gene Ontology	intracellular protein kinase cascade	GO:0007243	8.85047	21	0.0217082	up
	Gene Ontology	signal transmission via phosphorylation event	GO:0023014	8.85047	21	0.0217082	up
	Gene Ontology	T cell activation	GO:0042110	2.99409	11	0.0217082	up
	Gene Ontology	cellular amino acid derivative catabolic process	GO:0042219	0.301292	4	0.0217082	up
	Gene Ontology	leukocyte activation	GO:0045321	5.10314	15	0.0217082	up
	Gene Ontology	lymphocyte activation	GO:0046649	4.18043	13	0.0259444	up
	Gene Ontology	regulation of systemic arterial blood pressure by renin-angiotensin	GO:0003081	0.150646	3	0.025986	up
	Gene Ontology	phosphogluconate dehydrogenase (decarboxylating) activity	GO:0004616	0.0376616	2	0.025986	up
	Gene Ontology	indoleamine 2,3-dioxygenase activity	GO:0033754	0.0376616	2	0.025986	up
	Gene Ontology	adaptive immune response based on somatic recombination of immune receptors built from immunoglobulin superfamily domains	GO:0002460	1.78892	8	0.0274847	up
	Gene Ontology	T cell proliferation	GO:0042098	1.35582	7	0.0274847	up
	Gene Ontology	adaptive immune response	GO:0002250	1.82659	8	0.0301394	up
	Gene Ontology	mononuclear cell proliferation	GO:0032943	1.84542	8	0.0308282	up
	Gene Ontology	leukocyte proliferation	GO:0070661	1.86425	8	0.0315697	up
miR-421 (34/33)	KEGG	Toll-like receptor signaling pathway	4620	0.353448	4	0.00460557	up
	Gene Ontology	mitochondrial respiratory chain complex III	GO:0005750	0.0109561	2	0.00251455	up
	Gene Ontology	mitochondrial electron transport, ubiquinol to cytochrome c	GO:0006122	0.00547805	2	0.00251455	up
	Gene Ontology	ubiquinol-cytochrome-c reductase activity	GO:0008121	0.0109561	2	0.00251455	up
	Gene Ontology	response to wounding	GO:0009611	1.25447	8	0.00251455	up
	Gene Ontology	oxidoreductase activity, acting on diphenols and related substances as donors	GO:0016679	0.0109561	2	0.00251455	up
	Gene Ontology	oxidoreductase activity, acting on diphenols and related substances as donors, cytochrome as acceptor	GO:0016681	0.0109561	2	0.00251455	up
	Gene Ontology	respiratory chain complex III	GO:0045275	0.0109561	2	0.00251455	up
	Gene Ontology	regulation of T cell differentiation	GO:0045580	0.1123	3	0.00938588	up
	Gene Ontology	positive regulation of CD4-positive, alpha beta T cell differentiation	GO:0043372	0.0246512	2	0.0105936	up
	Gene Ontology	regulation of lymphocyte differentiation	GO:0045619	0.125995	3	0.0105936	up
	Gene Ontology	defense response	GO:0006952	1.38321	7	0.0130589	up
	Gene Ontology	hemopoiesis	GO:0030097	0.695712	5	0.018119	up
	Gene Ontology	regulation of CD4-positive, alpha beta T cell differentiation	GO:0043370	0.0356073	2	0.018119	up
	Gene Ontology	hemopoietic or lymphoid organ development	GO:0048534	0.731319	5	0.0210985	up
	Gene Ontology	leukocyte differentiation	GO:0002521	0.427288	4	0.0221939	up
	Gene Ontology	immune system development	GO:0002520	0.78336	5	0.0223258	up
	Gene Ontology	inflammatory response	GO:0006954	0.791578	5	0.0223258	up
	Gene Ontology	T cell differentiation	GO:0030217	0.205427	3	0.0223258	up
	Gene Ontology	CD4-positive, alpha beta T cell differentiation	GO:0043367	0.0493024	2	0.0223258	up
	Gene Ontology	positive regulation of alpha-beta T cell differentiation	GO:0046638	0.0465634	2	0.0223258	up
	Gene Ontology	positive regulation of alpha-beta T cell activation	GO:0046635	0.0547805	2	0.0258257	up
	Gene Ontology	regulation of alpha-beta T cell differentiation	GO:0046637	0.0575195	2	0.0272002	up
	Gene Ontology	regulation of immune system process	GO:0002682	0.898399	5	0.0308141	up
	Gene Ontology	positive regulation of cell differentiation	GO:0045597	0.525892	4	0.0308141	up
	Gene Ontology	regulation of interleukin-2 production	GO:0032663	0.0684756	2	0.0314459	up
	Gene Ontology	positive regulation of T cell differentiation	GO:0045582	0.0684756	2	0.0314459	up
	Gene Ontology	positive regulation of lymphocyte differentiation	GO:0045621	0.0684756	2	0.0314459	up
	Gene Ontology	aerobic respiration	GO:0009060	0.0766926	2	0.033748	up
	Gene Ontology	lymphocyte differentiation	GO:0030098	0.27938	3	0.033748	up
	Gene Ontology	interleukin-2 production	GO:0032623	0.0766926	2	0.033748	up
	Gene Ontology	regulation of alpha-beta T cell activation	GO:0046634	0.0766926	2	0.033748	up
	Gene Ontology	regulation of T cell activation	GO:0050863	0.268424	3	0.033748	up
	Gene Ontology	response to stress	GO:0006950	3.77437	10	0.0345979	up
	Gene Ontology	fat-soluble vitamin metabolic process	GO:0006775	0.0849097	2	0.0383118	up
	Gene Ontology	alpha-beta T cell differentiation	GO:0046632	0.0876487	2	0.0396306	up
	Gene Ontology	regulation of multicellular organismal process	GO:0051239	2.0707	7	0.0420587	up
	Gene Ontology	PML body	GO:0016605	0.101344	2	0.0461667	up
	Gene Ontology	ATP synthesis coupled electron transport	GO:0042773	0.101344	2	0.0461667	up
	Gene Ontology	mitochondrial ATP synthesis coupled electron transport	GO:0042775	0.101344	2	0.0461667	up
	Gene Ontology	regulation of lymphocyte activation	GO:0051249	0.3369	3	0.0461667	up
	Gene Ontology	regulation of developmental process	GO:0050793	1.61328	6	0.0466317	up
	Gene Ontology	response to virus	GO:0009615	0.353334	3	0.0486301	up
	Gene Ontology	regulation of cell differentiation	GO:0045595	1.13943	5	0.0486301	up
	Gene Ontology	positive regulation of developmental process	GO:0051094	0.714885	4	0.049255	up
miR-505 (297/292)	Gene Ontology	nucleus	GO:0005634	91.892	56	0.000758535	down
	Gene Ontology	cellular macromolecule metabolic process	GO:0044260	100.775	63	0.000758535	down
	Gene Ontology	nucleic acid binding	GO:0003676	55.2269	27	0.00130734	down
	Gene Ontology	macromolecule metabolic process	GO:0043170	109.585	74	0.0015367	down
	Gene Ontology	immune system process	GO:0002376	19.6963	41	0.00156759	up
	Gene Ontology	lymphocyte activation	GO:0046649	5.35856	18	0.00166987	up
	Gene Ontology	immune response	GO:0006955	12.7929	29	0.00505682	up
	Gene Ontology	integral to membrane	GO:0016021	77.8439	109	0.00505682	up
	Gene Ontology	nucleic acid metabolic process	GO:0090304	65.1233	38	0.00505682	down
	Gene Ontology	T cell proliferation	GO:0042098	1.73791	9	0.0077507	up
	Gene Ontology	membrane part	GO:0044425	92.9299	124	0.00784449	up
	Gene Ontology	intrinsic to membrane	GO:0031224	79.2197	109	0.00791668	up
	Gene Ontology	membrane	GO:0016020	113.326	145	0.00796319	up
	Gene Ontology	leukocyte activation	GO:0045321	6.5413	18	0.0097299	up
	Gene Ontology	lymphocyte proliferation	GO:0046651	2.31721	10	0.0097299	up
	Gene Ontology	regulation of immune system process	GO:0002682	7.91714	20	0.0101119	up
	Gene Ontology	mononuclear cell proliferation	GO:0032943	2.36549	10	0.0101119	up
	Gene Ontology	T cell activation	GO:0042110	3.83788	13	0.0101119	up
	Gene Ontology	leukocyte proliferation	GO:0070661	2.38963	10	0.0101119	up
	Gene Ontology	positive regulation of immune system process	GO:0002684	4.99649	15	0.0104868	up
	Gene Ontology	cell activation	GO:0001775	7.41025	19	0.011099	up
	Gene Ontology	regulation of lymphocyte activation	GO:0051249	2.96893	11	0.0120026	up
	Gene Ontology	alpha-beta T cell proliferation	GO:0046633	0.337927	4	0.0161303	up
	Gene Ontology	tetrahydrofolate metabolic process	GO:0046653	0.144826	3	0.0161303	up
	Gene Ontology	zinc ion binding	GO:0008270	33.4065	16	0.0174358	down
	Gene Ontology	peptide binding	GO:0042277	3.18617	11	0.0188388	up
	Gene Ontology	gene expression	GO:0010467	67.3199	44	0.0202063	down
	Gene Ontology	regulation of leukocyte activation	GO:0002694	3.35513	11	0.0240611	up
	Gene Ontology	RNA binding	GO:0003723	13.5895	3	0.0240611	down
	Gene Ontology	leukotriene-C4 synthase activity	GO:0004464	0.0482753	2	0.0240611	up
	Gene Ontology	complement component C1 complex	GO:0005602	0.0482753	2	0.0240611	up
	Gene Ontology	indoleamine 2,3-dioxygenase activity	GO:0033754	0.0482753	2	0.0240611	up
	Gene Ontology	membrane-bounded organelle	GO:0043227	148.688	121	0.0240611	down
	Gene Ontology	intracellular membrane-bounded organelle	GO:0043231	148.519	121	0.0240611	down
	Gene Ontology	inflammatory response	GO:0006954	6.97578	17	0.0248161	up
	Gene Ontology	enzyme activator activity	GO:0008047	6.32406	16	0.0248161	up
	Gene Ontology	regulation of gene expression	GO:0010468	50.9304	31	0.0248161	down
	Gene Ontology	plasma membrane part	GO:0044459	31.6444	50	0.0248161	up
	Gene Ontology	regulation of signaling process	GO:0023051	14.5791	28	0.025208	up
	Gene Ontology	transcription	GO:0006350	47.0684	28	0.026625	down
	Gene Ontology	regulation of cell activation	GO:0050865	3.57237	11	0.0314091	up
	Gene Ontology	defense response	GO:0006952	12.1895	24	0.0363836	up
	Gene Ontology	positive regulation of T cell proliferation	GO:0042102	0.82068	5	0.0363836	up
	Gene Ontology	organelle	GO:0043226	162.495	137	0.0363836	down
	Gene Ontology	primary metabolic process	GO:0044238	132.564	107	0.0363836	down
	Gene Ontology	regulation of transcription	GO:0045449	45.0891	27	0.0363836	down
	Gene Ontology	regulation of lymphocyte proliferation	GO:0050670	1.64136	7	0.0363836	up
	Gene Ontology	regulation of macromolecule metabolic process	GO:0060255	59.3303	39	0.0363836	down
	Gene Ontology	regulation of signal transduction	GO:0009966	14.4584	27	0.0367521	up
	Gene Ontology	regulation of mononuclear cell proliferation	GO:0032944	1.6655	7	0.0367521	up
	Gene Ontology	regulation of T cell proliferation	GO:0042129	1.23102	6	0.0367521	up
	Gene Ontology	intracellular organelle	GO:0043229	162.253	137	0.0367521	down
	Gene Ontology	folic acid and derivative metabolic process	GO:0006760	0.241376	3	0.0384146	up
	Gene Ontology	regulation of leukocyte proliferation	GO:0070663	1.68963	7	0.0384146	up
	Gene Ontology	nucleotide receptor activity, G-protein coupled	GO:0001608	0.531028	4	0.0390801	up
	Gene Ontology	regulation of angiotensin levels in blood	GO:0002002	0.0724129	2	0.0390801	up
	Gene Ontology	leukocyte cell-cell adhesion	GO:0007159	0.531028	4	0.0390801	up
	Gene Ontology	signal transduction	GO:0007165	39.0064	57	0.0390801	up
	Gene Ontology	cell recognition	GO:0008037	0.893093	5	0.0390801	up
	Gene Ontology	response to wounding	GO:0009611	11.055	22	0.0390801	up
	Gene Ontology	external side of plasma membrane	GO:0009897	2.2448	8	0.0390801	up
	Gene Ontology	cellular macromolecule biosynthetic process	GO:0034645	61.8165	42	0.0390801	down
	Gene Ontology	post-translational protein modification	GO:0043687	27.9514	14	0.0390801	down
	Gene Ontology	cellular protein metabolic process	GO:0044267	45.3305	28	0.0390801	down
	Gene Ontology	purinergic nucleotide receptor activity, G-protein coupled	GO:0045028	0.531028	4	0.0390801	up
	Gene Ontology	negative regulation of lymphocyte activation	GO:0051250	0.893093	5	0.0390801	up
	Gene Ontology	Rab GTPase activator activity	GO:0005097	0.91723	5	0.0404173	up
	Gene Ontology	plasma membrane	GO:0005886	55.0338	75	0.0404173	up
	Gene Ontology	pattern recognition receptor activity	GO:0008329	0.265514	3	0.0404173	up
	Gene Ontology	ribonucleoprotein complex	GO:0030529	10.0895	2	0.0404173	down
	Gene Ontology	regulation of Rab GTPase activity	GO:0032313	0.91723	5	0.0404173	up
	Gene Ontology	regulation of Rab protein signal transduction	GO:0032483	0.91723	5	0.0404173	up
	Gene Ontology	cellular biogenic amine catabolic process	GO:0042402	0.265514	3	0.0404173	up
	Gene Ontology	regulation of cytokine production	GO:0001817	3.98271	11	0.0412565	up
	Gene Ontology	Ras GTPase activator activity	GO:0005099	1.81032	7	0.0412565	up
	Gene Ontology	RNA metabolic process	GO:0016070	44.896	28	0.0419608	down
	Gene Ontology	negative regulation of leukocyte activation	GO:0002695	0.941368	5	0.0425436	up
	Gene Ontology	regulation of immune response	GO:0050776	4.65856	12	0.0449867	up
	Gene Ontology	regulation of T cell activation	GO:0050863	2.36549	8	0.0449867	up
	Gene Ontology	DNA binding	GO:0003677	38.5478	23	0.0463228	down
	Gene Ontology	regulation of signaling pathway	GO:0035466	18.2722	31	0.0464833	up
	Gene Ontology	positive regulation of immune response	GO:0050778	2.94479	9	0.04755	up
	Gene Ontology	integrin binding	GO:0005178	0.989643	5	0.0488098	up
	Gene Ontology	alpha-beta T cell activation	GO:0046631	0.989643	5	0.0488098	up
	Gene Ontology	membrane-enclosed lumen	GO:0031974	37.0995	22	0.0488451	down
	Gene Ontology	GTPase activator activity	GO:0005096	4.15167	11	0.0497203	up
miR-940 (192/189)	KEGG	NOD-like receptor signaling pathway	4621	0.938578	6	0.0184199	up
	Gene Ontology	response to bacterium	GO:0009617	2.2121	12	0.00262318	up
	Gene Ontology	cytokine production	GO:0001816	2.7885	12	0.00279518	up
	Gene Ontology	regulation of cytokine production	GO:0001817	2.5704	12	0.00279518	up
	Gene Ontology	positive regulation of cytokine production	GO:0001819	1.38646	9	0.00279518	up
	Gene Ontology	response to molecule of bacterial origin	GO:0002237	1.5734	9	0.00279518	up
	Gene Ontology	regulation of acute inflammatory response	GO:0002673	0.34272	5	0.00279518	up
	Gene Ontology	regulation of defense response	GO:0031347	1.94727	10	0.00279518	up
	Gene Ontology	positive regulation of defense response	GO:0031349	1.09047	8	0.00279518	up
	Gene Ontology	interleukin-6 production	GO:0032635	0.576393	6	0.00279518	up
	Gene Ontology	regulation of interleukin-6 production	GO:0032675	0.545237	6	0.00279518	up
	Gene Ontology	positive regulation of interleukin-6 production	GO:0032755	0.327142	5	0.00279518	up
	Gene Ontology	defense response to bacterium	GO:0042742	0.887957	7	0.00279518	up
	Gene Ontology	cadmium ion binding	GO:0046870	0.077891	3	0.00344988	up
	Gene Ontology	response to other organism	GO:0051707	4.03475	14	0.004682	up
	Gene Ontology	positive regulation of acute inflammatory response	GO:0002675	0.249251	4	0.00736887	up
	Gene Ontology	positive regulation of lymphocyte proliferation	GO:0050671	0.763331	6	0.00813877	up
	Gene Ontology	positive regulation of mononuclear cell proliferation	GO:0032946	0.77891	6	0.00840704	up
	Gene Ontology	lymphocyte proliferation	GO:0046651	1.49551	8	0.00840704	up
	Gene Ontology	positive regulation of leukocyte proliferation	GO:0070665	0.794488	6	0.00860221	up
	Gene Ontology	mononuclear cell proliferation	GO:0032943	1.52666	8	0.00874542	up
	Gene Ontology	leukocyte proliferation	GO:0070661	1.54224	8	0.00894239	up
	Gene Ontology	regulation of immune response	GO:0050776	3.00659	11	0.0121027	up
	Gene Ontology	peptidyl-tyrosine sulfation	GO:0006478	0.0311564	2	0.0124103	up
	Gene Ontology	protein-tyrosine sulfotransferase activity	GO:0008476	0.0311564	2	0.0124103	up
	Gene Ontology	regulation of fever	GO:0031620	0.140204	3	0.0128481	up
	Gene Ontology	positive regulation of fever	GO:0031622	0.140204	3	0.0128481	up
	Gene Ontology	response to peptidoglycan	GO:0032494	0.140204	3	0.0128481	up
	Gene Ontology	defense response to Gram-positive bacterium	GO:0050830	0.327142	4	0.0128481	up
	Gene Ontology	regulation of leukocyte activation	GO:0002694	2.16537	9	0.0131907	up
	Gene Ontology	leukocyte activation	GO:0045321	4.22169	13	0.0131907	up
	Gene Ontology	immune system process	GO:0002376	12.7118	26	0.0137308	up
	Gene Ontology	positive regulation of immune system process	GO:0002684	3.22469	11	0.0137308	up
	Gene Ontology	regulation of heat generation	GO:0031650	0.155782	3	0.0137308	up
	Gene Ontology	positive regulation of heat generation	GO:0031652	0.155782	3	0.0137308	up
	Gene Ontology	positive regulation of stress-activated MAPK cascade	GO:0032874	0.155782	3	0.0137308	up
	Gene Ontology	regulation of interleukin-6 biosynthetic process	GO:0045408	0.155782	3	0.0137308	up
	Gene Ontology	positive regulation of multicellular organismal process	GO:0051240	3.17795	11	0.0137308	up
	Gene Ontology	positive regulation of response to stimulus	GO:0048584	3.27142	11	0.0144576	up
	Gene Ontology	positive regulation of adaptive immune response based on somatic recombination of immune receptors built from immunoglobulin superfamily domains	GO:0002824	0.373877	4	0.0150109	up
	Gene Ontology	fever	GO:0001660	0.17136	3	0.0154028	up
	Gene Ontology	positive regulation of leukocyte activation	GO:0002696	1.41762	7	0.0154028	up
	Gene Ontology	regulation of adaptive immune response	GO:0002819	0.701019	5	0.0154028	up
	Gene Ontology	positive regulation of adaptive immune response	GO:0002821	0.389455	4	0.0154028	up
	Gene Ontology	regulation of adaptive immune response based on somatic recombination of immune receptors built from immunoglobulin superfamily domains	GO:0002822	0.68544	5	0.0154028	up
	Gene Ontology	response to biotic stimulus	GO:0009607	5.12522	14	0.0154028	up
	Gene Ontology	regulation of JNK cascade	GO:0046328	1.04374	6	0.0154028	up
	Gene Ontology	regulation of lymphocyte proliferation	GO:0050670	1.05932	6	0.0154028	up
	Gene Ontology	regulation of inflammatory response	GO:0050727	1.05932	6	0.0154028	up
	Gene Ontology	positive regulation of immune response	GO:0050778	1.90054	8	0.0154028	up
	Gene Ontology	regulation of cell activation	GO:0050865	2.30557	9	0.0154028	up
	Gene Ontology	positive regulation of cell activation	GO:0050867	1.46435	7	0.0154028	up
	Gene Ontology	regulation of response to stress	GO:0080134	3.89455	12	0.0154028	up
	Gene Ontology	regulation of mononuclear cell proliferation	GO:0032944	1.0749	6	0.0162882	up
	Gene Ontology	positive regulation of T-helper 1 type immune response	GO:0002827	0.0467346	2	0.016354	up
	Gene Ontology	interleukin-6 biosynthetic process	GO:0042226	0.186938	3	0.016354	up
	Gene Ontology	regulation of response to stimulus	GO:0048583	6.44937	16	0.016354	up
	Gene Ontology	regulation of leukocyte proliferation	GO:0070663	1.09047	6	0.016354	up
	Gene Ontology	vascular endothelial growth factor production	GO:0010573	0.202516	3	0.0185681	up
	Gene Ontology	regulation of vascular endothelial growth factor production	GO:0010574	0.202516	3	0.0185681	up
	Gene Ontology	heat generation	GO:0031649	0.202516	3	0.0185681	up
	Gene Ontology	regulation of stress-activated MAPK cascade	GO:0032872	0.202516	3	0.0185681	up
	Gene Ontology	T cell proliferation	GO:0042098	1.12163	6	0.0185681	up
	Gene Ontology	regulation of stress-activated protein kinase signaling cascade	GO:0070302	1.13721	6	0.0185681	up
	Gene Ontology	cell activation	GO:0001775	4.7825	13	0.019933	up
	Gene Ontology	viral reproduction	GO:0016032	1.18394	6	0.0221433	up
	Gene Ontology	cytoplasm	GO:0005737	88.3439	109	0.0237754	up
	Gene Ontology	toll-like receptor 4 signaling pathway	GO:0034142	0.0623128	2	0.026128	up
	Gene Ontology	regulation of immune system process	GO:0002682	5.10965	13	0.0320269	up
	Gene Ontology	inflammatory response	GO:0006954	4.5021	12	0.0320269	up
	Gene Ontology	positive regulation of T cell proliferation	GO:0042102	0.529658	4	0.0320269	up
	Gene Ontology	positive regulation of lymphocyte activation	GO:0051251	1.29299	6	0.0320269	up
	Gene Ontology	stress-activated MAPK cascade	GO:0051403	0.249251	3	0.0320269	up
	Gene Ontology	multi-organism process	GO:0051704	9.09766	19	0.0320269	up
	Gene Ontology	acute-phase response	GO:0006953	0.545237	4	0.0336601	up
	Gene Ontology	positive regulation of inflammatory response	GO:0050729	0.545237	4	0.0336601	up
	Gene Ontology	immune response-activating signal transduction	GO:0002757	0.919113	5	0.0357517	up
	Gene Ontology	protein amino acid sulfation	GO:0006477	0.077891	2	0.036565	up
	Gene Ontology	defense response	GO:0006952	7.86699	17	0.036565	up
	Gene Ontology	JNK cascade	GO:0007254	1.3553	6	0.036565	up
	Gene Ontology	toll-like receptor signaling pathway	GO:0002224	0.280407	3	0.0370789	up
	Gene Ontology	nucleic acid binding	GO:0003676	35.6429	21	0.0370789	down
	Gene Ontology	T-helper 1 type immune response	GO:0042088	0.280407	3	0.0370789	up
	Gene Ontology	positive regulation of JUN kinase activity	GO:0043507	0.576393	4	0.0370789	up
	Gene Ontology	positive regulation of JNK cascade	GO:0046330	0.280407	3	0.0370789	up
	Gene Ontology	lymphocyte activation	GO:0046649	3.45836	10	0.0370789	up
	Gene Ontology	immune response-regulating signaling pathway	GO:0002764	0.965848	5	0.0393365	up
	Gene Ontology	regulation of B cell activation	GO:0050864	0.591971	4	0.039451	up
	Gene Ontology	response to lipopolysaccharide	GO:0032496	1.41762	6	0.0411737	up
	Gene Ontology	regulation of lymphocyte activation	GO:0051249	1.91612	7	0.0428588	up
	Gene Ontology	regulation of cytokine biosynthetic process	GO:0042035	0.997004	5	0.0431974	up
	Gene Ontology	aging	GO:0007568	1.44877	6	0.0437849	up
	Gene Ontology	cell proliferation	GO:0008283	13.2726	24	0.0437849	up
	Gene Ontology	response to chemical stimulus	GO:0042221	17.136	29	0.0437849	up
	Gene Ontology	regulation of JUN kinase activity	GO:0043506	0.623128	4	0.0437849	up
	Gene Ontology	positive regulation of T cell activation	GO:0050870	1.01258	5	0.0437849	up
	Gene Ontology	pattern recognition receptor signaling pathway	GO:0002221	0.311564	3	0.044367	up
	Gene Ontology	positive regulation of interleukin-6 biosynthetic process	GO:0045410	0.0934691	2	0.044367	up
	Gene Ontology	adaptive immune response based on somatic recombination of immune receptors built from immunoglobulin superfamily domains	GO:0002460	1.47993	6	0.0449649	up
	Gene Ontology	SH3/SH2 adaptor activity	GO:0005070	0.638706	4	0.0449649	up
	Gene Ontology	response to organic substance	GO:0010033	10.3595	20	0.0449649	up
	Gene Ontology	positive regulation of innate immune response	GO:0045089	0.638706	4	0.0449649	up
	Gene Ontology	immune response	GO:0006955	8.25644	17	0.0454642	up
	Gene Ontology	stress-activated protein kinase signaling cascade	GO:0031098	1.49551	6	0.0454642	up
	Gene Ontology	regulation of cell proliferation	GO:0042127	9.68963	19	0.0454642	up
	Gene Ontology	temperature homeostasis	GO:0001659	0.327142	3	0.0460768	up
	Gene Ontology	adaptive immune response	GO:0002250	1.51108	6	0.0460768	up
	Gene Ontology	innate immune response-activating signal transduction	GO:0002758	0.327142	3	0.0460768	up
	Gene Ontology	regulation of chemokine production	GO:0032642	0.327142	3	0.0460768	up
	Gene Ontology	sulfur metabolic process	GO:0006790	1.52666	6	0.0480166	up
	Gene Ontology	activation of innate immune response	GO:0002218	0.34272	3	0.0498001	up
	Gene Ontology	cytokine biosynthetic process	GO:0042089	1.09047	5	0.0498001	up
	Gene Ontology	peptide binding	GO:0042277	2.05632	7	0.0498001	up
	Gene Ontology	response to dsRNA	GO:0043331	0.34272	3	0.0498001	up
	Gene Ontology	positive regulation of nitric oxide biosynthetic process	GO:0045429	0.34272	3	0.0498001	up
	Gene Ontology	positive regulation of stress-activated protein kinase signaling cascade	GO:0070304	0.34272	3	0.0498001	up
miR-1280 (108/107)	KEGG	Jak-STAT signaling pathway	4630	1.48707	7	0.0193504	up
	Gene Ontology	trans-hexaprenyltranstransferase activity	GO:0000010	0.0172901	2	0.0197339	up
	Gene Ontology	cytokine activity	GO:0005125	1.14115	7	0.0197339	up
	Gene Ontology	extracellular space	GO:0005615	3.95943	13	0.0197339	up
	Gene Ontology	JAK-STAT cascade	GO:0007259	0.432252	5	0.0197339	up
	Gene Ontology	peptidyl-amino acid modification	GO:0018193	1.58204	8	0.0197339	up
	Gene Ontology	positive regulation of tyrosine phosphorylation of STAT protein	GO:0042531	0.112386	3	0.0197339	up
	Gene Ontology	defense response to bacterium	GO:0042742	0.492767	5	0.0197339	up
	Gene Ontology	trans-octaprenyltranstransferase activity	GO:0050347	0.0172901	2	0.0197339	up
	Gene Ontology	phagocytic vesicle	GO:0045335	0.121031	3	0.0205674	up
	Gene Ontology	positive regulation of JAK-STAT cascade	GO:0046427	0.129676	3	0.0229933	up
	Gene Ontology	positive regulation of defense response	GO:0031349	0.605153	5	0.0267819	up
	Gene Ontology	positive regulation of immune system process	GO:0002684	1.78952	8	0.0303018	up
	Gene Ontology	regulation of tyrosine phosphorylation of STAT protein	GO:0042509	0.172901	3	0.042945	up
	Gene Ontology	regulation of defense response	GO:0031347	1.08063	6	0.0456732	up
miR-1307 (96/94)	KEGG	Systemic lupus erythematosus	5322	0.829203	8	3.44233e-05	up
	Gene Ontology	B cell activation	GO:0042113	0.65514	7	0.00323783	up
	Gene Ontology	unsaturated fatty acid biosynthetic process	GO:0006636	0.205683	4	0.00844351	up
	Gene Ontology	cellular component assembly	GO:0022607	5.78961	17	0.00844351	up
	Gene Ontology	icosanoid biosynthetic process	GO:0046456	0.18283	4	0.00844351	up
	Gene Ontology	lymphocyte activation	GO:0046649	1.69118	9	0.00844351	up
	Gene Ontology	nucleosome	GO:0000786	0.281863	4	0.00938307	up
	Gene Ontology	leukocyte differentiation	GO:0002521	1.18839	7	0.00938307	up
	Gene Ontology	regulation of immune system process	GO:0002682	2.49867	10	0.00938307	up
	Gene Ontology	icosanoid metabolic process	GO:0006690	0.266627	4	0.00938307	up
	Gene Ontology	leukotriene metabolic process	GO:0006691	0.114269	3	0.00938307	up
	Gene Ontology	leukotriene biosynthetic process	GO:0019370	0.0990328	3	0.00938307	up
	Gene Ontology	regulation of granulocyte macrophage colony-stimulating factor production	GO:0032645	0.0228537	2	0.00938307	up
	Gene Ontology	unsaturated fatty acid metabolic process	GO:0033559	0.28948	4	0.00938307	up
	Gene Ontology	cellular alkene metabolic process	GO:0043449	0.114269	3	0.00938307	up
	Gene Ontology	alkene biosynthetic process	GO:0043450	0.0990328	3	0.00938307	up
	Gene Ontology	regulation of granulocyte macrophage colony-stimulating factor biosynthetic process	GO:0045423	0.0228537	2	0.00938307	up
	Gene Ontology	positive regulation of granulocyte macrophage colony-stimulating factor biosynthetic process	GO:0045425	0.0228537	2	0.00938307	up
	Gene Ontology	T cell proliferation	GO:0042098	0.548489	5	0.00944955	up
	Gene Ontology	leukocyte activation	GO:0045321	2.06445	9	0.00944955	up
	Gene Ontology	cellular component biogenesis	GO:0044085	6.58187	17	0.0101038	up
	Gene Ontology	positive regulation of alpha-beta T cell differentiation	GO:0046638	0.129504	3	0.0107215	up
	Gene Ontology	granulocyte macrophage colony-stimulating factor production	GO:0032604	0.0304716	2	0.0124059	up
	Gene Ontology	granulocyte macrophage colony-stimulating factor biosynthetic process	GO:0042253	0.0304716	2	0.0124059	up
	Gene Ontology	positive regulation of lymphocyte activation	GO:0051251	0.632286	5	0.014538	up
	Gene Ontology	positive regulation of alpha-beta T cell activation	GO:0046635	0.152358	3	0.0148507	up
	Gene Ontology	cell activation	GO:0001775	2.3387	9	0.0151765	up
	Gene Ontology	cell activation involved in immune response	GO:0002263	0.388513	4	0.0151765	up
	Gene Ontology	leukocyte activation involved in immune response	GO:0002366	0.388513	4	0.0151765	up
	Gene Ontology	nucleosome assembly	GO:0006334	0.380895	4	0.0151765	up
	Gene Ontology	positive regulation of mononuclear cell proliferation	GO:0032946	0.380895	4	0.0151765	up
	Gene Ontology	regulation of alpha-beta T cell differentiation	GO:0046637	0.159976	3	0.0151765	up
	Gene Ontology	positive regulation of lymphocyte proliferation	GO:0050671	0.373277	4	0.0151765	up
	Gene Ontology	positive regulation of leukocyte proliferation	GO:0070665	0.388513	4	0.0151765	up
	Gene Ontology	positive regulation of leukocyte activation	GO:0002696	0.693229	5	0.0156718	up
	Gene Ontology	regulation of immune response	GO:0050776	1.47026	7	0.0158271	up
	Gene Ontology	hemopoiesis	GO:0030097	1.93495	8	0.0159715	up
	Gene Ontology	chromatin assembly	GO:0031497	0.411367	4	0.0159715	up
	Gene Ontology	positive regulation of cell activation	GO:0050867	0.716083	5	0.0159715	up
	Gene Ontology	DNA conformation change	GO:0071103	0.716083	5	0.0159715	up
	Gene Ontology	chromosome	GO:0005694	2.98622	10	0.0161489	up
	Gene Ontology	lymphocyte proliferation	GO:0046651	0.731319	5	0.0165807	up
	Gene Ontology	positive regulation of T cell differentiation	GO:0045582	0.190448	3	0.0169468	up
	Gene Ontology	positive regulation of lymphocyte differentiation	GO:0045621	0.190448	3	0.0169468	up
	Gene Ontology	mononuclear cell proliferation	GO:0032943	0.746555	5	0.0169626	up
	Gene Ontology	leukocyte proliferation	GO:0070661	0.754173	5	0.0173643	up
	Gene Ontology	hemopoietic or lymphoid organ development	GO:0048534	2.03398	8	0.017406	up
	Gene Ontology	lymphocyte activation involved in immune response	GO:0002285	0.205683	3	0.0179724	up
	Gene Ontology	amine transport	GO:0015837	0.777026	5	0.0179724	up
	Gene Ontology	lymphocyte differentiation	GO:0030098	0.777026	5	0.0179724	up
	Gene Ontology	nucleosome organization	GO:0034728	0.449456	4	0.0179724	up
	Gene Ontology	positive regulation of B cell activation	GO:0050871	0.205683	3	0.0179724	up
	Gene Ontology	cellular macromolecular complex assembly	GO:0034622	2.10254	8	0.018018	up
	Gene Ontology	positive regulation of T-helper cell differentiation	GO:0045624	0.0533253	2	0.018018	up
	Gene Ontology	positive regulation of alpha-beta T cell proliferation	GO:0046641	0.0533253	2	0.018018	up
	Gene Ontology	macromolecular complex assembly	GO:0065003	4.30412	12	0.018018	up
	Gene Ontology	regulation of alpha-beta T cell activation	GO:0046634	0.213301	3	0.0182314	up
	Gene Ontology	T cell activation	GO:0042110	1.21125	6	0.0192024	up
	Gene Ontology	protein-DNA complex assembly	GO:0065004	0.479928	4	0.0192024	up
	Gene Ontology	regulation of cytokine biosynthetic process	GO:0042035	0.487546	4	0.0200193	up
	Gene Ontology	immune system development	GO:0002520	2.17872	8	0.0205139	up
	Gene Ontology	positive regulation of T cell activation	GO:0050870	0.495164	4	0.0205139	up
	Gene Ontology	positive regulation of heart contraction	GO:0045823	0.0609433	2	0.0210543	up
	Gene Ontology	protein-DNA complex	GO:0032993	0.5104	4	0.0222285	up
	Gene Ontology	regulation of lymphocyte proliferation	GO:0050670	0.518018	4	0.0231149	up
	Gene Ontology	arachidonic acid metabolic process	GO:0019369	0.0685612	2	0.0231948	up
	Gene Ontology	regulation of mononuclear cell proliferation	GO:0032944	0.525636	4	0.0231948	up
	Gene Ontology	cytokine biosynthetic process	GO:0042089	0.533253	4	0.0231948	up
	Gene Ontology	positive regulation of CD4-positive, alpha beta T cell differentiation	GO:0043372	0.0685612	2	0.0231948	up
	Gene Ontology	positive regulation of myeloid cell differentiation	GO:0045639	0.251391	3	0.0231948	up
	Gene Ontology	alpha-beta T cell differentiation	GO:0046632	0.243773	3	0.0231948	up
	Gene Ontology	immunoglobulin secretion	GO:0048305	0.0685612	2	0.0231948	up
	Gene Ontology	regulation of leukocyte proliferation	GO:0070663	0.533253	4	0.0231948	up
	Gene Ontology	cytokine metabolic process	GO:0042107	0.540871	4	0.0237633	up
	Gene Ontology	positive regulation of T cell proliferation	GO:0042102	0.259009	3	0.0243848	up
	Gene Ontology	DNA packaging	GO:0006323	0.563725	4	0.0262937	up
	Gene Ontology	lymphocyte costimulation	GO:0031294	0.0761791	2	0.0262937	up
	Gene Ontology	T cell costimulation	GO:0031295	0.0761791	2	0.0262937	up
	Gene Ontology	positive regulation of interleukin-2 biosynthetic process	GO:0045086	0.0761791	2	0.0262937	up
	Gene Ontology	regulation of lymphocyte activation	GO:0051249	0.937002	5	0.0262937	up
	Gene Ontology	macromolecular complex subunit organization	GO:0043933	4.76119	12	0.0280324	up
	Gene Ontology	fatty acid biosynthetic process	GO:0006633	0.586579	4	0.0288144	up
	Gene Ontology	chromosomal part	GO:0044427	2.44535	8	0.0296703	up
	Gene Ontology	regulation of T-helper cell differentiation	GO:0045622	0.083797	2	0.0296703	up
	Gene Ontology	positive regulation of exocytosis	GO:0045921	0.083797	2	0.0296703	up
	Gene Ontology	regulation of alpha-beta T cell proliferation	GO:0046640	0.083797	2	0.0296703	up
	Gene Ontology	regulation of B cell activation	GO:0050864	0.28948	3	0.0296703	up
	Gene Ontology	immune system process	GO:0002376	6.21621	14	0.0318818	up
	Gene Ontology	positive regulation of cell differentiation	GO:0045597	1.46264	6	0.0325538	up
	Gene Ontology	B cell differentiation	GO:0030183	0.312334	3	0.0339952	up
	Gene Ontology	regulation of T cell differentiation	GO:0045580	0.312334	3	0.0339952	up
	Gene Ontology	alpha-beta T cell activation	GO:0046631	0.312334	3	0.0339952	up
	Gene Ontology	cellular macromolecular complex subunit organization	GO:0034621	2.52914	8	0.0340405	up
	Gene Ontology	regulation of leukocyte activation	GO:0002694	1.05889	5	0.036952	up
	Gene Ontology	regulation of CD4-positive, alpha beta T cell differentiation	GO:0043370	0.0990328	2	0.036952	up
	Gene Ontology	positive regulation of neuron apoptosis	GO:0043525	0.0990328	2	0.036952	up
	Gene Ontology	regulation of response to stimulus	GO:0048583	3.15381	9	0.036952	up
	Gene Ontology	regulation of adaptive immune response based on somatic recombination of immune receptors built from immunoglobulin superfamily domains	GO:0002822	0.335188	3	0.0387042	up
	Gene Ontology	response to bacterium	GO:0009617	1.08174	5	0.0387042	up
	Gene Ontology	positive regulation of immune system process	GO:0002684	1.57691	6	0.039071	up
	Gene Ontology	regulation of adaptive immune response	GO:0002819	0.342806	3	0.039071	up
	Gene Ontology	chromatin assembly or disassembly	GO:0006333	0.685612	4	0.039071	up
	Gene Ontology	defense response	GO:0006952	3.84704	10	0.039071	up
	Gene Ontology	cell proliferation	GO:0008283	6.49046	14	0.039071	up
	Gene Ontology	coreceptor activity	GO:0015026	0.106651	2	0.039071	up
	Gene Ontology	positive regulation of cytokine biosynthetic process	GO:0042108	0.342806	3	0.039071	up
	Gene Ontology	alpha-beta T cell proliferation	GO:0046633	0.106651	2	0.039071	up
	Gene Ontology	regulation of muscle contraction	GO:0006937	0.350424	3	0.0396895	up
	Gene Ontology	regulation of lymphocyte differentiation	GO:0045619	0.350424	3	0.0396895	up
	Gene Ontology	positive regulation of response to stimulus	GO:0048584	1.59976	6	0.0406473	up
	Gene Ontology	regulation of cell activation	GO:0050865	1.12745	5	0.0410504	up
	Gene Ontology	aging	GO:0007568	0.708465	4	0.041378	up
	Gene Ontology	CD4-positive, alpha-beta T cell differentiation involved in immune response	GO:0002294	0.114269	2	0.0414766	up
	Gene Ontology	T-helper cell differentiation	GO:0042093	0.114269	2	0.0414766	up
	Gene Ontology	regulation of interleukin-2 biosynthetic process	GO:0045076	0.114269	2	0.0414766	up
	Gene Ontology	cellular lipid metabolic process	GO:0044255	3.33664	9	0.0439097	up
	Gene Ontology	alpha-beta T cell activation involved in immune response	GO:0002287	0.121887	2	0.0448098	up
	Gene Ontology	T cell differentiation involved in immune response	GO:0002292	0.121887	2	0.0448098	up
	Gene Ontology	alpha-beta T cell differentiation involved in immune response	GO:0002293	0.121887	2	0.0448098	up
	Gene Ontology	interleukin-2 biosynthetic process	GO:0042094	0.121887	2	0.0448098	up
	Gene Ontology	positive regulation of muscle contraction	GO:0045933	0.121887	2	0.0448098	up
	Gene Ontology	regulation of T cell activation	GO:0050863	0.746555	4	0.0456337	up
	Gene Ontology	regulation of T cell proliferation	GO:0042129	0.388513	3	0.0465215	up
	Gene Ontology	regulation of muscle system process	GO:0090257	0.388513	3	0.0465215	up
	Gene Ontology	immune response	GO:0006955	4.03749	10	0.0465726	up
	Gene Ontology	lipid biosynthetic process	GO:0008610	2.24728	7	0.0481507	up
1 Figures in brackets represent the number of significantly correlated genes and, if different, the number of known IDs with sequence in GeneTrail

## Sheet: Table S7
Table S7. List of expressed genes in miR-29 perturbation experiments, with fold changes and p-values for all computed comparisons
	miR-29 inhibitor vs control, non infected			miR-29 mimic vs control, non infected			miR-29 inhibitor vs control, H37Rv infection			miR-29 mimic vs control, H37Rv infection			(Control inhibitor upon infection)*(miR-29 inhibitor upon infection)			(Control mimic upon infection)*(miR-29 mimic upon infection)
mRNA	log2FC	P-value	FDR-corrected p-value	log2FC	P-value	FDR-corrected p-value	log2FC	P-value	FDR-corrected p-value	log2FC	P-value	FDR-corrected p-value	log2FC	P-value	FDR-corrected p-value	log2FC	P-value	FDR-corrected p-value
A2LD1	0.030274914852094	0.445786229085141	0.697575424471756	-0.103698603925785	0.0140480473243651	0.159983495650329	0.0723772976853603	0.076470893619223	0.285725228491732	-0.0642092628245789	0.113460982388451	0.54451613893565	-0.0421023828332663	0.453301662705692	0.919360149756116	-0.0394893411012065	0.481495698838772	0.99986486487325
A2M	-0.0562912994870679	0.69850498290961	0.865401527020011	-0.000498476809072557	0.997258729438551	0.999301510874202	0.0125827821006386	0.930895783393393	0.977694915673279	0.0460771335803152	0.75107026930803	0.954652770036284	-0.0688740815877065	0.737435078163646	0.971530381696323	-0.0465756103893877	0.820529599286457	0.99986486487325
A4GALT	-0.0822916543383112	0.359217951206944	0.623007491625831	-0.0964794266490969	0.284044251575011	0.698332493549632	-0.285168771887649	0.00358351893564635	0.0457230449634145	-0.149380046160124	0.102906671711764	0.521541686831203	0.202877117549338	0.116488134038118	0.718489316480426	0.0529006195110275	0.674606405398676	0.99986486487325
AAAS	0.0348999324198278	0.110447076404665	0.320117239692457	0.00055597801782703	0.979131428520664	0.997361370501668	0.0141940203138811	0.506327124997451	0.762572727623513	-0.0144272923316899	0.499433504835822	0.869720047887217	0.0207059121059467	0.49315644642766	0.928780469408991	0.014983270349517	0.619107581863133	0.99986486487325
AACS	0.0105595783999224	0.641012975729067	0.830958887970596	0.000625506126963771	0.977912052331184	0.997361370501668	0.0370146884772469	0.111189789484792	0.354716061561084	-0.00793230773535036	0.725862602195323	0.947248724483575	-0.0264551100773245	0.411152783213047	0.905610447445428	0.00855781386231413	0.788977732810199	0.99986486487325
AAED1	0.0922169743934447	0.0669282019725815	0.239367331952552	0.0314384112119104	0.518642362700583	0.871592217065222	0.107163556259867	0.0354186428799232	0.17886135474307	0.00705010605297218	0.884416412583638	0.984569939509967	-0.0149465818664218	0.827533701749315	0.984739698165964	0.0243883051589382	0.722452350093491	0.99986486487325
AAGAB	-0.0845419430501426	0.123383834585726	0.340821687372471	-0.0297962281849404	0.578469308155012	0.901552155148103	-0.100345103306299	0.0702535099435807	0.271030200946532	0.0243912631605419	0.648863124249811	0.920923737120171	0.0158031602561568	0.834459851736379	0.986196337571131	-0.0541874913454823	0.475890331650937	0.99986486487325
AAK1	-0.0250192071071922	0.546901398884549	0.771765410173351	0.044602724892691	0.286958244376867	0.701187265982347	-0.0290187532790265	0.485330433235786	0.750388241597329	0.0155658553638141	0.707132254563372	0.942718025921284	0.00399954617183429	0.945495748660651	0.993430318638325	0.029036869528877	0.620589997880328	0.99986486487325
AAMP	0.0176038047902862	0.683737991828681	0.856943768250283	-0.0278107991006546	0.520988037268118	0.871592217065222	0.00840380455403444	0.845591911291725	0.944509386060847	0.0397525286371501	0.361164679855329	0.792418395755641	0.00920000023625178	0.880150905477269	0.992711159798818	-0.0675633277378047	0.274377355582903	0.99986486487325
AAR2	-0.122164884003263	0.050348977442292	0.202026585895794	-0.192111950684598	0.00354035281945545	0.069037259901583	-0.108606864046155	0.0793275310195254	0.292868833306815	-0.171822103960297	0.0079720782992485	0.16824880391371	-0.0135580199571077	0.872696119310154	0.990505457254114	-0.0202898467243013	0.810554559121966	0.99986486487325
AARS	-0.411980502465889	9.11934768996676e-06	0.000457911534720269	-0.0469135912262821	0.525861754297776	0.873799179306996	-0.169857924782592	0.0287658465989411	0.157917157900924	-0.0309898419310901	0.674434193809772	0.931046183330404	-0.242122577683297	0.0276427256419976	0.497131585877603	-0.015923749295192	0.878488938653627	0.99986486487325
AARS2	0.103856098042431	0.0451732263821929	0.190742250243806	0.119956162758251	0.0224724077968706	0.206175223581611	0.0909797103063079	0.0763857290707564	0.285649515999463	0.0243944352678671	0.623612408011256	0.917296635563058	0.0128763877361227	0.854342071613971	0.988337227267625	0.0955617274903844	0.181465008812453	0.99986486487325
AARSD1	0.0577509074480904	0.147417780886921	0.378489146225839	0.0254381858763004	0.515615057476493	0.870535929235885	0.133405471870594	0.00209980943768021	0.0323939295407759	-0.00401809892675864	0.917838150210176	0.989849019751323	-0.0756545644225035	0.178216192461922	0.775660149256825	0.0294562848030591	0.59394346506653	0.99986486487325
AASDH	0.0517463877953812	0.112088135352581	0.32276855770395	0.0283813950116123	0.374295306864146	0.774024329128691	0.029701437847403	0.352878352452228	0.647053771927296	0.0654374907099431	0.0479178088806879	0.39257471725781	0.0220449499479782	0.623470121125107	0.9584132271009	-0.0370560956983308	0.411478725450264	0.99986486487325
AASDHPPT	0.0637899761962419	0.156138569471214	0.391875594833734	0.0758694618476348	0.0945274743637093	0.427687866589099	0.0717364765746868	0.112765592921595	0.356824941711074	-0.00202792905258775	0.963230357735309	0.994533720277291	-0.00794650037844491	0.898374148113435	0.992978763210073	0.0778973909002225	0.218191107700054	0.99986486487325
AATF	-0.040759742841173	0.316367811320374	0.580779317422927	0.131694957002194	0.00304765958959377	0.0623079453872649	-0.103392384397404	0.0160467052670301	0.115339444739087	0.100520286381307	0.0188471295194458	0.262875057593432	0.0626326415562311	0.2772363034111	0.835709183118154	0.0311746706208869	0.584981979426294	0.99986486487325
AATK	-0.0498549457668407	0.313088677130856	0.578500708945881	0.0204393121002173	0.676356121821569	0.933474411992716	-0.0591166597302131	0.233710019511019	0.523857734724553	0.0238916441662003	0.625827742397035	0.917601717143069	0.00926171396337239	0.893415364382234	0.992978763210073	-0.00345233206598294	0.960161137014862	0.99986486487325
ABAT	0.0679096823613277	0.176115316889445	0.420698035124923	-0.0701178297138823	0.163016939953603	0.555135645979491	-0.00774306389862467	0.874958108178889	0.955894477353071	-0.0100955943962147	0.837466115905286	0.97440113922475	0.0756527462599523	0.282952183469137	0.838582052593062	-0.0600222353176676	0.39208073090298	0.99986486487325
ABCA1	-0.266521208492613	0.06807948122306	0.241317720022095	-0.0601861898582889	0.669590039780855	0.932043355837324	0.293079288856668	0.0463862104137307	0.211630619814504	0.218528338101081	0.130157321465019	0.571953004699081	-0.559600497349281	0.00921015843062036	0.357994963519973	-0.278714527959369	0.170308484597731	0.99986486487325
ABCA2	0.042378656595953	0.0745842907635108	0.254619905590529	-0.00216455113078773	0.924838226344121	0.991780572242055	0.0174356561562448	0.450107916003539	0.725761253824499	0.00400854977188647	0.861339378669531	0.980743060309738	0.0249430004397082	0.444949709669263	0.91471275714498	-0.0061731009026742	0.849159119937484	0.99986486487325
ABCA3	0.00892149738671311	0.814472482817786	0.92536579205304	-0.0515959318097323	0.183013062435057	0.580890045587684	-0.0312286682259941	0.41456551209765	0.696583256357564	-0.0897867530211718	0.0254489949064653	0.296177009773894	0.0401501656127072	0.45768141448471	0.920342831805411	0.0381908212114395	0.479670259446128	0.99986486487325
ABCA5	-0.0284709166960608	0.504865023488243	0.743732358542521	0.00224184315808085	0.957918724127435	0.997361370501668	-0.0915124295608196	0.0399056933415247	0.191938795301327	-0.0521727732191728	0.226918305241286	0.685749972757471	0.0630415128647588	0.299809912882896	0.851159014122491	0.0544146163772536	0.369383283933292	0.99986486487325
ABCA6	0.0526233937261438	0.545363702071886	0.7713565526287	-0.11119347684042	0.207462479218374	0.615853731359975	0.0101145141211259	0.907111404276414	0.969313662619427	-0.0198890046492517	0.818601064155746	0.970964728034648	0.0425088796050179	0.729077976615353	0.97132242397193	-0.091304472191168	0.459044568633365	0.99986486487325
ABCA7	-0.110112714396868	0.037653969227831	0.169486952824101	-0.104242552566855	0.0480416313649409	0.311314954428241	-0.0135683562878359	0.788246331474289	0.920107049216202	-0.026689629117624	0.59810282231737	0.909025481965827	-0.0965443581090319	0.184725967320665	0.785104269972171	-0.0775529234492307	0.283419000194628	0.99986486487325
ABCA9	-0.0294303018758102	0.582028761494266	0.795406199937414	-0.00831251170078229	0.876077347063867	0.986349907077711	-0.0391388964586286	0.465302911011678	0.736521767202704	0.00248281807184814	0.962840532688784	0.994533720277291	0.00970859458281836	0.897516328349941	0.992978763210073	-0.0107953297726304	0.886123934619815	0.99986486487325
ABCB10	0.0796478864049206	0.50696488219696	0.745207184700924	-0.0188035018746433	0.874947723818575	0.986349907077711	-0.0229261748207641	0.847854578362683	0.945567107796301	-0.24438681609101	0.0499822004575958	0.402810001453727	0.102574061225685	0.545329102509501	0.938369605211237	0.225583314216367	0.190108241143079	0.99986486487325
ABCB4	-0.0481396004084536	0.213897182124254	0.470379706026535	-0.0102071591706556	0.788797947611264	0.964483799158263	-0.00996384583082222	0.793709890392464	0.923320669007575	0.00511190376898529	0.893217721334588	0.985739814196761	-0.0381757545776313	0.480741190905662	0.924972657443937	-0.0153190629396409	0.776220948626427	0.99986486487325
ABCB6	0.0140745279828867	0.763964838793894	0.900815335448047	-0.175464693757807	0.000944007056049477	0.0280370630658145	-0.0295506075031762	0.529778054988896	0.780016410057192	-0.0725815725510852	0.130719650522704	0.571953004699081	0.0436251354860628	0.512036530756109	0.935998803766539	-0.102883121206721	0.129875460360082	0.99986486487325
ABCB7	0.0748256250272199	0.109099434256442	0.317727193140154	-0.053845528526379	0.242576324366482	0.657099426530788	0.158243469908921	0.00180563477805259	0.0296111778448557	-0.0533600371178302	0.246724675929115	0.702392793566986	-0.0834178448817013	0.201824987988102	0.792579497345924	-0.00048549140854881	0.993965151482816	0.99986486487325
ABCB9	0.180820582793311	0.00934215427257896	0.0687453086896857	0.138155051115024	0.0408271147909899	0.287856620059731	-0.00816578493624398	0.899218156113564	0.965753996374504	0.0236209170346386	0.714455421382474	0.944142505696119	0.188986367729555	0.0472676209443749	0.591460725619066	0.114534134080386	0.216723923445993	0.99986486487325
ABCC1	-0.0152975714337877	0.81909025635979	0.926926208621948	-0.0195613987610317	0.770013456850033	0.960642518541973	0.00511053467706901	0.939063393056687	0.980912957312474	-0.07413001062557	0.273788510536801	0.727747883271505	-0.0204081061108567	0.829168291567355	0.984739698165964	0.0545686118645383	0.565201783879853	0.99986486487325
ABCC10	0.0467623181162704	0.196770652031278	0.449267276317553	-0.0717558180983238	0.0529822912233777	0.325066410502217	0.0615578599723996	0.0934364270258537	0.323343199034373	-0.0536870176980511	0.140583736891014	0.587651027195582	-0.0147955418561292	0.768844843415618	0.977425817587417	-0.0180688004002727	0.719792415418649	0.99986486487325
ABCC3	-0.635946261277134	0.0243214132417913	0.129993760430264	-0.0830133204090338	0.755932269548188	0.957106736010588	-0.399074019819569	0.144054392375622	0.408728287785572	0.178045749839713	0.506607306311023	0.873272863434785	-0.236872241457565	0.531894033602469	0.936787319052477	-0.261059070248747	0.491253449674019	0.99986486487325
ABCC4	0.0466319053644639	0.533849091212225	0.76458562519421	-0.124561395208918	0.105031786951017	0.450404048460186	-0.078875962518179	0.296406374850761	0.591312945442069	-0.00861905515677996	0.908075771203244	0.987843350833504	0.125507867882643	0.241523822627729	0.818133216585293	-0.115942340052138	0.278239439047747	0.99986486487325
ABCC5	0.102821604007626	0.0584563638372415	0.220051386102419	-0.187596683948946	0.00138675544843942	0.0364118028948166	0.0537385579314487	0.308898649911429	0.603970707151339	0.0333518207501386	0.524817181742397	0.879678753117459	0.0490830460761771	0.508269919693678	0.935167131888698	-0.220948504699085	0.00600425001115815	0.99986486487325
ABCD1	-0.0859299678819063	0.0921854330831666	0.28837956117488	0.0439936389844249	0.377693522384516	0.775934525719688	-0.101717327427004	0.0488358992263278	0.217474347934492	0.0485424726247849	0.33125881066059	0.773581868575049	0.0157873595450972	0.821473672263782	0.983644967233485	-0.00454883364036007	0.948133987067425	0.99986486487325
ABCD3	0.079987370578773	0.00234230325933369	0.0270222500866707	-0.0200279027410311	0.400920575012496	0.794148923656341	0.0182489468847669	0.443456567329686	0.720598175860379	-0.00398815337798819	0.866174855027561	0.981402758560692	0.0617384236940062	0.0748770689922723	0.659748414631785	-0.0160397493630429	0.632513758437301	0.99986486487325
ABCE1	0.176010801470619	0.00129270283032965	0.0177022311012916	0.00828881649005453	0.864633618300455	0.984304138080022	0.144940446785752	0.00615362712208753	0.0644186891538792	0.0227824895280797	0.640072504859322	0.919391893713278	0.0310703546848679	0.651990605314035	0.961908402803328	-0.0144936730380252	0.833082243161526	0.99986486487325
ABCF2	0.0141779761021823	0.631838486220685	0.825219876675834	-0.0191998625883922	0.517309749173698	0.87140169843282	-0.0332522406203193	0.266430713218816	0.559282571631243	0.0149638163550625	0.61317044274701	0.913428254449085	0.0474302167225016	0.262449874831462	0.833002646173203	-0.0341636789434547	0.416493480526627	0.99986486487325
ABCF3	-0.113173602560155	0.00167709861617621	0.0212064706598071	-0.04137137570389	0.206613154584665	0.614991709194445	-0.0623519235050995	0.0623567112995162	0.252953987162664	0.0367310697347882	0.260426822688036	0.716385199381846	-0.0508216790550557	0.27060100842086	0.834314180823054	-0.0781024454386783	0.0961282904697044	0.99986486487325
ABCG1	-0.130645791403007	0.106971199811964	0.315045427579825	0.155891576190854	0.0572294152904404	0.335217358916972	-0.0467215465025692	0.554473862772084	0.795535058411426	0.0447860924724859	0.570877113131586	0.900404221568606	-0.0839242449004383	0.453860118337548	0.91958586068392	0.111105483718368	0.323616140137985	0.99986486487325
ABHD10	0.177852069650877	0.0106297081293125	0.0751666630777726	0.167400757850965	0.0154040209682419	0.168218910800915	0.102834315975982	0.121613038015657	0.372764746970335	0.125533462982724	0.061933633173683	0.431917427285264	0.0750177536748948	0.415595970668625	0.905610447445428	0.0418672948682408	0.64794144702677	0.99986486487325
ABHD12	-0.286642653311233	0.000278893211360964	0.0059958920831742	-0.16932941361155	0.0187912160442601	0.184268965495244	-0.437284160790789	1.13703377532155e-06	0.00017624023517484	0.00464799439331642	0.945295382518935	0.993335287146784	0.150641507479556	0.125489107997415	0.72849829958908	-0.173977408004866	0.0792604082111194	0.99986486487325
ABHD14A	0.111927468309276	0.00235081141487826	0.0270243946648771	-0.0248135894608073	0.456493237640435	0.83639657077685	0.0108388125360408	0.743763850838766	0.897561631567835	0.00793969683387541	0.810661284400029	0.970116160496968	0.101088655773236	0.0395490667125867	0.555551253818545	-0.0327532862946827	0.486707029101199	0.99986486487325
ABHD15	0.211262860365165	0.00189538885942086	0.0231739019580592	0.049786549608811	0.41730822878546	0.805934903261308	-0.00672216346656107	0.912173580976735	0.971085422974014	0.0642822755581829	0.297272555763076	0.748442958261694	0.217985023831726	0.0175822914009447	0.437735285914712	-0.0144957259493719	0.866463144240778	0.99986486487325
ABHD2	0.31166294253689	0.00115457906877787	0.0163892242997863	0.230377063594136	0.011639397539075	0.14230866456808	0.191373561558277	0.0324279375703734	0.171226637390818	0.0705875308961099	0.409805850337208	0.822006725472881	0.120289380978613	0.322223813915598	0.86159317323027	0.159789532698026	0.192078577560975	0.99986486487325
ABHD3	0.135775095203103	0.152809478481684	0.387633764872276	-0.179550418612337	0.0627779400066952	0.351366338651334	0.0466786842441582	0.616097253776396	0.834611386949271	0.0738912709914157	0.429280974068135	0.833030006356319	0.0890964109589447	0.499559209472957	0.931314493065006	-0.253441689603752	0.0632412947493993	0.99986486487325
ABHD4	0.026043436390613	0.603834412722085	0.809775147398721	-0.0942019416469542	0.0695713133249996	0.370120752478737	-0.074271403992352	0.147060582288543	0.414321957136586	-0.017448472325631	0.72767937933267	0.947689230978041	0.100314840382964	0.165269614038403	0.765040738448129	-0.0767534693213232	0.284215309691628	0.99986486487325
ABHD5	-0.00197848703342984	0.979906082265441	0.991565489161934	0.0703782463881417	0.374447357556637	0.774024329128691	-0.00253943181839311	0.974210894335112	0.991649898798901	-0.0628823195144186	0.426640569693433	0.831897683599184	0.000560944784963269	0.995971127645028	0.999996910684304	0.13326056590256	0.237521454758978	0.99986486487325
ABHD6	0.158430544934724	0.0129905848209793	0.0854479946130127	-0.0383933350810413	0.52067151050812	0.871592217065222	0.0273656278169323	0.646348209795765	0.850635976776356	0.0139467949401233	0.814792379912105	0.970862527580791	0.131064917117792	0.128964932345719	0.736832936886062	-0.0523401300211646	0.535674843406831	0.99986486487325
ABHD8	0.0423636528359115	0.460172645419103	0.708241371312873	-0.132856232152761	0.0273469095585617	0.229522970181465	0.0783753602816049	0.177894205779811	0.454671095091484	0.0478302238154207	0.405122949440954	0.819706876539915	-0.0360117074456934	0.655856768818224	0.961908402803328	-0.180686455968182	0.0331720355575002	0.99986486487325
ABI1	0.195807357659266	0.00166998912931719	0.0211901730694927	-0.0155684487016519	0.779878230588059	0.963308419493179	0.161608318660495	0.00741025579314676	0.0717145600927899	-0.223940499278717	0.000471685368748867	0.0319218055892719	0.0341990389987714	0.664589231874101	0.962457945507474	0.208372050577065	0.0134542972072596	0.99986486487325
ABI3	0.173486768058228	0.0551492203564595	0.21301608023536	-0.0824987574134832	0.346774797255587	0.753363895952009	0.0775635662284122	0.37584964112786	0.667513408101781	0.00653093212144373	0.940048178275938	0.992553573918895	0.095923201829816	0.437763351341458	0.912254209872544	-0.089029689534927	0.470991363308506	0.99986486487325
ABL1	0.0692296552769989	0.0644594036985072	0.233294281838337	-0.0485180626206061	0.18670536944195	0.586477958178987	0.0045919257372784	0.898639865560227	0.965753996374504	-0.0170577863637398	0.636851078874292	0.919391893713278	0.0646377295397205	0.21258667984103	0.79757767520065	-0.0314602762568663	0.538790891231137	0.99986486487325
ABL2	0.0684286570048114	0.089583638091715	0.282539797197697	-0.00353133812569784	0.92792881757192	0.991780572242055	0.140849989803616	0.00133585487401102	0.0247801895062118	0.0200888560153478	0.60787561428394	0.912936363271799	-0.0724213327988048	0.197772955574329	0.790390655783114	-0.0236201941410457	0.669392257084367	0.99986486487325
ABLIM1	0.0194530018167836	0.722263956868167	0.876956836784264	-0.00038395309690209	0.994394792684566	0.999008695889697	-0.0766438794921802	0.169645454947966	0.443931281852838	-0.0203732949136723	0.709744109981786	0.942718025921284	0.0960968813089638	0.221372919992626	0.807360061149579	0.0199893418167703	0.796075727476449	0.99986486487325
ABP1	0.0503737145978693	0.765621714718303	0.901416235009356	-0.042514639797564	0.801297524973645	0.967395630024715	0.0658258250109647	0.697067560317929	0.875197253517682	-0.235106067585655	0.172481603246749	0.633289894452984	-0.0154521104130954	0.948396117697861	0.993430318638325	0.192591427788091	0.423122584456731	0.99986486487325
ABR	0.0330167011951374	0.506007541131871	0.744561701160202	-0.128693753238746	0.0148179982313109	0.164380273756947	0.0312026604490185	0.529446300437808	0.779766888460894	-0.0499288839919334	0.317523660473943	0.7644847763836	0.00181404074611891	0.979285750156015	0.999251867720079	-0.0787648692468128	0.266110557678435	0.99986486487325
ABRACL	-0.0123230919942969	0.868956984846477	0.947110427322996	0.276398336910551	0.00105810224749878	0.0303533211894427	0.0070052788083661	0.925262644079914	0.97574618913195	0.216895178473454	0.00739134690897682	0.161801466504026	-0.019328370802663	0.85482445962662	0.988337227267625	0.0595031584370975	0.574441323892502	0.99986486487325
ABT1	0.0674557249311141	0.0276919102356224	0.139402439687968	0.0127235586502268	0.661741155976129	0.930225815408019	0.0027408007704075	0.924764096403829	0.97574618913195	0.0368411857030262	0.212103492414565	0.67290723260877	0.0647149241607066	0.1245203945636	0.727837656626686	-0.0241176270527994	0.558258674466019	0.99986486487325
ABTB1	0.00738839250947976	0.899005497644902	0.959511642866227	-0.0149554746933696	0.797360823479827	0.966847040304645	-0.0868346850270587	0.145063637708669	0.410311703968159	-0.0944364130232476	0.114507020818106	0.54611040697866	0.0942230775365385	0.259028085965061	0.829476809771488	0.079480938329878	0.339118946500418	0.99986486487325
ABTB2	-0.0388918060694072	0.671966949404526	0.849122088221323	0.0230925131744382	0.801234159664676	0.967395630024715	-0.284286625456454	0.00462376322629628	0.0531511538333819	-0.0966209851253801	0.297633453798248	0.748442958261694	0.245394819387048	0.0681310217158834	0.643678752549092	0.119713498299818	0.360196838631737	0.99986486487325
ACAA1	-0.0059700555767126	0.935093008833214	0.971906101545229	0.124053039759414	0.100510426922059	0.439447316979519	-0.0662258982985477	0.370516421504331	0.662818840405179	0.0486948153146436	0.508540379453772	0.873945569165808	0.0602558427218352	0.562512324775644	0.943958924422205	0.0753582244447699	0.469822455665326	0.99986486487325
ACAA2	0.0123079630882916	0.888790132827362	0.955862265503032	0.0451795931952397	0.608698284010502	0.914856194767114	0.0934331916063833	0.294210939415549	0.589384499020867	0.103277761296336	0.247516723955402	0.702545730030408	-0.0811252285180917	0.516430047732873	0.935998803766539	-0.0580981681010968	0.641408908143868	0.99986486487325
ACACA	0.11306448713574	0.183774698664892	0.431803142828757	0.0366305741321478	0.661225017374097	0.930225815408019	0.129474577927984	0.130208983379654	0.386922798478191	-0.038895463085411	0.64179319237057	0.919391893713278	-0.0164100907922435	0.889384855474249	0.992978763210073	0.0755260372175579	0.523869588688332	0.99986486487325
ACACB	0.0757658422881171	0.131887099769841	0.354271372569677	0.0492062127761548	0.320891209887865	0.734350919167419	0.00445614714441511	0.92759722297206	0.976364656381325	0.0442495885675109	0.371069298693745	0.801162875858659	0.071309695143702	0.309323884654169	0.854473008794837	0.00495662420864385	0.943021704148936	0.99986486487325
ACAD10	-0.064969694741289	0.173190204723616	0.416202307534653	0.0236177908048152	0.614266971701231	0.917058505211874	-0.0266214659822879	0.570264699950469	0.803666594125106	-0.00490922130133864	0.9163431773149	0.989756711036789	-0.0383482287590011	0.563171916655617	0.943958924422205	0.0285270121061538	0.666629955689064	0.99986486487325
ACAD11	0.0207014936523251	0.685877029071605	0.857904236545377	0.0198035809649735	0.698776557328218	0.941702630840538	0.103146136605078	0.0528452882358842	0.228039164771822	0.0861388280561783	0.10172596343358	0.518888804987636	-0.082444642952753	0.260513239639843	0.830612389194996	-0.0663352470912049	0.362962612560819	0.99986486487325
ACAD8	0.000700014682707639	0.986582238184224	0.994759763818108	0.0313342788262574	0.454364320552326	0.835384989267815	-0.0121079555150327	0.771343887627329	0.912008839948744	0.0453516382095254	0.282058016519351	0.738576986035684	0.0128079701977404	0.827844195763733	0.984739698165964	-0.014017359383268	0.81189884942716	0.99986486487325
ACAD9	0.132131055817837	0.0220951340345952	0.121891066631722	0.0182857587534571	0.737259522934107	0.952933963066143	0.0856953251873769	0.125122408054092	0.379398833651523	0.0328656398458769	0.547623331795767	0.888588549680438	0.0464357306304599	0.547993515465348	0.938369605211237	-0.0145798810924198	0.849852617937522	0.99986486487325
ACADM	-0.154547498402913	0.157009843565711	0.39302882179743	0.26434888636172	0.0198657458262541	0.191100918308611	0.0718422171253277	0.503292973446414	0.760890059899944	0.130995645356704	0.227486832116872	0.686604414774855	-0.22638971552824	0.143303907786465	0.745655062372559	0.133353241005016	0.381349415498258	0.99986486487325
ACADS	0.0108257900471127	0.749957147969308	0.892518661546137	0.0265657400872463	0.436729885575689	0.822344463594237	-0.0382417402104007	0.266246223887496	0.559018180371168	0.0088767248357664	0.793773420038393	0.965834713417189	0.0490675302575134	0.311986504096442	0.855403795825052	0.0176890152514799	0.712812927620669	0.99986486487325
ACADVL	-0.0405911113734412	0.553018129985308	0.774654770772717	0.146997835482663	0.0396730223009942	0.283885140962438	-0.0640167378421417	0.352207493398186	0.646184423741231	0.0918899945161424	0.186053341454671	0.645244536766289	0.0234256264687005	0.808103234311017	0.981343628585648	0.0551078409665209	0.568894017328739	0.99986486487325
ACAP1	0.0286105319216565	0.465938173262732	0.712663671025761	0.0429466557816882	0.277211852301187	0.692458242496746	-0.0255536256974818	0.51442127071237	0.767686644045022	0.0938772123195051	0.0231344147435703	0.285333974799137	0.0541641576191383	0.331258983257689	0.869875664795796	-0.0509305565378169	0.360367718815132	0.99986486487325
ACAP2	-0.0677947523016709	0.0729109456773002	0.251317857947939	-0.0269616127252466	0.462441857661504	0.839929361581374	-0.0811837450995876	0.0342559421737535	0.176823570331547	-0.030848024567506	0.401340669168251	0.818518562723892	0.0133889927979167	0.795340826086046	0.979615265365983	0.00388641184225946	0.939942961183607	0.99986486487325
ACAT1	0.248467099747325	0.00216152717280277	0.0254562207483267	0.0399409475175663	0.584430024634206	0.903244216264831	0.157459496104458	0.0391301016426849	0.190165699524675	0.13457218301134	0.0743515984013426	0.465514058440422	0.0910076036428666	0.380683074473994	0.89468435942653	-0.0946312354937735	0.362334792196985	0.99986486487325
ACAT2	-0.46225951428889	0.0248730897750804	0.131988068878256	0.268794578284751	0.176227678839283	0.572337949863303	-0.456791915076757	0.0264510696564694	0.151667529474147	-0.268465703947911	0.17673655651187	0.637472619322839	-0.00546759921213358	0.984162175848598	0.999753086548426	0.537260282232662	0.060706208523878	0.99986486487325
ACBD3	0.0610026892729643	0.201678023472197	0.454638941019896	0.0986259137841081	0.0445162871335659	0.300784490861411	-0.0233399566011059	0.61985642695725	0.836867134456192	0.0627848637270407	0.189275678052679	0.648019219342594	0.0843426458740701	0.211585802563597	0.796894027411416	0.0358410500570674	0.590318198868116	0.99986486487325
ACBD5	0.0479179413941138	0.32337386814033	0.587299598053572	-0.0585701368063081	0.22981216484445	0.642667436679596	0.0798411287539791	0.106151763624755	0.346601947810925	-0.0441803670287344	0.361784939538956	0.793330448556105	-0.0319231873598653	0.63898977697058	0.961674799060208	-0.0143897697775737	0.832211331922857	0.99986486487325
ACBD6	0.0321066689751257	0.423299913793022	0.68139232354287	-0.0728741774472539	0.0771025152028694	0.389361624329782	-0.0473592630344148	0.241374795765209	0.532572306654556	-0.0961443256367494	0.0227111082972495	0.282712112353067	0.0794659320095406	0.167048676202171	0.765393766352012	0.0232701481894955	0.679974795858192	0.99986486487325
ACCS	0.31570024883725	2.37630456412605e-06	0.000170420051203368	0.0267072661583203	0.604114913736982	0.911514986692275	0.149884985570125	0.00715442718550132	0.0703252815321157	0.0891634949913049	0.0924977510677376	0.503664442609983	0.165815263267125	0.0302946603032055	0.510487798272007	-0.0624562288329846	0.393633559689186	0.99986486487325
ACD	0.024308148372608	0.635382928490463	0.82795039295166	-0.0315307977865817	0.539201873726271	0.879516819948449	-0.0218612890520147	0.669644524567745	0.861538084562099	0.0136528036924606	0.789647770309485	0.964927222882033	0.0461694374246235	0.525061506054368	0.936324898971781	-0.0451836014790423	0.533870891434379	0.99986486487325
ACER2	0.108242658968401	0.00068165365891669	0.0115329078559672	-0.0208873993862211	0.457105672930926	0.83666011384682	0.0307381547030383	0.277152578112022	0.572086323657489	-0.00245009741966751	0.930072988238924	0.991389247825381	0.077504504265363	0.0592042189285218	0.614676564436482	-0.0184373019665536	0.641312367810105	0.99986486487325
ACIN1	-0.171761359913283	0.00424645008355828	0.0402053057172365	-0.0252922474468633	0.644934808139518	0.926243332844475	-0.131154727152598	0.0237157875786596	0.141822475812644	-0.0135998827677977	0.803984450733447	0.968261016872398	-0.0406066327606851	0.601122508650367	0.95232233895978	-0.0116923646790656	0.880016367099759	0.99986486487325
ACN9	0.185214134129461	0.00040526274490983	0.00774269379440052	0.065715604945046	0.156467166324076	0.543022691783494	0.0368161973502596	0.420267920035032	0.700325075695623	0.00462554810799976	0.918775738360684	0.990179975961217	0.148397936779201	0.0283483984454658	0.497131585877603	0.0610900568370463	0.345610487374184	0.99986486487325
ACO1	0.663534838814932	8.21922356613063e-05	0.00249958033134542	0.0391595945102861	0.780978911043795	0.963308419493179	0.565082530692647	0.000481147241105155	0.0129518907199455	-0.160552277183244	0.260555068950178	0.716433251104781	0.098452308122285	0.621736757936347	0.958282316562678	0.19971187169353	0.320868577316544	0.99986486487325
ACO2	-0.0555254723304621	0.478489745906229	0.723683735939386	0.195208925242405	0.0185543534226787	0.183067080484541	-0.0793884147787622	0.313652172955852	0.60868283160455	0.122149755860251	0.126585234137296	0.564801357919288	0.0238629424483001	0.828627966500617	0.984739698165964	0.0730591693821534	0.509324829800597	0.99986486487325
ACOT1	0.128321517526997	0.0768658548446001	0.259476483370707	-0.0175802012180721	0.801971807650188	0.967723389191149	0.126742525449437	0.0803243687365544	0.295259181058572	-0.018966206920183	0.786746472726002	0.963905624649444	0.00157899207755996	0.987283051533959	0.999753086548426	0.00138600570211089	0.988837217156664	0.99986486487325
ACOT11	0.228121366614824	1.05938802141729e-08	2.48310216727321e-06	0.107595647054184	0.000460580548866986	0.0174259018685502	0.0052749236014602	0.843331294010877	0.943580595580921	0.00171629835485199	0.948708406478021	0.993489702873673	0.222846443013363	4.2557497480645e-06	0.010224438769725	0.105879348699332	0.00931397085019809	0.99986486487325
ACOT13	0.0250477308358743	0.721637568089335	0.876841527081929	0.134834201453947	0.0644913775974946	0.357211607326757	-0.00332962442191231	0.962174831571548	0.987670805952341	0.022264089154632	0.751418002320411	0.954652770036284	0.0283773552577866	0.775220779126458	0.977425817587417	0.112570112299315	0.263476372790368	0.99986486487325
ACOT2	0.0613889259237776	0.129276401944616	0.350762822292791	0.0313496187884947	0.429957813797811	0.817873038518796	0.0338812508677577	0.394197712155845	0.682843382289008	-0.0577288763681922	0.152549313247751	0.606807434478898	0.0275076750560199	0.622886837442194	0.9584132271009	0.089078495156687	0.120072280269038	0.99986486487325
ACOT4	-0.0481032155015546	0.340040031386396	0.603580476842125	-0.00856744030597589	0.863760916879547	0.984304138080022	0.0588751225119815	0.245215081824654	0.537404090384248	0.00644829224520116	0.897227473914975	0.98642616300399	-0.106978338013536	0.139093464145275	0.743848507325781	-0.0150157325511771	0.831627351180205	0.99986486487325
ACOT7	-0.127843755320839	0.305219034686675	0.570319837320424	0.0879136292816618	0.478103782290474	0.849117972243846	-0.132598219344462	0.2879995630662	0.583036823481394	0.181037409293566	0.151090254446348	0.605998255394541	0.00475446402362323	0.978238627733736	0.998979227816046	-0.0931237800119042	0.594306777828647	0.99986486487325
ACOT8	0.0422780303649635	0.156636773712426	0.392306331867713	0.0155487785434003	0.595414354611345	0.907476280921734	0.00384620097807087	0.895193832991008	0.964270362851269	-0.013167572786748	0.6526530596079	0.922002045787489	0.0384318293868926	0.356395607474041	0.885737655784642	0.0287163513301483	0.488968984302217	0.99986486487325
ACOT9	-0.246691224541431	0.00343997781155311	0.034945229142733	0.0523177868446911	0.496383088542358	0.862455519958788	-0.0683748928559496	0.37572835029395	0.667513408101781	0.0909012234726738	0.241994622686729	0.699152596529616	-0.178316331685481	0.109285803455294	0.706278797044635	-0.0385834366279827	0.721824184168533	0.99986486487325
ACOX1	-0.177944053764538	0.033892093982238	0.158108263674421	0.155536317394445	0.0607919531203002	0.345484095602033	0.0555338802056902	0.488595074892402	0.752226637250238	-0.0758519116266321	0.346358909482907	0.780241237724035	-0.233477933970228	0.0475859581103331	0.59235888269469	0.231388229021077	0.049443680125393	0.99986486487325
ACOX2	0.44367960188944	0.000606643390077852	0.0105632424546363	0.175256603521054	0.130772218872879	0.499293215482071	0.0154214800081274	0.89154634485771	0.962812737006109	0.0318191143901041	0.778603767426031	0.96321192710119	0.428258121881313	0.0125402056682259	0.389743293132652	0.14343748913095	0.373928580366785	0.99986486487325
ACOX3	-0.0105479651997396	0.876161033050112	0.950078235200526	0.0445842409010986	0.511980748429378	0.869407850482946	-0.0725476193543706	0.28963738405749	0.584382796723175	-0.0322323247180787	0.634679554379769	0.918980038811147	0.061999654154631	0.518981621543286	0.936324898971781	0.0768165656191773	0.425389628197967	0.99986486487325
ACP1	-0.00712830914884321	0.909094168239304	0.964108957345951	0.0606711998555998	0.33600585258889	0.744831091763926	-0.107466944887149	0.0950872325086544	0.326936781541384	0.0803408950724762	0.206048409871407	0.666458250006677	0.100338635738305	0.262304059928915	0.833002646173203	-0.0196696952168764	0.823770728281666	0.99986486487325
ACP5	-0.283590819071767	0.0697936640674879	0.24490787451852	-0.265828724393909	0.0878489028814774	0.413573480586392	-0.323189985711885	0.0407951610413259	0.194369574911267	-0.202234669974144	0.188236721867834	0.647359184767918	0.0395991666401176	0.852727154565725	0.98807824226868	-0.0635940544197648	0.76574198418302	0.99986486487325
ACPL2	0.109895774414104	0.208726615553895	0.464105223385685	-0.179493429700636	0.0456824585624737	0.304334439088751	0.212352392879112	0.0200030584718114	0.129621977015581	-0.428658763704059	4.11762403549921e-05	0.00867677587482682	-0.102456618465007	0.402679598504122	0.902574651984554	0.249165334003424	0.0494746911159933	0.99986486487325
ACPP	-0.0302375380853253	0.52534549468009	0.758271283249574	-0.0191396448609336	0.686882157581331	0.938299578444434	-0.0147643946392293	0.755671420245483	0.90390302286727	0.0256242679749343	0.589956869968428	0.906362583238876	-0.015473143446096	0.817545200826991	0.982936241704915	-0.0447639128358679	0.506322544985234	0.99986486487325
ACPT	-0.0260694266624899	0.479651281097309	0.724638247857029	-0.0143181748528551	0.696740244757252	0.940914231508375	-0.0565265414464173	0.132834485418774	0.390857135601474	-0.0173354428526382	0.637294288566966	0.919391893713278	0.0304571147839274	0.55856867115107	0.942466872618859	0.00301726799978308	0.953615345693155	0.99986486487325
ACRC	-0.401476115586781	1.59814220215055e-09	6.1432586250667e-07	-0.0158727119530742	0.708149316188236	0.944526707643157	-0.174613196656834	0.000365714658495143	0.0110519429815671	0.0111301463645388	0.792782152811776	0.965598989473254	-0.226862918929947	0.000850092489005674	0.154139411685746	-0.027002858317613	0.652708877411486	0.99986486487325
ACSF2	0.241187120706648	0.000551096046534869	0.00984392752267675	-0.0996803341983803	0.111404421617907	0.465782428134162	0.119204258155883	0.05980339154562	0.247187351721896	0.0823226092984006	0.184790072239185	0.645016103604148	0.121982862550765	0.165459223183306	0.765040738448129	-0.182002943496781	0.0434030571358707	0.99986486487325
ACSL1	-0.155928863986842	0.20287402327342	0.456051313136273	0.182069881222024	0.139514871268177	0.514283817754959	0.0937713780337521	0.438623264745775	0.716889703880267	0.0413657927139859	0.73123061084824	0.949226822943615	-0.249700242020594	0.151311473354288	0.751829222527853	0.140704088508038	0.411587998654288	0.99986486487325
ACSL3	-0.0935546399617664	0.191888724829034	0.442006386770617	-0.139014520151306	0.0576631832587736	0.336456096610088	0.0180193031103109	0.797985673221586	0.924936817434241	-0.0207975963588556	0.767727692942338	0.960418496213475	-0.111573943072077	0.268555591441251	0.833907095609008	-0.118216923792451	0.241850794067244	0.99986486487325
ACSL4	-0.0453555025673573	0.587569841559822	0.79888931164268	0.0770961833830128	0.359470311242082	0.764779652653621	0.188587888527605	0.0316686167863205	0.168700336649967	-0.110935913111881	0.191559544409836	0.650048659137739	-0.233943391094963	0.0566772118867494	0.6077462966736	0.188032096494894	0.120435868195024	0.99986486487325
ACSL5	0.0262357932055481	0.80683174001964	0.921422350173314	-0.0965960313912886	0.371875223745022	0.773054488326277	0.133535565723299	0.220628902820408	0.507752305614373	-0.132783500682638	0.223155492444639	0.681646327560334	-0.107299772517751	0.481596615103469	0.924972657443937	0.0361874692913497	0.811501569066734	0.99986486487325
ACSM3	0.0120421639192791	0.594112563763928	0.802787083488659	-0.00547282334608212	0.808173666295224	0.968955835930438	0.0223907362409079	0.325423292440593	0.620376480927217	0.0109959321001654	0.626371467792913	0.917601717143069	-0.0103485723216288	0.745595898582432	0.972421814161707	-0.0164687554462475	0.606257998942549	0.99986486487325
ACSS1	0.0246027831810149	0.329435064582324	0.592271416168511	0.0320433836148943	0.207233995937205	0.615853731359975	-0.0374685015488874	0.142757718900414	0.406609863258143	-0.0100679552476803	0.687251726765939	0.937111588680627	0.0620712847299023	0.0886720507637633	0.67129479084486	0.0421113388625747	0.240090320054333	0.99986486487325
ACSS2	0.169210876948195	0.00508383601170618	0.0454296166064906	0.0422664067096967	0.447274432415488	0.831394061027628	0.194880251314826	0.00163583186832975	0.027883841306318	-0.0121707614659936	0.825780878646856	0.972425065994447	-0.0256693743666307	0.742867581817387	0.97215053525247	0.0544371681756903	0.488395374652492	0.99986486487325
ACTA2	0.196652549686236	0.291554012516216	0.55571104583737	0.256104446622018	0.17311246363908	0.569174212235854	-0.00453703109778303	0.980346496085777	0.994209563886061	0.319929436689142	0.0923261315480147	0.503549446184121	0.201189580784019	0.442819681539353	0.913645569389554	-0.0638249900671237	0.806544646148547	0.99986486487325
ACTB	-0.0259483803673284	0.512065753714925	0.748803282651995	-0.0143758040860593	0.715546037457177	0.945355624943217	-0.011417678587998	0.772132071852466	0.91232433187062	-0.0545990728272301	0.174448904715605	0.634793122296542	-0.0145307017793304	0.79436634361012	0.979615265365983	0.0402232687411708	0.472785552855465	0.99986486487325
ACTG1P4	-0.0322195401897281	0.235570687065537	0.496781721022562	-0.0105941027746965	0.692513405831094	0.939900935776228	-0.0493955282183212	0.0746240276797645	0.280679806654613	-0.00734563215255069	0.783749880980945	0.963445192519344	0.0171759880285931	0.650475167313231	0.961908402803328	-0.00324847062214584	0.931560554370633	0.99986486487325
ACTL6A	0.313127761764951	0.00123051393954984	0.0171878473242354	0.0876445209670127	0.313570330572113	0.726202680735765	0.0984321227865923	0.259083077210609	0.55169252647772	0.046631198429683	0.588863796988456	0.906154373086148	0.214695638978359	0.0874758982995633	0.67129479084486	0.0410133225373297	0.73626837699911	0.99986486487325
ACTN1	0.0983595939610193	0.50985533386283	0.747138539981257	-0.0669664053462888	0.65281058965278	0.928199582378407	0.358045270592015	0.0229204990314309	0.13914465931273	0.114603562714871	0.443315158965673	0.840208754100277	-0.259685676630996	0.223897992034742	0.811269043515939	-0.18156996806116	0.391210772757235	0.99986486487325
ACTN4	0.00664785808232793	0.952821752642648	0.977853165623221	-0.0702184178831047	0.533755932735366	0.876669716900849	-0.108774984829665	0.337896183069709	0.633349389369983	0.053918347047432	0.632177744747016	0.918762051799711	0.115422842911993	0.470159495670127	0.923122082553399	-0.124136764930537	0.437718235568847	0.99986486487325
ACTR10	0.0340378212886581	0.613857567601607	0.815904364568205	-0.150297486492736	0.033645426025248	0.260752051695672	0.0399378705201343	0.55424199117703	0.795434744058653	-0.143965096826433	0.0410856379446005	0.371983176023117	-0.00590004923147625	0.950550075127348	0.993823345726689	-0.00633238966630323	0.946932017865971	0.99986486487325
ACTR1A	0.0492649189259549	0.622176948671848	0.820979579760831	-0.0761802193746952	0.44774189876592	0.831492675428773	0.0782037908002913	0.435928148637448	0.715507538599655	-0.166785385038008	0.104290734802997	0.524812547842143	-0.0289388718743364	0.837469823608286	0.986526722833492	0.0906051656633124	0.522397381068278	0.99986486487325
ACTR1B	0.319677882929124	4.79875873776054e-05	0.00170369075737731	-0.00221209586804783	0.972792202495593	0.997361370501668	0.197155405033605	0.00536024821989542	0.058469903965034	0.0362662130352991	0.577351831853148	0.902758070958144	0.122522477895519	0.189983479750557	0.787987546567358	-0.0384783089033469	0.675436256489255	0.99986486487325
ACTR2	-0.011433177380356	0.86910510952234	0.947110427322996	-0.164272402843809	0.0251482006667105	0.219537074071962	0.00129335486607651	0.985122204108065	0.995795138474651	-0.0619125349770808	0.376168334124124	0.803836969527478	-0.0127265322464325	0.896784324547401	0.992978763210073	-0.102359867866728	0.302362387480318	0.99986486487325
ACTR3	-0.00464010737088927	0.965100654518618	0.984567507643565	0.133308918390004	0.216462555642782	0.628496718219762	0.162761079824033	0.134368815008175	0.39288084718626	0.0639879486246393	0.547847221397527	0.888588549680438	-0.167401187194923	0.270752329069124	0.834314180823054	0.0693209697653643	0.644700711935542	0.99986486487325
ACTR3B	0.0361615795401296	0.0971039500119905	0.297698862751637	0.0310772097562513	0.150769617423507	0.532486594428482	-0.0122695252513871	0.563084586052002	0.79963987232752	0.0309446077481725	0.152442746763709	0.606807434478898	0.0484311047915167	0.115044808402486	0.718489316480426	0.000132602008078742	0.996461056997426	0.99986486487325
ACTR5	0.0196572512301776	0.478035768757203	0.723452557127043	0.0401860330820698	0.153882771650855	0.537750340205352	0.0121878914605684	0.658936058108397	0.857749049334735	-0.0385262274610962	0.170853964283828	0.632554760212281	0.00746935976960916	0.848050105236535	0.987766504626882	0.078712260543166	0.0527244578775018	0.99986486487325
ACTR6	-0.0568342610776114	0.319845844391879	0.584483784514933	0.10455507325722	0.0741588718926785	0.382858239251656	-0.0193302354551186	0.732638820942224	0.891972140558235	0.0968856200119124	0.096400095580405	0.509092819473785	-0.0375040256224928	0.639684651507688	0.961793626680777	0.00766945324530788	0.923556549661705	0.99986486487325
ACTR8	-0.0648788251633752	0.0502298505261099	0.201847095290328	0.0430852779194559	0.183270364532189	0.581263433384271	-0.0374793442630361	0.244826719922749	0.536920305444459	0.028166870120482	0.37904197562715	0.80481515372888	-0.0273994809003391	0.543333990791913	0.938369605211237	0.0149184077989739	0.739987936940365	0.99986486487325
ACTRT1	0.00352542335813588	0.946875075978055	0.97497797922952	0.0108234950491468	0.837976106324133	0.97920116509909	-0.0361361027822946	0.496790728536522	0.75635263984614	-0.0274042085650201	0.605538088327108	0.912565146764001	0.0396615261404305	0.597183689611858	0.951389322115621	0.0382277036141669	0.610429031242016	0.99986486487325
ACTRT3	0.0250017907584095	0.355390157056707	0.61920333117783	-0.00871543855508605	0.745303563491635	0.953909462230465	0.0829375067981859	0.00469773386836964	0.0536848032280057	-0.0435505663737343	0.113964479638925	0.545667392786857	-0.0579357160397764	0.135853272217963	0.743056315318512	0.0348351278186483	0.362416883745502	0.99986486487325
ACVR1	-0.0691649997516777	0.397089249427971	0.658280863278919	-0.0190751392086117	0.814006236047734	0.970405417780114	-0.0207871357789209	0.797683409602814	0.924920073151911	-0.061810375343736	0.448464273950838	0.843063707485829	-0.0483778639727568	0.673509201502006	0.964737431276536	0.0427352361351243	0.709630095301101	0.99986486487325
ACVR1B	0.142559305970744	0.0430036991755032	0.184164683189209	0.014307237789728	0.831721675992203	0.977810191894868	0.217261325594784	0.00340053938299135	0.0442208166042583	0.136793327241273	0.0513664014069472	0.408204471817612	-0.0747020196240396	0.435583496802841	0.911710649864412	-0.122486089451545	0.206077204827723	0.99986486487325
ACVR2A	-0.00337147973579377	0.927696001724126	0.969846854065424	-0.0833019922416147	0.0330710017513802	0.257899747475645	0.0260267744026637	0.485903694461884	0.750388241597329	-0.0868322277087499	0.0269239726552751	0.307900275065951	-0.0293982541384574	0.577088887398882	0.945740826722929	0.00353023546713516	0.946430542418293	0.99986486487325
ACYP1	0.137458785155005	0.000450363660908918	0.00840387336181496	0.0440992768978905	0.202792140187376	0.610345276292103	0.0647248233634006	0.0667628674357489	0.263487127744373	0.0431605607180057	0.212235361294192	0.67290723260877	0.0727339617916041	0.139896706403295	0.745479849914321	0.000938716179884835	0.984428078227328	0.99986486487325
ACYP2	0.0508377763844789	0.326105537578305	0.590317020395699	0.0544667929555951	0.293504451361598	0.708154099318341	0.00976658171370737	0.848842231760419	0.945770661669323	0.0752901664017376	0.150822802265004	0.60568303890267	0.0410711946707716	0.5720816752972	0.94537954379746	-0.0208233734461434	0.773958253532628	0.99986486487325
ADA	0.198593498947513	0.286669094899882	0.550207709604127	-0.0565746919246326	0.758815533919952	0.957343885383282	-0.148745245390305	0.422335798239293	0.702188065930727	-0.282009349920701	0.135023164895369	0.579143246813944	0.347338744337819	0.190458274072548	0.788924143895339	0.225434657996068	0.390345644311616	0.99986486487325
ADAL	0.135050529016098	1.28522539093679e-06	0.000107400139190457	-0.0137818839557404	0.515370998091195	0.870535929235885	0.0490801320261429	0.02751354317702	0.155127289790656	0.00789964189555459	0.708385579481165	0.942718025921284	0.0859703969899552	0.0077853604489328	0.347342551892039	-0.021681525851295	0.469785082345371	0.99986486487325
ADAM10	0.0842895218476958	0.160045831389589	0.396708908860962	-0.0827344042092815	0.167567348685665	0.561389805931088	0.0652611931665996	0.272587935702974	0.566929057457988	-0.0383024893607935	0.516009155688825	0.877091280602926	0.0190283286810962	0.818796363588504	0.983001948684988	-0.044431914848488	0.593635429567265	0.99986486487325
ADAM12	-0.0672159354428077	0.226733748264883	0.486907557726375	-0.0317103216099799	0.563636455313123	0.894853186115828	-0.0140954142565883	0.796842225509545	0.924644750384019	-0.039031705442957	0.478051181716144	0.859949029650039	-0.0531205211862193	0.49460523959516	0.929985590395125	0.00732138383297709	0.924623468469269	0.99986486487325
ADAM15	0.100290872958706	0.271407859958619	0.533926209662708	-0.0512736937239957	0.570148232941655	0.898069909616343	0.052291213339771	0.562575794225873	0.7996351087435	0.12386773723724	0.177278704302098	0.638309609720181	0.0479996596189345	0.706449277058575	0.969420026894169	-0.175141430961236	0.177359536061943	0.99986486487325
ADAM17	0.0210564314463664	0.567006937996466	0.784132490163482	-0.114211095313699	0.00446070947399028	0.0804951423383239	-0.0112568688268349	0.758971693957291	0.90556091897284	-0.103160011610275	0.00913058177166779	0.181820292529034	0.0323133002732012	0.534728911270116	0.937589005012825	-0.0110510837034239	0.831240679678506	0.99986486487325
ADAM32	-0.319850795037594	2.69166987823705e-08	5.27896888364449e-06	0.00457297883736363	0.907696051443076	0.989788499500203	-0.391743712274503	6.66705764545285e-10	9.15291771040027e-07	-0.0105949481719865	0.788348974806356	0.964239995913082	0.0718929172369096	0.205361389010546	0.792579497345924	0.0151679270093501	0.785811317594096	0.99986486487325
ADAM8	0.0182253170930196	0.90720567277994	0.963555096752345	-0.131975949587115	0.402201584054792	0.795627258700401	0.0128578485959903	0.934454861165734	0.979099730483941	-0.111259489722976	0.479087831478329	0.859949029650039	0.00536746849702929	0.980631192559023	0.999295291593088	-0.0207164598641398	0.925352133833156	0.99986486487325
ADAM9	0.0905265915099864	0.451261580452205	0.70262861117072	-0.10898347671003	0.365786955730084	0.770278199649519	0.180442718927523	0.140225587747492	0.403342681309008	-0.0779505721032905	0.515882922791135	0.877091280602926	-0.0899161274175366	0.595590203580486	0.951389322115621	-0.0310329046067395	0.854263990885113	0.99986486487325
ADAMDEC1	0.0105339730559084	0.936057388773174	0.97238260794619	-0.0528119147567541	0.688031676824491	0.938864952530833	0.0276474220196876	0.833298131083531	0.942117063495616	-0.0582233662608758	0.658125886033244	0.923553079031531	-0.0171134489637792	0.926571925981933	0.993430318638325	0.0054114515041217	0.976749738960205	0.99986486487325
ADAMTS4	0.00668185192682724	0.830394384065841	0.932907415346356	-0.00821050557909508	0.792449483204565	0.964853074045792	0.0164795777717561	0.598243689963791	0.823750490440372	0.0104537962518956	0.737726045600004	0.951543851210987	-0.00979772584492888	0.824252218432985	0.98392442387499	-0.0186643018309907	0.672695639913789	0.99986486487325
ADAMTSL4	0.112152635321192	0.00664392401538069	0.0546625794282876	-0.0124792591097851	0.743040519936534	0.953774456264911	0.19901023116654	2.23362318330936e-05	0.00162614536300022	0.0147519359012245	0.698496349841674	0.941240713827452	-0.0868575958453484	0.116032002711547	0.718489316480426	-0.0272311950110096	0.613547833557664	0.99986486487325
ADAP1	0.143553250701064	0.0965841311432469	0.296869275170963	-0.127163291219951	0.138525643894498	0.512998627293304	0.0505816856780275	0.547618007367579	0.792322952544781	-0.118754098921453	0.165286327300558	0.626435012577411	0.0929715650230367	0.435725816725066	0.911710649864412	-0.00840919229849746	0.943422566701805	0.99986486487325
ADAP2	-0.109108674253388	0.185397460680003	0.434678229400325	-0.0522777724829329	0.519561958152133	0.871592217065222	0.0544487776462006	0.502533956226693	0.760647553841317	-0.139091566352731	0.0951419939786793	0.50682625395516	-0.163557451899589	0.161363807500722	0.759517807991395	0.0868137938697977	0.450285120447517	0.99986486487325
ADAR	-0.0946093797559655	0.346877203800891	0.61109631532792	0.017249101006966	0.862551279570944	0.984220343552621	-0.0227994947209087	0.819040073600591	0.936129294398392	-0.0371293640745236	0.709730357212246	0.942718025921284	-0.0718098850350568	0.611197435527062	0.956047724789926	0.0543784650814896	0.699919712670976	0.99986486487325
ADARB1	0.062516838309759	0.293313741630756	0.557725575202129	-0.000167275063859051	0.997728955012732	0.999301510874202	-0.0221276708319902	0.706963771452358	0.877871190215954	0.0859600510356628	0.152743723621691	0.606807434478898	0.0846445091417491	0.313885431167447	0.855816167022587	-0.0861273260995219	0.305671234180833	0.99986486487325
ADAT1	-0.0216748794678185	0.640270655114777	0.830925398392459	0.043957432539246	0.346813930873225	0.753363895952009	-0.000592732423558395	0.989779110425598	0.995999661277454	0.0233210899280545	0.615228855260481	0.915366047229173	-0.0210821470442601	0.747592276618096	0.972737367194891	0.0206363426111915	0.752742200223871	0.99986486487325
ADAT3	-0.00972071622718751	0.765326414177627	0.901416235009356	0.00217639507097367	0.946667072089848	0.995219526264554	-0.0371853726261575	0.259728695626743	0.552390376908599	-0.0137253195247728	0.673715907733462	0.930632438309411	0.02746465639897	0.55210613927742	0.939265290622648	0.0159017145957465	0.729973086754588	0.99986486487325
ADCK1	0.0993760569823454	0.00695195164511323	0.0564932003552686	-0.00701638005333827	0.836153101409792	0.97920116509909	0.0364620685690591	0.28825593717066	0.583432930962519	-0.0229354465773968	0.500946651499514	0.870278106198433	0.0629139884132863	0.197728978674413	0.790390655783114	0.0159190665240585	0.74022636751214	0.99986486487325
ADCK2	0.188067029527199	0.0377814807578701	0.16982227786863	0.017207769404882	0.841977977134811	0.980194879153666	0.0713971061855663	0.411412342790492	0.694235753154807	0.0285542307732118	0.74097113207888	0.952351555340114	0.116669923341632	0.343740925518903	0.87683395222007	-0.0113464613683298	0.925914885581417	0.99986486487325
ADCK3	0.141710829457914	0.0972404322800469	0.297780027625996	-0.0356732033102816	0.667521554330916	0.931853883951206	-0.011786902236441	0.886932498104448	0.961251980013956	0.0976460285162668	0.245742153009768	0.702016079198535	0.153497731694355	0.198491949795116	0.790390655783114	-0.133319231826548	0.261972352770943	0.99986486487325
ADCK4	-0.000708216871894152	0.982500249676919	0.992612631675482	0.00821889540197152	0.799209318748391	0.967236818907774	-0.0118161556776961	0.714792874781024	0.881062465981341	0.0436316762257816	0.185069019296168	0.645095776587539	0.011107938805802	0.807922013339735	0.981343628585648	-0.0354127808238101	0.441012017359484	0.99986486487325
ADCY1	-0.177844692294809	0.000209366594147834	0.00490734870673338	-0.0285265410538891	0.488123072001638	0.857756295859407	-0.202192425817231	4.66567742851783e-05	0.0025189415779807	-0.0743861294955392	0.0790639751381932	0.476156010901933	0.0243477335224211	0.674610587612889	0.965527518659088	0.0458595884416502	0.431339224526492	0.99986486487325
ADCY10	0.0106347882377218	0.601931305386089	0.808125152942207	0.0261120808977484	0.206890115560516	0.615546133293052	-0.041953731787876	0.0481590334814494	0.215460107894194	0.0633437337759801	0.0044611376420523	0.124856322889857	0.0525885200255978	0.0772407448889444	0.663901436844765	-0.0372316528782317	0.203309166619485	0.99986486487325
ADCY10P1	-0.233635249489859	4.69044316810383e-09	1.36591390440842e-06	-0.00703465440110396	0.787831972550979	0.964196216470821	-0.120319015476793	0.000108099830286049	0.00454723945904439	0.00749246672421044	0.774410206351558	0.962425602192334	-0.113316234013065	0.00501168959695405	0.307709416569056	-0.0145271211253144	0.694589702152529	0.99986486487325
ADCY3	0.372799280805417	0.0039789476747209	0.0384307111297338	0.124153064047192	0.297853818312377	0.712727085683285	0.315384829570341	0.0125843508426149	0.0999467864442388	0.33272329623159	0.00894499763181003	0.180019949844264	0.0574144512350756	0.730790003500762	0.971489026863056	-0.208570232184398	0.218415078746422	0.99986486487325
ADCY4	-0.138477609667785	6.95178780539089e-06	0.000373221680501712	0.0496133476557477	0.0501648362680599	0.317369372308134	-0.0574645865126175	0.0251926889589394	0.14744320395579	0.034175136548285	0.167970441614143	0.62933931858116	-0.0810130231551671	0.0256051006907147	0.484650436860983	0.0154382111074627	0.653583322302567	0.99986486487325
ADCY7	0.0890929804990623	0.352071454884218	0.616504501844904	-0.703163914634549	1.24152513572959e-07	7.83126568021748e-05	-0.113563961370816	0.238281391562526	0.528719504252107	-0.212543750591338	0.0331378767069583	0.339142699844376	0.202656941869878	0.140180972214543	0.745479849914321	-0.490620164043212	0.00117839985740409	0.943701885804439
ADCY9	-0.00255974126775982	0.934662567081241	0.971563793364059	-0.0164969739640286	0.598353274396917	0.908709977014388	-0.0782994982963086	0.0184566111943297	0.124468795492988	-0.10687715592386	0.00211103605353126	0.0848830814829935	0.0757397570285487	0.0962319145665653	0.681204975841491	0.0903801819598318	0.0498833814069717	0.99986486487325
ADD1	0.0678152640101448	0.170048755585362	0.412564640539087	0.0145941245898236	0.763267731595179	0.958057980656888	-0.0651689990329984	0.18665227286612	0.466995142474203	-0.0334501606231967	0.491804738827925	0.864978685969319	0.132984263043143	0.0616947538950935	0.625966676239198	0.0480442852130203	0.485138895354118	0.99986486487325
ADD3	0.282412334092379	0.0100717110214651	0.0723239050861178	-0.193307962218181	0.067471887532071	0.36386354611852	0.26890613169412	0.0136767958675717	0.105182403512911	-0.0736729422049915	0.472014323025584	0.856506352771123	0.0135062023982595	0.925303180007573	0.993430318638325	-0.11963502001319	0.409743209491066	0.99986486487325
ADH5	0.0224555714614816	0.474063831747779	0.719162673423817	0.00350810323240935	0.91046168409526	0.990214665477077	0.0135144805391887	0.665457174551102	0.860220808230728	-0.00800753490680428	0.797533586369455	0.967058687316268	0.00894109092229289	0.839443531189045	0.986830982565768	0.0115156381392136	0.794195029228846	0.99986486487325
ADI1	0.0418902811959549	0.390376804493936	0.653461259569192	-0.089790849710802	0.0732867542805909	0.380283859954902	-0.0258275409440349	0.594557837826438	0.820816092732663	-0.0097562236644988	0.840237076476454	0.97440113922475	0.0677178221399899	0.327371868184108	0.866440003648935	-0.0800346260463032	0.248982853115344	0.99986486487325
ADIPOR1	-0.0625161911473331	0.369013235591438	0.632349713629407	-0.121199319494655	0.0888523880668501	0.415711513788914	-0.0438424282812235	0.526845640177584	0.777848304532818	0.0940705643587538	0.181191619238682	0.641014745065487	-0.0186737628661096	0.84824397022572	0.987766504626882	-0.215269883853409	0.0356727876996616	0.99986486487325
ADIPOR2	0.245445636999886	0.00173023061417326	0.0217069402117559	-0.0842731941777046	0.236222677632961	0.650262678476426	0.0960968088974425	0.178757603630801	0.456022447078357	-0.102598988831803	0.15222959813546	0.606807434478898	0.149348828102443	0.141090476807253	0.745655062372559	0.018325794654098	0.8532989907777	0.99986486487325
ADK	0.166108347370864	0.0173487529963705	0.10420094768445	0.0568243614354138	0.389634228529763	0.78564518173962	0.11226882677559	0.0965509203586624	0.328965261388497	0.0451656078084355	0.492828413376146	0.865363374338036	0.0538395205952735	0.562628742775212	0.943958924422205	0.0116587536269783	0.899882666314986	0.99986486487325
ADM	0.319091630242594	0.31259635071214	0.578139055014245	0.234191243574523	0.456309682061993	0.83639657077685	-0.0416044985578523	0.894093931010942	0.963796149973657	0.0566278550999844	0.856236293550467	0.978875895910063	0.360696128800447	0.417723710722497	0.905610447445428	0.177563388474539	0.688330979308664	0.99986486487325
ADM2	-0.214249215057041	0.000121101868910734	0.00339297072953981	0.00576064227333895	0.902395842277379	0.989788499500203	-0.101252939957551	0.0397448968631324	0.191773353972034	-0.0545857344667855	0.252002216200937	0.708940660916572	-0.112996275099491	0.0988386337509339	0.685229491335734	0.0603463767401244	0.367873323554014	0.99986486487325
ADNP	-0.0160755133790635	0.522457384806953	0.756578104280275	-0.0362615647535645	0.156403969957184	0.543022691783494	-0.0164774691639371	0.512206822582446	0.766237167655247	-0.0203495110352012	0.419417140300559	0.826959113313166	0.000401955784873564	0.990937062437227	0.999753086548426	-0.0159120537183632	0.653671939984311	0.99986486487325
ADNP2	0.0816262655456104	0.0588803066587582	0.220772888127314	-0.0376274178298672	0.369120677231303	0.77263752730711	0.0965302080340376	0.0276770251371636	0.155541644191896	-0.0636093486445901	0.135078057812993	0.579143246813944	-0.0149039424884272	0.79979264510289	0.980358076459027	0.0259819308147229	0.65885800210907	0.99986486487325
ADO	0.147505158353377	0.139683632752638	0.366664766662894	-0.100357483175472	0.308783682955186	0.72144780088512	0.149723435055874	0.134100226371471	0.392418750130889	-0.0940726699442305	0.339404100401148	0.777839482210271	-0.00221827670249652	0.987162125781345	0.999753086548426	-0.00628481323124142	0.963639535887952	0.99986486487325
ADORA1	0.184386455166904	5.67363032612325e-05	0.0019131083310191	0.0502427392572491	0.193481457669199	0.59396988640376	0.0694929120572603	0.0767638744190595	0.28658205563289	-0.0104037838732021	0.783988266294525	0.963445192519344	0.114893543109644	0.040890601510312	0.56378576831291	0.0606465231304512	0.264673940795997	0.99986486487325
ADORA2A	-0.177621042810426	0.120781748126864	0.336287038352429	0.0338017105551378	0.761932790018371	0.958057980656888	-0.114088497300971	0.311526539378837	0.606149026813246	-0.16074881949711	0.158337070962228	0.614246564653165	-0.0635325455094549	0.687450186033601	0.96775154790291	0.194550530052249	0.224665492797375	0.99986486487325
ADORA2B	0.0897970574273419	0.32860343810698	0.59200526275386	-0.113165677295367	0.221041657309763	0.632632977137874	-0.260309721102113	0.00817368321098178	0.0764096261260067	0.0389581240878005	0.66903904135156	0.928442626337688	0.350106778529454	0.0113328905632296	0.380749216559023	-0.152123801383167	0.244001483205914	0.99986486487325
ADORA3	0.276227509054618	0.00270273613527257	0.0298543612183557	-0.229154697647495	0.0104623066455692	0.132993077862329	-0.00646633338454361	0.938007866477106	0.980504269931991	-0.0110410944316346	0.894367327798136	0.986016027802125	0.282693842439161	0.0232372787583512	0.482402217349086	-0.21811360321586	0.0734357912537775	0.99986486487325
ADPGK	-0.224950428870518	0.0174154238301269	0.104275528353595	0.0199169892235265	0.822596477075746	0.974906395681553	-0.0521916923546968	0.558122291441876	0.797199051836567	0.0204892660985525	0.817593391580101	0.970964728034648	-0.172758736515821	0.177505943111545	0.77438415116636	-0.000572276875026034	0.996363405911742	0.99986486487325
ADPRH	-0.0877005041137942	0.0253048520756738	0.132934313546064	0.0772558023834939	0.0462066103883852	0.305395822443179	-0.0928325371957346	0.0186131168944159	0.125260541565362	0.0168271133827798	0.650637848475182	0.921401373982685	0.00513203308194043	0.922030164296094	0.993430318638325	0.0604286890007142	0.255845507088854	0.99986486487325
ADPRHL1	-0.155900702586971	0.000220475730421489	0.00509320136863103	-0.0104317403373848	0.772492385484613	0.961823811414843	-0.095411775644564	0.0134697665017844	0.104304175459946	-0.00456424959526025	0.899262882126154	0.98642616300399	-0.0604889269424067	0.242510564103736	0.819040955074772	-0.00586749074212456	0.908383880525572	0.99986486487325
ADPRHL2	0.17783221508507	0.0263094258506752	0.135529770560854	0.044989877258292	0.554047363674399	0.888163804101882	0.0640530043177812	0.401393010191565	0.688327413979468	-0.0108096823166015	0.886537926561583	0.984928262919863	0.113779210767289	0.294005429224804	0.845672605462548	0.0557995595748935	0.603490168847108	0.99986486487325
ADPRM	0.0150901789254867	0.778920962760733	0.907606861415734	0.0719480387535398	0.188763370272975	0.589540457693627	0.0844826039338207	0.125389632604908	0.379618206657104	0.0826436645386384	0.133408511709427	0.576463937737228	-0.069392425008334	0.365262857425367	0.890269188313893	-0.0106956257850985	0.888038699370697	0.99986486487325
ADRA2B	-0.0197095425039633	0.304158353520666	0.569352861822805	0.00236197750459688	0.900867852138251	0.989536547134506	0.00445750936816491	0.81422751091997	0.933883590067146	0.00442502654102839	0.815555212387758	0.970862527580791	-0.0241670518721282	0.371608451311297	0.893222806596358	-0.00206304903643151	0.938670022974806	0.99986486487325
ADRBK1	0.00581876395292369	0.93888366913453	0.973324152734836	-0.142721867663443	0.0698096948214197	0.370184170042657	0.0193659960377452	0.798710085910861	0.925217445227022	-0.170814547067739	0.0324623472306496	0.334708719731163	-0.0135472320848216	0.899564409453005	0.992978763210073	0.0280926794042955	0.793651546216864	0.99986486487325
ADRBK2	-0.0377342109473613	0.186842630817318	0.436026634811661	-0.00882758227936264	0.753163881076395	0.956463063930149	0.00569761051796203	0.83905822296877	0.942431353820943	-0.002334946419003	0.933642059100209	0.991902101697898	-0.0434318214653233	0.279622028932138	0.83686318842661	-0.00649263586035964	0.86998513429745	0.99986486487325
ADRM1	-0.18896098889098	0.00128342108232229	0.0177022311012916	0.0801788282133256	0.133649507285986	0.503570181739181	-0.229837387003686	0.000178595985972906	0.00644054585938867	0.0790536639991775	0.138925232224878	0.584788209233936	0.0408763981127063	0.580609397026405	0.94579423452311	0.0011251642141481	0.987825418160574	0.99986486487325
ADSL	-0.0612349062676643	0.506801970856978	0.745207184700924	-0.182187196757081	0.056666385408412	0.334349219408617	-0.0270938229781201	0.768099235738648	0.910276687069726	-0.113725142182364	0.222970850275462	0.681646327560334	-0.0341410832895441	0.79271820217025	0.979246347719984	-0.0684620545747165	0.599063937201118	0.99986486487325
ADSS	0.152597096432933	0.0108955463896556	0.0761281164303925	-0.209822787243745	0.000900819080571136	0.0271375277877386	0.0844927506987645	0.138848156413875	0.401424613738533	-0.242651119019145	0.000204170813767371	0.0195183149326581	0.0681043457341683	0.391249480597174	0.90162708764711	0.0328283317754003	0.677524926907135	0.99986486487325
ADSSL1	0.0133157857202608	0.801991114177071	0.918719109219412	-0.0173152956479861	0.744472263467589	0.953909462230465	-0.144505031878436	0.0112951674764292	0.0934811735402902	0.0468681249784506	0.38113022941042	0.806288568595195	0.157820817598696	0.0443979206760789	0.581219737586447	-0.0641834206264367	0.396140857915025	0.99986486487325
ADTRP	0.0165411864485812	0.877228419676744	0.950078235200526	-0.017262664896621	0.871921719293126	0.986040353290079	0.134806423575835	0.21566048461747	0.502147312073565	-0.241252720071972	0.0322685123985085	0.33457618035883	-0.118265237127254	0.437721861515389	0.912254209872544	0.223990055175352	0.148260331656567	0.99986486487325
AEBP2	-0.029179402061712	0.649748635930704	0.836000052389083	-0.0252764824332257	0.693881012536591	0.940217021189861	-0.0653364750545471	0.313570346533228	0.608646946108729	-0.138798765685094	0.0389869064710145	0.364533637756948	0.0361570729928342	0.690556101128668	0.968016377493716	0.113522283251868	0.218221886764532	0.99986486487325
AEN	0.0182959941196703	0.770320159008703	0.904100723995315	0.143749026233289	0.0294543803318166	0.240285734285872	-0.0381769897888766	0.543649531932342	0.790030546177197	0.0517127427673199	0.412288805670671	0.822850537795266	0.0564729839085469	0.525436735360142	0.936324898971781	0.0920362834659691	0.304221658482172	0.99986486487325
AES	-0.133044516468024	0.219396425244931	0.477031235131957	0.0277682847661023	0.794517923292035	0.965294903155208	-0.0756275123650578	0.480202568634934	0.746843612976488	0.0192886495187512	0.856379492784067	0.978923150428795	-0.057417004102966	0.70359020464257	0.969289071464747	0.00847963524735107	0.955119800574138	0.99986486487325
AFF1	0.0366796232487143	0.409384177528409	0.66987603372178	-0.0486462840064599	0.276576478643662	0.691261367949437	0.0420593616611367	0.345282797228343	0.639092388552461	0.0509816456196708	0.254768056570741	0.711101081511712	-0.00537973841242234	0.931310351101636	0.993430318638325	-0.0996279296261307	0.120143088182885	0.99986486487325
AFF4	-0.159690143897862	0.0611128796147996	0.225795760514504	0.0326896990059389	0.690678615126319	0.939476805632426	-0.143382397221639	0.0903465829931826	0.316756899877594	-0.0032064404002643	0.968810891009307	0.995981824173123	-0.0163077466762225	0.888196981699676	0.992978763210073	0.0358961394062032	0.757172705351284	0.99986486487325
AFG3L1P	-0.476137532454084	3.46786835671669e-09	1.13868392125707e-06	-0.0499867924894906	0.344464213867551	0.751259075301091	-0.188234661620083	0.00137876560857984	0.0251714322726914	-0.0527862675177193	0.318660811216443	0.765582598947504	-0.287902870834001	0.00066272760072792	0.144745732795348	0.00279947502822964	0.969840207149391	0.99986486487325
AFG3L2	0.207880922261165	0.00452966500757339	0.0417414786440047	-0.267903514388298	0.000490644932995906	0.0182050108343268	0.144973576974907	0.038672151513981	0.189033253331311	-0.147088009095633	0.0361623213477236	0.350322488056072	0.0629073452862574	0.507808435100112	0.934873383393119	-0.120815505292665	0.209143027226618	0.99986486487325
AFMID	-0.0494526679906793	0.39961478864901	0.660525992245784	0.160431905301266	0.0105181773629308	0.13325192988922	0.0908793073937968	0.128369901900952	0.384102206666046	0.037520956794669	0.521398488641569	0.879678753117459	-0.140331975384476	0.0984312752185872	0.684816250012475	0.122910948506597	0.145050945381622	0.99986486487325
AFTPH	-0.128771661760261	0.0322762201540936	0.153403106287254	0.051449686662405	0.372106602517867	0.773054488326277	-0.0216969102372975	0.704602445724714	0.876797192545501	0.000588653757608526	0.991780371851415	0.998787255920386	-0.107074751522964	0.193439960702933	0.789806008361379	0.0508610329047965	0.530864216185756	0.99986486487325
AGA	0.248027830896319	3.91617091452026e-05	0.00146149546194063	0.160282201546291	0.00332632595368608	0.0660454388738082	0.227622384132498	0.000110609829583525	0.0045972470263281	0.0591241807330007	0.239555275316102	0.698898599980619	0.0204054467638208	0.770920442501716	0.977425817587417	0.101158020813291	0.157605576344836	0.99986486487325
AGAP3	0.056251999247892	0.228799703157547	0.489920933008918	-0.0211053371043919	0.64712283343819	0.927161947662935	0.0146204971931647	0.750871468860635	0.902097114108101	-0.0374378086208225	0.419067373242393	0.826608673411205	0.0416315020547282	0.524052858218259	0.936324898971781	0.0163324715164306	0.801897757443808	0.99986486487325
AGAP6	-0.152475680152216	0.00103091980020309	0.0152183399077599	0.00561887293288343	0.891218621975303	0.98752563261808	-0.0363454620102406	0.38030181917578	0.671696467980012	-0.000861605587154202	0.983265164413857	0.99792082971665	-0.116130218141976	0.0550214220458511	0.603602586598891	0.00648047852003764	0.911186355279146	0.99986486487325
AGAP8	-0.205458034915194	0.000440465731181551	0.00828905900515892	-0.0282247189443829	0.579180413103577	0.901552155148103	-0.123376381196834	0.0218397618923615	0.136020811267397	-0.0194347370237864	0.702054372454558	0.941887829022519	-0.08208165371836	0.259190932237672	0.829721805064633	-0.00878998192059655	0.902486726338883	0.99986486487325
AGBL5	0.0970076514304168	0.000325779357832165	0.00667535102082538	-0.0303356268389994	0.200322577517261	0.607266576956868	0.0516620545835771	0.0346211137812534	0.176963121892822	-0.00437980195791443	0.850712474653952	0.97697739978782	0.0453455968468397	0.176752487776445	0.77430127097737	-0.0259558248810849	0.433232488623362	0.99986486487325
AGFG1	-0.0238120981338383	0.272844749483537	0.535273258140705	-0.0341152874979036	0.121115643964854	0.484967224375936	-0.0248477802807407	0.253076464584386	0.545759513002239	-0.0194327202352129	0.368764972076452	0.799345892558696	0.00103568214690242	0.97273799977663	0.997799070731787	-0.0146825672626907	0.628922660044187	0.99986486487325
AGFG2	0.0344004598918177	0.537796607891186	0.766403876752903	-0.0433467990904139	0.438634658385737	0.823618418735235	0.111828286419808	0.0536624193910585	0.230427100244894	-0.0700226874421652	0.215623447295757	0.675624821816832	-0.0774278265279902	0.329825824089227	0.869123844924373	0.0266758883517513	0.734731323616754	0.99986486487325
AGGF1	0.080611973527386	0.315474738407165	0.580157830051625	-0.119368152470056	0.142223452519413	0.518802357980352	0.0834893497207005	0.298894730891231	0.594241612261725	-0.173549659911902	0.037349191585274	0.356690317631146	-0.00287737619331452	0.979561353515328	0.999251867720079	0.0541815074418466	0.630386929664784	0.99986486487325
AGL	0.0320643141262451	0.417124049156582	0.676101237189621	0.086327829172367	0.0361567670320805	0.271246316298434	0.0557199944096487	0.164457903949292	0.438280770092263	0.0890392576531891	0.0311809733605981	0.329452651334172	-0.0236556802834036	0.670448482581675	0.964737431276536	-0.00271142848082206	0.961022202106395	0.99986486487325
AGPAT2	0.0418917219452544	0.372902586251537	0.635970625917562	0.112081484829864	0.0232070060713545	0.209604631903869	0.00946351150809921	0.839157515632953	0.942431353820943	0.11240190041046	0.0228571770451005	0.284162317468843	0.0324282104371552	0.623623341921224	0.9584132271009	-0.000320415580596034	0.996121034062625	0.99986486487325
AGPAT3	0.0272714356607162	0.606763849365655	0.811736272276098	-0.0517709998893112	0.332139416630001	0.742811215688691	0.0497927687969781	0.350576939706978	0.644226909562363	-0.0149111741521226	0.777946189881697	0.963015551077205	-0.0225213331362619	0.763313465430096	0.976236678571097	-0.0368598257371886	0.622697570329742	0.99986486487325
AGPAT4	-0.225235303666313	5.0254966207836e-05	0.00177555229874009	-0.0787577294686086	0.0959187571180141	0.430737970048652	-0.0365873912220085	0.428259829568176	0.707995348727021	-0.151457627911419	0.00284162577353251	0.0970974539119488	-0.188647912444305	0.00732959178486345	0.344446477498302	0.07269989844281	0.268848613225927	0.99986486487325
AGPAT5	0.0499348881179449	0.0863593976074277	0.277152438456483	0.0333162715502011	0.244169203265292	0.658580032526241	0.0603459297473465	0.0409774124249282	0.194560374680049	-0.00924509607069179	0.743157341951898	0.952598304857378	-0.0104110416294017	0.794065491351971	0.979615265365983	0.0425613676208929	0.291476656477395	0.99986486487325
AGPAT6	0.0133997089963689	0.689180841751238	0.859987144680883	-0.0182066961207896	0.587374002759838	0.905152249813637	0.00329508545944801	0.921521255560821	0.974651612640028	-0.0771433116394897	0.0287791615202343	0.318354500208141	0.0101046235369209	0.830905143686439	0.985680586449411	0.0589366155187001	0.220351945932789	0.99986486487325
AGPAT9	-0.456652922739966	0.0233742825628964	0.126479085264321	0.0696928805832684	0.714361572125578	0.945355624943217	-0.43000878758434	0.0317267338743847	0.168822764414639	0.143176391129368	0.454224951231722	0.846243890026965	-0.0266441351556264	0.921076111956503	0.993430318638325	-0.0734835105460991	0.784807507695879	0.99986486487325
AGPHD1	-0.0041138537267873	0.867120121051196	0.946613921101488	-0.0267900321606618	0.28189351448052	0.69675840384717	-0.0632855181513579	0.0158726427300727	0.114516589066065	-0.0186666642128461	0.450437916407633	0.844398747467052	0.0591716644245706	0.0986487045522746	0.685122103902133	-0.00812336794781565	0.815331335397097	0.99986486487325
AGPS	-0.195276504672066	0.0556836535070334	0.21399029738668	0.0279642564226013	0.775503627231948	0.962369558070638	-0.0134198466403248	0.891068904506404	0.962628548844085	-0.0250826782659956	0.79807331354912	0.967058687316268	-0.181856658031741	0.197514905768481	0.790390655783114	0.0530469346885969	0.702270141034539	0.99986486487325
AGRN	-0.0929275374583618	0.199766511831052	0.452345942199908	0.0278245027147044	0.696300370405127	0.940602552655787	-0.0873880525359851	0.226948369062371	0.515095789310753	-0.0368480450632891	0.605679251190344	0.912565146764001	-0.00553948492237666	0.956108339500422	0.995471413065986	0.0646725477779935	0.522375967777804	0.99986486487325
AGTPBP1	0.113480837093761	0.116710892130358	0.330268455056755	-0.0483300431116724	0.494552981082974	0.86176920200505	0.121312934663903	0.0947626165467577	0.326287619138066	0.0935759427275489	0.192034868146611	0.650266061624009	-0.00783209757014269	0.937292823188065	0.993430318638325	-0.141905985839221	0.162981404461648	0.99986486487325
AGTRAP	0.0719217802078056	0.154246666941675	0.389850784555832	0.0637230009998202	0.204717386940917	0.61237719226653	0.0567434007919498	0.257050410668639	0.549769526282905	0.0602601313753253	0.229554315295073	0.687232700930111	0.0151783794158558	0.82795240964562	0.984739698165964	0.00346286962449494	0.960435722542158	0.99986486487325
AGXT2L2	0.00852136073753851	0.719863544674879	0.876114627796854	0.019048569448378	0.425317058929625	0.814496795334231	0.0256468113776069	0.285786088273248	0.58100366158365	0.0514683857769995	0.0386393906202894	0.364043670451942	-0.0171254506400684	0.610804452490717	0.956047724789926	-0.0324198163286216	0.33883076765685	0.99986486487325
AHCTF1	0.0595734387729898	0.170723258543917	0.413054006698651	0.023350636355767	0.584773786329258	0.903604070633721	0.120357806202319	0.00889898594219728	0.0804828241958738	-0.0439901092852537	0.307266551233791	0.756554331887454	-0.0607843674293296	0.318247190408543	0.859055945908873	0.0673407456410207	0.2700187877533	0.99986486487325
[truncated: 9,387 more rows]

## Sheet: Table S8
Table S8. KEGG Pathways and GO categories enriched among differentially responding genes, upon MTB infection, in miR-29 perturbation experiments
[truncated: 44 more rows]

[truncated: 1 more sheets: Table S9]
